# Supplementary material for: Ligand-free copper-catalyzed regio- and stereoselective 1,1-alkylmonofluoroalkylation of terminal alkynes
Source: Royal Society of Chemistry journal article supplement (doi:10.1039/d0cc05887d), 2020-01-01

## Supporting Information

### **Ligand-free copper-catalyzed regio- and stereoselective 1,1-alkylmonofluoroalkylation of terminal alkynes**

*Yunhe Lv,\* Weiya Pu and Xiaoxing Wang*

## Table of Contents

|                                                                                                     |     |
|-----------------------------------------------------------------------------------------------------|-----|
| 1. General Information.....                                                                         | S3  |
| 2. Screening Reaction Conditions.....                                                               | S4  |
| 3. Synthesis of Substrates.....                                                                     | S5  |
| 4. General Procedure for 1,1-Alkylmonofluoroalkylation of Terminal Alkynes.....                     | S6  |
| 5. Synthetic Applications.....                                                                      | S6  |
| 6. Analytical Data of Compounds 4, 5, 7, 9-12.....                                                  | S9  |
| 7. Structure Analysis X-Ray Crystallography of 4k.....                                              | S40 |
| 8. Mechanistic Study.....                                                                           | S41 |
| 9. References.....                                                                                  | S43 |
| 10. <sup>1</sup> H, <sup>13</sup> C and <sup>19</sup> F NMR Spectra of Compounds 4, 5, 7, 9-12..... | S44 |

## 1. General Information

All deuterated solvents were purchased from Cambridge Isotope Laboratories.  $^1\text{H}$  NMR,  $^{13}\text{C}$  NMR and  $^{19}\text{F}$  NMR spectra were recorded at 25 °C on a Bruker Advance 400 spectrometer ( $^1\text{H}$ : 400 MHz,  $^{13}\text{C}$ :100 MHz, and  $^{19}\text{F}$ :376 MHz).  $^1\text{H}$  NMR chemical shifts were determined relative to internal  $(\text{CH}_3)_4\text{Si}$  (TMS) at  $\delta$  0.00 ppm or to the signal of the residual protonated solvent:  $\text{CDCl}_3$  at  $\delta$  7.26 ppm.  $^{13}\text{C}$  NMR chemical shifts were determined relative to the signal of the solvent:  $\text{CDCl}_3$  at  $\delta$  77.00 ppm. Data for  $^1\text{H}$ ,  $^{13}\text{C}$ ,  $^{19}\text{F}$  NMR were recorded as follows: chemical shift ( $\delta$ , ppm), multiplicity (s = singlet, d = doublet, t = triplet, m = multiplet, q = quartet, dd = doublet of doublets, dt = doublet of triplets), coupling constants (Hz) and integration. Melting points were obtained with a micro melting point XT4A Beijing Keyi electrooptic apparatus and are uncorrected. High-resolution mass data were recorded on a Waters LCT Premierxe<sup>TM</sup> (USA). Single-crystal X-ray crystallography was carried out on a Bruker Smart Apex II diffractometer system.

### Materials and Methods:

Unless otherwise stated, starting materials were purchased from Aldrich or Energy-Chemical Limited and used as supplied without further purification. Solvents were used directly without further purification. The following starting materials were prepared according to the procedures described previously in the literature: **1v**,<sup>1</sup> **3c-3e**,<sup>2</sup> **13**,<sup>3</sup> **14**.<sup>3</sup> The alkynes 1,1-alkylmonofluoroalkylation reactions were performed under nitrogen atmosphere in flame dried flasks. All reactions were monitored by thin layer chromatography (TLC) with Taizhou GF254 silica gel coated plates. Flash column chromatography was carried out using 200-300 mesh silica gel at increased pressure.

## 2. Screening Reaction Conditions

**Table 1** Optimization of the reaction conditions<sup>a</sup>

$\text{Ph}-\text{C}\equiv\text{CH}$  (1a) +  $\text{Cl}-\text{CH}_2-\text{C}(=\text{O})-\text{AQ}$  (2a) +  $\text{MeO}-\text{C}(=\text{O})-\text{CH}(\text{F})-\text{C}(=\text{O})-\text{OMe}$  (3a)  $\xrightarrow[\text{additive solvent}]{\text{copper salt}}$   $\text{Ph}-\text{CH}=\text{CH}-\text{CF}(\text{COOMe})_2-\text{C}(=\text{O})-\text{AQ}$  (4a)

| Entry    | Catalyst   | Base                                | Solvent            | Yield (%) <sup>b</sup> |
|----------|------------|-------------------------------------|--------------------|------------------------|
| 1        | CuI        | Cs <sub>2</sub> CO <sub>3</sub>     | dioxane            | 81                     |
| 2        | CuI        | Cs <sub>2</sub> CO <sub>3</sub>     | CH <sub>3</sub> CN | 76                     |
| 3        | CuI        | Cs <sub>2</sub> CO <sub>3</sub>     | acetone            | 55                     |
| 4        | CuI        | Cs <sub>2</sub> CO <sub>3</sub>     | CHCl <sub>3</sub>  | 40                     |
| 5        | CuI        | Cs <sub>2</sub> CO <sub>3</sub>     | DMF                | 46                     |
| <b>6</b> | <b>CuI</b> | <b>Cs<sub>2</sub>CO<sub>3</sub></b> | <b>THF</b>         | <b>94</b>              |
| 7        | CuI        | none                                | THF                | 0                      |
| 8        | none       | Cs <sub>2</sub> CO <sub>3</sub>     | THF                | 0                      |
| 9        | CuI        | Na <sub>2</sub> CO <sub>3</sub>     | THF                | 38                     |
| 10       | CuI        | NaHCO <sub>3</sub>                  | THF                | 34                     |
| 11       | CuI        | K <sub>2</sub> CO <sub>3</sub>      | THF                | 32                     |
| 12       | CuI        | Et <sub>3</sub> N                   | THF                | 15                     |
| 13       | CuCl       | Cs <sub>2</sub> CO <sub>3</sub>     | THF                | 89                     |
| 14       | CuBr       | Cs <sub>2</sub> CO <sub>3</sub>     | THF                | 90                     |

<sup>a</sup> Reactions were carried out with **1a** (0.33 mmol), **2a** (0.3 mmol), **3a** (0.45 mmol), catalyst (10 mol %), and base (0.36 mmol) in 0.9 mL of solvent under a N<sub>2</sub> atmosphere at 80 °C for 1.5 h, unless noted otherwise. <sup>b</sup> Yield of the isolated product.

Dimethyl 2-fluoromalonate derivatives are useful fluorinated building blocks for monofluoroalkylations. Recently, various alkylation, Mannich reaction, Michael addition and heterocycle formation processes using simple and inexpensive nucleophilic monofluoroalkylation reagents for the synthesis of fluorinated derivatives have been reported.<sup>4</sup> Therefore, we first focused on the copper-catalyzed 1,1-alkylmonofluoroalkylation of ethynylbenzene (**1a**), 2-chloro-*N*-(quinolin-8-yl)acetamide (**2a**), and dimethyl 2-fluoromalonate (**3a**) according to our previous work. To our delight, in the presence of CuI, Phen and Cs<sub>2</sub>CO<sub>3</sub> and using 0.9 mL of dioxane at 80 °C for 1.5 h under N<sub>2</sub>, the desired product **4a** was obtained in 80% yield. Surprisingly, when the reaction was performed under the same conditions but without 1,10-phenanthroline as a



ligand, similar results were obtained (Table 1, entry 1). Encouraged by this first example of a ligand-free copper-catalyzed 1,1-alkylmonofluoroalkylation, a series of solvents were screened, and tetrahydrofuran showed the best activity (Table 1, entries 2-6). Control experiments demonstrated that the base and catalyst were essential (Table 1, entries 7 and 8). However, other bases, such as  $\text{Na}_2\text{CO}_3$ ,  $\text{NaHCO}_3$ ,  $\text{K}_2\text{CO}_3$ , and  $\text{Et}_3\text{N}$ , were not as effective as  $\text{Cs}_2\text{CO}_3$  (Table 1, entries 9-12). In addition, when  $\text{CuCl}$  and  $\text{CuBr}$  were used as catalysts, **4a** was obtained in good yields (Table 1, entries 13 and 14).

### 3. Synthesis of Substrates

Substrate **2** was prepared through the reaction of quinolin-8-amine and corresponding acyl chlorides in  $\text{CH}_2\text{Cl}_2$  at room temperature (**2a** as an example).

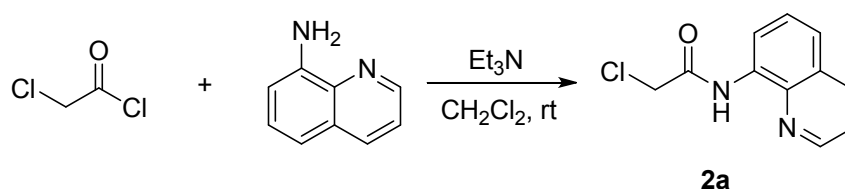

To a solution of quinolin-8-amine (0.72 g, 5.0 mmol) in  $\text{CH}_2\text{Cl}_2$  (10 mL) at room temperature was added 2-chloroacetyl chloride (0.48 mL, 6.0 mmol),  $\text{Et}_3\text{N}$  (0.83 mL, 6.0 mmol) in one portion. The reaction mixture was stirred for 20 min. After completion of the reaction (TLC monitoring), the mixture was quenched by water and extracted with  $\text{CH}_2\text{Cl}_2$  ( $3 \times 10$  mL). The combined organic layers were dried ( $\text{Na}_2\text{SO}_4$ ), filtered over Celite, evaporated *in vacuo*, and the residue was purified by column chromatography to give the compound **2a** (1.05 g, 95%).

Substrate **8** was prepared through the reaction of citronellol and 3-bromoprop-1-yne in anhydrous DMF at 80 °C.

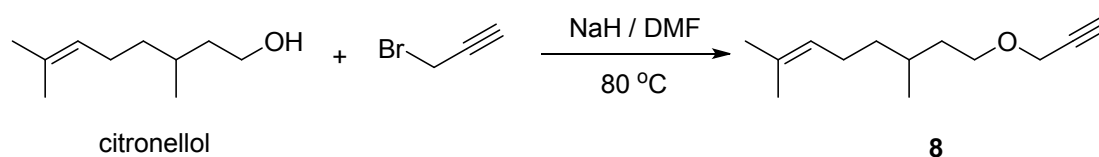

To the well stirred anhydrous DMF (5 mL), cooling by ice-water, added citronellol (0.37 mL, 2

mmol), NaH (70%, 0.082 g, 2.4 mmol) and 3-bromoprop-1-yne (0.26 mL, 3 mmol). The reaction mixture was stirred at 80 °C for 4 h (monitored by TLC) before it was slowly poured into water (5 mL). Extracted with CH<sub>2</sub>Cl<sub>2</sub> (3×5 mL), then the organic phase was washed with water (3×5 mL), the solvent was removed under reduced pressure, and the residue was purified by column chromatography (eluent: diethyl ether/petroleum ether = 1/50) afforded the product **8** (0.245 g, 63%).

#### 4. General Procedure for 1,1-Alkylmonofluoroalkylation of Terminal Alkynes

##### 4a as an example

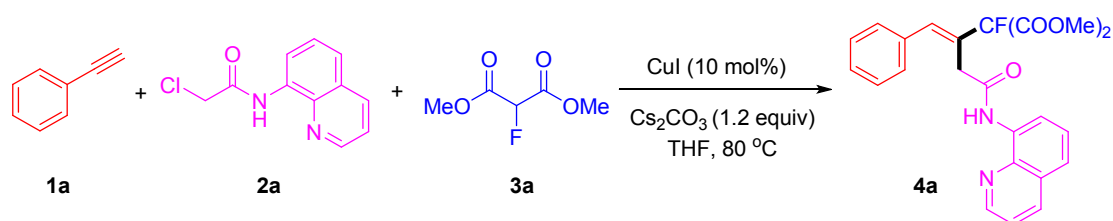

To a solution of the 2-chloro-*N*-(quinolin-8-yl)acetamide **2a** (66.2 mg, 0.3 mmol) in tetrahydrofuran (0.9 mL) was added the ethynylbenzene **1a** (38 μL, 0.33 mmol), dimethyl 2-fluoromalonate **3a** (70.4 mg, 0.45 mmol), CuI (5.7 mg, 0.03 mmol), and Cs<sub>2</sub>CO<sub>3</sub> (117.3 mg, 0.36 mmol) under N<sub>2</sub> in screw-cap test tube. The reaction mixture was stirred at 80 °C for 1.5 h. After the reaction finished, the reaction mixture was cooled to room temperature and quenched by water. The mixture was extracted with EtOAc (3.0 mL×3), the combined organic phases were dried over anhydrous Na<sub>2</sub>SO<sub>4</sub> and the solvent was evaporated under vacuum. The residue was purified by column chromatography to give the corresponding products **4a** (123.1 mg, 94%).

#### 5. Synthetic Applications

##### 5.1 Synthesis of 7

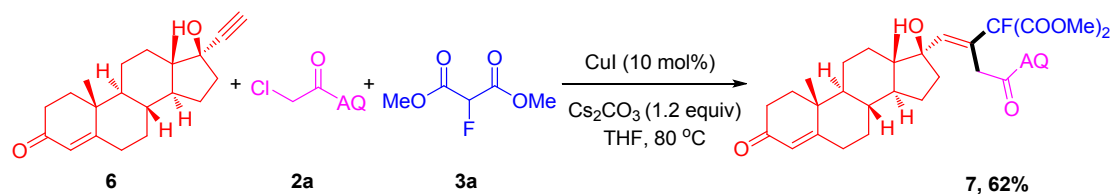

Following the general procedure 4, the reaction with **6** (103.1 mg, 0.33 mmol), **2a** (66.2 mg, 0.3 mmol), **3a** (70.4 mg, 0.45 mmol), CuI (5.7 mg, 0.03 mmol), and Cs<sub>2</sub>CO<sub>3</sub> (117.3 mg, 0.36 mmol) under N<sub>2</sub> for 1.5 h at 80 °C afforded **7** as white solid (120.0 mg, 62% yield).

## 5.2 Synthesis of 9

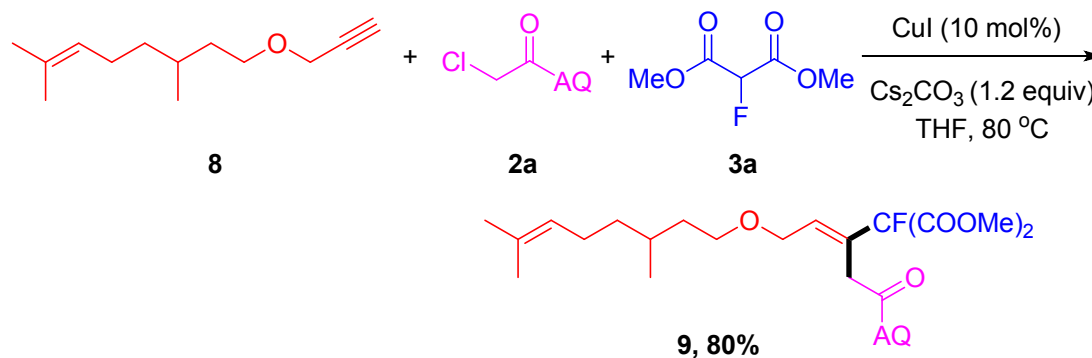

Following the general procedure 4, the reaction with **8** (64.1 mg, 0.33 mmol), **2a** (66.2 mg, 0.3 mmol), **3a** (70.4 mg, 0.45 mmol), CuI (5.7 mg, 0.03 mmol), and Cs<sub>2</sub>CO<sub>3</sub> (117.3 mg, 0.36 mmol) under N<sub>2</sub> for 1.5 h at 80 °C afforded **9** as colorless oil (127.0 mg, 80% yield).

## 5.3 Synthesis of 4a in Gram Scale and Removing Methyl Ester Group

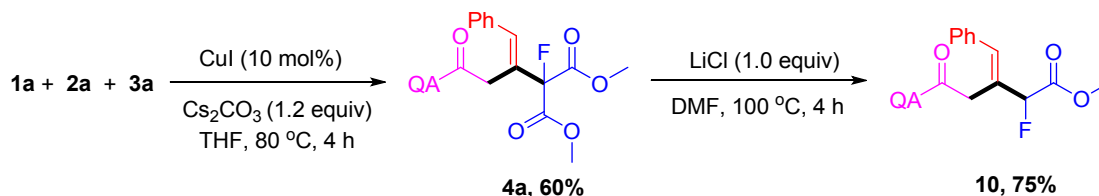

### Synthesis of 4a in gram scale

Following the general procedure 4, the reaction with **1a** (0.63 mL, 5.5 mmol), **2a** (1.10 g, 5 mmol), **3a** (1.17 g, 7.5 mmol), CuI (95.0 mg, 0.5 mmol), and Cs<sub>2</sub>CO<sub>3</sub> (1.95 g, 6.0 mmol) under N<sub>2</sub> for 4 h at 80 °C in THF (15 mL) afforded **4a** as white solid (1.31 g, 60% yield).

### Removing methyl ester group in 4a<sup>5</sup>

Under an atmosphere of N<sub>2</sub>, compound **4a** (131 mg, 0.3 mmol) was taken in a seal tube vial in anhydrous DMF (0.6 mL) with LiCl (13 mg, 0.3 mmol). Seal tube was tightly closed with teflon cap and heated at 100 °C for 4 h. After completion of the reaction, the reaction was quenched with the addition of saturated NH<sub>4</sub>Cl solution (0.3 mL), and extracted with EtOAc (3 × 3 mL). The

combined extracts were dried over Na<sub>2</sub>SO<sub>4</sub>. After concentration in vacuum, the residue was purified by column chromatography to give the corresponding products **10** (85.1 mg, 75%).

#### 5.4 Synthesis of **11** and **12**

##### Removing the AQ group in **4a**

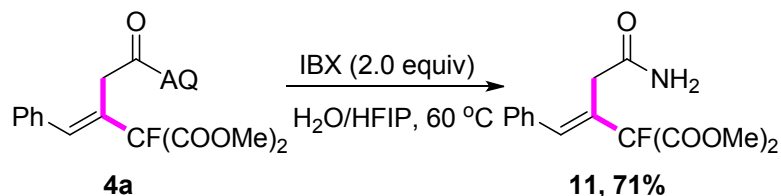

Following the general procedure described previously in the literature,<sup>6</sup> to a round-bottom flask (25 mL) were added the compound **4a** (131 mg, 0.3 mmol) and IBX (168 mg, 0.6 mmol). The mixture in 2 mL of mixed solvent ( $V_{\text{HFIP}}/V_{\text{H}_2\text{O}} = 1:1$ ) was stirred at 60 °C in oil bath under air atmosphere for 1.5 h (monitored by TLC). The reaction was quenched by the addition of NaHCO<sub>3</sub> (aq 10 mL); the resulting mixture was extracted with dichloromethane (6 mL x 3). The organic solvent was concentrated in vacuo. The residue was purified by column chromatography to give the corresponding products **11** (66.0 mg, 71%).

##### Conversion of primary amide to carboxylic acid

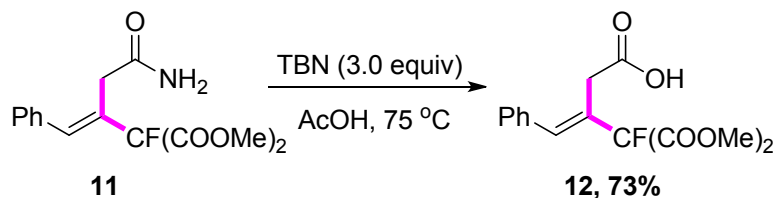

Following the general procedure described previously in the literature,<sup>7</sup> to a stirred solution of the compound **11** (93 mg, 0.3 mmol) in acetic acid (2 mL) was slowly added *tert*-butyl nitrite (107  $\mu\text{L}$ , 0.9 mmol). The reaction mixture was stirred at 75 °C under air atmosphere for 2 h while the progress was monitored by TLC. The reaction mixture was concentrated in vacuo. The residue was purified by column chromatography to give the corresponding products **12** (68.0 mg, 73%).

#### 6. Analytical Data of Compounds **4**, **5**, **7**, **9-12**

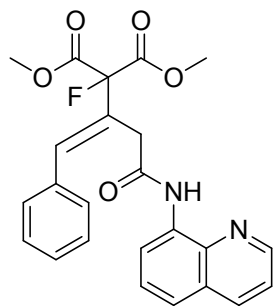

**(E)-dimethyl 2-fluoro-2-(4-oxo-1-phenyl-4-(quinolin-8-ylamino)but-1-en-2-yl)malonate 4a**

White solid. mp: 124-125 °C.  $^1\text{H}$  NMR (400 MHz,  $\text{CDCl}_3$ ):  $\delta$  = 3.77 (d,  $J$  = 1.6 Hz, 2H), 3.84 (s, 6H), 7.24-7.33 (m, 4H), 7.42-7.45 (m, 3H), 7.48-7.52 (m, 2H), 8.14 (dd,  $J_1$  = 1.6 Hz,  $J_2$  = 8.0 Hz, 1H), 8.74 (dd,  $J_1$  = 2.4 Hz,  $J_2$  = 6.4 Hz, 1H), 8.78 (dd,  $J_1$  = 1.2 Hz,  $J_2$  = 4.0 Hz, 1H), 9.98 (s, 1H);  $^{13}\text{C}$  NMR (100 MHz,  $\text{CDCl}_3$ ):  $\delta$  = 37.3 (d,  $J$  = 4.0 Hz), 53.7, 95.1 (d,  $J$  = 201.0 Hz), 116.3, 121.6 (d,  $J$  = 6.0 Hz), 127.3, 127.6, 127.8, 127.9, 128.1, 128.5, 128.7, 134.4, 134.6 (d,  $J$  = 12.0 Hz), 135.1, 136.2, 138.4, 148.2, 165.7 (d,  $J$  = 25.0 Hz), 167.9;  $^{19}\text{F}$  NMR (376 MHz,  $\text{CDCl}_3$ ):  $\delta$  = -158.9. HRMS (ESI-TOF). Calcd for  $\text{C}_{24}\text{H}_{21}\text{FN}_2\text{O}_5\text{Na}$ ,  $[\text{M}+\text{Na}]^+$   $m/z$  459.1332, Found 459.1327.

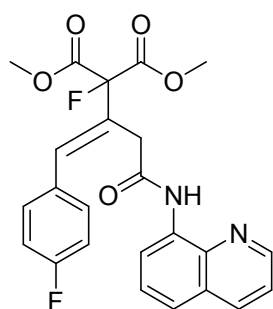

**(E)-dimethyl 2-fluoro-2-(1-(4-fluorophenyl)-4-oxo-4-(quinolin-8-ylamino)but-1-en-2-yl)malonate 4b**

White solid. mp: 111-113 °C.  $^1\text{H}$  NMR (400 MHz,  $\text{CDCl}_3$ ):  $\delta$  = 3.74 (d,  $J$  = 1.6 Hz, 2H), 3.84 (s, 6H), 7.00 (t,  $J$  = 8.4 Hz, 2H), 7.24 (s, 1H), 7.41-7.45 (m, 3H), 7.48-7.53 (m, 2H), 8.14 (dd,  $J_1$  = 1.6 Hz,  $J_2$  = 8.0 Hz, 1H), 8.73 (dd,  $J_1$  = 2.8 Hz,  $J_2$  = 6.0 Hz, 1H), 8.77 (dd,  $J_1$  = 1.6 Hz,  $J_2$  = 4.4 Hz, 1H), 9.96 (s, 1H);  $^{13}\text{C}$  NMR (100 MHz,  $\text{CDCl}_3$ ):  $\delta$  = 37.1 (d,  $J$  = 4.0 Hz), 53.7, 95.0 (d,  $J$  = 201.0 Hz), 115.4, 115.6, 116.3, 121.6 (d,  $J$  = 2.0 Hz), 127.2, 127.6, 127.9, 130.5 (d,  $J$  = 8.0 Hz), 131.1 (d,  $J$  = 3.0 Hz), 133.4 (d,  $J$  = 12.0 Hz), 134.2, 136.2, 138.3, 148.2, 162.4 (d,  $J$  = 247.0 Hz), 165.6 (d,  $J$  = 25.0 Hz), 167.7;  $^{19}\text{F}$  NMR (376 MHz,  $\text{CDCl}_3$ ):  $\delta$  = -159.3, -113.2. HRMS (ESI-TOF). Calcd for  $\text{C}_{24}\text{H}_{21}\text{F}_2\text{N}_2\text{O}_5$ ,  $[\text{M}+\text{H}]^+$   $m/z$  455.1419, Found 455.1437.

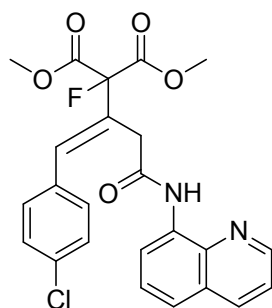

**(E)-dimethyl 2-(1-(4-chlorophenyl)-4-oxo-4-(quinolin-8-ylamino)but-1-en-2-yl)-2-fluoromalonate 4c**

White solid. mp: 94-96 °C.  $^1\text{H}$  NMR (400 MHz,  $\text{CDCl}_3$ ):  $\delta$  = 3.73 (d,  $J$  = 1.6 Hz, 2H), 3.84 (s, 6H), 7.23 (s, 1H), 7.28 (d,  $J$  = 8.4 Hz, 2H), 7.38 (d,  $J$  = 8.4 Hz, 2H), 7.45 (dd,  $J_1$  = 4.4 Hz,  $J_2$  = 8.4 Hz, 1H), 7.50-7.55 (m, 2H), 8.16 (dd,  $J_1$  = 1.6 Hz,  $J_2$  = 8.0 Hz, 1H), 8.72 (dd,  $J_1$  = 3.2 Hz,  $J_2$  = 5.6 Hz, 1H), 8.79 (dd,  $J_1$  = 1.2 Hz,  $J_2$  = 4.0 Hz, 1H), 9.94 (s, 1H);  $^{13}\text{C}$  NMR (100 MHz,  $\text{CDCl}_3$ ):  $\delta$  = 37.2 (d,  $J$  = 4.0 Hz), 53.7, 94.9 (d,  $J$  = 201.0 Hz), 116.3, 121.7 (d,  $J$  = 2.0 Hz), 127.3, 127.9, 128.3, 128.5, 128.7, 130.1, 133.2 (d,  $J$  = 11.0 Hz), 133.6, 134.1, 134.3, 136.3, 138.3, 148.2, 165.5 (d,  $J$  = 26.0 Hz), 167.7;  $^{19}\text{F}$  NMR (376 MHz,  $\text{CDCl}_3$ ):  $\delta$  = -159.6. HRMS (ESI-TOF). Calcd for  $\text{C}_{24}\text{H}_{21}\text{ClFN}_2\text{O}_5$ ,  $[\text{M}+\text{H}]^+$   $m/z$  471.1123, Found 471.1138.

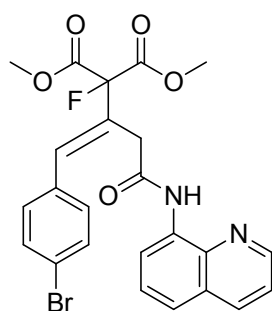

**(E)-dimethyl 2-(1-(4-bromophenyl)-4-oxo-4-(quinolin-8-ylamino)but-1-en-2-yl)-2-fluoromalonate 4d**

White solid. mp: 114-115 °C.  $^1\text{H}$  NMR (400 MHz,  $\text{CDCl}_3$ ):  $\delta$  = 3.73 (d,  $J$  = 1.2 Hz, 2H), 3.84 (s, 6H), 7.21 (s, 1H), 7.31 (d,  $J$  = 8.4 Hz, 2H), 7.43-7.47 (m, 3H), 7.51-7.54 (m, 2H), 8.16 (dd,  $J_1$  = 1.2 Hz,  $J_2$  = 8.0 Hz, 1H), 8.72 (dd,  $J_1$  = 3.2 Hz,  $J_2$  = 5.6 Hz, 1H), 8.79 (dd,  $J_1$  = 1.2 Hz,  $J_2$  = 4.0 Hz, 1H), 9.93 (s, 1H);  $^{13}\text{C}$  NMR (100 MHz,  $\text{CDCl}_3$ ):  $\delta$  = 37.2 (d,  $J$  = 4.0 Hz), 53.7, 94.9 (d,  $J$  = 202.0 Hz), 116.3, 121.7 (d,  $J$  = 2.0 Hz), 122.3, 127.3, 127.9, 128.4, 128.6, 130.3, 131.7, 133.2 (d,  $J$  =

12.0 Hz), 134.1, 134.2, 136.3, 138.3, 148.2, 165.5 (d,  $J = 26.0$  Hz), 167.6;  $^{19}\text{F}$  NMR (376 MHz,  $\text{CDCl}_3$ ):  $\delta = -159.6$ . HRMS (ESI-TOF). Calcd for  $\text{C}_{24}\text{H}_{21}\text{BrFN}_2\text{O}_5$ ,  $[\text{M}+\text{H}]^+$   $m/z$  515.0618, 517.0597, Found 515.0611, 517.0565.

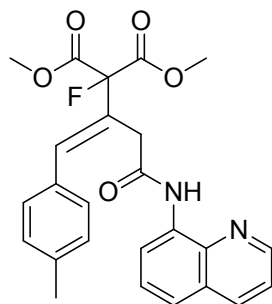

**(E)-dimethyl 2-fluoro-2-(4-oxo-4-(quinolin-8-ylamino)-1-(p-tolyl)but-1-en-2-yl)malonate 4e**

White solid. mp: 68-70 °C.  $^1\text{H}$  NMR (400 MHz,  $\text{CDCl}_3$ ):  $\delta = 2.29$  (s, 3H), 3.76 (d,  $J = 1.6$  Hz, 2H), 3.83 (s, 6H), 7.12 (d,  $J = 8.0$  Hz, 2H), 7.25 (s, 1H), 7.32 (d,  $J = 8.0$  Hz, 2H), 7.44 (dd,  $J_1 = 4.4$  Hz,  $J_2 = 8.4$  Hz, 1H), 7.48-7.54 (m, 2H), 8.14 (dd,  $J_1 = 1.6$  Hz,  $J_2 = 8.4$  Hz, 1H), 8.74 (dd,  $J_1 = 2.4$  Hz,  $J_2 = 6.8$  Hz, 1H), 8.78 (dd,  $J_1 = 1.6$  Hz,  $J_2 = 4.4$  Hz, 1H), 9.99 (s, 1H);  $^{13}\text{C}$  NMR (100 MHz,  $\text{CDCl}_3$ ):  $\delta = 21.2$ , 37.4 (d,  $J = 4.0$  Hz), 53.7, 95.2 (d,  $J = 201.0$  Hz), 116.3, 121.6 (d,  $J = 7.0$  Hz), 126.9, 127.1, 127.3, 127.9, 128.7, 129.2, 132.2, 134.4, 134.6 (d,  $J = 11.0$  Hz), 136.2, 138.0, 138.4, 148.2, 165.7 (d,  $J = 26.0$  Hz), 168.0;  $^{19}\text{F}$  NMR (376 MHz,  $\text{CDCl}_3$ ):  $\delta = -159.0$ . HRMS (ESI-TOF). Calcd for  $\text{C}_{25}\text{H}_{24}\text{FN}_2\text{O}_5$ ,  $[\text{M}+\text{H}]^+$   $m/z$  451.1669, Found 451.1691.

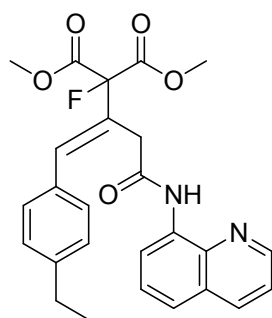

**(E)-dimethyl 2-(1-(4-ethylphenyl)-4-oxo-4-(quinolin-8-ylamino)but-1-en-2-yl)-2-fluoromalonate 4f**

White solid. mp: 78-79 °C.  $^1\text{H}$  NMR (400 MHz,  $\text{CDCl}_3$ ):  $\delta = 1.17$  (t,  $J = 7.6$  Hz, 3H), 2.59 (q,  $J = 7.6$  Hz, 2H), 3.77 (d,  $J = 1.2$  Hz, 2H), 3.83 (s, 6H), 7.14 (d,  $J = 8.0$  Hz, 2H), 7.26 (s, 1H), 7.35 (d,  $J = 8.0$  Hz, 2H), 7.43 (dd,  $J_1 = 4.4$  Hz,  $J_2 = 8.4$  Hz, 1H), 7.48-7.53 (m, 2H), 8.14 (dd,  $J_1 = 1.2$  Hz,

$J_2 = 8.0$  Hz, 1H), 8.75 (dd,  $J_1 = 2.4$  Hz,  $J_2 = 6.8$  Hz, 1H), 8.77 (dd,  $J_1 = 1.2$  Hz,  $J_2 = 4.0$  Hz, 1H), 10.00 (s, 1H);  $^{13}\text{C}$  NMR (100 MHz,  $\text{CDCl}_3$ ):  $\delta = 15.3, 28.5, 37.4$  (d,  $J = 4.0$  Hz), 53.6, 95.2 (d,  $J = 200.0$  Hz), 116.3, 121.5 (d,  $J = 7.0$  Hz), 126.8, 127.0, 127.3, 127.9, 128.0, 128.7, 132.4, 134.4, 134.6 (d,  $J = 12.0$  Hz), 136.2, 138.4, 144.3, 148.2, 165.7 (d,  $J = 26.0$  Hz), 168.0;  $^{19}\text{F}$  NMR (376 MHz,  $\text{CDCl}_3$ ):  $\delta = -159.0$ . HRMS (ESI-TOF). Calcd for  $\text{C}_{26}\text{H}_{26}\text{FN}_2\text{O}_5$ ,  $[\text{M}+\text{H}]^+$   $m/z$  465.1826, Found 465.1848.

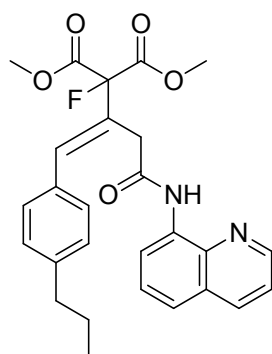

**(*E*)-dimethyl 2-fluoro-2-(4-oxo-1-(4-propylphenyl)-4-(quinolin-8-ylamino)but-1-en-2-yl)malonate 4g**

White solid. mp: 91-92 °C.  $^1\text{H}$  NMR (400 MHz,  $\text{CDCl}_3$ ):  $\delta = 0.88$  (t,  $J = 7.2$  Hz, 3H), 1.52-1.62 (m, 2H), 2.52 (t,  $J = 7.6$  Hz, 2H), 3.77 (s, 2H), 3.83 (s, 6H), 7.12 (d,  $J = 8.0$  Hz, 2H), 7.25 (s, 1H), 7.34 (d,  $J = 8.0$  Hz, 2H), 7.43 (dd,  $J_1 = 4.4$  Hz,  $J_2 = 8.4$  Hz, 1H), 7.48-7.53 (m, 2H), 8.14 (dd,  $J_1 = 1.2$  Hz,  $J_2 = 8.0$  Hz, 1H), 8.75 (dd,  $J_1 = 2.4$  Hz,  $J_2 = 6.8$  Hz, 1H), 8.77 (dd,  $J_1 = 1.2$  Hz,  $J_2 = 4.0$  Hz, 1H), 10.00 (s, 1H);  $^{13}\text{C}$  NMR (100 MHz,  $\text{CDCl}_3$ ):  $\delta = 13.7, 24.3, 37.4$  (d,  $J = 4.0$  Hz), 37.7, 53.6, 95.2 (d,  $J = 200.0$  Hz), 116.3, 121.5 (d,  $J = 7.0$  Hz), 126.8, 127.0, 127.3, 127.9, 128.6, 128.7, 132.4, 134.4, 134.6 (d,  $J = 12.0$  Hz), 136.2, 138.4, 142.8, 148.2, 165.7 (d,  $J = 26.0$  Hz), 168.0;  $^{19}\text{F}$  NMR (376 MHz,  $\text{CDCl}_3$ ):  $\delta = -158.9$ . HRMS (ESI-TOF). Calcd for  $\text{C}_{27}\text{H}_{28}\text{FN}_2\text{O}_5$ ,  $[\text{M}+\text{H}]^+$   $m/z$  479.1982, Found 479.1988.



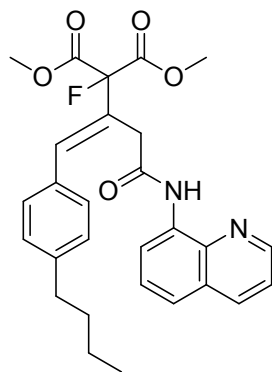

**(E)-dimethyl 2-(1-(4-butylphenyl)-4-oxo-4-(quinolin-8-ylamino)but-1-en-2-yl)-2-fluoromalonate 4h**

White solid. mp: 104-106 °C.  $^1\text{H}$  NMR (400 MHz,  $\text{CDCl}_3$ ):  $\delta$  = 0.88 (t,  $J$  = 7.2 Hz, 3H), 1.25-1.30 (m, 2H), 1.49-1.55 (m, 2H), 2.55 (t,  $J$  = 7.6 Hz, 2H), 3.77 (d,  $J$  = 1.2 Hz, 2H), 3.83 (s, 6H), 7.12 (d,  $J$  = 8.0 Hz, 2H), 7.25 (s, 1H), 7.34 (d,  $J$  = 8.0 Hz, 2H), 7.43 (dd,  $J_1$  = 4.0 Hz,  $J_2$  = 8.4 Hz, 1H), 7.48-7.53 (m, 2H), 8.14 (dd,  $J_1$  = 1.6 Hz,  $J_2$  = 8.4 Hz, 1H), 8.75 (dd,  $J_1$  = 2.4 Hz,  $J_2$  = 6.8 Hz, 1H), 8.77 (dd,  $J_1$  = 1.6 Hz,  $J_2$  = 4.0 Hz, 1H), 10.00 (s, 1H);  $^{13}\text{C}$  NMR (100 MHz,  $\text{CDCl}_3$ ):  $\delta$  = 13.9, 22.3, 33.4, 35.3, 37.4 (d,  $J$  = 4.0 Hz), 53.6, 95.2 (d,  $J$  = 200.0 Hz), 116.3, 121.5 (d,  $J$  = 7.0 Hz), 126.8, 127.0, 127.3, 127.9, 128.6, 128.7, 132.4, 134.4, 134.7 (d,  $J$  = 12.0 Hz), 136.2, 138.4, 143.1, 148.2, 165.7 (d,  $J$  = 26.0 Hz), 168.0;  $^{19}\text{F}$  NMR (376 MHz,  $\text{CDCl}_3$ ):  $\delta$  = -158.9. HRMS (ESI-TOF). Calcd for  $\text{C}_{28}\text{H}_{30}\text{FN}_2\text{O}_5$ ,  $[\text{M}+\text{H}]^+$   $m/z$  493.2139, Found 493.2133.

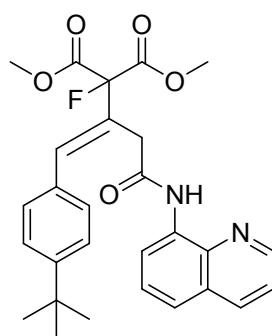

**(E)-dimethyl 2-(1-(4-(tert-butyl)phenyl)-4-oxo-4-(quinolin-8-ylamino)but-1-en-2-yl)-2-fluoromalonate 4i**

White solid. mp: 93-95 °C.  $^1\text{H}$  NMR (400 MHz,  $\text{CDCl}_3$ ):  $\delta$  = 1.25 (s, 9H), 3.77 (d,  $J$  = 1.2 Hz, 2H), 3.83 (s, 6H), 7.26 (s, 1H), 7.33 (d,  $J$  = 8.4 Hz, 2H), 7.37 (d,  $J$  = 8.4 Hz, 2H), 7.44 (dd,  $J_1$  = 4.4 Hz,  $J_2$  = 8.4 Hz, 1H), 7.48-7.54 (m, 2H), 8.14 (dd,  $J_1$  = 1.6 Hz,  $J_2$  = 8.4 Hz, 1H), 8.75 (dd,  $J_1$  = 2.4 Hz,

$J_2 = 6.4$  Hz, 1H), 8.78 (dd,  $J_1 = 1.6$  Hz,  $J_2 = 4.4$  Hz, 1H), 10.01 (s, 1H);  $^{13}\text{C}$  NMR (100 MHz,  $\text{CDCl}_3$ ):  $\delta = 31.2, 34.6, 37.5$  (d,  $J = 4.0$  Hz), 53.6, 95.2 (d,  $J = 201.0$  Hz), 116.3, 121.5 (d,  $J = 8.0$  Hz), 125.4, 126.9, 127.1, 127.3, 127.9, 128.5, 132.2, 134.4, 134.6 (d,  $J = 11.0$  Hz), 136.2, 138.4, 148.2, 151.2, 165.7 (d,  $J = 26.0$  Hz), 168.0;  $^{19}\text{F}$  NMR (376 MHz,  $\text{CDCl}_3$ ):  $\delta = -158.9$ . HRMS (ESI-TOF). Calcd for  $\text{C}_{28}\text{H}_{30}\text{FN}_2\text{O}_5$ ,  $[\text{M}+\text{H}]^+$   $m/z$  493.2139, Found 493.2133.

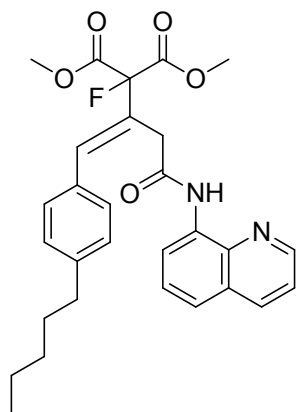

**(*E*)-dimethyl 2-fluoro-2-(4-oxo-1-(4-pentylphenyl)-4-(quinolin-8-ylamino)but-1-en-2-yl)malonate 4j**

White solid. mp: 105-106 °C.  $^1\text{H}$  NMR (400 MHz,  $\text{CDCl}_3$ ):  $\delta = 0.85$  (t,  $J = 7.2$  Hz, 3H), 1.26-1.32 (m, 4H), 1.51-1.58 (m, 2H), 2.54 (t,  $J = 7.6$  Hz, 2H), 3.77 (s, 2H), 3.83 (s, 6H), 7.12 (d,  $J = 8.0$  Hz, 2H), 7.25 (s, 1H), 7.34 (d,  $J = 8.0$  Hz, 2H), 7.43 (dd,  $J_1 = 4.0$  Hz,  $J_2 = 8.4$  Hz, 1H), 7.48-7.53 (m, 2H), 8.13 (dd,  $J_1 = 1.6$  Hz,  $J_2 = 8.4$  Hz, 1H), 8.74-8.78 (m, 2H), 10.00 (s, 1H);  $^{13}\text{C}$  NMR (100 MHz,  $\text{CDCl}_3$ ):  $\delta = 13.9, 22.4, 30.9, 31.4, 35.6, 37.4$  (d,  $J = 4.0$  Hz), 53.6, 95.2 (d,  $J = 200.0$  Hz), 116.3, 121.5 (d,  $J = 7.0$  Hz), 126.8, 127.0, 127.3, 127.9, 128.5, 128.7, 132.4, 134.4, 134.6 (d,  $J = 12.0$  Hz), 136.2, 138.4, 143.1, 148.1, 165.7 (d,  $J = 26.0$  Hz), 168.0;  $^{19}\text{F}$  NMR (376 MHz,  $\text{CDCl}_3$ ):  $\delta = -158.9$ . HRMS (ESI-TOF). Calcd for  $\text{C}_{29}\text{H}_{32}\text{FN}_2\text{O}_5$ ,  $[\text{M}+\text{H}]^+$   $m/z$  507.2295, Found 507.2285.

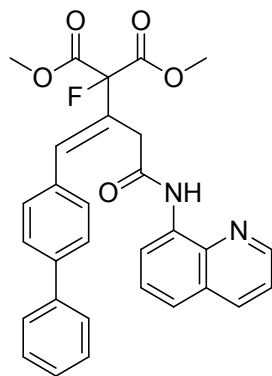

**(E)-dimethyl 2-(1-([1,1'-biphenyl]-4-yl)-4-oxo-4-(quinolin-8-ylamino)but-1-en-2-yl)-2-fluoromalonate 4k**

White solid. mp: 170-172 °C.  $^1\text{H}$  NMR (400 MHz,  $\text{CDCl}_3$ ):  $\delta$  = 3.82 (s, 2H), 3.85 (s, 6H), 7.29-7.32 (m, 2H), 7.38-7.44 (m, 3H), 7.48-7.56 (m, 8H), 8.13 (dd,  $J_1$  = 1.2 Hz,  $J_2$  = 8.4 Hz, 1H), 8.75-8.77 (m, 2H), 10.01 (s, 1H);  $^{13}\text{C}$  NMR (100 MHz,  $\text{CDCl}_3$ ):  $\delta$  = 37.4 (d,  $J$  = 4.0 Hz), 53.7, 95.1 (d,  $J$  = 201.0 Hz), 116.3, 121.6, 126.9, 127.1, 127.3, 127.4, 127.6, 127.8, 127.8, 128.7, 129.2, 134.1, 134.2, 134.3, 136.2, 138.4, 140.3, 140.8, 148.2, 165.7 (d,  $J$  = 26.0 Hz), 167.9;  $^{19}\text{F}$  NMR (376 MHz,  $\text{CDCl}_3$ ):  $\delta$  = -159.1. HRMS (ESI-TOF). Calcd for  $\text{C}_{30}\text{H}_{25}\text{FN}_2\text{O}_5\text{Na}$ ,  $[\text{M}+\text{Na}]^+$   $m/z$  535.1645, Found 535.1660.

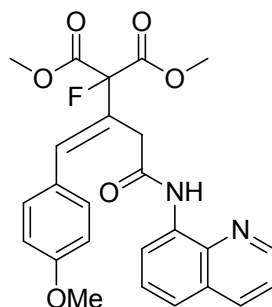

**(E)-dimethyl 2-fluoro-2-(1-(4-methoxyphenyl)-4-oxo-4-(quinolin-8-ylamino)but-1-en-2-yl)malonate 4l**

White solid. mp: 121-123 °C.  $^1\text{H}$  NMR (400 MHz,  $\text{CDCl}_3$ ):  $\delta$  = 3.75 (s, 3H), 3.76 (s, 2H), 3.83 (s, 6H), 6.84 (d,  $J$  = 8.8 Hz, 2H), 7.21 (s, 1H), 7.38-7.53 (m, 5H), 8.13 (dd,  $J_1$  = 1.2 Hz,  $J_2$  = 8.4 Hz, 1H), 8.74-8.78 (m, 2H), 10.02 (s, 1H);  $^{13}\text{C}$  NMR (100 MHz,  $\text{CDCl}_3$ ):  $\delta$  = 37.4 (d,  $J$  = 4.0 Hz), 53.6, 55.2, 95.3 (d,  $J$  = 200.0 Hz), 113.9, 116.3, 121.6 (d,  $J$  = 4.0 Hz), 125.8, 126.0, 127.3, 127.5, 127.9, 130.2, 134.2 (d,  $J$  = 12.0 Hz), 134.4, 136.2, 138.4, 148.2, 159.5, 165.8 (d,  $J$  = 26.0 Hz), 168.0;  $^{19}\text{F}$  NMR (376 MHz,  $\text{CDCl}_3$ ):  $\delta$  = -158.6. HRMS (ESI-TOF). Calcd for  $\text{C}_{25}\text{H}_{24}\text{FN}_2\text{O}_6$ ,  $[\text{M}+\text{H}]^+$   $m/z$

467.1618, Found 467.1618.

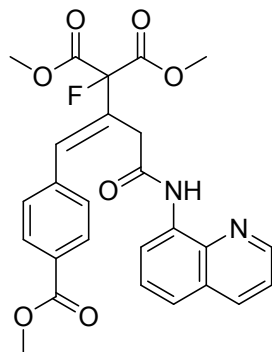

**(E)-dimethyl 2-fluoro-2-(1-(4-(methoxycarbonyl)phenyl)-4-oxo-4-(quinolin-8-ylamino)but-1-en-2-yl)malonate 4m**

White solid. mp: 121-123 °C.  $^1\text{H}$  NMR (400 MHz,  $\text{CDCl}_3$ ):  $\delta$  = 3.77 (d,  $J$  = 1.2 Hz, 2H), 3.85 (s, 6H), 3.87 (s, 3H), 7.32 (s, 1H), 7.44 (dd,  $J_1$  = 4.0 Hz,  $J_2$  = 8.4 Hz, 1H), 7.50-7.52 (m, 4H), 7.98 (d,  $J$  = 8.4 Hz, 2H), 8.14 (dd,  $J_1$  = 1.2 Hz,  $J_2$  = 8.4 Hz, 1H), 8.72 (dd,  $J_1$  = 3.2 Hz,  $J_2$  = 5.6 Hz, 1H), 8.77 (dd,  $J_1$  = 1.6 Hz,  $J_2$  = 4.4 Hz, 1H), 9.93 (s, 1H);  $^{13}\text{C}$  NMR (100 MHz,  $\text{CDCl}_3$ ):  $\delta$  = 37.1 (d,  $J$  = 4.0 Hz), 52.0, 53.7, 94.8 (d,  $J$  = 201.0 Hz), 113.9, 116.3, 121.6 (d,  $J$  = 3.0 Hz), 127.2, 127.8, 128.6, 129.3, 129.5, 129.7, 133.3 (d,  $J$  = 12.0 Hz), 134.1, 136.2, 138.2, 139.8, 148.1, 165.4 (d,  $J$  = 26.0 Hz), 166.5, 167.5;  $^{19}\text{F}$  NMR (376 MHz,  $\text{CDCl}_3$ ):  $\delta$  = -159.8. HRMS (ESI-TOF). Calcd for  $\text{C}_{26}\text{H}_{24}\text{FN}_2\text{O}_7$ ,  $[\text{M}+\text{H}]^+$   $m/z$  495.1568, Found 495.1572.

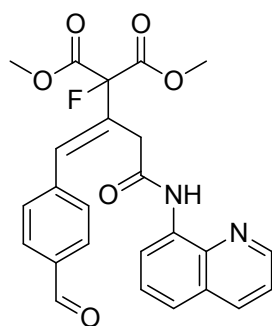

**(E)-dimethyl 2-fluoro-2-(1-(4-formylphenyl)-4-oxo-4-(quinolin-8-ylamino)but-1-en-2-yl)malonate 4n**

Colorless oil.  $^1\text{H}$  NMR (400 MHz,  $\text{CDCl}_3$ ):  $\delta$  = 3.77 (s, 2H), 3.85 (s, 6H), 7.33 (s, 1H), 7.46 (dd,  $J_1$  = 4.0 Hz,  $J_2$  = 8.4 Hz, 1H), 7.51-7.54 (m, 2H), 7.60 (d,  $J$  = 8.0 Hz, 2H), 7.83 (d,  $J$  = 8.0 Hz, 2H), 8.16 (dd,  $J_1$  = 1.2 Hz,  $J_2$  = 8.4 Hz, 1H), 8.71 (t,  $J$  = 4.4 Hz, 1H), 8.78 (dd,  $J_1$  = 1.2 Hz,  $J_2$  = 4.0 Hz,

1H), 9.92 (s, 1H), 9.95 (s, 1H); <sup>13</sup>C NMR (100 MHz, CDCl<sub>3</sub>): δ = 37.2, 53.8, 94.8 (d, *J* = 202.0 Hz), 116.4, 121.7 (d, *J* = 7.0 Hz), 127.3, 127.9, 129.3, 129.8, 129.9, 130.1, 133.1 (d, *J* = 12.0 Hz), 134.2, 135.7, 136.3, 138.3, 141.4, 148.2, 165.4 (d, *J* = 26.0 Hz), 167.4, 191.6; <sup>19</sup>F NMR (376 MHz, CDCl<sub>3</sub>): δ = -159.9. HRMS (ESI-TOF). Calcd for C<sub>25</sub>H<sub>22</sub>FN<sub>2</sub>O<sub>6</sub>, [M+H]<sup>+</sup> *m/z* 465.1462, Found 465.1462.

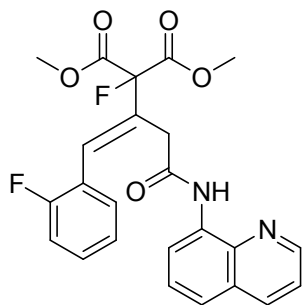

**(*E*)-dimethyl 2-fluoro-2-(1-(2-fluorophenyl)-4-oxo-4-(quinolin-8-ylamino)but-1-en-2-yl)malonate 4o**

Colorless oil. <sup>1</sup>H NMR (400 MHz, CDCl<sub>3</sub>): δ = 3.76 (d, *J* = 1.6 Hz, 2H), 3.84 (s, 6H), 7.02-7.08 (m, 2H), 7.22-7.29 (m, 2H), 7.42-7.58 (m, 4H), 8.13 (dd, *J*<sub>1</sub> = 1.2 Hz, *J*<sub>2</sub> = 8.4 Hz, 1H), 8.71 (dd, *J*<sub>1</sub> = 3.2 Hz, *J*<sub>2</sub> = 5.6 Hz, 1H), 8.78 (dd, *J*<sub>1</sub> = 1.2 Hz, *J*<sub>2</sub> = 4.4 Hz, 1H), 9.94 (s, 1H); <sup>13</sup>C NMR (100 MHz, CDCl<sub>3</sub>): δ = 37.4 (d, *J* = 4.0 Hz), 53.7, 94.9 (d, *J* = 202.0 Hz), 115.4 (d, *J* = 22.0 Hz), 116.3, 121.6 (d, *J* = 4.0 Hz), 122.9 (d, *J* = 14.0 Hz), 124.1 (d, *J* = 3.0 Hz), 127.2, 127.6 (d, *J* = 3.0 Hz), 127.7 (d, *J* = 3.0 Hz), 127.8, 129.8 (d, *J* = 21.0 Hz), 130.0, 130.1 (d, *J* = 2.0 Hz), 134.3, 136.2, 138.3, 148.1, 160.1 (d, *J* = 247.0 Hz), 165.5 (d, *J* = 25.0 Hz), 167.6; <sup>19</sup>F NMR (376 MHz, CDCl<sub>3</sub>): δ = -159.7, -113.6. HRMS (ESI-TOF). Calcd for C<sub>24</sub>H<sub>21</sub>F<sub>2</sub>N<sub>2</sub>O<sub>5</sub>, [M+H]<sup>+</sup> *m/z* 455.1419, Found 455.1441.

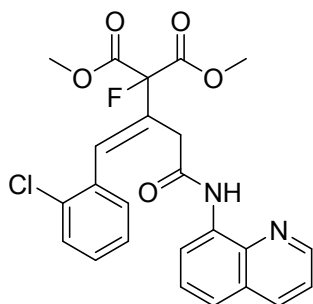

**(*E*)-dimethyl 2-(1-(2-chlorophenyl)-4-oxo-4-(quinolin-8-ylamino)but-1-en-2-yl)-2-fluoromalonate**

**fluoromalonate 4p**

Colorless oil.  $^1\text{H}$  NMR (400 MHz,  $\text{CDCl}_3$ ):  $\delta$  = 3.67 (d,  $J$  = 2.0 Hz, 2H), 3.86 (s, 6H), 7.18-7.26 (m, 2H), 7.31 (s, 1H), 7.36-7.39 (m, 1H), 7.44 (dd,  $J_1$  = 4.0 Hz,  $J_2$  = 8.4 Hz, 1H), 7.49-7.61 (m, 3H), 8.15 (dd,  $J_1$  = 1.6 Hz,  $J_2$  = 8.4 Hz, 1H), 8.71 (dd,  $J_1$  = 3.2 Hz,  $J_2$  = 6.0 Hz, 1H), 8.78 (dd,  $J_1$  = 1.6 Hz,  $J_2$  = 4.0 Hz, 1H), 9.88 (s, 1H);  $^{13}\text{C}$  NMR (100 MHz,  $\text{CDCl}_3$ ):  $\delta$  = 37.2 (d,  $J$  = 4.0 Hz), 53.7, 94.8 (d,  $J$  = 202.0 Hz), 116.3, 121.6 (d,  $J$  = 3.0 Hz), 126.8, 127.3, 127.9, 129.3, 129.4, 129.4, 129.6, 130.2, 132.2 (d,  $J$  = 11.0 Hz), 133.7, 133.8, 134.3, 136.2, 138.3, 148.2, 165.5 (d,  $J$  = 26.0 Hz), 167.7;  $^{19}\text{F}$  NMR (376 MHz,  $\text{CDCl}_3$ ):  $\delta$  = -160.2. HRMS (ESI-TOF). Calcd for  $\text{C}_{24}\text{H}_{21}\text{ClFN}_2\text{O}_5$ ,  $[\text{M}+\text{H}]^+$   $m/z$  471.1123, Found 471.1109.

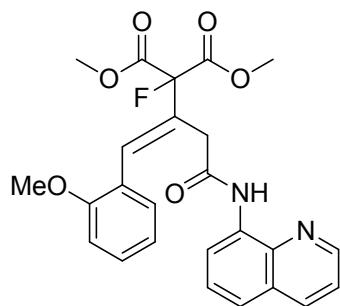**(E)-dimethyl 2-fluoro-2-(1-(2-methoxyphenyl)-4-oxo-4-(quinolin-8-ylamino)but-1-en-2-yl)malonate 4q**

White solid. mp: 128-130 °C.  $^1\text{H}$  NMR (400 MHz,  $\text{CDCl}_3$ ):  $\delta$  = 3.70 (s, 3H), 3.72 (d,  $J$  = 1.6 Hz, 2H), 3.85 (s, 6H), 6.81 (d,  $J$  = 8.0 Hz, 1H), 6.88 (d,  $J$  = 7.6 Hz, 1H), 7.22-7.24 (m, 1H), 7.31 (s, 1H), 7.43 (dd,  $J_1$  = 4.0 Hz,  $J_2$  = 8.4 Hz, 1H), 7.47-7.52 (m, 3H), 8.13 (dd,  $J_1$  = 1.6 Hz,  $J_2$  = 8.4 Hz, 1H), 8.71 (dd,  $J_1$  = 2.8 Hz,  $J_2$  = 6.0 Hz, 1H), 8.78 (dd,  $J_1$  = 1.6 Hz,  $J_2$  = 4.4 Hz, 1H), 9.95 (s, 1H);  $^{13}\text{C}$  NMR (100 MHz,  $\text{CDCl}_3$ ):  $\delta$  = 37.6 (d,  $J$  = 4.0 Hz), 53.6, 55.3, 95.2 (d,  $J$  = 200.0 Hz), 110.5, 116.3, 120.4, 121.4, 121.5, 124.0, 127.3, 127.5, 127.8, 129.6, 131.1 (d,  $J$  = 11.0 Hz), 134.4, 136.1, 138.4, 148.1, 157.2, 165.8 (d,  $J$  = 26.0 Hz), 168.3;  $^{19}\text{F}$  NMR (376 MHz,  $\text{CDCl}_3$ ):  $\delta$  = -159.0. HRMS (ESI-TOF). Calcd for  $\text{C}_{25}\text{H}_{24}\text{FN}_2\text{O}_6$ ,  $[\text{M}+\text{H}]^+$   $m/z$  467.1618, Found 467.1624.

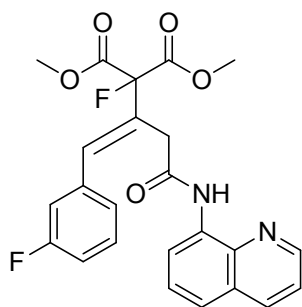

**(E)-dimethyl 2-fluoro-2-(1-(3-fluorophenyl)-4-oxo-4-(quinolin-8-ylamino)but-1-en-2-yl)malonate 4r**

White solid. mp: 131-133 °C.  $^1\text{H}$  NMR (400 MHz,  $\text{CDCl}_3$ ):  $\delta$  = 3.75 (d,  $J$  = 1.6 Hz, 2H), 3.84 (s, 6H), 6.94-6.98 (m, 1H), 7.16-7.31 (m, 4H), 7.45 (dd,  $J_1$  = 4.0 Hz,  $J_2$  = 8.4 Hz, 1H), 7.49-7.54 (m, 2H), 8.15 (dd,  $J_1$  = 1.2 Hz,  $J_2$  = 8.4 Hz, 1H), 8.73 (dd,  $J_1$  = 3.2 Hz,  $J_2$  = 6.0 Hz, 1H), 8.79 (dd,  $J_1$  = 1.2 Hz,  $J_2$  = 4.4 Hz, 1H), 9.93 (s, 1H);  $^{13}\text{C}$  NMR (100 MHz,  $\text{CDCl}_3$ ):  $\delta$  = 37.1 (d,  $J$  = 4.0 Hz), 53.7, 94.9 (d,  $J$  = 201.0 Hz), 115.0 (d,  $J$  = 21.0 Hz), 115.6 (d,  $J$  = 22.0 Hz), 116.3, 121.6, 124.4 (d,  $J$  = 3.0 Hz), 127.3, 127.9, 128.9 (d,  $J$  = 20.0 Hz), 130.0 (d,  $J$  = 9.0 Hz), 133.1 (d,  $J$  = 2.0 Hz), 133.3 (d,  $J$  = 2.0 Hz), 134.3, 136.2, 137.3 (d,  $J$  = 8.0 Hz), 138.3, 148.2, 162.7 (d,  $J$  = 245.0 Hz), 165.5 (d,  $J$  = 26.0 Hz), 167.6;  $^{19}\text{F}$  NMR (376 MHz,  $\text{CDCl}_3$ ):  $\delta$  = -159.7, -112.6. HRMS (ESI-TOF). Calcd for  $\text{C}_{24}\text{H}_{21}\text{F}_2\text{N}_2\text{O}_5$ ,  $[\text{M}+\text{H}]^+$   $m/z$  455.1419, Found 455.1404.

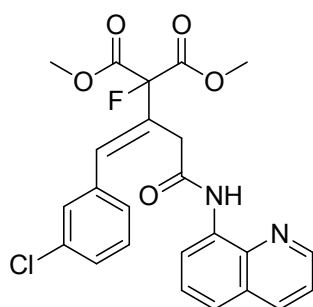

**(E)-dimethyl 2-(1-(3-chlorophenyl)-4-oxo-4-(quinolin-8-ylamino)but-1-en-2-yl)-2-fluoromalonate 4s**

White solid. mp: 103-105 °C.  $^1\text{H}$  NMR (400 MHz,  $\text{CDCl}_3$ ):  $\delta$  = 3.74 (d,  $J$  = 1.6 Hz, 2H), 3.84 (s, 6H), 7.23-7.24 (m, 3H), 7.35 (d,  $J$  = 5.6 Hz, 1H), 7.42-7.53 (m, 4H), 7.45 (dd,  $J_1$  = 4.0 Hz,  $J_2$  = 8.4 Hz, 1H), 7.49-7.54 (m, 2H), 8.14 (dd,  $J_1$  = 1.6 Hz,  $J_2$  = 8.4 Hz, 1H), 8.72 (dd,  $J_1$  = 3.2 Hz,  $J_2$  = 6.0 Hz, 1H), 8.79 (dd,  $J_1$  = 1.6 Hz,  $J_2$  = 4.0 Hz, 1H), 9.92 (s, 1H);  $^{13}\text{C}$  NMR (100 MHz,  $\text{CDCl}_3$ ):  $\delta$  = 37.1 (d,  $J$  = 4.0 Hz), 53.7, 94.8 (d,  $J$  = 202.0 Hz), 116.3, 121.6, 126.6, 127.2, 127.8, 128.1, 128.8,

129.0, 129.2, 129.8, 133.0 (d,  $J = 12.0$  Hz), 134.2, 134.3, 136.2, 136.9, 138.3, 148.2, 165.4 (d,  $J = 26.0$  Hz), 167.5;  $^{19}\text{F}$  NMR (376 MHz,  $\text{CDCl}_3$ ):  $\delta = -159.7$ . HRMS (ESI-TOF). Calcd for  $\text{C}_{24}\text{H}_{21}\text{ClFN}_2\text{O}_5$ ,  $[\text{M}+\text{H}]^+$   $m/z$  471.1123, Found 471.1136.

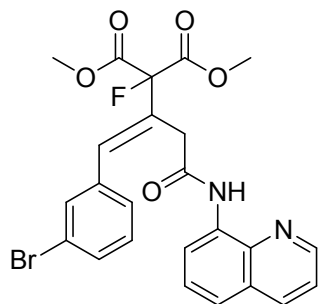

**(E)-dimethyl 2-(1-(3-bromophenyl)-4-oxo-4-(quinolin-8-ylamino)but-1-en-2-yl)-2-fluoromalonate 4t**

White solid. mp: 102-103 °C.  $^1\text{H}$  NMR (400 MHz,  $\text{CDCl}_3$ ):  $\delta = 3.74$  (s, 2H), 3.84 (s, 6H), 7.17 (t,  $J = 7.6$  Hz, 1H), 7.23 (s, 1H), 7.36-7.53 (m, 5H), 7.57 (s, 1H), 8.14 (d,  $J = 8.0$  Hz, 1H), 8.72 (dd,  $J_1 = 3.2$  Hz,  $J_2 = 5.6$  Hz, 1H), 8.79 (d,  $J = 2.8$  Hz, 1H), 9.92 (s, 1H);  $^{13}\text{C}$  NMR (100 MHz,  $\text{CDCl}_3$ ):  $\delta = 37.1$  (d,  $J = 4.0$  Hz), 53.7, 94.8 (d,  $J = 201.0$  Hz), 116.3, 121.6 (d,  $J = 2.0$  Hz), 122.5, 127.0, 127.2, 127.8, 129.1, 129.3, 130.0, 131.0, 131.7, 132.9 (d,  $J = 11.0$  Hz), 134.2, 136.2, 137.2, 138.3, 148.2, 165.4 (d,  $J = 26.0$  Hz), 167.5;  $^{19}\text{F}$  NMR (376 MHz,  $\text{CDCl}_3$ ):  $\delta = -159.7$ . HRMS (ESI-TOF). Calcd for  $\text{C}_{24}\text{H}_{21}\text{BrFN}_2\text{O}_5$ ,  $[\text{M}+\text{H}]^+$   $m/z$  515.0618, 517.0597, Found 515.0616, 517.0593.

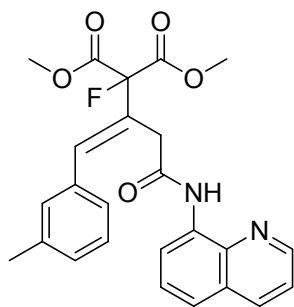

**(E)-dimethyl 2-fluoro-2-(4-oxo-4-(quinolin-8-ylamino)-1-(m-tolyl)but-1-en-2-yl)malonate 4u**

White solid. mp: 67-68 °C.  $^1\text{H}$  NMR (400 MHz,  $\text{CDCl}_3$ ):  $\delta = 2.25$  (s, 3H), 3.75 (d,  $J = 1.6$  Hz, 2H), 3.84 (s, 6H), 7.06 (d,  $J = 7.2$  Hz, 1H), 7.18-7.26 (m, 4H), 7.44 (dd,  $J_1 = 4.0$  Hz,  $J_2 = 8.4$  Hz, 1H), 8.48-8.54 (m, 2H), 8.15 (dd,  $J_1 = 1.6$  Hz,  $J_2 = 8.4$  Hz, 1H), 8.74 (dd,  $J_1 = 2.8$  Hz,  $J_2 = 6.4$  Hz, 1H), 8.79 (dd,  $J_1 = 1.6$  Hz,  $J_2 = 4.4$  Hz, 1H), 9.96 (s, 1H);  $^{13}\text{C}$  NMR (100 MHz,  $\text{CDCl}_3$ ):  $\delta = 21.3$ , 37.3



(d,  $J = 4.0$  Hz), 53.7, 95.2 (d,  $J = 201.0$  Hz), 116.3, 121.5 (d,  $J = 7.0$  Hz), 125.6, 127.3, 127.5, 127.7, 127.9, 128.4, 128.8, 129.5, 134.4, 134.7 (d,  $J = 11.0$  Hz), 135.1, 136.2, 138.1, 138.4, 148.1, 165.7 (d,  $J = 26.0$  Hz), 167.9;  $^{19}\text{F}$  NMR (376 MHz,  $\text{CDCl}_3$ ):  $\delta = -159.3$ . HRMS (ESI-TOF). Calcd for  $\text{C}_{25}\text{H}_{24}\text{FN}_2\text{O}_5$ ,  $[\text{M}+\text{H}]^+$   $m/z$  451.1669, Found 451.1681.

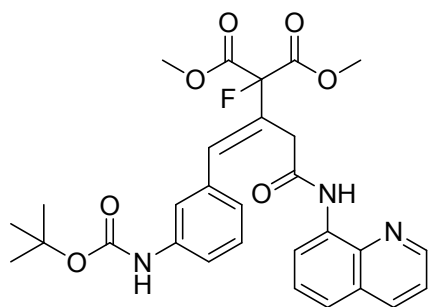

**(*E*)-dimethyl 2-(1-(3-((*tert*-butoxycarbonyl)amino)phenyl)-4-oxo-4-(quinolin-8-ylamino)but-1-en-2-yl)-2-fluoromalonate 4v**

White solid. mp: 117-119 °C.  $^1\text{H}$  NMR (400 MHz,  $\text{CDCl}_3$ ):  $\delta = 1.18$  (s, 9H), 3.76 (d,  $J = 1.2$  Hz, 2H), 3.84 (s, 6H), 7.17-7.27 (m, 2H), 7.33 (s, 1H), 7.43 (dd,  $J_1 = 4.0$  Hz,  $J_2 = 8.4$  Hz, 1H), 8.47-8.52 (m, 4H), 8.13 (dd,  $J_1 = 1.6$  Hz,  $J_2 = 8.0$  Hz, 1H), 8.71 (dd,  $J_1 = 4.0$  Hz,  $J_2 = 5.2$  Hz, 1H), 8.78 (dd,  $J_1 = 1.6$  Hz,  $J_2 = 4.0$  Hz, 1H), 9.94 (s, 1H);  $^{13}\text{C}$  NMR (100 MHz,  $\text{CDCl}_3$ ):  $\delta = 27.3$ , 37.1 (d,  $J = 4.0$  Hz), 39.4, 53.6, 95.0 (d,  $J = 201.0$  Hz), 116.2, 119.7, 120.3, 121.5 (d,  $J = 5.0$  Hz), 124.2, 127.2, 127.8, 128.1, 128.3, 129.1, 134.0 (d,  $J = 11.0$  Hz), 134.3, 135.8, 136.1, 138.1, 138.3, 148.2, 165.5 (d,  $J = 26.0$  Hz), 167.9, 176.5;  $^{19}\text{F}$  NMR (376 MHz,  $\text{CDCl}_3$ ):  $\delta = -159.4$ . HRMS (ESI-TOF). Calcd for  $\text{C}_{29}\text{H}_{31}\text{FN}_3\text{O}_7$ ,  $[\text{M}+\text{H}]^+$   $m/z$  552.2146, Found 552.2142.

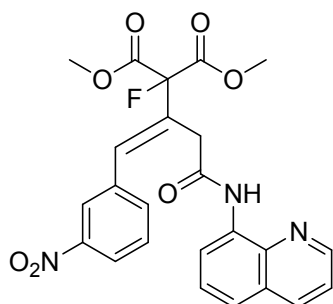

**(*E*)-dimethyl 2-fluoro-2-(1-(3-nitrophenyl)-4-oxo-4-(quinolin-8-ylamino)but-1-en-2-yl)malonate 4w**

White solid. mp: 131-133 °C.  $^1\text{H}$  NMR (400 MHz,  $\text{CDCl}_3$ ):  $\delta = 3.75$  (s, 2H), 3.86 (s, 6H), 7.33 (s,

1H), 7.43-7.50 (m, 4H), 7.82 (d,  $J = 7.6$  Hz, 1H), 8.08 (d,  $J = 8.0$  Hz, 1H), 8.15 (d,  $J = 8.0$  Hz, 1H), 8.29 (s, 1H), 8.70 (t,  $J_2 = 4.4$  Hz, 1H), 8.78 (d,  $J = 2.8$  Hz, 1H), 9.92 (s, 1H);  $^{13}\text{C}$  NMR (100 MHz,  $\text{CDCl}_3$ ):  $\delta = 37.0$  (d,  $J = 4.0$  Hz), 53.8, 94.6 (d,  $J = 203.0$  Hz), 116.3, 121.7 (d,  $J = 12.0$  Hz), 122.7, 123.7, 127.2, 127.8, 129.5, 130.4, 130.6, 131.8 (d,  $J = 12.0$  Hz), 134.0, 134.5, 136.2, 136.8, 138.1, 148.1, 148.2, 165.2 (d,  $J = 26.0$  Hz), 167.1;  $^{19}\text{F}$  NMR (376 MHz,  $\text{CDCl}_3$ ):  $\delta = -160.0$ . HRMS (ESI-TOF). Calcd for  $\text{C}_{24}\text{H}_{21}\text{FN}_3\text{O}_7$ ,  $[\text{M}+\text{H}]^+$   $m/z$  482.1364, Found 482.1355.

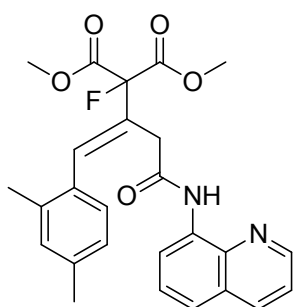

**(E)-dimethyl 2-(1-(2,4-dimethylphenyl)-4-oxo-4-(quinolin-8-ylamino)but-1-en-2-yl)-2-fluoromalonate 4x**

White solid. mp: 70-71 °C.  $^1\text{H}$  NMR (400 MHz,  $\text{CDCl}_3$ ):  $\delta = 2.25$  (s, 6H), 3.62 (d,  $J = 2.0$  Hz, 2H), 3.84 (s, 6H), 6.93 (d,  $J = 7.6$  Hz, 1H), 6.97 (s, 1H), 7.23 (s, 1H), 7.28 (d,  $J = 7.6$  Hz, 1H), 7.43 (dd,  $J_1 = 4.0$  Hz,  $J_2 = 8.4$  Hz, 1H), 7.46-7.52 (m, 2H), 8.13 (dd,  $J_1 = 1.6$  Hz,  $J_2 = 8.4$  Hz, 1H), 8.70 (dd,  $J_1 = 2.4$  Hz,  $J_2 = 6.4$  Hz, 1H), 8.77 (dd,  $J_1 = 1.6$  Hz,  $J_2 = 4.0$  Hz, 1H), 9.83 (s, 1H);  $^{13}\text{C}$  NMR (100 MHz,  $\text{CDCl}_3$ ):  $\delta = 19.6$ , 21.0, 37.1 (d,  $J = 4.0$  Hz), 53.6, 95.2 (d,  $J = 200.0$  Hz), 116.3, 121.5 (d,  $J = 13.0$  Hz), 126.5, 127.3, 127.9, 128.0, 128.2, 128.3, 130.8, 131.5, 134.4 (d,  $J = 9.0$  Hz), 136.2, 136.4, 137.9, 138.3, 148.0, 165.8 (d,  $J = 26.0$  Hz), 167.9;  $^{19}\text{F}$  NMR (376 MHz,  $\text{CDCl}_3$ ):  $\delta = -159.7$ . HRMS (ESI-TOF). Calcd for  $\text{C}_{26}\text{H}_{26}\text{FN}_2\text{O}_5$ ,  $[\text{M}+\text{H}]^+$   $m/z$  465.1826, Found 465.1820.

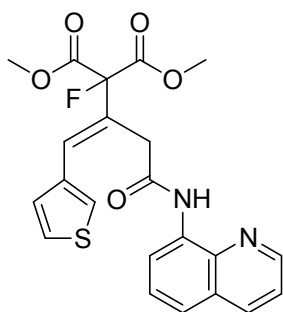

**(E)-dimethyl 2-fluoro-2-(4-oxo-4-(quinolin-8-ylamino)-1-(thiophen-3-yl)but-1-en-2-yl)-2-fluoromalonate**

**yl)malonate 4y**

Colorless oil.  $^1\text{H}$  NMR (400 MHz,  $\text{CDCl}_3$ ):  $\delta$  = 3.82 (s, 8H), 6.93 (dd,  $J_1$  = 0.8 Hz,  $J_2$  = 8.8 Hz, 1H), 7.21 (s, 1H), 7.26-7.28 (m, 1H), 7.42 (dd,  $J_1$  = 4.0 Hz,  $J_2$  = 8.4 Hz, 1H), 7.47-7.53 (m, 3H), 8.12 (dd,  $J_1$  = 1.6 Hz,  $J_2$  = 8.4 Hz, 1H), 8.75-8.76 (m, 2H), 10.08 (s, 1H);  $^{13}\text{C}$  NMR (100 MHz,  $\text{CDCl}_3$ ):  $\delta$  = 37.8 (d,  $J$  = 4.0 Hz), 53.6, 95.2 (d,  $J$  = 201.0 Hz), 116.3, 121.6 (d,  $J$  = 5.0 Hz), 125.6, 125.8, 126.0, 126.2, 127.2, 127.8, 128.4, 128.7 (d,  $J$  = 12.0 Hz), 134.3, 135.8, 136.1, 138.4, 148.2, 165.6 (d,  $J$  = 26.0 Hz), 167.7;  $^{19}\text{F}$  NMR (376 MHz,  $\text{CDCl}_3$ ):  $\delta$  = -158.3. HRMS (ESI-TOF). Calcd for  $\text{C}_{22}\text{H}_{20}\text{FN}_2\text{O}_5\text{S}$ ,  $[\text{M}+\text{H}]^+$   $m/z$  443.1077, Found 443.1098.

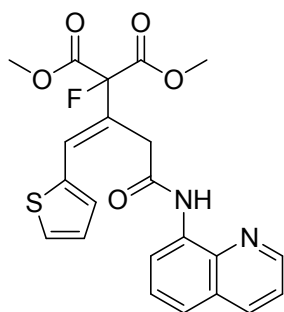**(E)-dimethyl 2-fluoro-2-(4-oxo-4-(quinolin-8-ylamino)-1-(thiophen-2-yl)but-1-en-2-yl)malonate 4z**

Colorless oil.  $^1\text{H}$  NMR (400 MHz,  $\text{CDCl}_3$ ):  $\delta$  = 3.82 (s, 6H), 3.97 (s, 2H), 6.99 (dd,  $J_1$  = 3.6 Hz,  $J_2$  = 4.8 Hz, 1H), 7.25 (d,  $J$  = 3.2 Hz, 1H), 7.30 (d,  $J$  = 5.2 Hz, 1H), 7.39-7.41 (m, 2H), 7.45-7.51 (m, 2H), 8.10 (dd,  $J_1$  = 1.2 Hz,  $J_2$  = 8.4 Hz, 1H), 8.72-8.75 (m, 2H), 10.12 (s, 1H);  $^{13}\text{C}$  NMR (100 MHz,  $\text{CDCl}_3$ ):  $\delta$  = 38.0 (d,  $J$  = 3.0 Hz), 53.7, 95.1 (d,  $J$  = 202.0 Hz), 116.3, 121.5, 124.0, 124.2, 126.7, 126.8, 127.2, 127.7, 127.8, 130.4, 134.3, 136.1, 137.4, 138.4, 148.2, 165.5 (d,  $J$  = 26.0 Hz), 166.8;  $^{19}\text{F}$  NMR (376 MHz,  $\text{CDCl}_3$ ):  $\delta$  = -158.3. HRMS (ESI-TOF). Calcd for  $\text{C}_{22}\text{H}_{20}\text{FN}_2\text{O}_5\text{S}$ ,  $[\text{M}+\text{H}]^+$   $m/z$  443.1077, Found 443.1087.

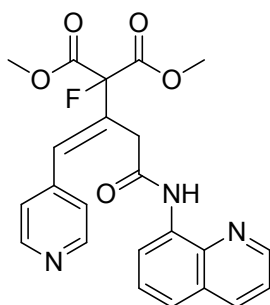

**(E)-dimethyl 2-fluoro-2-(4-oxo-1-(pyridin-4-yl)-4-(quinolin-8-ylamino)but-1-en-2-yl)malonate 4aa**

White solid. mp: 102-103 °C. <sup>1</sup>H NMR (400 MHz, CDCl<sub>3</sub>): δ = 3.74 (d, *J* = 1.6 Hz, 2H), 3.84 (s, 6H), 7.22 (s, 1H), 7.34 (d, *J* = 6.0 Hz, 2H), 7.46 (dd, *J*<sub>1</sub> = 4.4 Hz, *J*<sub>2</sub> = 8.4 Hz, 1H), 7.51-7.55 (m, 2H), 8.16 (dd, *J*<sub>1</sub> = 1.6 Hz, *J*<sub>2</sub> = 7.6 Hz, 1H), 8.56 (dd, *J*<sub>1</sub> = 1.6 Hz, *J*<sub>2</sub> = 4.8 Hz, 2H), 8.71 (t, *J* = 4.4 Hz, 1H), 8.79 (dd, *J*<sub>1</sub> = 1.6 Hz, *J*<sub>2</sub> = 4.4 Hz, 1H), 9.92 (s, 1H); <sup>13</sup>C NMR (100 MHz, CDCl<sub>3</sub>): δ = 37.1 (d, *J* = 4.0 Hz), 53.8, 94.6 (d, *J* = 203.0 Hz), 116.4, 121.8 (d, *J* = 9.0 Hz), 123.2, 127.3, 127.9, 130.9, 131.1, 131.6 (d, *J* = 12.0 Hz), 134.1, 136.3, 138.3, 143.1, 148.3, 150.0, 165.3 (d, *J* = 26.0 Hz), 167.3; <sup>19</sup>F NMR (376 MHz, CDCl<sub>3</sub>): δ = -160.2. HRMS (ESI-TOF). Calcd for C<sub>23</sub>H<sub>21</sub>FN<sub>3</sub>O<sub>5</sub>, [M+H]<sup>+</sup> *m/z* 438.1465, Found 438.1449.

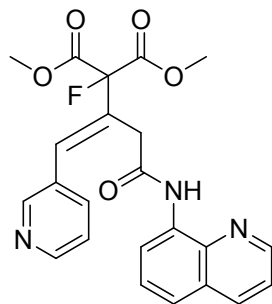

**(E)-dimethyl 2-fluoro-2-(4-oxo-1-(pyridin-3-yl)-4-(quinolin-8-ylamino)but-1-en-2-yl)malonate 4ab**

White solid. mp: 108-110 °C. <sup>1</sup>H NMR (400 MHz, CDCl<sub>3</sub>): δ = 3.76 (d, *J* = 1.6 Hz, 2H), 3.84 (s, 6H), 7.24-7.27 (m, 2H), 7.44 (dd, *J*<sub>1</sub> = 4.0 Hz, *J*<sub>2</sub> = 8.4 Hz, 1H), 7.50-7.51 (m, 2H), 7.83 (d, *J* = 7.6 Hz, 1H), 8.15 (dd, *J*<sub>1</sub> = 1.2 Hz, *J*<sub>2</sub> = 8.0 Hz, 1H), 8.50 (d, *J* = 4.0 Hz, 1H), 8.66 (s, 1H), 8.71 (t, *J* = 4.4 Hz, 1H), 8.78 (dd, *J*<sub>1</sub> = 1.6 Hz, *J*<sub>2</sub> = 4.0 Hz, 1H), 9.95 (s, 1H); <sup>13</sup>C NMR (100 MHz, CDCl<sub>3</sub>): δ = 37.1 (d, *J* = 4.0 Hz), 53.8, 94.7 (d, *J* = 202.0 Hz), 116.3, 121.7 (d, *J* = 7.0 Hz), 123.3, 127.2, 127.8, 129.9, 130.1, 130.7 (d, *J* = 12.0 Hz), 131.0, 134.1, 135.8, 136.3, 138.2, 148.2, 149.1, 149.8, 165.3 (d, *J* = 25.0 Hz), 167.3; <sup>19</sup>F NMR (376 MHz, CDCl<sub>3</sub>): δ = -159.8. HRMS (ESI-TOF). Calcd for C<sub>23</sub>H<sub>21</sub>FN<sub>3</sub>O<sub>5</sub>, [M+H]<sup>+</sup> *m/z* 438.1465, Found 438.1481.

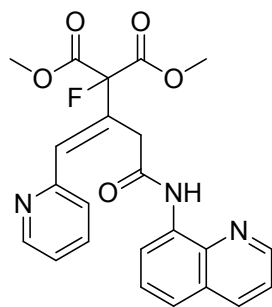

**(E)-dimethyl 2-fluoro-2-(4-oxo-1-(pyridin-2-yl)-4-(quinolin-8-ylamino)but-1-en-2-yl)malonate 4ac**

White solid. mp: 165-167 °C.  $^1\text{H}$  NMR (400 MHz,  $\text{CDCl}_3$ ):  $\delta$  = 3.87 (s, 6H), 4.26 (s, 2H), 6.99 (s, 1H), 7.23-7.26 (m, 1H), 7.33 (d,  $J$  = 8.0 Hz, 1H), 7.38 (dd,  $J_1$  = 4.0 Hz,  $J_2$  = 8.4 Hz, 1H), 7.43-7.51 (m, 2H), 7.71 (dt,  $J_1$  = 1.6 Hz,  $J_2$  = 7.6 Hz, 1H), 8.10 (dd,  $J_1$  = 1.6 Hz,  $J_2$  = 8.4 Hz, 1H), 8.66 (dd,  $J_1$  = 1.6 Hz,  $J_2$  = 4.4 Hz, 1H), 8.76 (dd,  $J_1$  = 1.2 Hz,  $J_2$  = 7.2 Hz, 1H), 8.88 (d,  $J$  = 4.0 Hz, 1H), 11.39 (s, 1H);  $^{13}\text{C}$  NMR (100 MHz,  $\text{CDCl}_3$ ):  $\delta$  = 37.6 (d,  $J$  = 3.0 Hz), 53.7, 95.4 (d,  $J$  = 200.0 Hz), 116.9, 121.2 (d,  $J$  = 5.0 Hz), 122.6, 126.0, 127.3, 128.0, 130.1 (d,  $J$  = 11.0 Hz), 132.4, 132.6, 135.6, 136.0, 136.7, 138.9, 147.7, 149.5, 153.8, 165.5 (d,  $J$  = 26.0 Hz), 168.6;  $^{19}\text{F}$  NMR (376 MHz,  $\text{CDCl}_3$ ):  $\delta$  = -157.3. HRMS (ESI-TOF). Calcd for  $\text{C}_{23}\text{H}_{20}\text{FN}_3\text{O}_5\text{Na}$ ,  $[\text{M}+\text{Na}]^+$   $m/z$  460.1285, Found 460.1284.

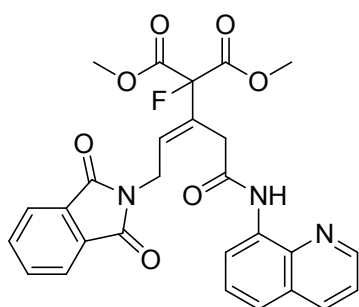

**(E)-dimethyl 2-(1-(1,3-dioxoisindolin-2-yl)-5-oxo-5-(quinolin-8-ylamino)pent-2-en-3-yl)-2-fluoromalonate 4ad**

Pale yellow oil.  $^1\text{H}$  NMR (400 MHz,  $\text{CDCl}_3$ ):  $\delta$  = 3.78 (s, 6H), 3.90 (s, 2H), 4.57 (d,  $J$  = 7.2 Hz, 2H), 6.34 (t,  $J$  = 7.2 Hz, 1H), 7.43 (dd,  $J_1$  = 4.0 Hz,  $J_2$  = 8.4 Hz, 1H), 7.48-7.52 (m, 2H), 7.66 (dd,  $J_1$  = 3.2 Hz,  $J_2$  = 5.2 Hz, 2H), 7.76 (dd,  $J_1$  = 3.2 Hz,  $J_2$  = 5.2 Hz, 2H), 8.13 (dd,  $J_1$  = 1.2 Hz,  $J_2$  = 8.4 Hz, 1H), 8.70 (dd,  $J_1$  = 2.8 Hz,  $J_2$  = 6.0 Hz, 1H), 8.80 (dd,  $J_1$  = 1.2 Hz,  $J_2$  = 4.0 Hz, 1H), 10.00 (s, 1H);  $^{13}\text{C}$  NMR (100 MHz,  $\text{CDCl}_3$ ):  $\delta$  = 35.4, 36.4 (d,  $J$  = 3.0 Hz), 53.6, 94.6 (d,  $J$  = 201.0 Hz),

116.3, 121.6, 123.2, 127.2, 127.8, 128.8 (d,  $J = 11.0$  Hz), 130.0, 130.2, 132.0, 133.9, 134.2, 136.2, 138.3, 148.3, 165.2 (d,  $J = 26.0$  Hz), 166.9, 167.6;  $^{19}\text{F}$  NMR (376 MHz,  $\text{CDCl}_3$ ):  $\delta = -159.2$ . HRMS (ESI-TOF). Calcd for  $\text{C}_{27}\text{H}_{23}\text{FN}_3\text{O}_7$ ,  $[\text{M}+\text{H}]^+$   $m/z$  520.1520, Found 520.1545.

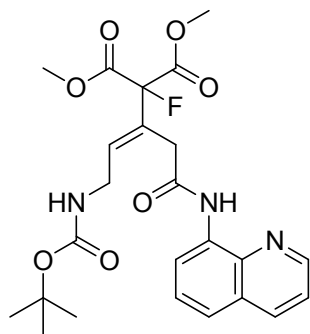

**(*E*)-dimethyl 2-(1-(3,3-dimethylbutanamido)-5-oxo-5-(quinolin-8-ylamino)pent-2-en-3-yl)-2-fluoromalonate 4ae**

Colorless oil.  $^1\text{H}$  NMR (400 MHz,  $\text{CDCl}_3$ ):  $\delta = 1.43$  (s, 9H), 3.64 (s, 2H), 3.79 (s, 6H), 4.02 (s, 2H), 5.63 (s, 1H), 6.28 (t,  $J = 7.2$  Hz, 1H), 7.46 (dd,  $J_1 = 4.4$  Hz,  $J_2 = 8.4$  Hz, 1H), 7.52 (d,  $J = 4.4$  Hz, 2H), 8.16-8.18 (m, 1H), 8.72 (t,  $J = 4.4$  Hz, 1H), 8.87 (d,  $J = 3.2$  Hz, 1H), 9.88 (s, 1H);  $^{13}\text{C}$  NMR (100 MHz,  $\text{CDCl}_3$ ):  $\delta = 28.3$ , 36.1, 38.3, 53.6, 79.4, 94.7 (d,  $J = 198.0$  Hz), 116.7, 121.6, 121.9, 127.2, 127.9, 128.2 (d,  $J = 18.0$  Hz), 132.5 (d,  $J = 11.0$  Hz), 133.9, 136.5, 138.3, 148.5, 155.7, 165.3 (d,  $J = 26.0$  Hz), 166.7;  $^{19}\text{F}$  NMR (376 MHz,  $\text{CDCl}_3$ ):  $\delta = -158.6$ . HRMS (ESI-TOF). Calcd for  $\text{C}_{24}\text{H}_{29}\text{FN}_3\text{O}_7$ ,  $[\text{M}+\text{H}]^+$   $m/z$  490.1990, Found 490.1996.

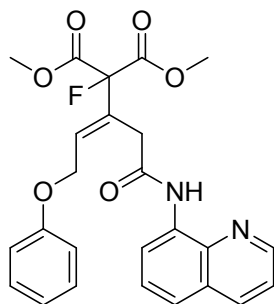

**(*E*)-dimethyl 2-fluoro-2-(5-oxo-1-phenoxy-5-(quinolin-8-ylamino)pent-2-en-3-yl)malonate 4af**

White solid. mp: 118-120 °C.  $^1\text{H}$  NMR (400 MHz,  $\text{CDCl}_3$ ):  $\delta = 3.67$  (s, 2H), 3.81 (s, 6H), 4.85 (dd,  $J_1 = 1.6$  Hz,  $J_2 = 5.6$  Hz, 2H), 6.51 (t,  $J = 5.6$  Hz, 1H), 6.89-6.94 (m, 3H), 7.21-7.26 (m, 2H), 7.45

(dd,  $J_1 = 4.0$  Hz,  $J_2 = 8.4$  Hz, 1H), 7.50-7.52 (m, 2H), 8.16 (dd,  $J_1 = 1.2$  Hz,  $J_2 = 8.4$  Hz, 1H), 8.72 (dd,  $J_1 = 4.0$  Hz,  $J_2 = 5.2$  Hz, 1H), 8.80 (dd,  $J_1 = 1.2$  Hz,  $J_2 = 4.0$  Hz, 1H), 10.01 (s, 1H);  $^{13}\text{C}$  NMR (100 MHz,  $\text{CDCl}_3$ ):  $\delta = 37.0$  (d,  $J = 3.0$  Hz), 53.7, 64.7, 94.7 (d,  $J = 201.0$  Hz), 114.7, 116.4, 121.1, 121.7 (d,  $J = 12.0$  Hz), 127.3, 127.9, 128.0, 128.2, 129.4, 131.8 (d,  $J = 12.0$  Hz), 134.2, 136.3, 138.4, 148.3, 158.2, 165.3 (d,  $J = 25.0$  Hz), 166.8;  $^{19}\text{F}$  NMR (376 MHz,  $\text{CDCl}_3$ ):  $\delta = -159.0$ . HRMS (ESI-TOF). Calcd for  $\text{C}_{25}\text{H}_{24}\text{FN}_2\text{O}_6$ ,  $[\text{M}+\text{H}]^+$   $m/z$  467.1618, Found 467.1612.

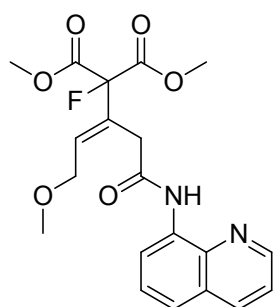

**(E)-dimethyl 2-fluoro-2-(1-methoxy-5-oxo-5-(quinolin-8-ylamino)pent-2-en-3-yl)malonate**  
**4ag**

Colorless oil.  $^1\text{H}$  NMR (400 MHz,  $\text{CDCl}_3$ ):  $\delta = 3.36$  (s, 3H), 3.62 (s, 2H), 3.81 (s, 6H), 4.25 (dd,  $J_1 = 2.0$  Hz,  $J_2 = 6.0$  Hz, 2H), 6.34 (t,  $J = 2.0$  Hz, 1H), 7.45 (dd,  $J_1 = 4.0$  Hz,  $J_2 = 8.4$  Hz, 1H), 7.50-7.52 (m, 2H), 8.15 (dd,  $J_1 = 1.2$  Hz,  $J_2 = 8.4$  Hz, 1H), 8.72 (dd,  $J_1 = 3.6$  Hz,  $J_2 = 5.2$  Hz, 1H), 8.81 (dd,  $J_1 = 1.2$  Hz,  $J_2 = 4.0$  Hz, 1H), 10.02 (s, 1H);  $^{13}\text{C}$  NMR (100 MHz,  $\text{CDCl}_3$ ):  $\delta = 36.9$  (d,  $J = 3.0$  Hz), 53.6, 58.5, 69.0, 94.8 (d,  $J = 200.0$  Hz), 116.4, 121.6, 121.7, 127.2, 127.9, 128.0, 132.9 (d,  $J = 11.0$  Hz), 134.3, 136.2, 138.4, 148.2, 165.4 (d,  $J = 26.0$  Hz), 167.0;  $^{19}\text{F}$  NMR (376 MHz,  $\text{CDCl}_3$ ):  $\delta = -158.6$ . HRMS (ESI-TOF). Calcd for  $\text{C}_{20}\text{H}_{21}\text{FN}_2\text{O}_6\text{Na}$ ,  $[\text{M}+\text{Na}]^+$   $m/z$  427.1281, Found 427.1272.

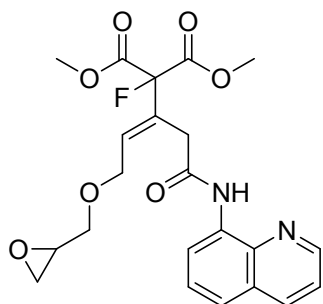

**(E)-dimethyl 2-fluoro-2-(1-(oxiran-2-ylmethoxy)-5-oxo-5-(quinolin-8-ylamino)pent-2-en-3-yl)malonate**

**yl)malonate 4ah**

Colorless oil.  $^1\text{H}$  NMR (400 MHz,  $\text{CDCl}_3$ ):  $\delta$  = 2.54 (dd,  $J_1$  = 2.4 Hz,  $J_2$  = 5.2 Hz, 1H), 2.71 (t,  $J$  = 4.8 Hz, 1H), 3.09-3.11 (m, 1H), 3.38 (dd,  $J_1$  = 6.0 Hz,  $J_2$  = 11.6 Hz, 1H), 3.60 (s, 2H), 3.74 (dd,  $J_1$  = 2.8 Hz,  $J_2$  = 11.6 Hz, 1H), 3.79 (s, 6H), 4.30-4.40 (m, 2H), 6.33 (t,  $J$  = 6.0 Hz, 1H), 7.42-7.49 (m, 3H), 8.13 (dd,  $J_1$  = 1.6 Hz,  $J_2$  = 8.4 Hz, 1H), 8.69 (t,  $J$  = 4.8 Hz, 1H), 8.79 (dd,  $J_1$  = 1.2 Hz,  $J_2$  = 4.0 Hz, 1H), 9.97 (s, 1H);  $^{13}\text{C}$  NMR (100 MHz,  $\text{CDCl}_3$ ):  $\delta$  = 36.8 (d,  $J$  = 3.0 Hz), 44.1, 50.5, 53.6, 67.7, 71.2, 94.7 (d,  $J$  = 200.0 Hz), 116.3, 121.6 (d,  $J$  = 5.0 Hz), 127.2, 127.8, 127.9, 128.1, 132.6 (d,  $J$  = 11.0 Hz), 134.2, 136.2, 138.3, 148.2, 165.3 (d,  $J$  = 25.0 Hz), 167.0;  $^{19}\text{F}$  NMR (376 MHz,  $\text{CDCl}_3$ ):  $\delta$  = -158.8. HRMS (ESI-TOF). Calcd for  $\text{C}_{22}\text{H}_{24}\text{FN}_2\text{O}_7$ ,  $[\text{M}+\text{H}]^+$   $m/z$  447.1568, Found 447.1561.

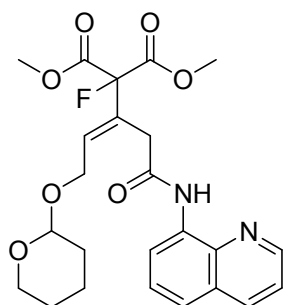**(E)-dimethyl 2-fluoro-2-(5-oxo-5-(quinolin-8-ylamino)-1-((tetrahydro-2H-pyran-2-yl)oxy)pent-2-en-3-yl)malonate 4ai**

Colorless oil.  $^1\text{H}$  NMR (400 MHz,  $\text{CDCl}_3$ ):  $\delta$  = 1.42-1.75 (m, 6H), 3.41-3.44 (m, 1H), 3.57-3.78 (m, 9H), 4.30-4.34 (m, 1H), 4.48-4.53 (m, 1H), 4.62 (t,  $J$  = 3.6 Hz, 1H), 6.37 (t,  $J$  = 6.0 Hz, 1H), 7.41-7.50 (m, 3H), 8.12 (dd,  $J_1$  = 1.6 Hz,  $J_2$  = 8.4 Hz, 1H), 8.69 (dd,  $J_1$  = 3.6 Hz,  $J_2$  = 5.6 Hz, 1H), 8.78 (dd,  $J_1$  = 1.6 Hz,  $J_2$  = 4.4 Hz, 1H), 9.97 (s, 1H);  $^{13}\text{C}$  NMR (100 MHz,  $\text{CDCl}_3$ ):  $\delta$  = 19.1, 25.2, 30.3, 36.8 (d,  $J$  = 3.0 Hz), 53.5, 61.9, 63.5, 94.8 (d,  $J$  = 200.0 Hz), 98.0, 116.2, 121.6, 127.2, 127.6, 127.8, 132.7 (d,  $J$  = 11.0 Hz), 134.2, 136.2, 138.3, 148.2, 165.4 (d,  $J$  = 26.0 Hz), 167.0;  $^{19}\text{F}$  NMR (376 MHz,  $\text{CDCl}_3$ ):  $\delta$  = -158.8. HRMS (ESI-TOF). Calcd for  $\text{C}_{24}\text{H}_{27}\text{FN}_2\text{O}_7\text{Na}$ ,  $[\text{M}+\text{Na}]^+$   $m/z$  497.1700, Found 497.1700.



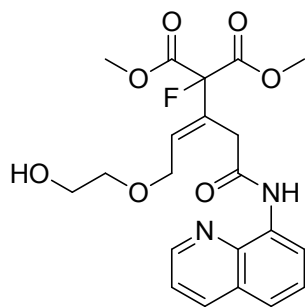

**(E)-dimethyl 2-fluoro-2-(1-(2-hydroxyethoxy)-5-oxo-5-(quinolin-8-ylamino)pent-2-en-3-yl)malonate 4aj**

Colorless oil.  $^1\text{H}$  NMR (400 MHz,  $\text{CDCl}_3$ ):  $\delta$  = 2.69 (s, 1H), 3.53-3.56 (m, 2H), 3.62 (s, 2H), 3.67-3.79 (m, 8H), 4.31 (d,  $J$  = 4.4 Hz, 2H), 6.33 (t,  $J$  = 6.0 Hz, 1H), 7.43 (dd,  $J_1$  = 4.4 Hz,  $J_2$  = 8.4 Hz, 1H), 7.48-7.52 (m, 2H), 8.13-8.15 (m, 1H), 8.68-8.79 (m, 2H), 10.00 (s, 1H);  $^{13}\text{C}$  NMR (100 MHz,  $\text{CDCl}_3$ ):  $\delta$  = 36.9 (d,  $J$  = 4.0 Hz), 53.6, 61.6, 67.6, 72.1, 94.9 (d,  $J$  = 200.0 Hz), 116.5, 121.7 (d,  $J$  = 16.0 Hz), 127.2, 127.9, 128.1, 128.3, 132.3 (d,  $J$  = 11.0 Hz), 134.2, 136.3, 138.4, 148.3, 165.4 (d,  $J$  = 26.0 Hz), 167.4;  $^{19}\text{F}$  NMR (376 MHz,  $\text{CDCl}_3$ ):  $\delta$  = -158.5. HRMS (ESI-TOF). Calcd for  $\text{C}_{21}\text{H}_{24}\text{FN}_2\text{O}_7$ ,  $[\text{M}+\text{H}]^+$   $m/z$  435.1568, Found 435.1584.

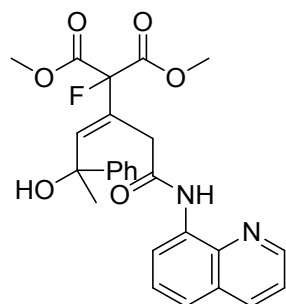

**(E)-dimethyl 2-fluoro-2-(5-hydroxy-1-oxo-5-phenyl-1-(quinolin-8-ylamino)hex-3-en-3-yl)malonate 4ak**

White solid. mp: 96-98 °C.  $^1\text{H}$  NMR (400 MHz,  $\text{CDCl}_3$ ):  $\delta$  = 1.74 (s, 3H), 3.41 (d,  $J$  = 15.2 Hz, 1H), 3.61 (dd,  $J_1$  = 2.0 Hz,  $J_2$  = 15.2 Hz, 1H), 3.77 (d,  $J$  = 13.6 Hz, 6H), 5.49 (s, 1H), 6.61 (s, 1H), 7.23 (t,  $J$  = 7.2 Hz, 1H), 7.32 (t,  $J$  = 7.2 Hz, 2H), 7.45 (dd,  $J_1$  = 4.0 Hz,  $J_2$  = 8.4 Hz, 1H), 7.52-7.55 (m, 4H), 8.16 (dd,  $J_1$  = 1.2 Hz,  $J_2$  = 8.4 Hz, 1H), 8.69 (t,  $J$  = 4.4 Hz, 1H), 8.77 (dd,  $J_1$  = 1.2 Hz,  $J_2$  = 4.4 Hz, 1H), 9.92 (s, 1H);  $^{13}\text{C}$  NMR (100 MHz,  $\text{CDCl}_3$ ):  $\delta$  = 33.2, 36.5 (d,  $J$  = 4.0 Hz), 53.6, 73.4, 95.4 (d,  $J$  = 200.0 Hz), 117.0, 121.7, 122.1, 125.1, 126.7, 126.9 (d,  $J$  = 4.0 Hz), 127.3, 127.9, 128.3, 133.9, 136.4, 138.4, 142.5 (d,  $J$  = 10.0 Hz), 147.3, 148.4, 165.6 (d,  $J$  = 26.0 Hz), 169.4;  $^{19}\text{F}$

NMR (376 MHz, CDCl<sub>3</sub>):  $\delta$  = -157.5. HRMS (ESI-TOF). Calcd for C<sub>26</sub>H<sub>25</sub>FN<sub>2</sub>O<sub>6</sub>Na, [M+Na]<sup>+</sup>  $m/z$  503.1594, Found 503.1597.

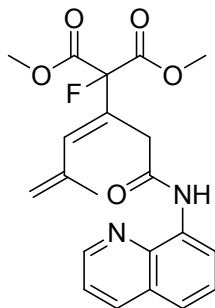

**(E)-dimethyl 2-fluoro-2-(5-methyl-1-oxo-1-(quinolin-8-ylamino)hexa-3,5-dien-3-yl)malonate 4al**

Colorless oil. <sup>1</sup>H NMR (400 MHz, CDCl<sub>3</sub>):  $\delta$  = 1.89 (s, 3H), 3.77 (d,  $J$  = 1.2 Hz, 2H), 3.80 (s, 6H), 5.11 (s, 1H), 5.17 (s, 1H), 6.63 (s, 1H), 7.44 (dd,  $J_1$  = 4.4 Hz,  $J_2$  = 8.4 Hz, 1H), 7.48-7.53 (m, 2H), 8.14 (dd,  $J_1$  = 1.6 Hz,  $J_2$  = 8.4 Hz, 1H), 8.73 (dd,  $J_1$  = 2.4 Hz,  $J_2$  = 6.4 Hz, 1H), 8.79 (dd,  $J_1$  = 1.6 Hz,  $J_2$  = 4.0 Hz, 1H), 9.97 (s, 1H); <sup>13</sup>C NMR (100 MHz, CDCl<sub>3</sub>):  $\delta$  = 22.8, 37.2 (d,  $J$  = 4.0 Hz), 53.6, 95.1 (d,  $J$  = 201.0 Hz), 116.3, 117.7, 121.5, 121.6, 126.0, 126.2, 127.3, 127.9, 134.4, 136.2 (d,  $J$  = 12.0 Hz), 138.4, 139.8, 148.2, 165.7 (d,  $J$  = 26.0 Hz), 167.9; <sup>19</sup>F NMR (376 MHz, CDCl<sub>3</sub>):  $\delta$  = -159.1. HRMS (ESI-TOF). Calcd for C<sub>21</sub>H<sub>21</sub>FN<sub>2</sub>O<sub>5</sub>Na, [M+Na]<sup>+</sup>  $m/z$  423.1332, Found 423.1344.

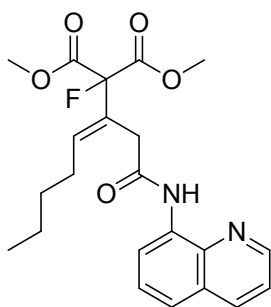

**(E)-dimethyl 2-fluoro-2-(1-oxo-1-(quinolin-8-ylamino)oct-3-en-3-yl)malonate 4am**

Colorless oil. <sup>1</sup>H NMR (400 MHz, CDCl<sub>3</sub>):  $\delta$  = 0.84 (t,  $J$  = 7.2 Hz, 3H), 1.28-1.31 (m, 2H), 1.43-1.51 (m, 2H), 2.27-2.33 (m, 2H), 3.55 (s, 2H), 3.80 (s, 6H), 6.22 (t,  $J$  = 7.2 Hz, 1H), 7.43-7.54 (m, 3H), 8.15 (dd,  $J_1$  = 1.6 Hz,  $J_2$  = 8.4 Hz, 1H), 8.75 (dd,  $J_1$  = 2.4 Hz,  $J_2$  = 6.4 Hz, 1H), 8.79 (dd,  $J_1$  = 1.6 Hz,  $J_2$  = 4.4 Hz, 1H), 10.08 (s, 1H); <sup>13</sup>C NMR (100 MHz, CDCl<sub>3</sub>):  $\delta$  = 13.8, 22.3, 28.3, 30.8,

36.8 (d,  $J = 3.0$  Hz), 53.5, 95.3 (d,  $J = 198.0$  Hz), 116.3, 121.6, 125.6, 125.8, 127.3, 127.9, 134.4, 136.2, 137.1 (d,  $J = 11.0$  Hz), 138.6, 148.2, 165.8 (d,  $J = 26.0$  Hz), 167.5;  $^{19}\text{F}$  NMR (376 MHz,  $\text{CDCl}_3$ ):  $\delta = -157.8$ . HRMS (ESI-TOF). Calcd for  $\text{C}_{22}\text{H}_{26}\text{FN}_2\text{O}_5$ ,  $[\text{M}+\text{H}]^+$   $m/z$  417.1826, Found 417.1831.

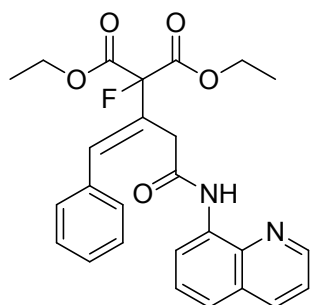

**(*E*)-diethyl 2-fluoro-2-(4-oxo-1-phenyl-4-(quinolin-8-ylamino)but-1-en-2-yl)malonate 5b**

White solid. mp: 121-122 °C.  $^1\text{H}$  NMR (400 MHz,  $\text{CDCl}_3$ ):  $\delta = 1.27$  (t,  $J = 7.2$  Hz, 6H), 3.76 (d,  $J = 1.6$  Hz, 2H), 4.25-4.34 (m, 4H), 7.23-7.33 (m, 4H), 7.41-7.53 (m, 5H), 8.13 (dd,  $J_1 = 1.6$  Hz,  $J_2 = 8.0$  Hz, 1H), 8.74 (dd,  $J_1 = 2.4$  Hz,  $J_2 = 6.4$  Hz, 1H), 8.77 (dd,  $J_1 = 1.6$  Hz,  $J_2 = 4.0$  Hz, 1H), 10.02 (s, 1H);  $^{13}\text{C}$  NMR (100 MHz,  $\text{CDCl}_3$ ):  $\delta = 13.8$ , 37.4 (d,  $J = 4.0$  Hz), 63.0, 95.1 (d,  $J = 200.0$  Hz), 116.3, 121.5 (d,  $J = 7.0$  Hz), 127.3, 127.8, 128.0, 128.5, 128.7, 134.4, 134.5, 134.6, 135.2, 136.1, 138.4, 148.1, 165.2 (d,  $J = 26.0$  Hz), 167.8;  $^{19}\text{F}$  NMR (376 MHz,  $\text{CDCl}_3$ ):  $\delta = -159.0$ . HRMS (ESI-TOF). Calcd for  $\text{C}_{26}\text{H}_{26}\text{FN}_2\text{O}_5$ ,  $[\text{M}+\text{H}]^+$   $m/z$  465.1826, Found 465.1832.

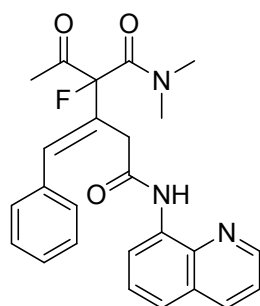

**(*E*)-3-benzylidene-4-fluoro-4-(morpholine-4-carbonyl)-5-oxo-*N*-(quinolin-8-yl)hexanamide**

**5c**

White solid. mp: 178-180 °C.  $^1\text{H}$  NMR (400 MHz,  $\text{CDCl}_3$ ):  $\delta = 2.41$  (d,  $J = 3.6$  Hz, 3H), 2.95 (s, 3H), 3.20 (d,  $J = 3.2$  Hz, 3H), 3.48 (dd,  $J_1 = 2.0$  Hz,  $J_2 = 16.0$  Hz, 1H), 3.74 (d,  $J = 16.4$  Hz, 1H), 6.99 (s, 1H), 7.25-7.35 (m, 3H), 7.42-7.53 (m, 5H), 8.14 (d,  $J = 8.0$  Hz, 1H), 8.73-8.78 (m, 2H),

9.89 (s, 1H);  $^{13}\text{C}$  NMR (100 MHz,  $\text{CDCl}_3$ ):  $\delta$  = 26.1, 36.6, 37.6 (dd,  $J_1$  = 3.0 Hz,  $J_2$  = 7.0 Hz), 102.1 (d,  $J$  = 198.0 Hz), 116.2, 121.6 (d,  $J$  = 6.0 Hz), 127.2, 127.8, 128.0, 128.2, 128.4, 128.4, 128.6, 134.0 (d,  $J$  = 9.0 Hz), 134.4, 135.2, 136.2, 138.2, 148.1, 165.7 (d,  $J$  = 21.0 Hz), 168.2, 199.6 (d,  $J$  = 30.0 Hz);  $^{19}\text{F}$  NMR (376 MHz,  $\text{CDCl}_3$ ):  $\delta$  = -156.2. HRMS (ESI-TOF). Calcd for  $\text{C}_{25}\text{H}_{25}\text{FN}_3\text{O}_3$ ,  $[\text{M}+\text{H}]^+$   $m/z$  434.1880, Found 434.1887.

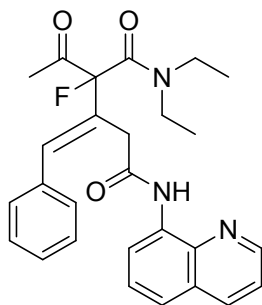

**(*E*)-2-acetyl-3-benzylidene-*N*<sup>1</sup>,*N*<sup>1</sup>-diethyl-2-fluoro-*N*<sup>5</sup>-(quinolin-8-yl)pentanediamide 5d**

White solid. mp: 128-130 °C.  $^1\text{H}$  NMR (400 MHz,  $\text{CDCl}_3$ ):  $\delta$  = 1.13 (t,  $J$  = 7.2 Hz, 3H), 1.19 (t,  $J$  = 7.2 Hz, 3H), 2.40 (d,  $J$  = 3.6 Hz, 3H), 3.17-3.25 (m, 2H), 3.41-3.56 (m, 2H), 3.74-3.91 (m, 2H), 6.97 (s, 1H), 7.25-7.35 (m, 3H), 7.42-7.54 (m, 5H), 8.14 (d,  $J$  = 8.0 Hz, 1H), 8.71-8.78 (m, 2H), 9.90 (s, 1H);  $^{13}\text{C}$  NMR (100 MHz,  $\text{CDCl}_3$ ):  $\delta$  = 12.1, 13.9 (d,  $J$  = 2.0 Hz), 26.1, 37.6 (d,  $J$  = 4.0 Hz), 40.9, 42.3 (d,  $J$  = 8.0 Hz), 102.3 (d,  $J$  = 198.0 Hz), 116.3, 121.6 (d,  $J$  = 10.0 Hz), 127.2, 127.9, 128.0, 128.5, 128.6, 128.6, 128.8, 134.1 (d,  $J$  = 9.0 Hz), 134.4, 135.3, 136.2, 138.3, 148.1, 165.4 (d,  $J$  = 20.0 Hz), 168.2, 199.4 (d,  $J$  = 29.0 Hz);  $^{19}\text{F}$  NMR (376 MHz,  $\text{CDCl}_3$ ):  $\delta$  = -156.6. HRMS (ESI-TOF). Calcd for  $\text{C}_{27}\text{H}_{28}\text{FN}_3\text{O}_3\text{Na}$ ,  $[\text{M}+\text{Na}]^+$   $m/z$  484.2012, Found 484.2016.

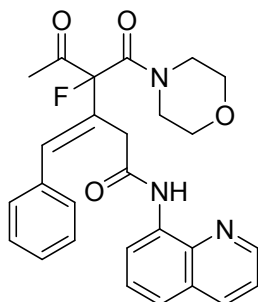

**(*E*)-3-benzylidene-4-fluoro-4-(morpholine-4-carbonyl)-5-oxo-*N*-(quinolin-8-yl)hexanamide**

**5e**

White solid. mp: 153-155 °C.  $^1\text{H}$  NMR (400 MHz,  $\text{CDCl}_3$ ):  $\delta$  = 2.42 (d,  $J$  = 3.6 Hz, 3H), 3.37 (dd,

$J_1 = 2.0$  Hz,  $J_2 = 16.0$  Hz, 1H), 3.54-3.92 (m, 9H), 7.00 (d,  $J = 1.2$  Hz, 1H), 7.27-7.37 (m, 3H), 7.43-7.54 (m, 5H), 8.15 (dd,  $J_1 = 1.6$  Hz,  $J_2 = 8.4$  Hz, 1H), 8.73 (dd,  $J_1 = 2.0$  Hz,  $J_2 = 6.0$  Hz, 1H), 8.78 (dd,  $J_1 = 1.6$  Hz,  $J_2 = 4.0$  Hz, 1H), 9.87 (s, 1H);  $^{13}\text{C}$  NMR (100 MHz,  $\text{CDCl}_3$ ):  $\delta = 26.2$ , 37.5 (d,  $J = 5.0$  Hz), 43.0, 46.9 (d,  $J = 8.0$  Hz), 66.5 (d,  $J = 12.0$  Hz), 102.3 (d,  $J = 196.0$  Hz), 116.3, 121.7, 127.2, 127.9, 128.2, 128.4, 128.6, 134.3, 134.7 (d,  $J = 8.0$  Hz), 135.0, 136.3, 138.2, 148.2, 164.6 (d,  $J = 20.0$  Hz), 168.2, 199.3 (d,  $J = 30.0$  Hz);  $^{19}\text{F}$  NMR (376 MHz,  $\text{CDCl}_3$ ):  $\delta = -157.0$ . HRMS (ESI-TOF). Calcd for  $\text{C}_{27}\text{H}_{27}\text{FN}_3\text{O}_4$ ,  $[\text{M}+\text{H}]^+$   $m/z$  476.1986, Found 476.2000.

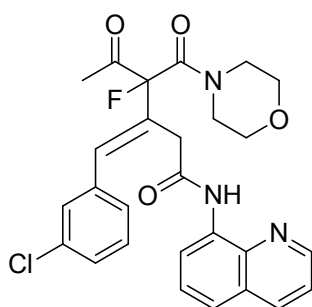

**(*E*)-3-(3-chlorobenzylidene)-4-fluoro-4-(morpholine-4-carbonyl)-5-oxo-*N*-(quinolin-8-yl)hexanamide 5f**

White solid. mp: 156-157 °C.  $^1\text{H}$  NMR (400 MHz,  $\text{CDCl}_3$ ):  $\delta = 2.41$  (d,  $J = 3.6$  Hz, 3H), 3.36-3.85 (m, 10H), 6.93 (s, 1H), 7.26-7.30 (m, 2H), 7.41-7.56 (m, 5H), 8.16 (d,  $J = 8.4$  Hz, 1H), 8.72 (dd,  $J_1 = 2.4$  Hz,  $J_2 = 6.0$  Hz, 1H), 8.80 (d,  $J = 4.0$  Hz, 1H), 9.86 (s, 1H);  $^{13}\text{C}$  NMR (100 MHz,  $\text{CDCl}_3$ ):  $\delta = 26.1$ , 37.5 (d,  $J = 4.0$  Hz), 43.1, 46.8 (d,  $J = 9.0$  Hz), 66.5 (d,  $J = 13.0$  Hz), 102.0 (d,  $J = 197.0$  Hz), 116.3, 121.7 (d,  $J = 5.0$  Hz), 126.6, 127.2, 127.9, 128.3, 128.7, 129.7, 129.8, 133.0, 133.0, 134.2, 134.5, 136.3, 136.8, 138.2, 148.2, 164.4 (d,  $J = 21.0$  Hz), 167.9, 199.0 (d,  $J = 30.0$  Hz);  $^{19}\text{F}$  NMR (376 MHz,  $\text{CDCl}_3$ ):  $\delta = -157.1$ . HRMS (ESI-TOF). Calcd for  $\text{C}_{27}\text{H}_{26}\text{ClFN}_3\text{O}_4$ ,  $[\text{M}+\text{H}]^+$   $m/z$  510.1596, Found 510.1599.

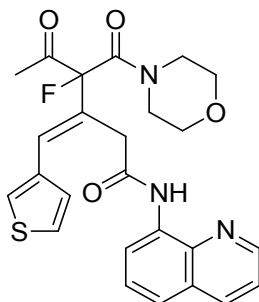

**(E)-4-fluoro-4-(morpholine-4-carbonyl)-5-oxo-N-(quinolin-8-yl)-3-(thiophen-3-ylmethylene)hexanamide 5g**

White solid. mp: 182-183 °C. <sup>1</sup>H NMR (400 MHz, CDCl<sub>3</sub>): δ = 2.41 (d, *J* = 3.6 Hz, 3H), 3.45-3.84 (m, 10H), 6.92 (s, 1H), 7.21 (d, *J* = 4.8 Hz, 1H), 7.31 (dd, *J*<sub>1</sub> = 2.8 Hz, *J*<sub>2</sub> = 4.8 Hz, 1H), 7.46 (dd, *J*<sub>1</sub> = 4.0 Hz, *J*<sub>2</sub> = 8.4 Hz, 1H), 7.51-7.56 (m, 2H), 7.61 (d, *J* = 2.0 Hz, 1H), 8.16 (dd, *J*<sub>1</sub> = 1.2 Hz, *J*<sub>2</sub> = 8.4 Hz, 1H), 8.74 (dd, *J*<sub>1</sub> = 2.8 Hz, *J*<sub>2</sub> = 6.0 Hz, 1H), 8.79 (dd, *J*<sub>1</sub> = 1.2 Hz, *J*<sub>2</sub> = 4.0 Hz, 1H), 9.97 (s, 1H); <sup>13</sup>C NMR (100 MHz, CDCl<sub>3</sub>): δ = 26.2, 38.0 (d, *J* = 4.0 Hz), 43.0, 46.8 (d, *J* = 9.0 Hz), 66.5 (d, *J* = 14.0 Hz), 102.3 (d, *J* = 196.0 Hz), 116.3, 121.7 (d, *J* = 5.0 Hz), 125.3, 126.0, 127.0 (d, *J* = 20.0 Hz), 127.2, 127.9, 128.3, 128.7 (d, *J* = 9.0 Hz), 134.3, 135.8, 136.3, 136.8, 138.2, 148.2, 164.5 (d, *J* = 20.0 Hz), 168.0, 199.4 (d, *J* = 30.0 Hz); <sup>19</sup>F NMR (376 MHz, CDCl<sub>3</sub>): δ = -156.0. HRMS (ESI-TOF). Calcd for C<sub>25</sub>H<sub>25</sub>FN<sub>3</sub>O<sub>4</sub>S, [M+H]<sup>+</sup> *m/z* 482.1550, Found 482.1542.

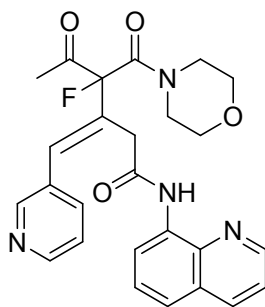

**(E)-4-fluoro-4-(morpholine-4-carbonyl)-5-oxo-3-(pyridin-3-ylmethylene)-N-(quinolin-8-yl)hexanamide 5h**

White solid. mp: 117-118 °C. <sup>1</sup>H NMR (400 MHz, CDCl<sub>3</sub>): δ = 2.42 (d, *J* = 3.6 Hz, 3H), 3.43-3.86 (m, 10H), 6.96 (s, 1H), 7.27-7.30 (m, 1H), 7.46 (dd, *J*<sub>1</sub> = 4.0 Hz, *J*<sub>2</sub> = 8.4 Hz, 1H), 7.52-7.56 (m, 2H), 7.92 (d, *J* = 8.0 Hz, 1H), 8.16 (d, *J* = 8.0 Hz, 1H), 8.53 (d, *J* = 3.6 Hz, 1H), 8.70-8.72 (m, 2H), 8.79 (d, *J* = 2.8 Hz, 1H), 9.90 (s, 1H); <sup>13</sup>C NMR (100 MHz, CDCl<sub>3</sub>): δ = 26.0, 37.5 (d, *J* = 4.0 Hz), 43.0, 46.7 (d, *J* = 9.0 Hz), 66.4 (d, *J* = 15.0 Hz), 101.9 (d, *J* = 198.0 Hz), 116.3, 121.7 (d, *J* = 11.0 Hz), 123.3, 127.2, 127.8, 130.5, 130.6 (d, *J* = 2.0 Hz), 130.8, 130.9, 134.1, 135.6, 136.3, 138.1, 148.2, 149.2, 149.7, 164.2 (d, *J* = 20.0 Hz), 167.7, 198.9 (d, *J* = 30.0 Hz); <sup>19</sup>F NMR (376 MHz, CDCl<sub>3</sub>): δ = -156.9. HRMS (ESI-TOF). Calcd for C<sub>26</sub>H<sub>26</sub>FN<sub>4</sub>O<sub>4</sub>, [M+H]<sup>+</sup> *m/z* 477.1938, Found 477.1919.

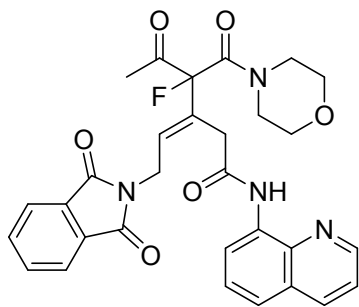

**(*E*)-3-(2-(1,3-dioxoisindolin-2-yl)ethylidene)-4-fluoro-4-(morpholine-4-carbonyl)-5-oxo-*N*-(quinolin-8-yl)hexanamide 5i**

White solid. mp: 97-98 °C. <sup>1</sup>H NMR (400 MHz, CDCl<sub>3</sub>): δ = 2.32 (d, *J* = 3.6 Hz, 3H), 3.46-3.66 (m, 9H), 3.85-3.89 (m, 1H), 4.55-4.59 (m, 2H), 6.12 (t, *J* = 7.2 Hz, 1H), 7.43-7.50 (m, 3H), 7.66-7.69 (m, 2H), 7.75-7.78 (m, 2H), 8.14 (dd, *J*<sub>1</sub> = 1.6 Hz, *J*<sub>2</sub> = 8.4 Hz, 1H), 8.60 (dd, *J*<sub>1</sub> = 2.8 Hz, *J*<sub>2</sub> = 6.4 Hz, 1H), 8.80 (dd, *J*<sub>1</sub> = 1.2 Hz, *J*<sub>2</sub> = 4.0 Hz, 1H), 9.95 (s, 1H); <sup>13</sup>C NMR (100 MHz, CDCl<sub>3</sub>): δ = 25.9, 35.4, 36.3 (d, *J* = 4.0 Hz), 42.9, 46.5 (d, *J* = 9.0 Hz), 66.3 (d, *J* = 20.0 Hz), 101.1 (d, *J* = 199.0 Hz), 116.2, 121.6, 123.2, 127.1, 127.8, 128.2 (d, *J* = 10.0 Hz), 130.8, 131.0, 131.9, 133.9, 134.2, 136.1, 138.2, 148.2, 164.0 (d, *J* = 21.0 Hz), 167.0, 167.6, 199.0 (d, *J* = 29.0 Hz); <sup>19</sup>F NMR (376 MHz, CDCl<sub>3</sub>): δ = -157.4. HRMS (ESI-TOF). Calcd for C<sub>30</sub>H<sub>28</sub>FN<sub>4</sub>O<sub>6</sub>, [M+H]<sup>+</sup> *m/z* 559.1993, Found 559.1979.

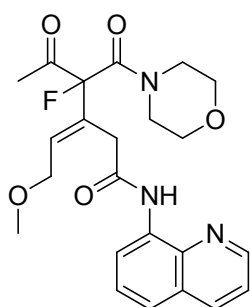

**(*E*)-4-fluoro-3-(2-methoxyethylidene)-4-(morpholine-4-carbonyl)-5-oxo-*N*-(quinolin-8-yl)hexanamide 5j**

White solid. mp: 120-124 °C. <sup>1</sup>H NMR (400 MHz, CDCl<sub>3</sub>): δ = 2.34 (d, *J* = 3.6 Hz, 3H), 3.36-3.40 (m, 4H), 3.53-3.63 (m, 9H), 4.24 (d, *J* = 4.4 Hz, 2H), 6.10 (t, *J* = 5.6 Hz, 1H), 7.43-7.53 (m, 3H), 8.14 (dd, *J*<sub>1</sub> = 1.6 Hz, *J*<sub>2</sub> = 8.4 Hz, 1H), 8.66-8.69 (m, 1H), 8.79 (dd, *J*<sub>1</sub> = 1.6 Hz, *J*<sub>2</sub> = 4.4 Hz, 1H), 9.97 (s, 1H); <sup>13</sup>C NMR (100 MHz, CDCl<sub>3</sub>): δ = 25.8, 36.9 (d, *J* = 4.0 Hz), 42.9, 46.6 (d, *J* = 10.0 Hz), 58.5, 66.3 (d, *J* = 25.0 Hz), 69.0, 101.3 (d, *J* = 198.0 Hz), 116.3, 121.7 (d, *J* = 8.0 Hz), 127.2,

127.9, 128.6, 128.8, 132.1 (d,  $J = 8.0$  Hz), 134.3, 136.3, 138.3, 148.2, 164.1 (d,  $J = 21.0$  Hz), 167.2, 199.3 (d,  $J = 30.0$  Hz);  $^{19}\text{F}$  NMR (376 MHz,  $\text{CDCl}_3$ ):  $\delta = -157.0$ . HRMS (ESI-TOF). Calcd for  $\text{C}_{23}\text{H}_{27}\text{FN}_3\text{O}_5$ ,  $[\text{M}+\text{H}]^+$   $m/z$  444.1935, Found 444.1951.

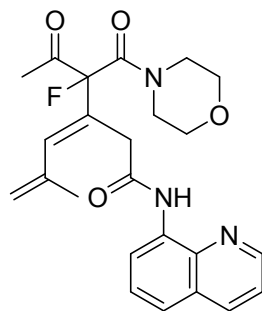

**(*E*)-3-(2-fluoro-1-morpholino-1,3-dioxobutan-2-yl)-5-methyl-*N*-(quinolin-8-yl)hexa-3,5-dienamide 5k**

White solid. mp: 149-151 °C.  $^1\text{H}$  NMR (400 MHz,  $\text{CDCl}_3$ ):  $\delta = 1.92$  (s, 3H), 2.37 (d,  $J = 4.0$  Hz, 3H), 3.35-3.81 (m, 10H), 5.12 (s, 1H), 5.25 (s, 1H), 6.33 (s, 1H), 7.44-7.54 (m, 3H), 8.15 (dd,  $J_1 = 1.6$  Hz,  $J_2 = 8.4$  Hz, 1H), 8.69 (dd,  $J_1 = 2.8$  Hz,  $J_2 = 6.4$  Hz, 1H), 8.79 (dd,  $J_1 = 1.6$  Hz,  $J_2 = 4.0$  Hz, 1H), 9.86 (s, 1H);  $^{13}\text{C}$  NMR (100 MHz,  $\text{CDCl}_3$ ):  $\delta = 22.8$ , 26.1, 37.4 (d,  $J = 4.0$  Hz), 43.0, 46.8 (d,  $J = 9.0$  Hz), 66.5 (d,  $J = 17.0$  Hz), 102.2 (d,  $J = 196.0$  Hz), 116.3, 117.6, 121.6 (d,  $J = 11.0$  Hz), 126.7, 126.9, 127.3, 127.9, 134.4, 136.3, 136.4, 138.2, 139.8, 148.2, 164.6 (d,  $J = 20.0$  Hz), 168.2, 199.4 (d,  $J = 30.0$  Hz);  $^{19}\text{F}$  NMR (376 MHz,  $\text{CDCl}_3$ ):  $\delta = -157.0$ . HRMS (ESI-TOF). Calcd for  $\text{C}_{24}\text{H}_{27}\text{FN}_3\text{O}_4$ ,  $[\text{M}+\text{H}]^+$   $m/z$  440.1986, Found 440.1992.

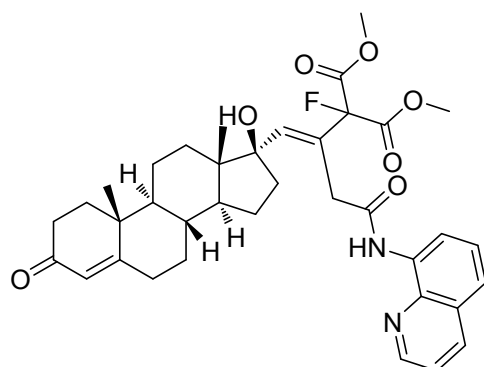

**dimethyl 2-fluoro-2-((*E*)-1-((8*R*,9*S*,10*R*,13*S*,14*S*,17*R*)-17-hydroxy-10,13-dimethyl-3-oxo-2,3,6,7,8,9,10,11,12,13,14,15,16,17-tetradecahydro-1*H*-cyclopenta[*a*]phenanthren-17-yl)-5-oxo-5-(quinolin-8-ylamino)pent-2-en-3-yl)malonate 7**



White solid. mp: 177-178 °C. <sup>1</sup>H NMR (400 MHz, CDCl<sub>3</sub>): δ = 0.84-1.04 (m, 5H), 1.19 (s, 3H), 1.24-1.49 (m, 4H), 1.58-1.73 (m, 5H), 1.85-2.08 (m, 4H), 2.29-2.42 (m, 4H), 3.69-3.98 (s, 8H), 4.87 (s, 1H), 5.72 (s, 1H), 6.24 (s, 1H), 7.46 (dd, *J*<sub>1</sub> = 4.4 Hz, *J*<sub>2</sub> = 8.4 Hz, 1H), 7.50-7.53 (m, 2H), 8.16 (dd, *J*<sub>1</sub> = 1.2 Hz, *J*<sub>2</sub> = 8.0 Hz, 1H), 8.67 (dd, *J*<sub>1</sub> = 2.8 Hz, *J*<sub>2</sub> = 6.0 Hz, 1H), 8.81 (dd, *J*<sub>1</sub> = 1.6 Hz, *J*<sub>2</sub> = 4.0 Hz, 1H), 10.01 (s, 1H); <sup>13</sup>C NMR (100 MHz, CDCl<sub>3</sub>): δ = 14.1, 17.4, 20.7, 23.8, 31.7, 31.9, 32.8, 33.9, 35.7, 36.4, 36.9 (d, *J* = 4.0 Hz), 38.6, 39.3, 48.3, 50.8, 53.5, 53.8, 84.1, 95.5 (d, *J* = 200.0 Hz), 117.0, 121.7, 122.1, 123.9, 124.6, 124.8, 127.2, 127.9, 134.0, 136.4, 138.4, 140.2 (d, *J* = 10.0 Hz), 148.4, 165.8 (dd, *J*<sub>1</sub> = 6.0 Hz, *J*<sub>2</sub> = 26.0 Hz), 170.6 (d, *J* = 100.0 Hz), 199.5; <sup>19</sup>F NMR (376 MHz, CDCl<sub>3</sub>): δ = -156.6. HRMS (ESI-TOF). Calcd for C<sub>37</sub>H<sub>44</sub>FN<sub>2</sub>O<sub>7</sub>, [M+H]<sup>+</sup> *m/z* 647.3133, Found 647.3121.

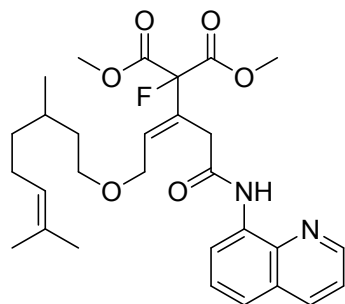

**(*E*)-dimethyl 2-(1-((3,7-dimethyloct-6-en-1-yl)oxy)-5-oxo-5-(quinolin-8-ylamino)pent-2-en-3-yl)-2-fluoromalonate 9**

Colorless oil. <sup>1</sup>H NMR (400 MHz, CDCl<sub>3</sub>): δ = 0.79 (d, *J* = 6.4 Hz, 3H), 1.04-1.11 (m, 1H), 1.23-1.34 (m, 2H), 1.43-1.51 (m, 1H), 1.53-1.61 (m, 4H), 1.65 (s, 3H), 1.83-1.95 (m, 2H), 3.42-3.47 (m, 2H), 3.61 (s, 2H), 3.79 (s, 6H), 4.26-4.28 (m, 2H), 5.03 (t, *J* = 7.2 Hz, 1H), 6.34 (t, *J* = 6.0 Hz, 1H), 7.41-7.49 (m, 3H), 8.13 (dd, *J*<sub>1</sub> = 1.6 Hz, *J*<sub>2</sub> = 8.4 Hz, 1H), 8.71 (dd, *J*<sub>1</sub> = 3.2 Hz, *J*<sub>2</sub> = 5.6 Hz, 1H), 8.79 (dd, *J*<sub>1</sub> = 1.6 Hz, *J*<sub>2</sub> = 4.4 Hz, 1H), 10.01 (s, 1H); <sup>13</sup>C NMR (100 MHz, CDCl<sub>3</sub>): δ = 17.5, 19.3, 25.3, 25.6, 29.4, 36.4, 36.9 (d, *J* = 3.0 Hz), 53.5, 67.4, 69.3, 94.8 (d, *J* = 200.0 Hz), 116.3, 121.6 (d, *J* = 3.0 Hz), 124.7, 127.2, 127.3, 127.5, 127.8, 131.0, 133.3 (d, *J* = 11.0 Hz), 134.3, 136.2, 138.4, 148.2, 165.4 (d, *J* = 26.0 Hz), 167.1; <sup>19</sup>F NMR (376 MHz, CDCl<sub>3</sub>): δ = -158.6. HRMS (ESI-TOF). Calcd for C<sub>29</sub>H<sub>38</sub>FN<sub>2</sub>O<sub>6</sub>, [M+H]<sup>+</sup> *m/z* 529.2714, Found 529.2730.

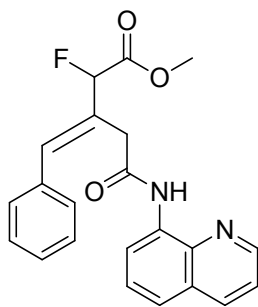

**(E)-methyl 3-benzylidene-2-fluoro-5-oxo-5-(quinolin-8-ylamino)pentanoate 10**

Colorless oil.  $^1\text{H}$  NMR (400 MHz,  $\text{CDCl}_3$ ):  $\delta$  = 3.66 (dd,  $J_1$  = 16.0 Hz,  $J_2$  = 20.0 Hz, 2H), 3.77 (s, 3H), 5.59 (d,  $J$  = 47.6 Hz, 1H), 7.15 (s, 1H), 7.29-7.37 (m, 3H), 7.44-7.56 (m, 5H), 8.16 (d,  $J$  = 8.0 Hz, 1H), 8.76-8.80 (m, 2H), 10.04 (s, 1H);  $^{13}\text{C}$  NMR (100 MHz,  $\text{CDCl}_3$ ):  $\delta$  = 36.5, 52.7, 91.5 (d,  $J$  = 185.0 Hz), 116.5, 121.7 (d,  $J$  = 6.0 Hz), 127.3, 127.9, 128.2, 128.6, 128.7, 128.7, 134.3, 135.1, 136.0, 136.1, 136.3, 138.4, 148.2, 167.9, 168.5 (d,  $J$  = 27.0 Hz);  $^{19}\text{F}$  NMR (376 MHz,  $\text{CDCl}_3$ ):  $\delta$  = -183.3. HRMS (ESI-TOF). Calcd for  $\text{C}_{22}\text{H}_{20}\text{FN}_2\text{O}_3$ ,  $[\text{M}+\text{H}]^+$   $m/z$  379.1458, Found 379.1467.

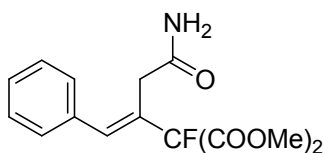

**(E)-dimethyl 2-(4-amino-4-oxo-1-phenylbut-1-en-2-yl)-2-fluoromalonate 11**

Pale yellow oil.  $^1\text{H}$  NMR (400 MHz,  $\text{CDCl}_3$ ):  $\delta$  = 3.40 (s, 2H), 3.89 (s, 6H), 5.75 (d,  $J$  = 77.2 Hz, 2H), 7.06 (s, 1H), 7.31-7.38 (m, 5H);  $^{13}\text{C}$  NMR (100 MHz,  $\text{CDCl}_3$ ):  $\delta$  = 35.5 (d,  $J$  = 4.0 Hz), 53.8, 95.4 (d,  $J$  = 199.0 Hz), 127.6 (d,  $J$  = 20.0 Hz), 128.4, 128.6, 128.8, 134.7 (d,  $J$  = 8.0 Hz), 134.8, 165.8 (d,  $J$  = 26.0 Hz), 171.8;  $^{19}\text{F}$  NMR (376 MHz,  $\text{CDCl}_3$ ):  $\delta$  = -158.0. HRMS (ESI-TOF). Calcd for  $\text{C}_{15}\text{H}_{17}\text{FNO}_5$ ,  $[\text{M}+\text{H}]^+$   $m/z$  310.1091, Found 310.1095.

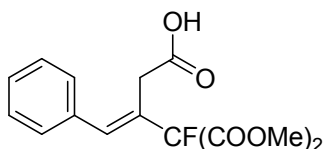

**(E)-3-benzylidene-4-fluoro-5-methoxy-4-(methoxycarbonyl)-5-oxopentanoic acid 12**

Pale yellow oil.  $^1\text{H}$  NMR (400 MHz, DMSO):  $\delta$  = 3.44 (s, 2H), 3.81 (s, 6H), 6.94 (s, 1H), 7.33-7.36 (m, 3H), 7.41 (t,  $J$  = 7.2 Hz, 2H), 12.59 (s, 1H);  $^{13}\text{C}$  NMR (100 MHz, DMSO):  $\delta$  = 34.3 (d,  $J$  = 4.0 Hz), 54.2, 95.6 (d,  $J$  = 198.0 Hz), 127.8, 128.0, 128.7, 129.0, 132.9 (d,  $J$  = 11.0 Hz), 135.2,

165.6 (d,  $J = 26.0$  Hz), 171.9;  $^{19}\text{F}$  NMR (376 MHz, DMSO):  $\delta = -158.0$ . HRMS (ESI-TOF). Calcd for  $\text{C}_{15}\text{H}_{16}\text{FO}_6$ ,  $[\text{M}+\text{H}]^+$   $m/z$  311.0931, Found 311.0928.

## 7. Structure Analysis X-Ray Crystallography of 4k

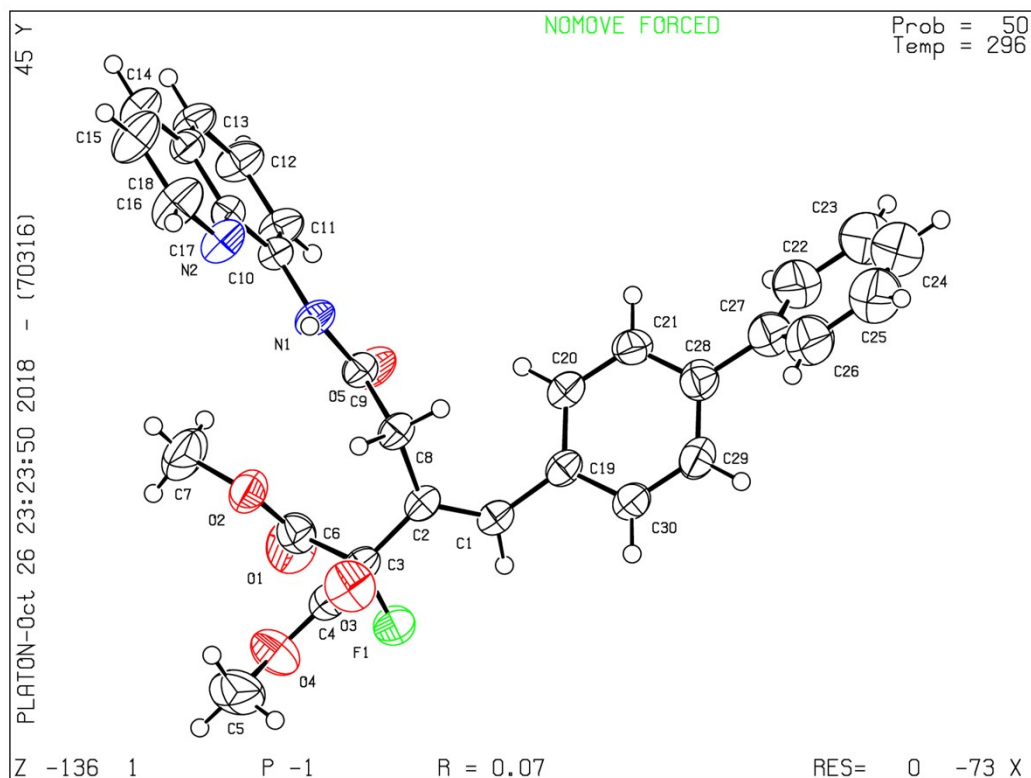

| Compound                          | <b>4k</b>                                                      |
|-----------------------------------|----------------------------------------------------------------|
| Empirical formula                 | C <sub>30</sub> H <sub>25</sub> FN <sub>2</sub> O <sub>5</sub> |
| Formula weight                    | 512.52                                                         |
| Crystal system                    | Triclinic                                                      |
| Space group                       | P-1                                                            |
| <i>a</i> (Å)                      | 10.0079(5)                                                     |
| <i>b</i> (Å)                      | 11.0103(5)                                                     |
| <i>c</i> (Å)                      | 13.8154(7)                                                     |
| $\alpha$ (°)                      | 68.117(3)                                                      |
| $\beta$ (°)                       | 74.662(4)                                                      |
| $\gamma$ (°)                      | 67.141(3)                                                      |
| <i>V</i> (Å <sup>3</sup> )        | 1288.87(12)                                                    |
| <i>Z</i>                          | 2                                                              |
| <i>D</i> /g cm <sup>-3</sup>      | 1.321                                                          |
| $\mu$ /mm <sup>-1</sup>           | 0.095                                                          |
| <i>F</i> (000)                    | 536.0                                                          |
| Reflns number                     | 13223                                                          |
| <i>R</i> <sub>int</sub>           | 0.0290                                                         |
| <i>R</i> <sub><i>I</i></sub>      | 0.0659                                                         |
| GOF                               | 1.087                                                          |
| <i>wR</i> <sub>2</sub> (all data) | 0.1960                                                         |

## 8. Mechanistic Study

## 8.1 Radical Inhibition Experiments

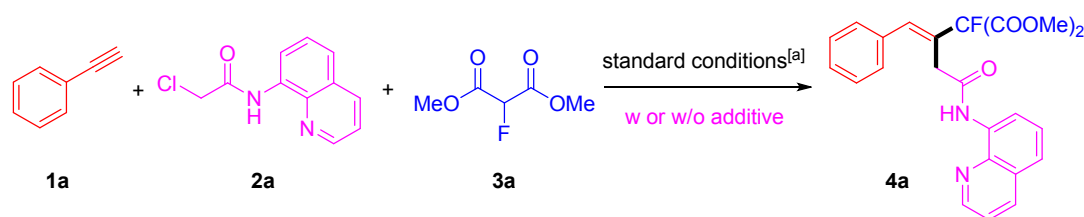

| Additive        | 4a, yield (%) <sup>[b]</sup> |
|-----------------|------------------------------|
| none            | 94%                          |
| BHT (2 equiv)   | 86%                          |
| TEMPO (2 equiv) | 80%                          |

[a] Standard conditions: **1a** (0.33 mmol), **2a** (0.3 mmol), **3a** (0.45 mmol), CuI (10 mol %), and Cs<sub>2</sub>CO<sub>3</sub> (0.36 mmol)

in THF (0.9 mL) under N<sub>2</sub> atmosphere at 80 °C for 1.5 h. [b] Yield of the isolated product.

## 8.2 Control Experiment

To probe the reaction mechanism, compounds **13** and **14** were prepared as possible reaction intermediate, and reacted with another coupling partner under the standard reaction conditions. We conducted the following experiments.

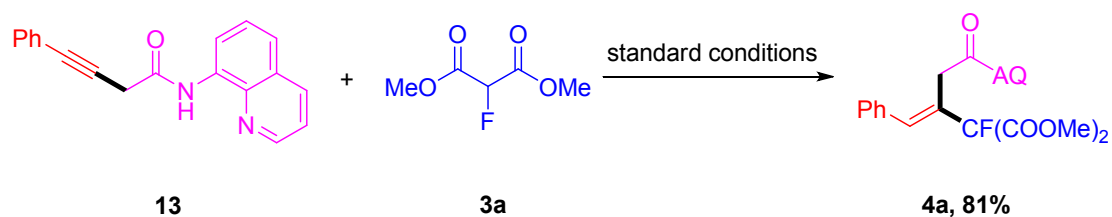

Following the general procedure 4, to a solution of **13** (85.9 mg, 0.3 mmol) in THF (0.9 mL) was added **3a** (70.4 mg, 0.45 mmol), CuI (5.7 mg, 0.03 mmol), and Cs<sub>2</sub>CO<sub>3</sub> (117.3 mg, 0.36 mmol) under N<sub>2</sub> in screw-cap test tube. The reaction mixture was stirred at 80 °C for 1.5 h. After the reaction finished, the reaction mixture was cooled to room temperature and quenched by water. The mixture was extracted with EtOAc (3.0 mL×3), the combined organic phases were dried over anhydrous Na<sub>2</sub>SO<sub>4</sub> and the solvent was evaporated under vacuum. The residue was purified by column chromatography to give the corresponding products **4a** (106.0 mg, 81%). This result

suggested that **13** might be the active intermediate.

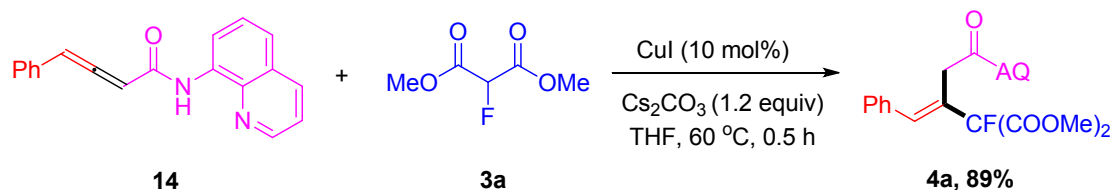

Following the general procedure 4, to a solution of **14** (85.9 mg, 0.3 mmol) in THF (0.9 mL) was added **3a** (70.4 mg, 0.45 mmol), CuI (5.7 mg, 0.03 mmol), and Cs<sub>2</sub>CO<sub>3</sub> (117.3 mg, 0.36 mmol) under N<sub>2</sub> in screw-cap test tube. The reaction mixture was stirred at 60 °C for 0.5 h. After the reaction finished, the reaction mixture was cooled to room temperature and quenched by water. The mixture was extracted with EtOAc (3.0 mL×3), the combined organic phases were dried over anhydrous Na<sub>2</sub>SO<sub>4</sub> and the solvent was evaporated under vacuum. The residue was purified by column chromatography to give the corresponding products **4a** (117.0 mg, 89%). This result suggested that **14** might be the active intermediate.

To further clarify the reaction mechanism, the reaction of **14** with **3a** in the absence of CuI was conducted.

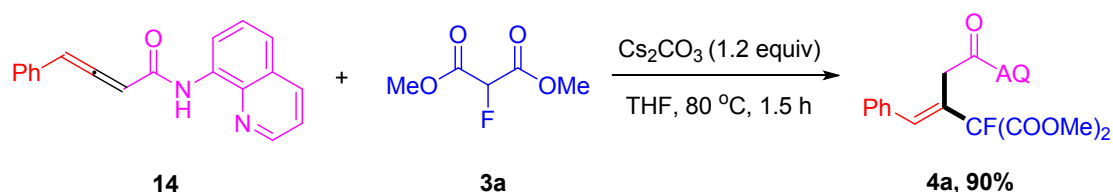

Following the general procedure 4, to a solution of **14** (85.9 mg, 0.3 mmol) in THF (0.9 mL) was added **3a** (70.4 mg, 0.45 mmol), and Cs<sub>2</sub>CO<sub>3</sub> (117.3 mg, 0.36 mmol) under N<sub>2</sub> in screw-cap test tube. The reaction mixture was stirred at 80 °C for 1.5 h. After the reaction finished, the reaction mixture was cooled to room temperature and quenched by water. The mixture was extracted with EtOAc (3.0 mL×3), the combined organic phases were dried over anhydrous Na<sub>2</sub>SO<sub>4</sub> and the solvent was evaporated under vacuum. The residue was purified by column chromatography to give the corresponding products **4a** (117.5 mg, 90%). This result suggested that the presence of CuI has no obvious effect on this step.

## 9. References

- [1] T. Vilaivan, *Tetrahedron Lett.*, 2006, **47**, 6739.
- [2] J. Bi, Z. Zhang, Q. Liu and G. Zhang, *Green Chem.*, 2012, **14**, 1159.
- [3] J. Li, D. Ding, L. Liu and J. Sun, *RSC Adv.*, 2013, **3**, 21260.
- [4] (a) J. Dubois, C. Foures, S. Bory, S. Falcou, M. Gaudry and A. Marquet, *Tetrahedron* 1991, **47**, 1001; (b) K. Kwon, S. M. Kim and D. Y. Kim, *J. Fluorine Chem.*, 2009, **130**, 759; (c) E. Lisse and G. Sandford, *J. Fluorine Chem.*, 2018, **206**, 117; (d) A. Harsanyi and G. Sandford, *Green Chem.*, 2015, **17**, 3000; (e) A. Harsanyi and G. Sandford, *Org. Process Res. Dev.*, 2014, **18**, 981.
- [5] F. Zhu, P.-W. Xu, F. Zhou, C.-H. Wang and J. Zhou, *Org. Lett.*, 2015, **17**, 972.
- [6] Z. Zhang, X. Li, M. Song, Y. Wan, D. Zheng, G. Zhang and G. Chen, *J. Org. Chem.*, 2019, **84**, 12792.
- [7] P. Chaudhary, S. Gupta, N. Muniyappan, S. Sabiah and J. Kandasamy, *Green Chem.*, 2016, **18**, 2323.

## 10. <sup>1</sup>H, <sup>13</sup>C and <sup>19</sup>F NMR Spectra of Compounds 4, 5, 7, 9-12

### Product 4a

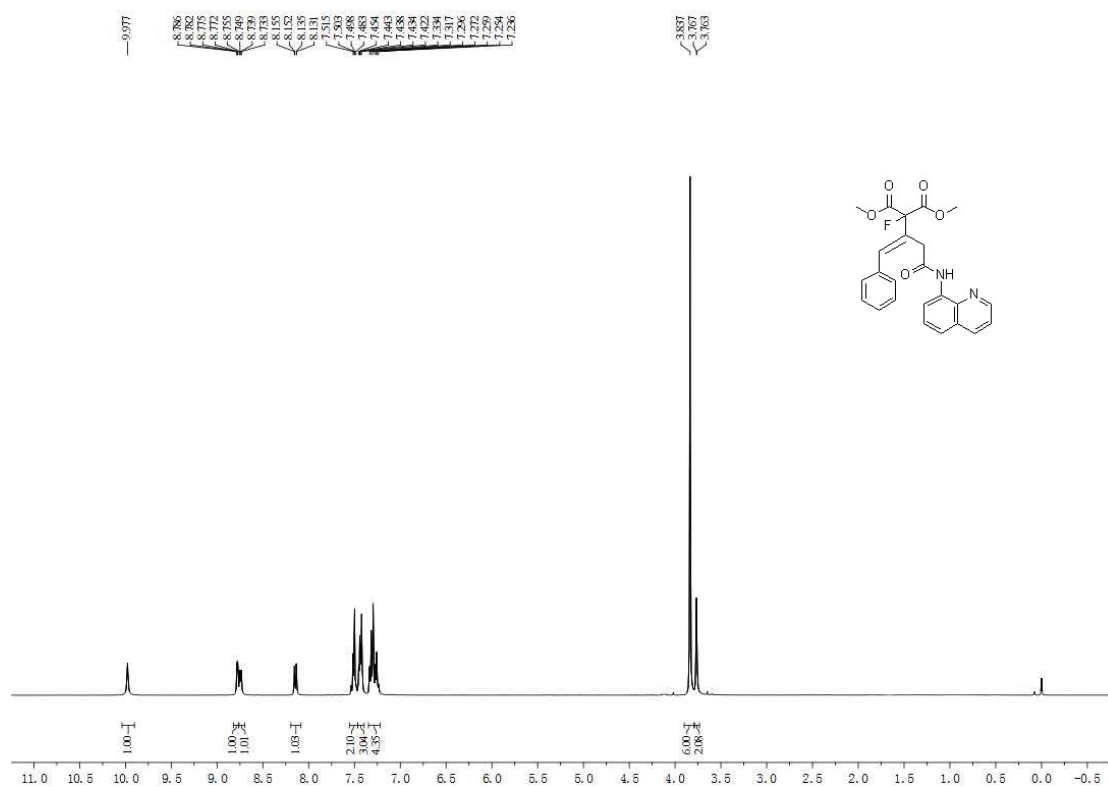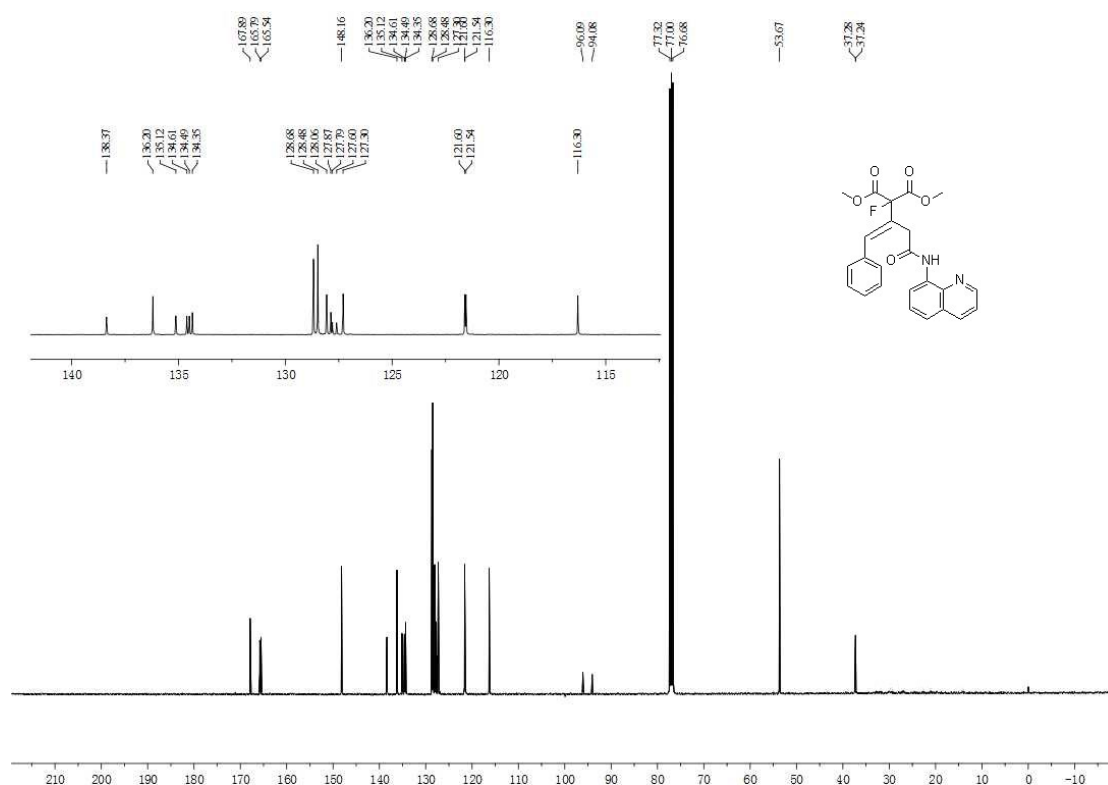



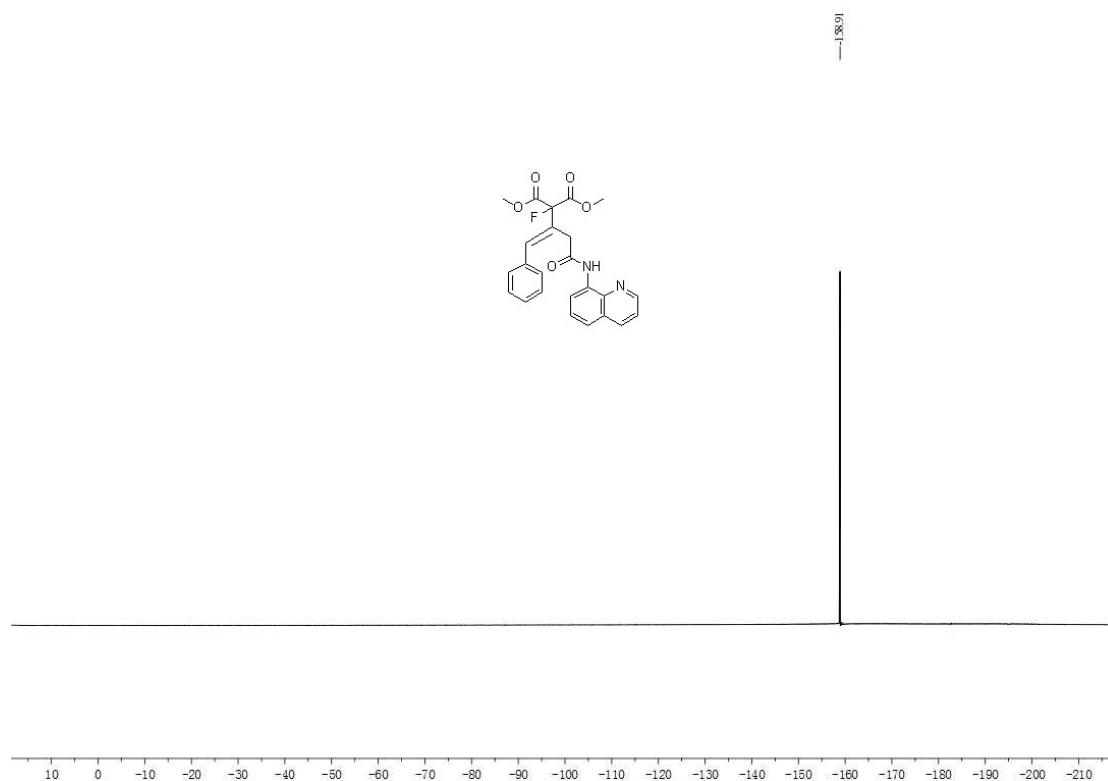

# **Product 4b**

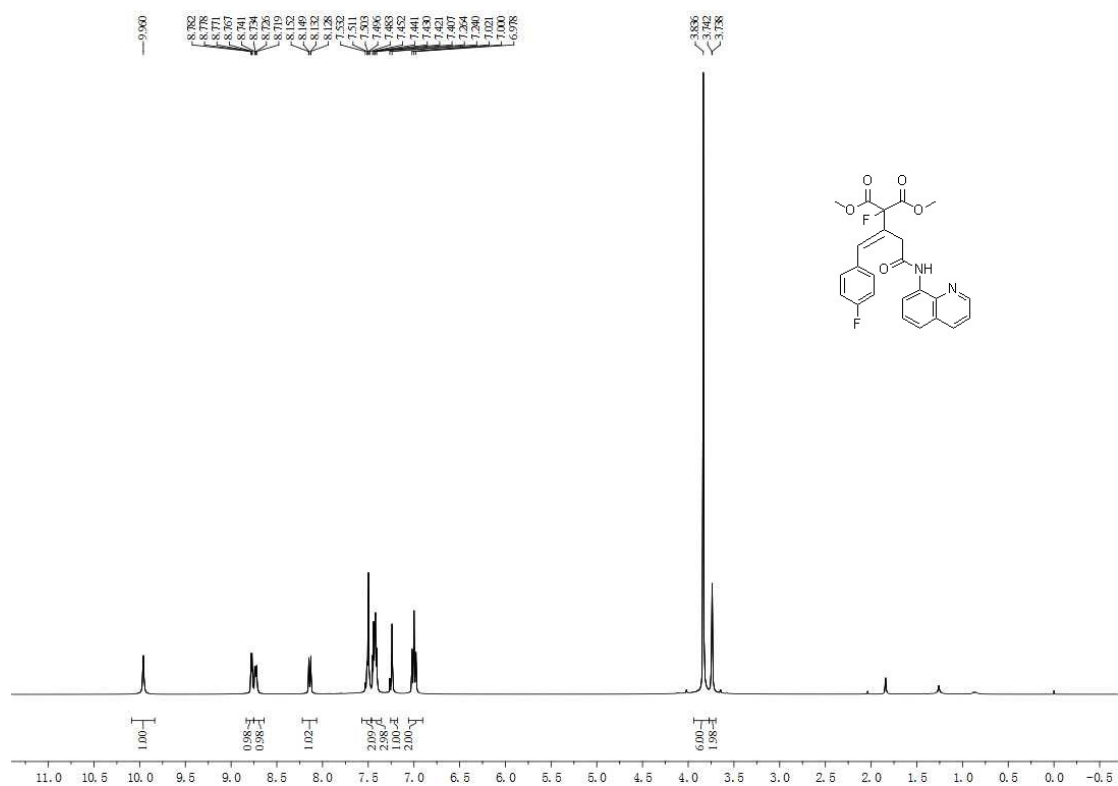

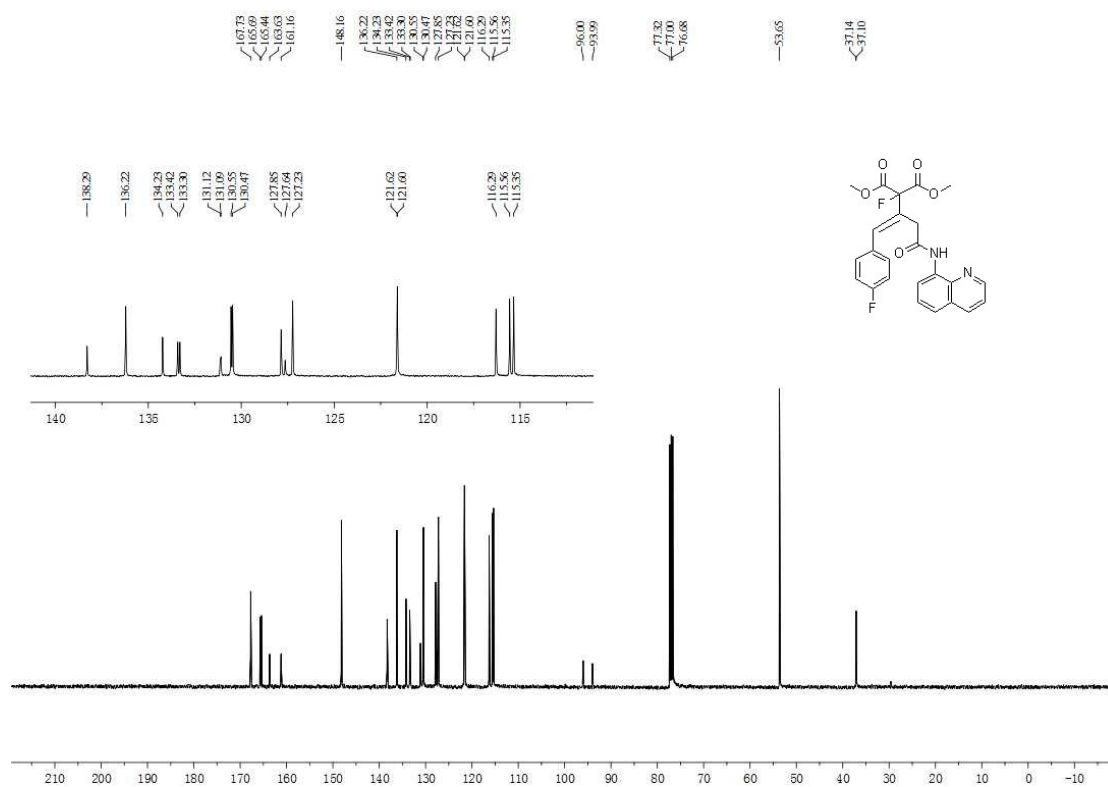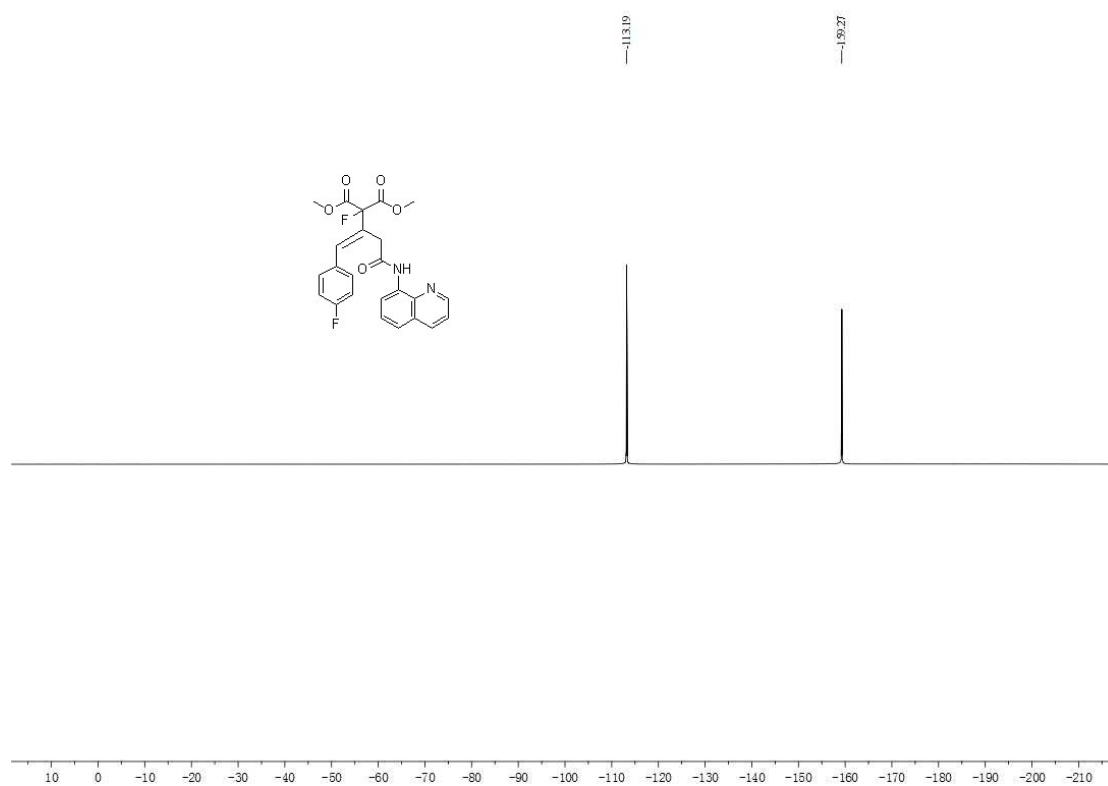

# Product 4c

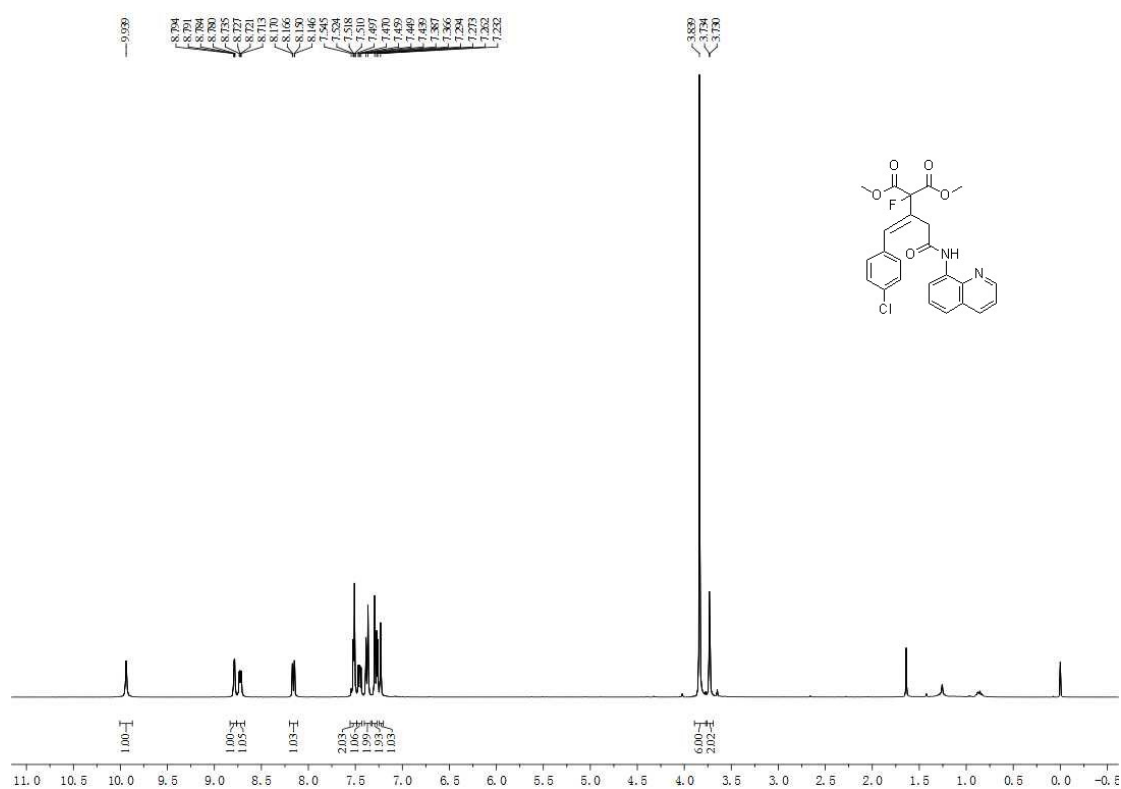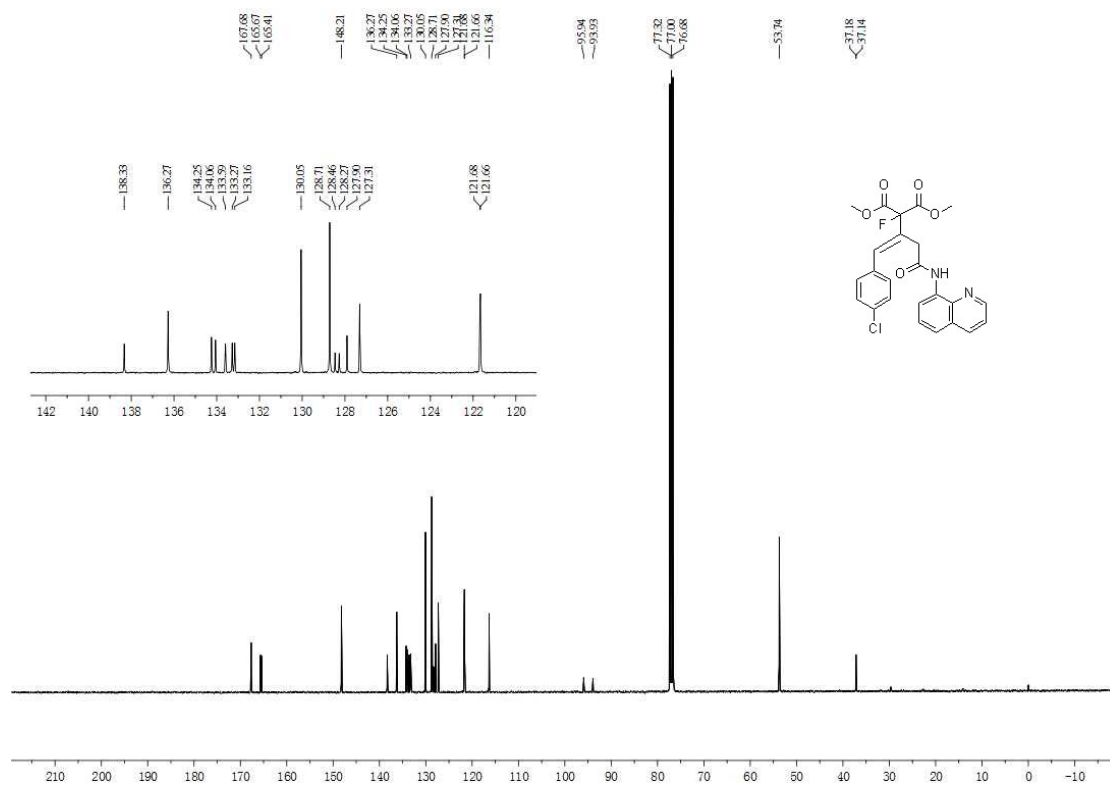

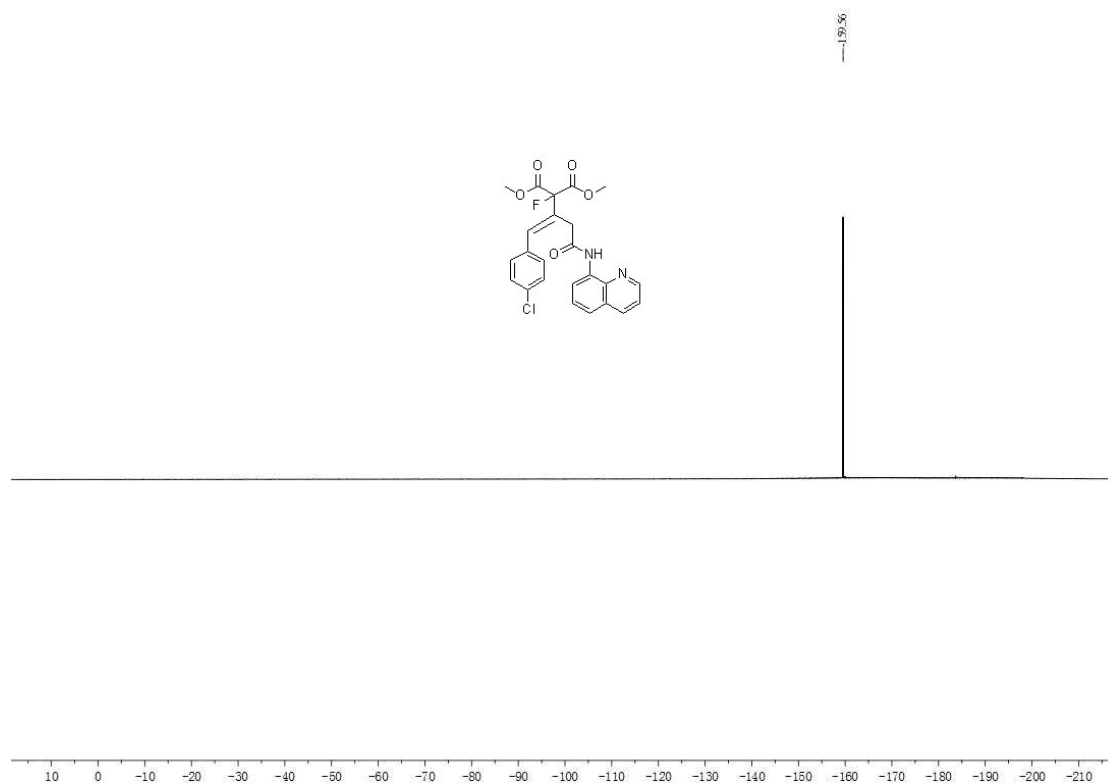

# Product 4d

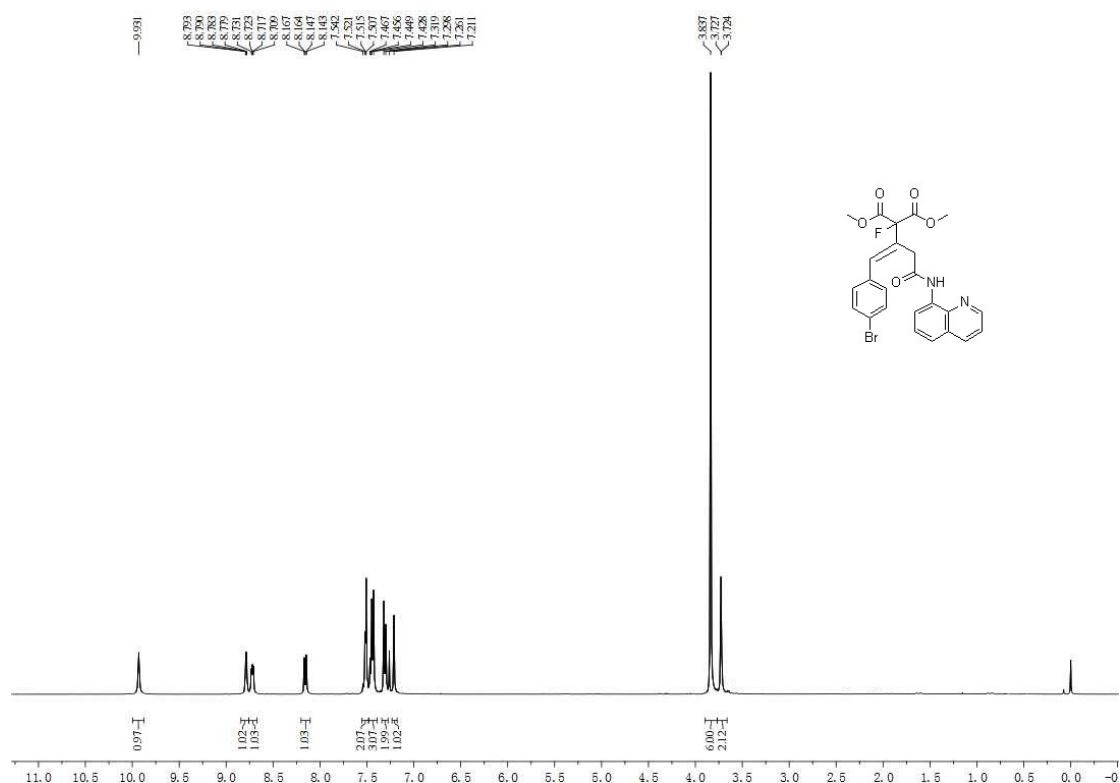

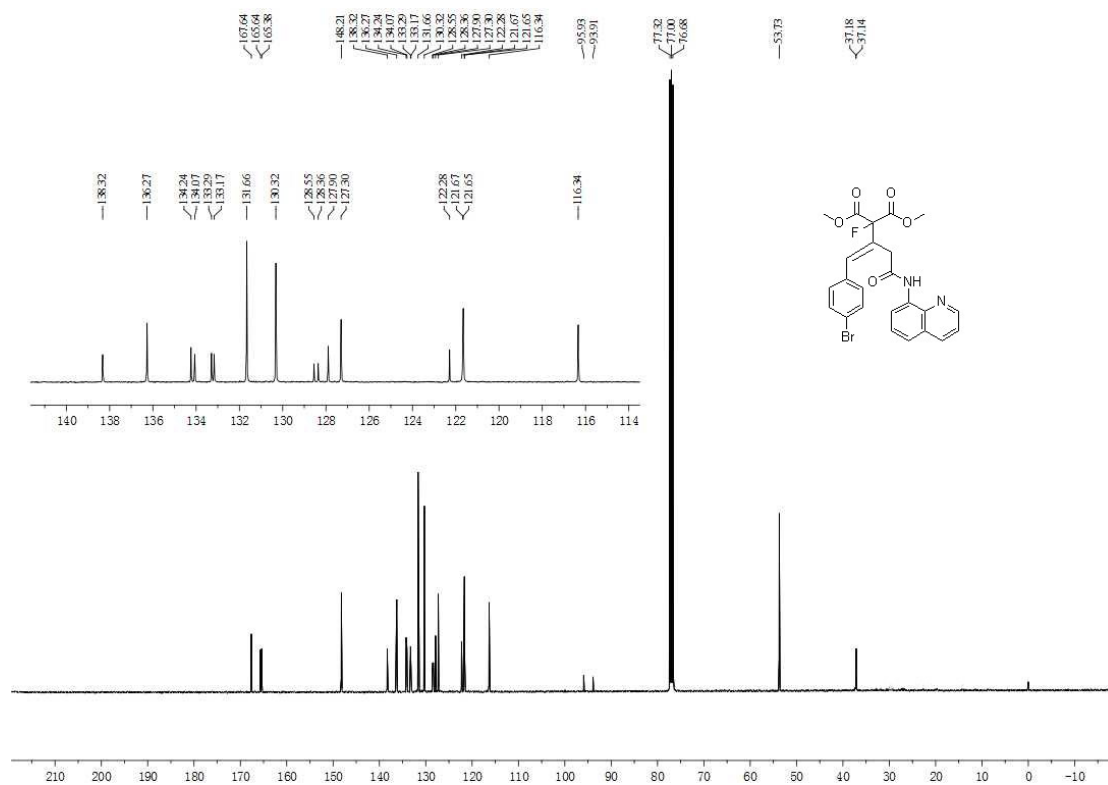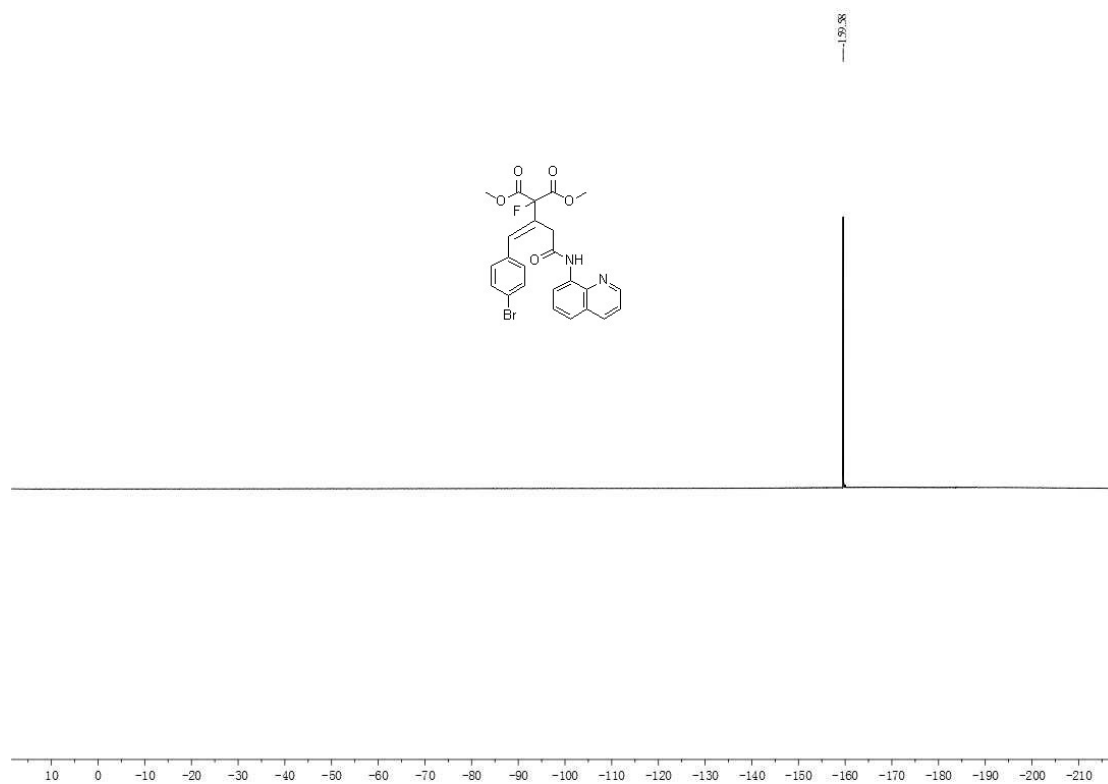

# Product 4e

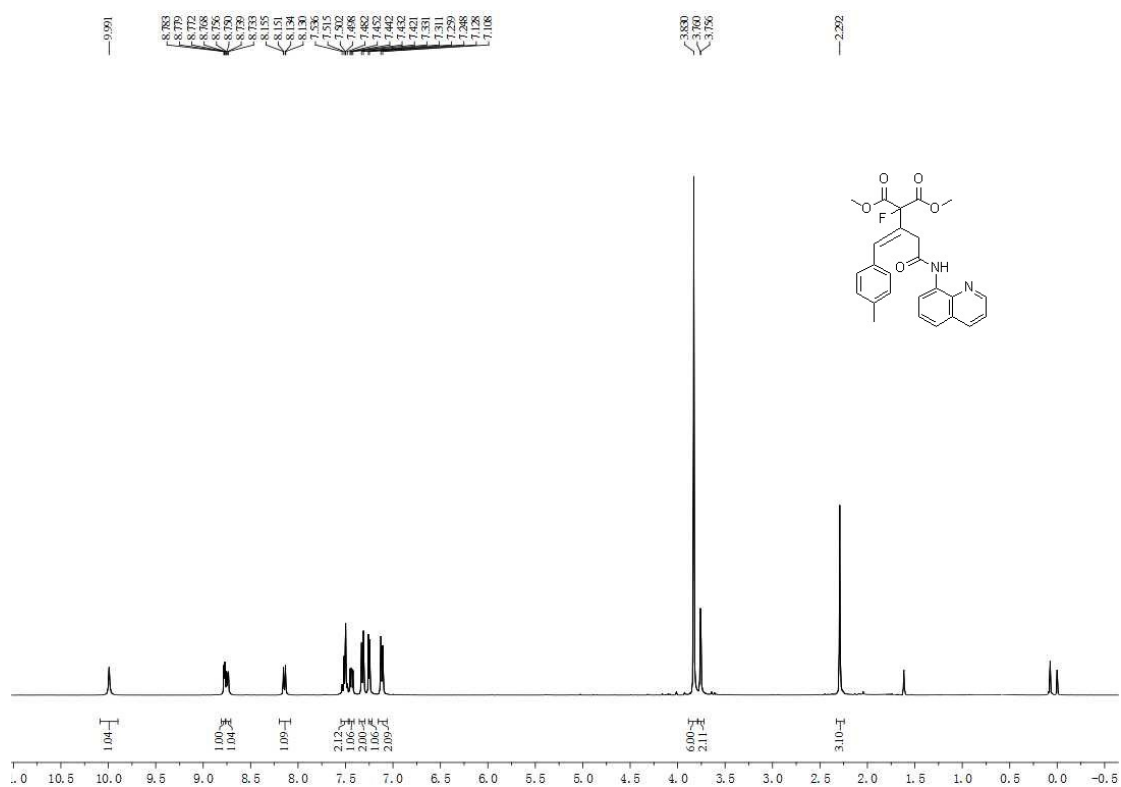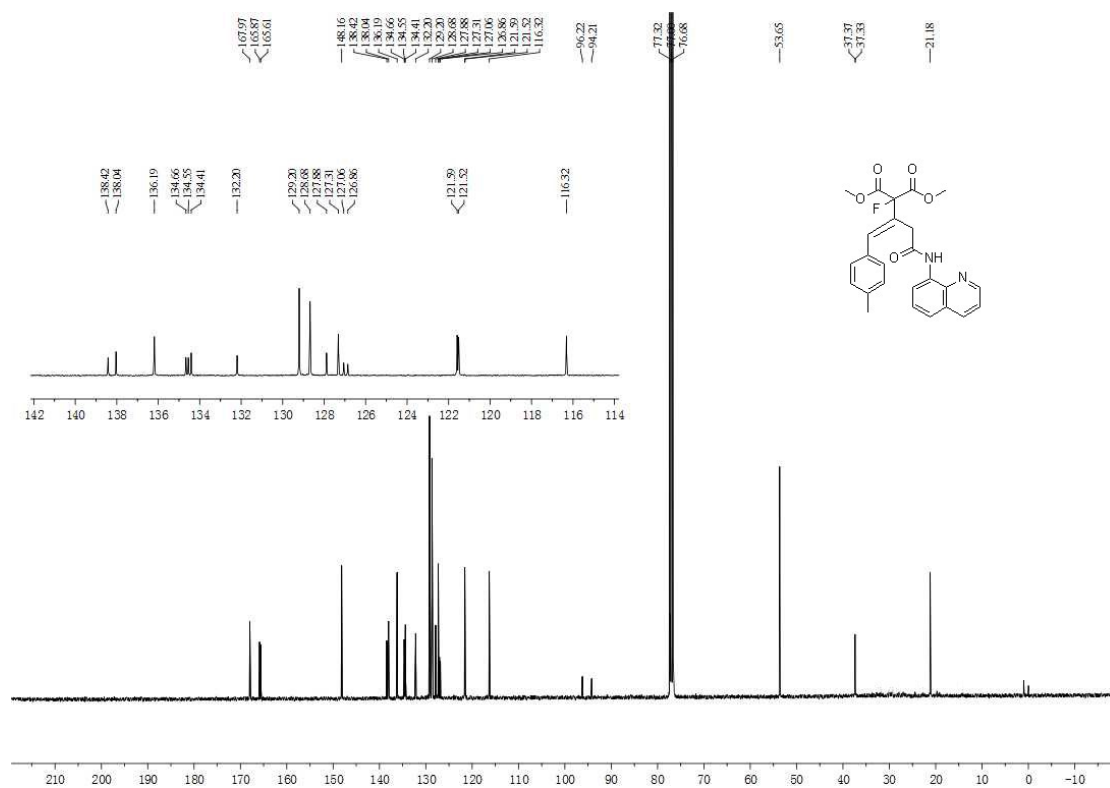

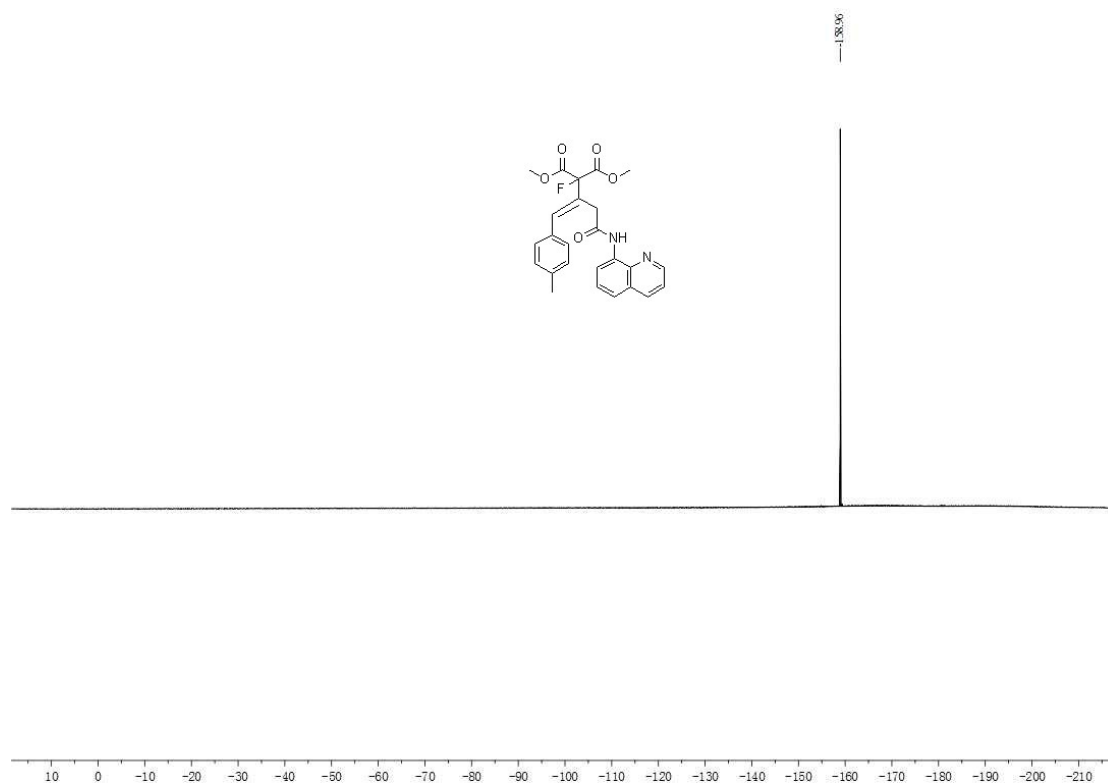

# **Product 4f**

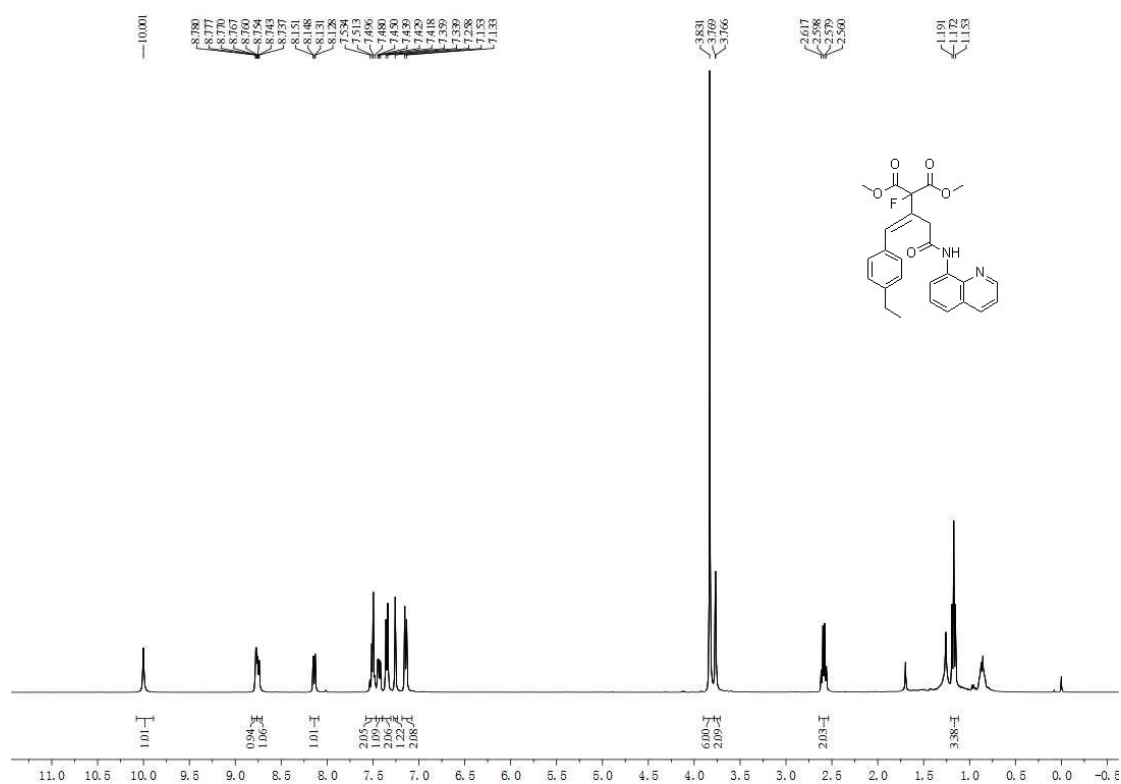

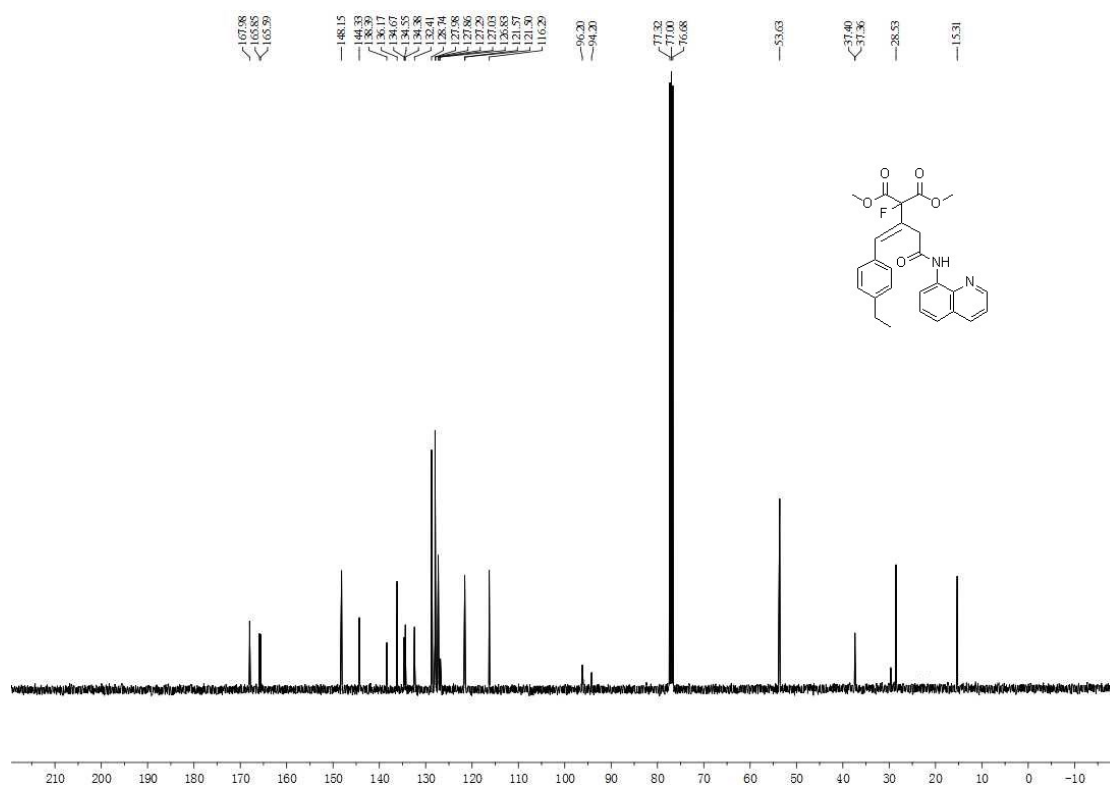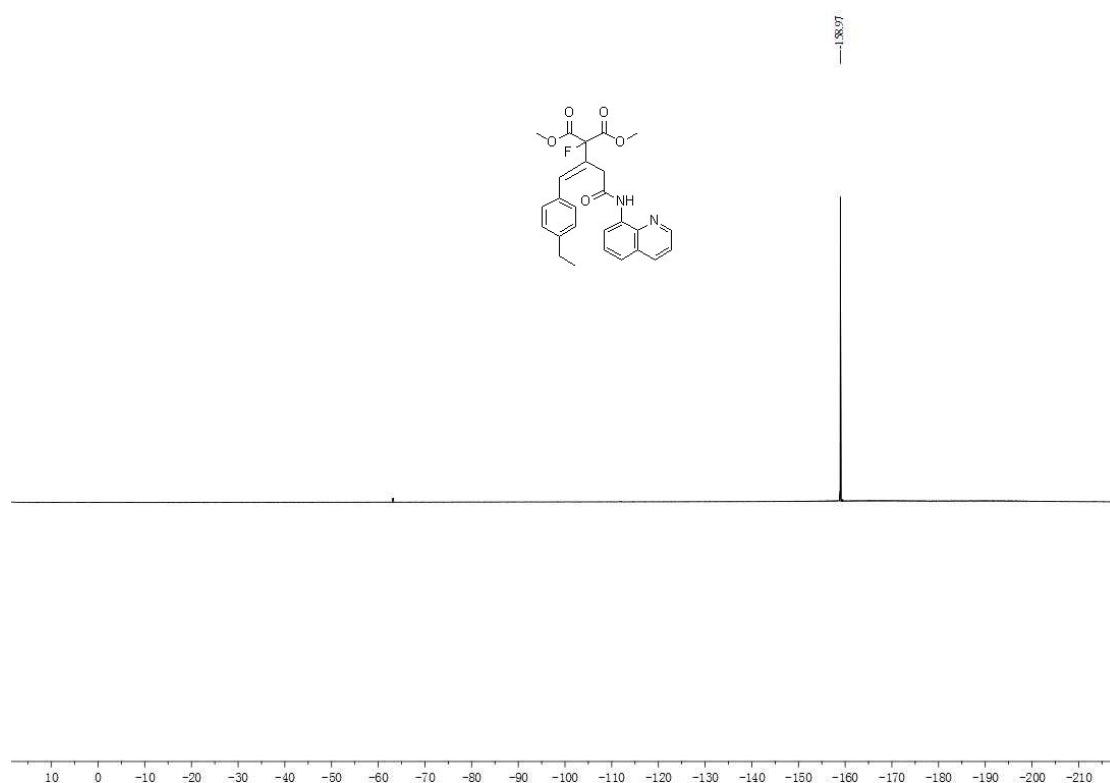



# Product 4g

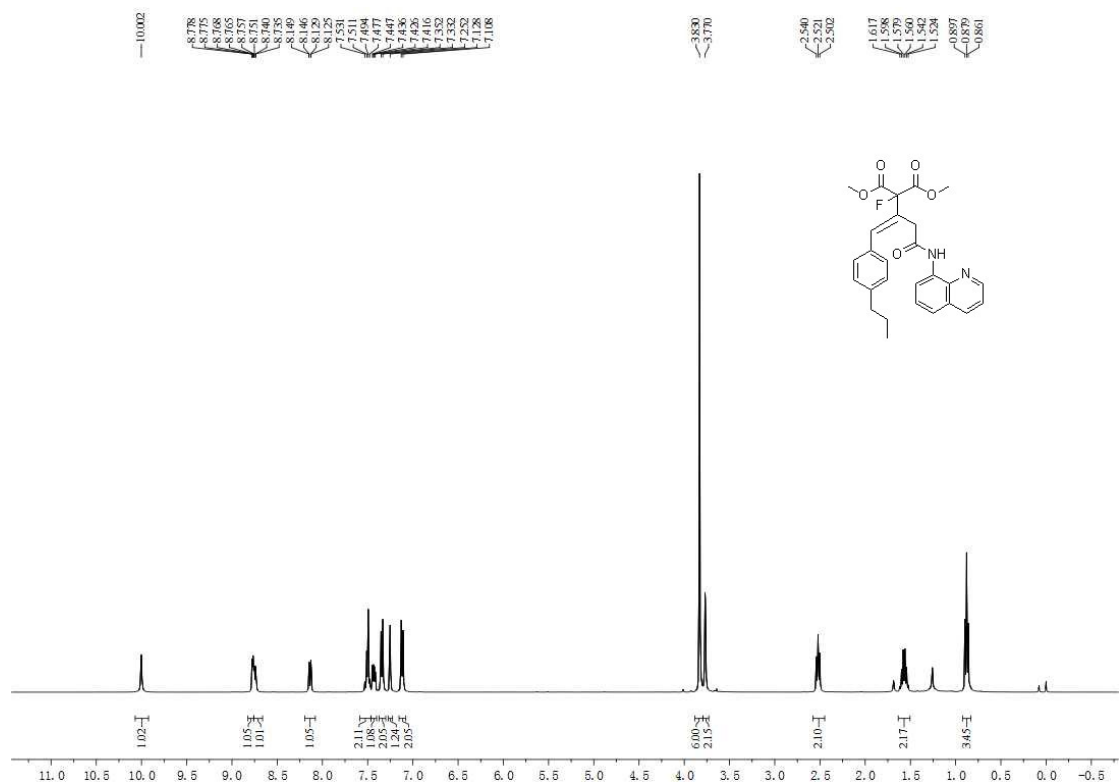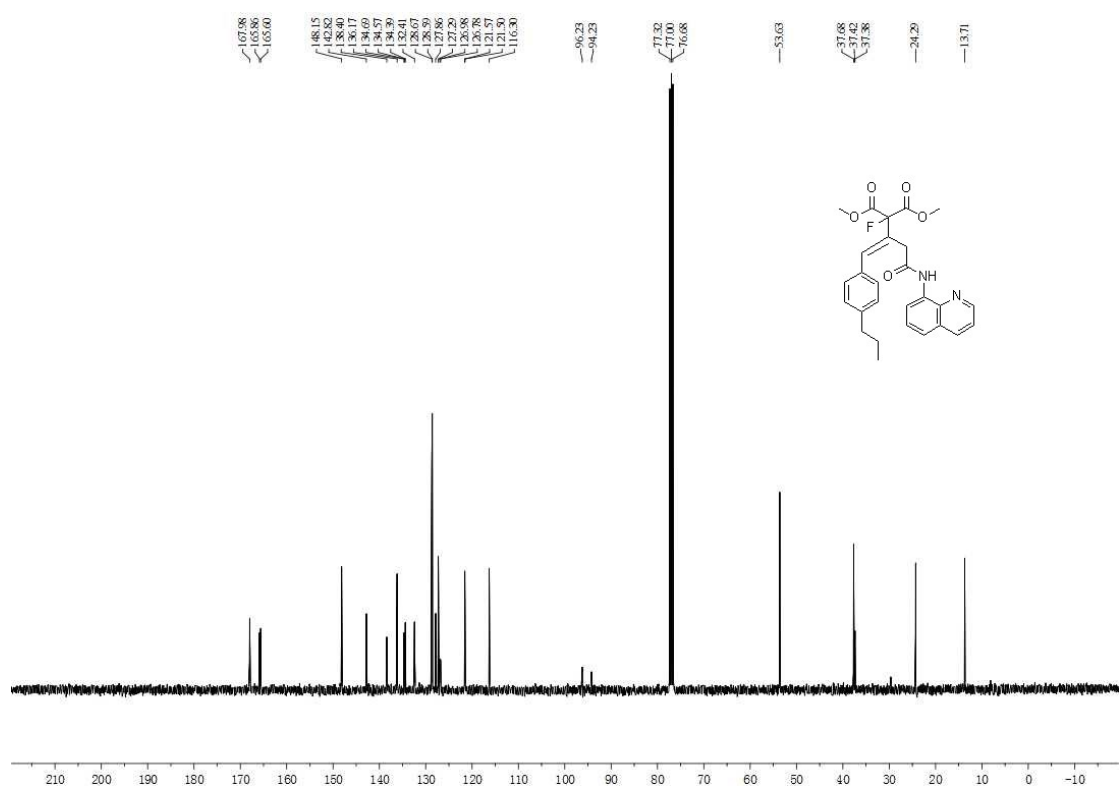

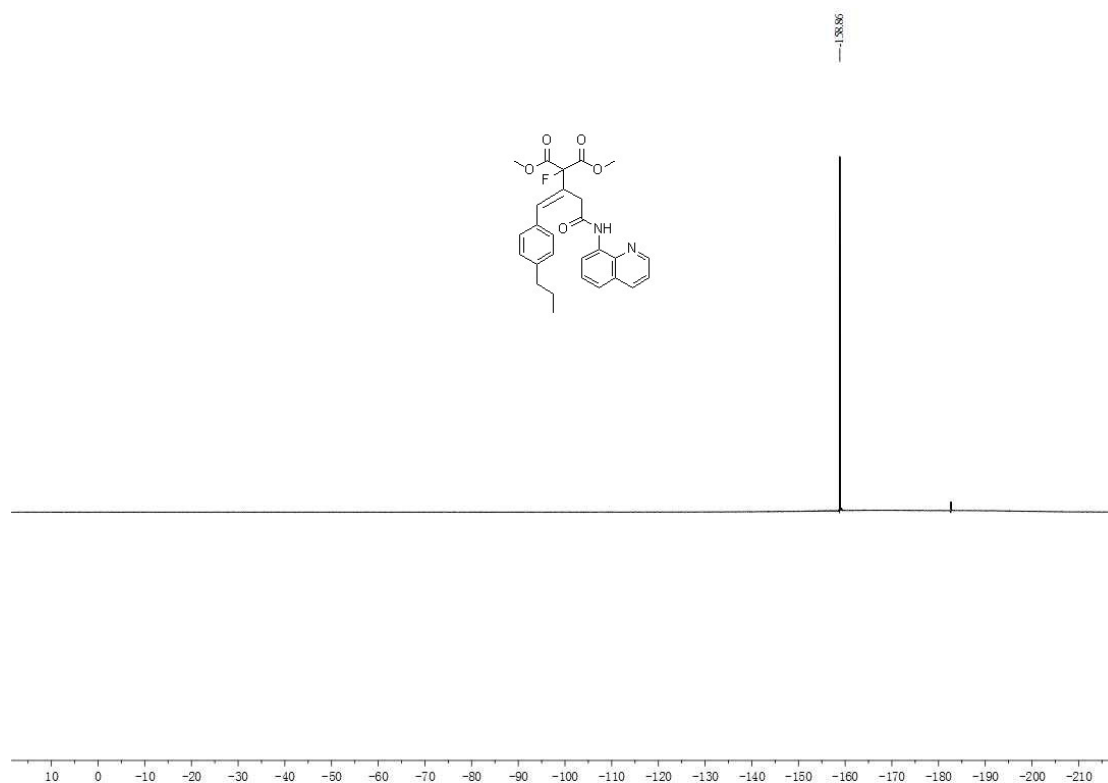

# Product 4h

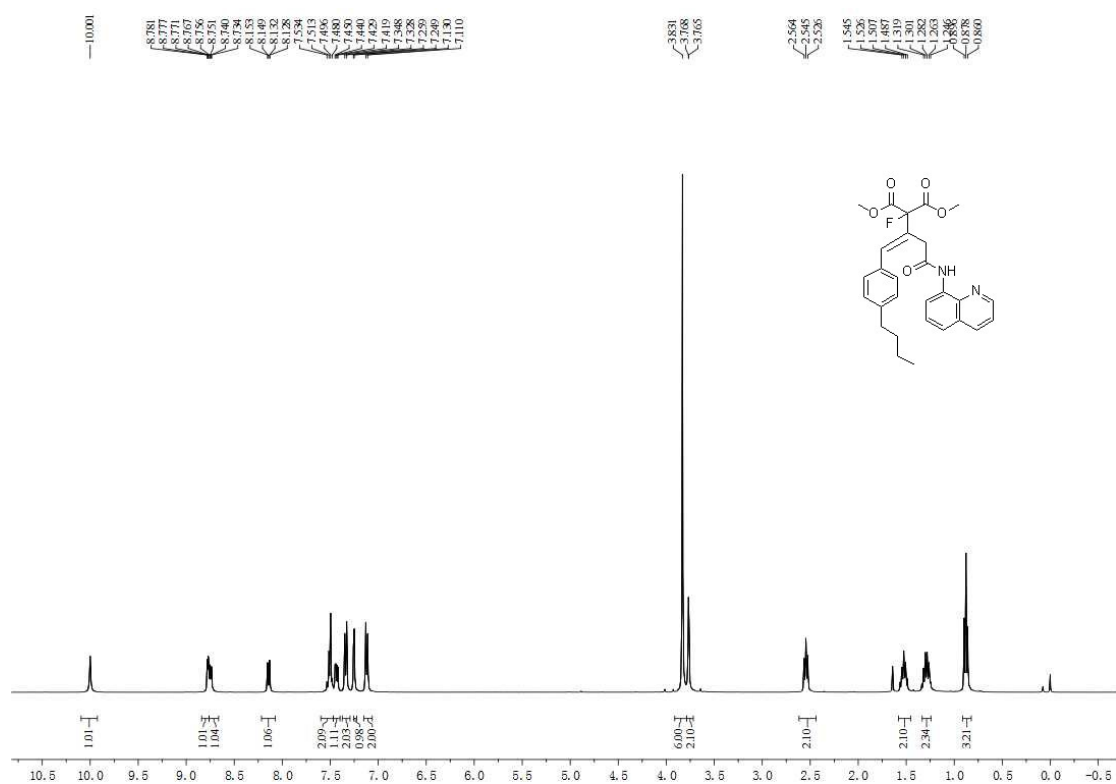

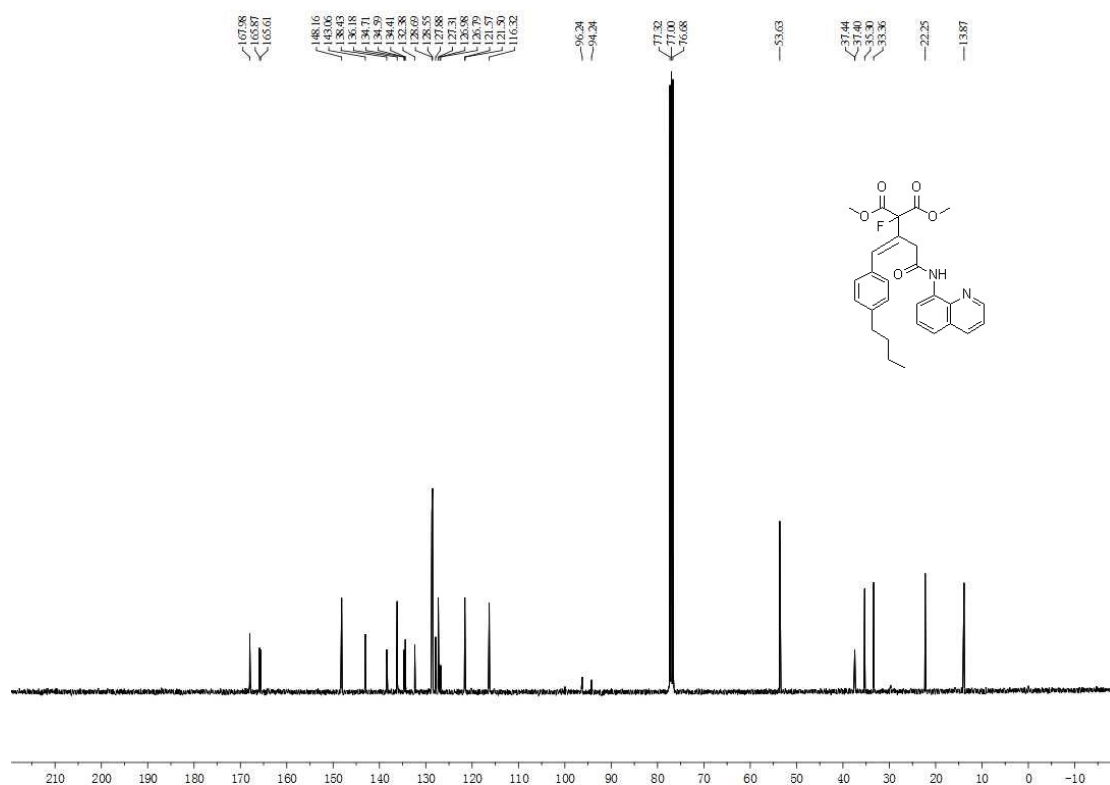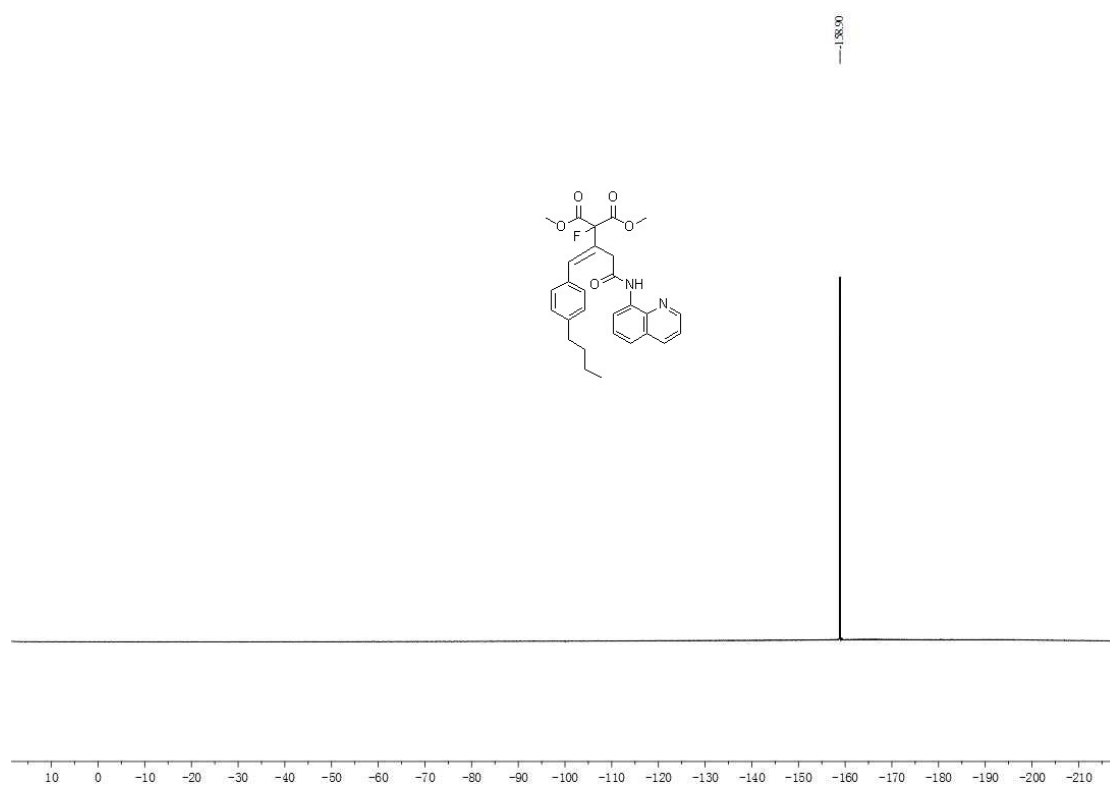

# Product 4i

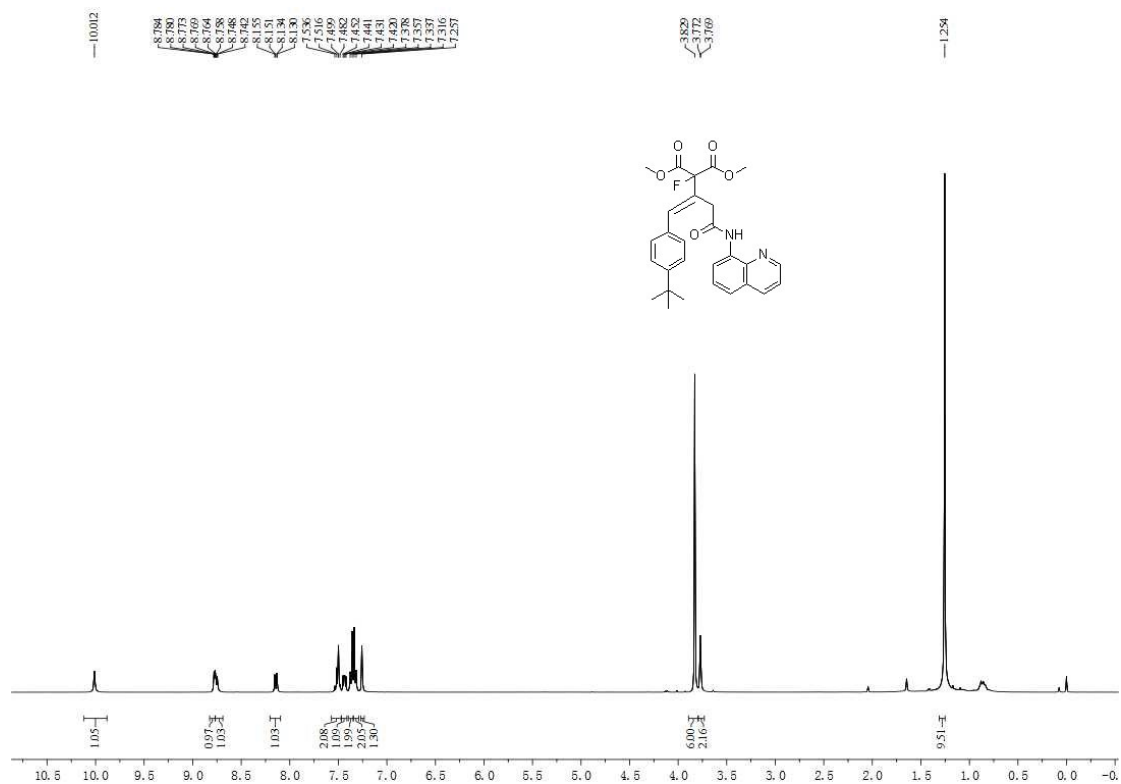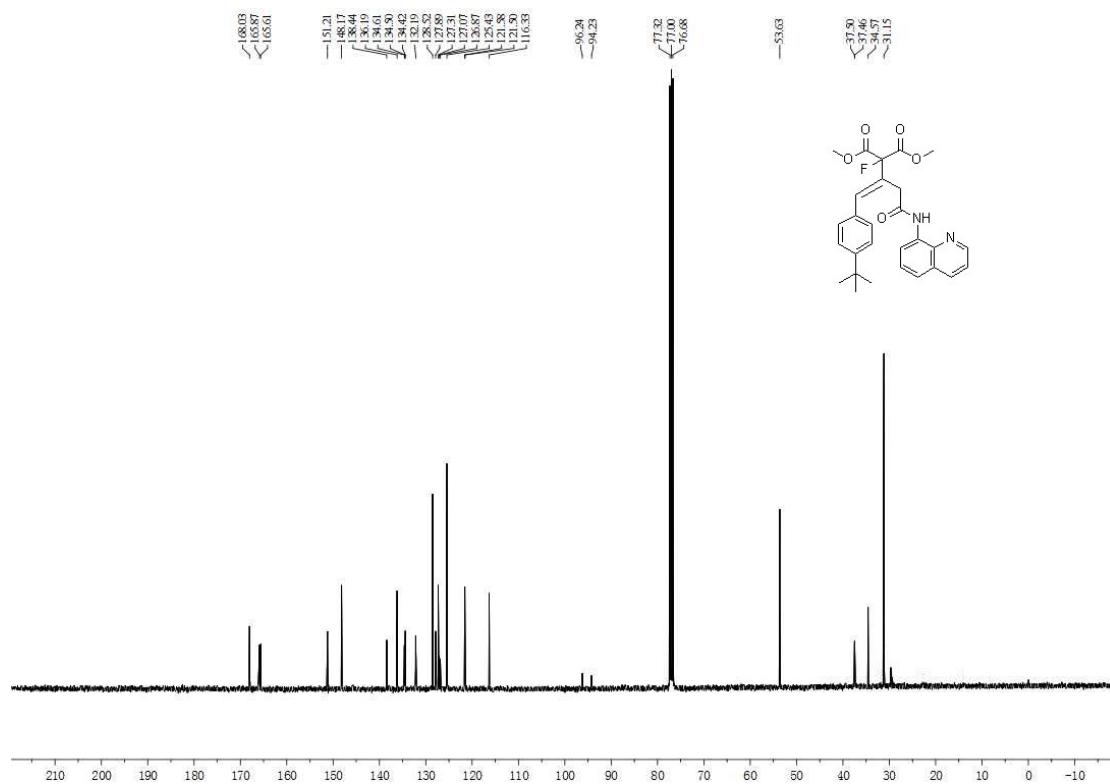

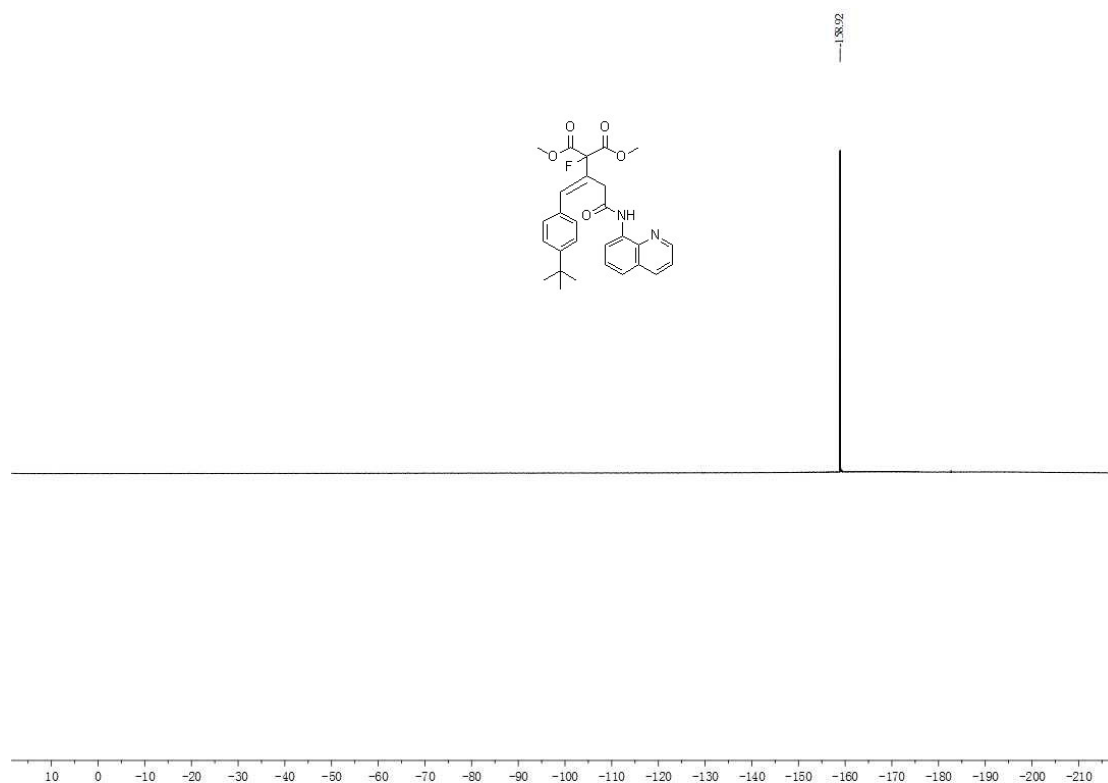

## Product 4j

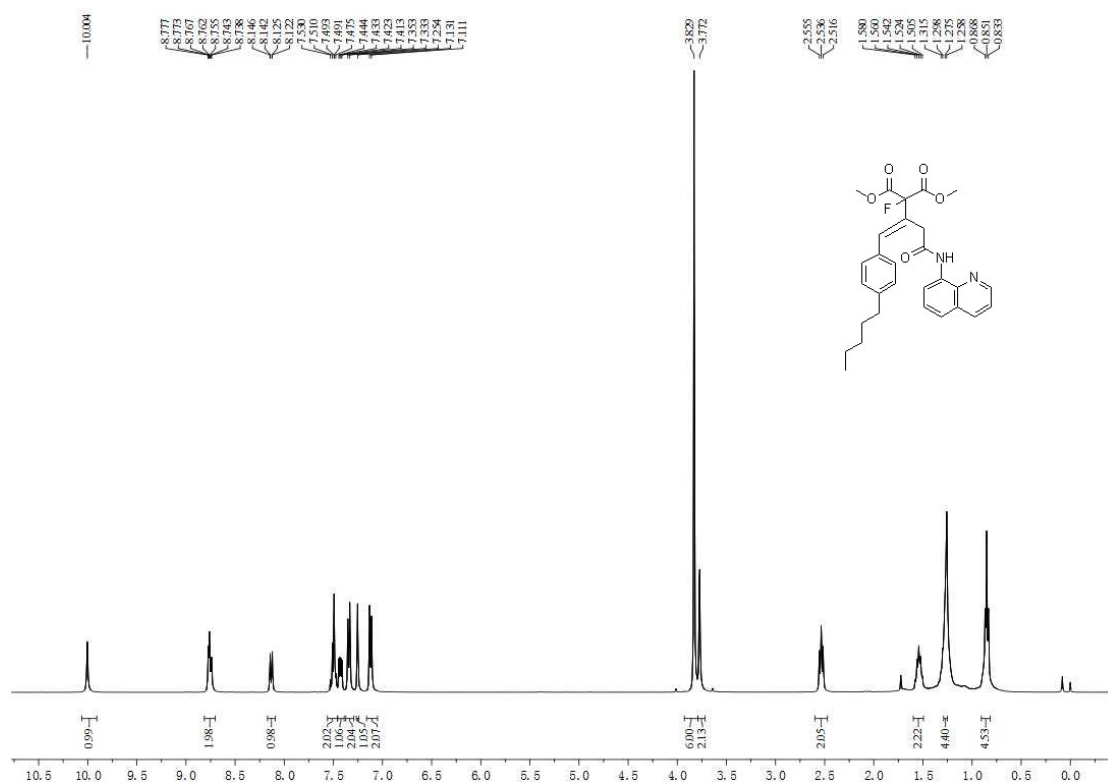

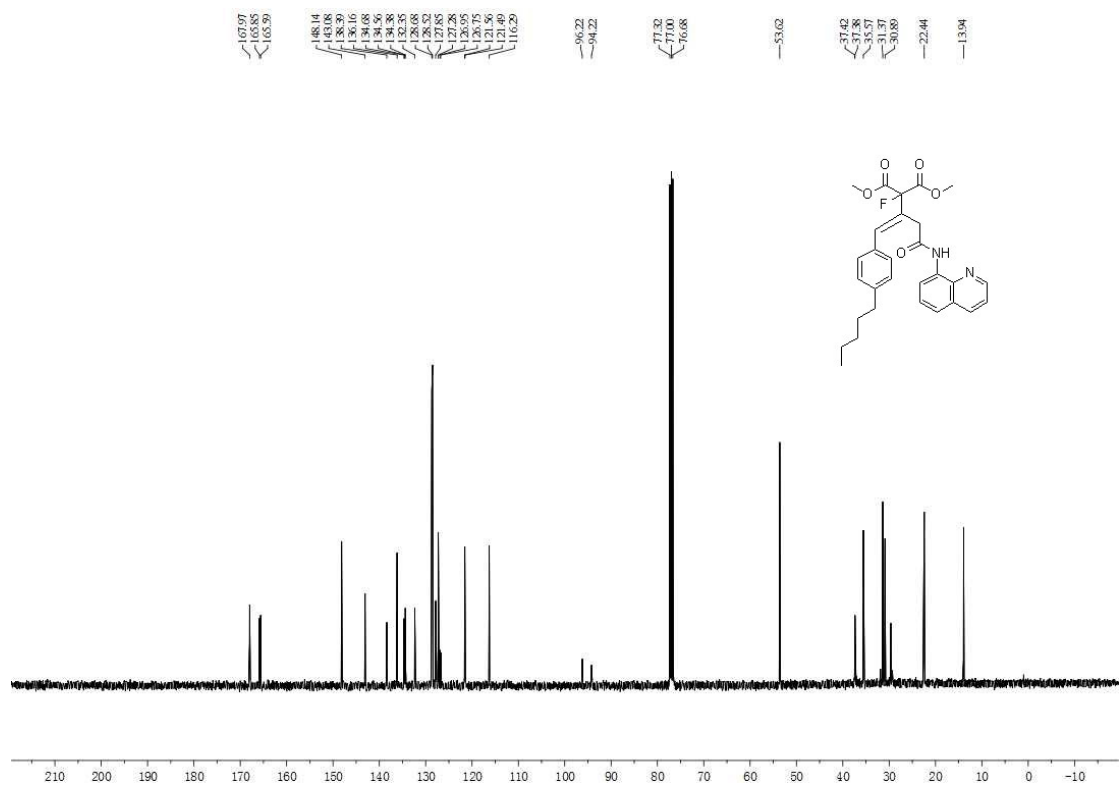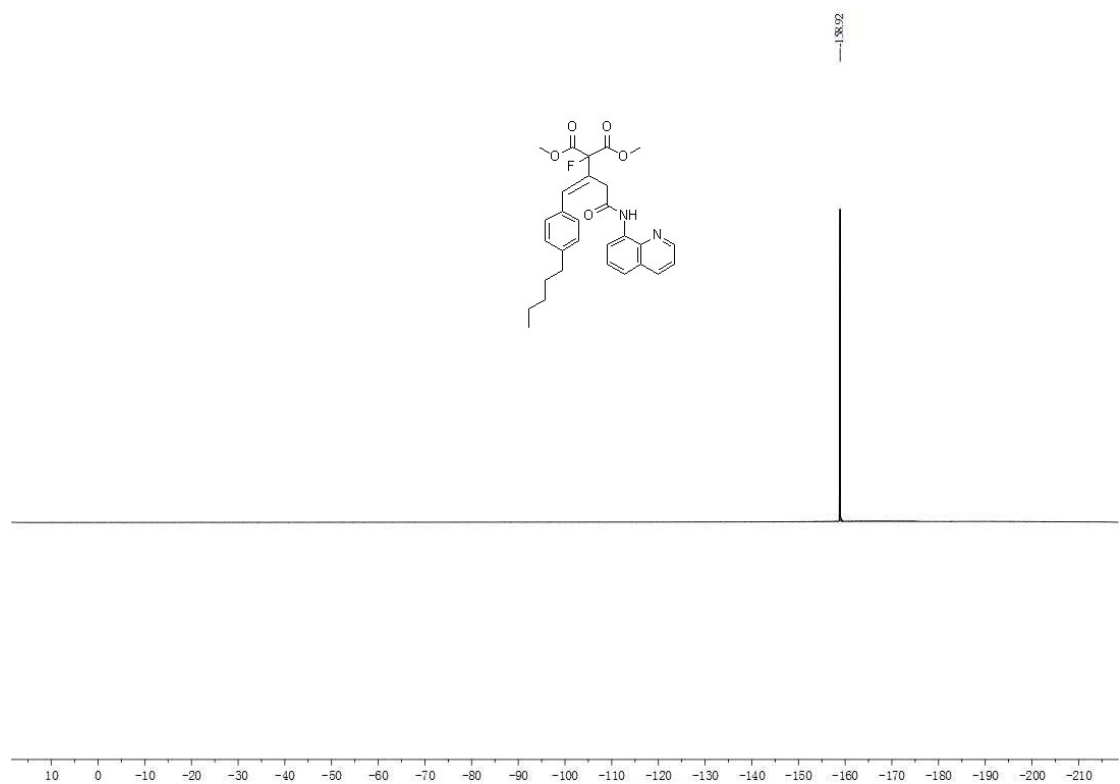

# Product 4k

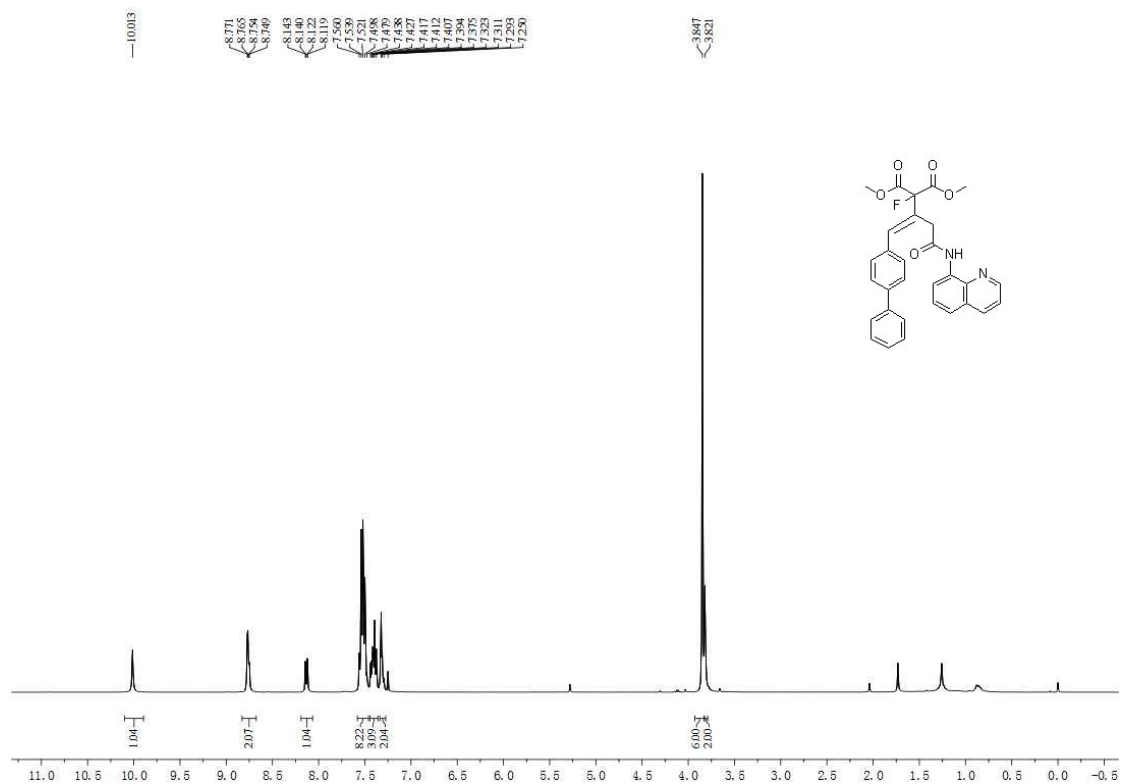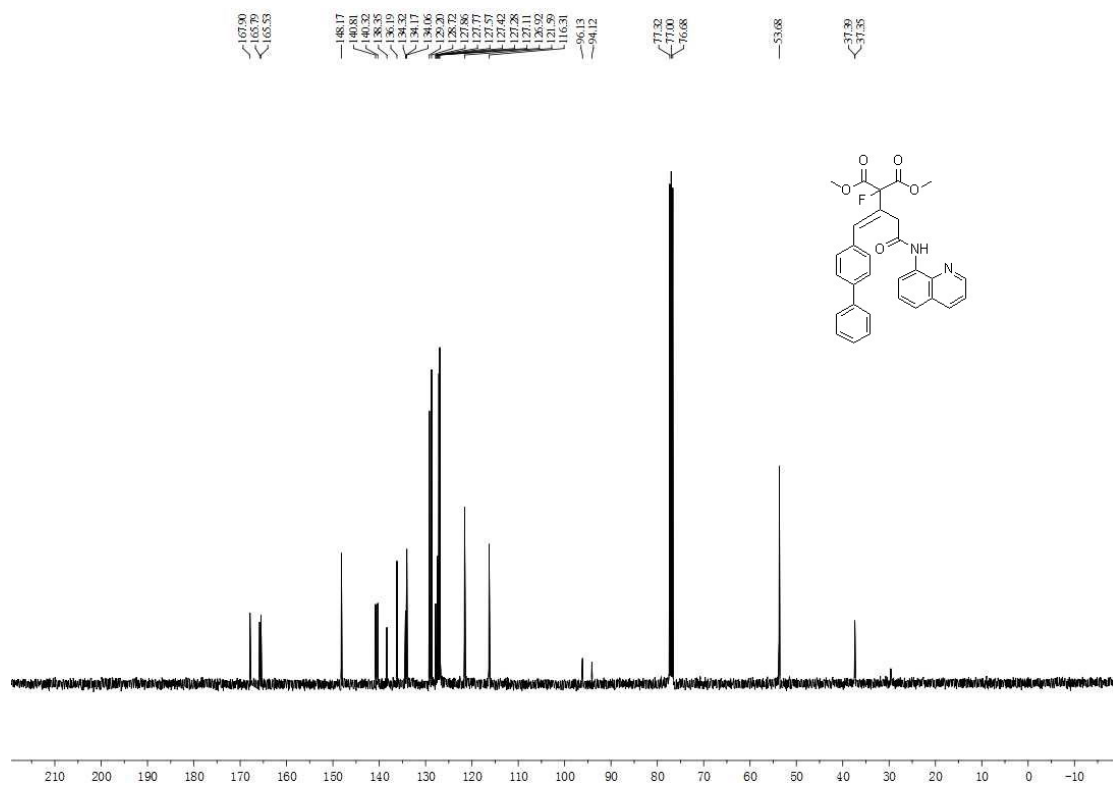

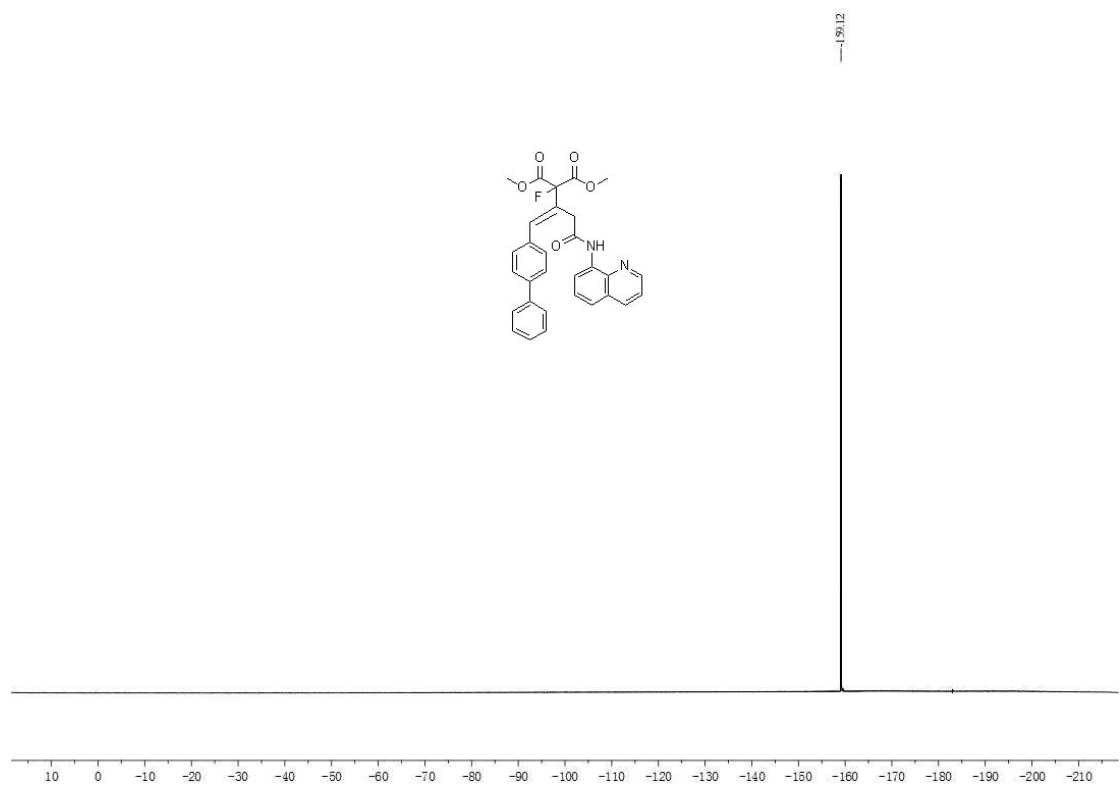

## Product 4l

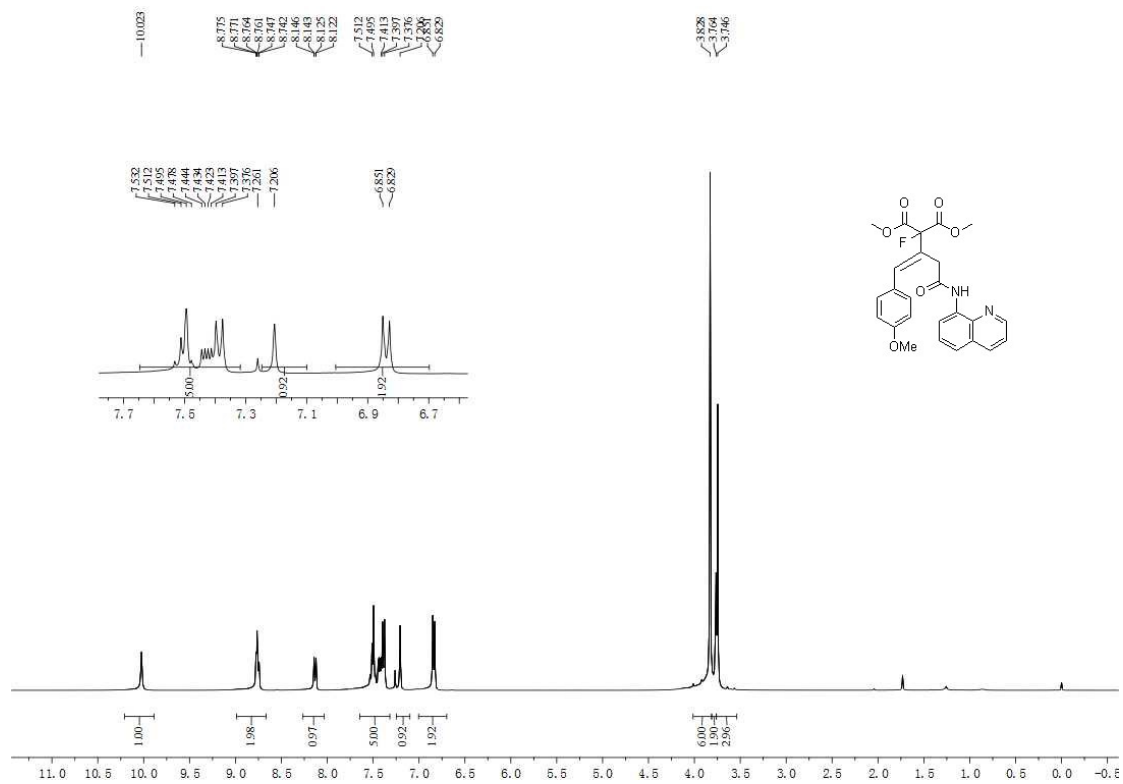



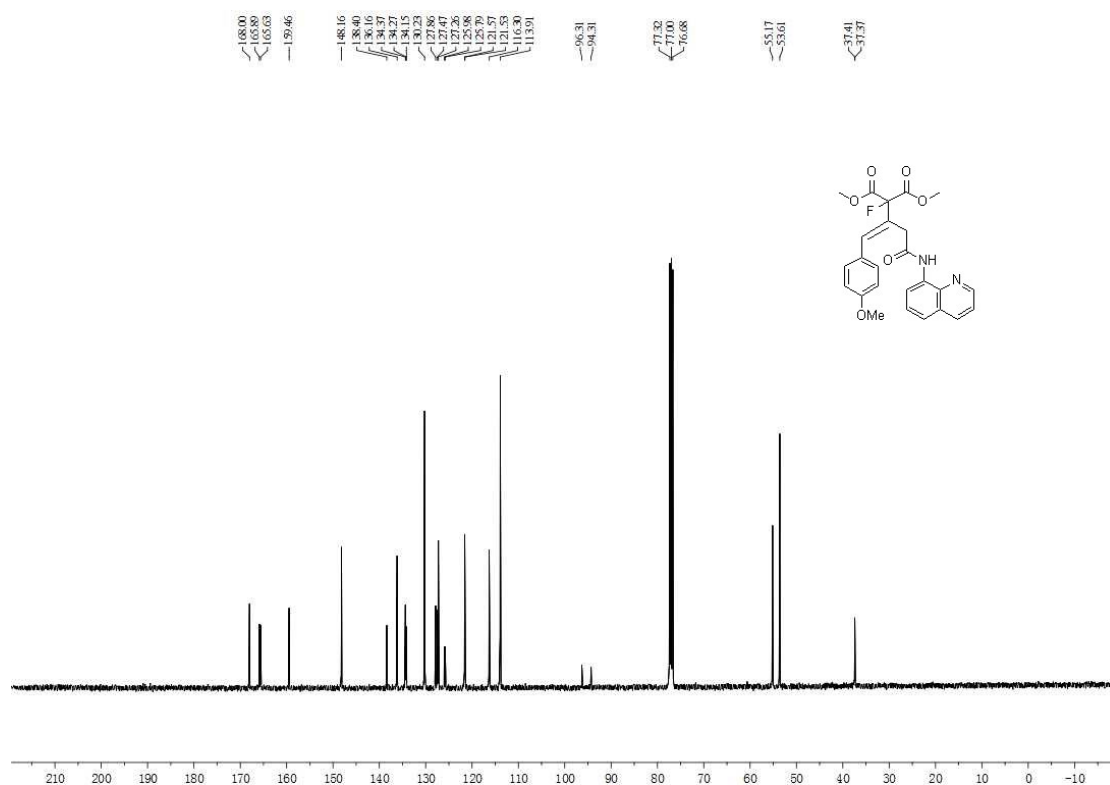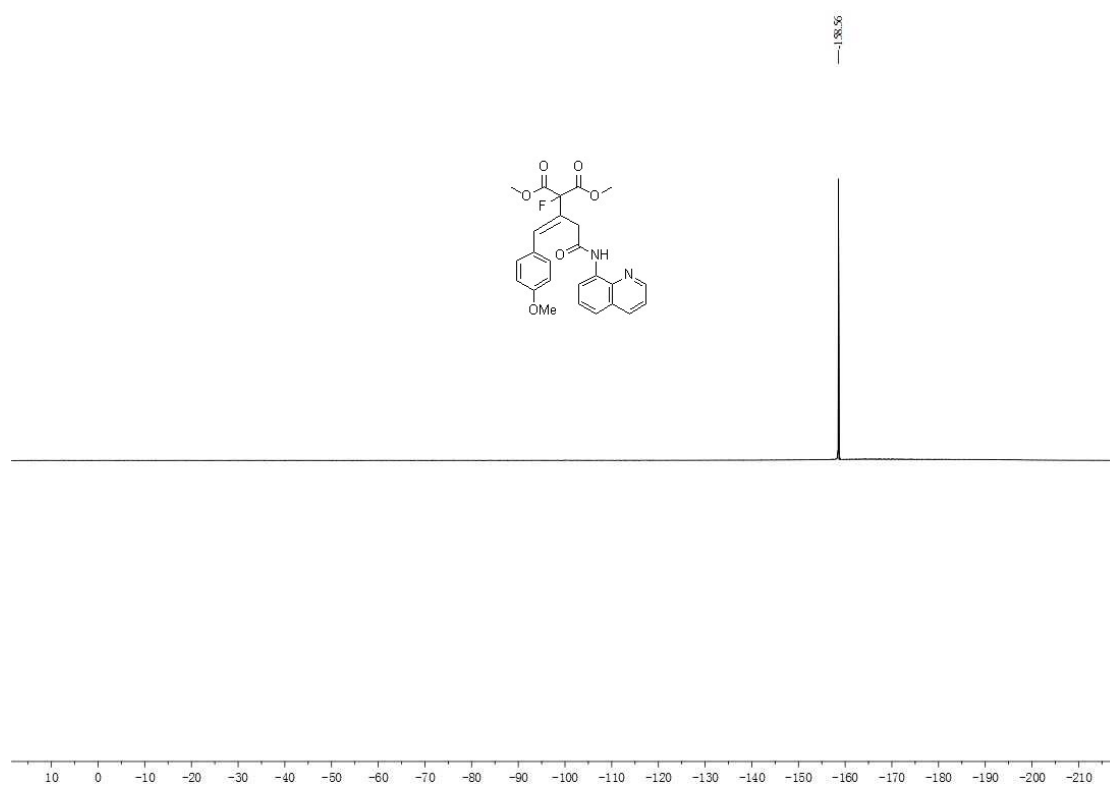

# Product 4m

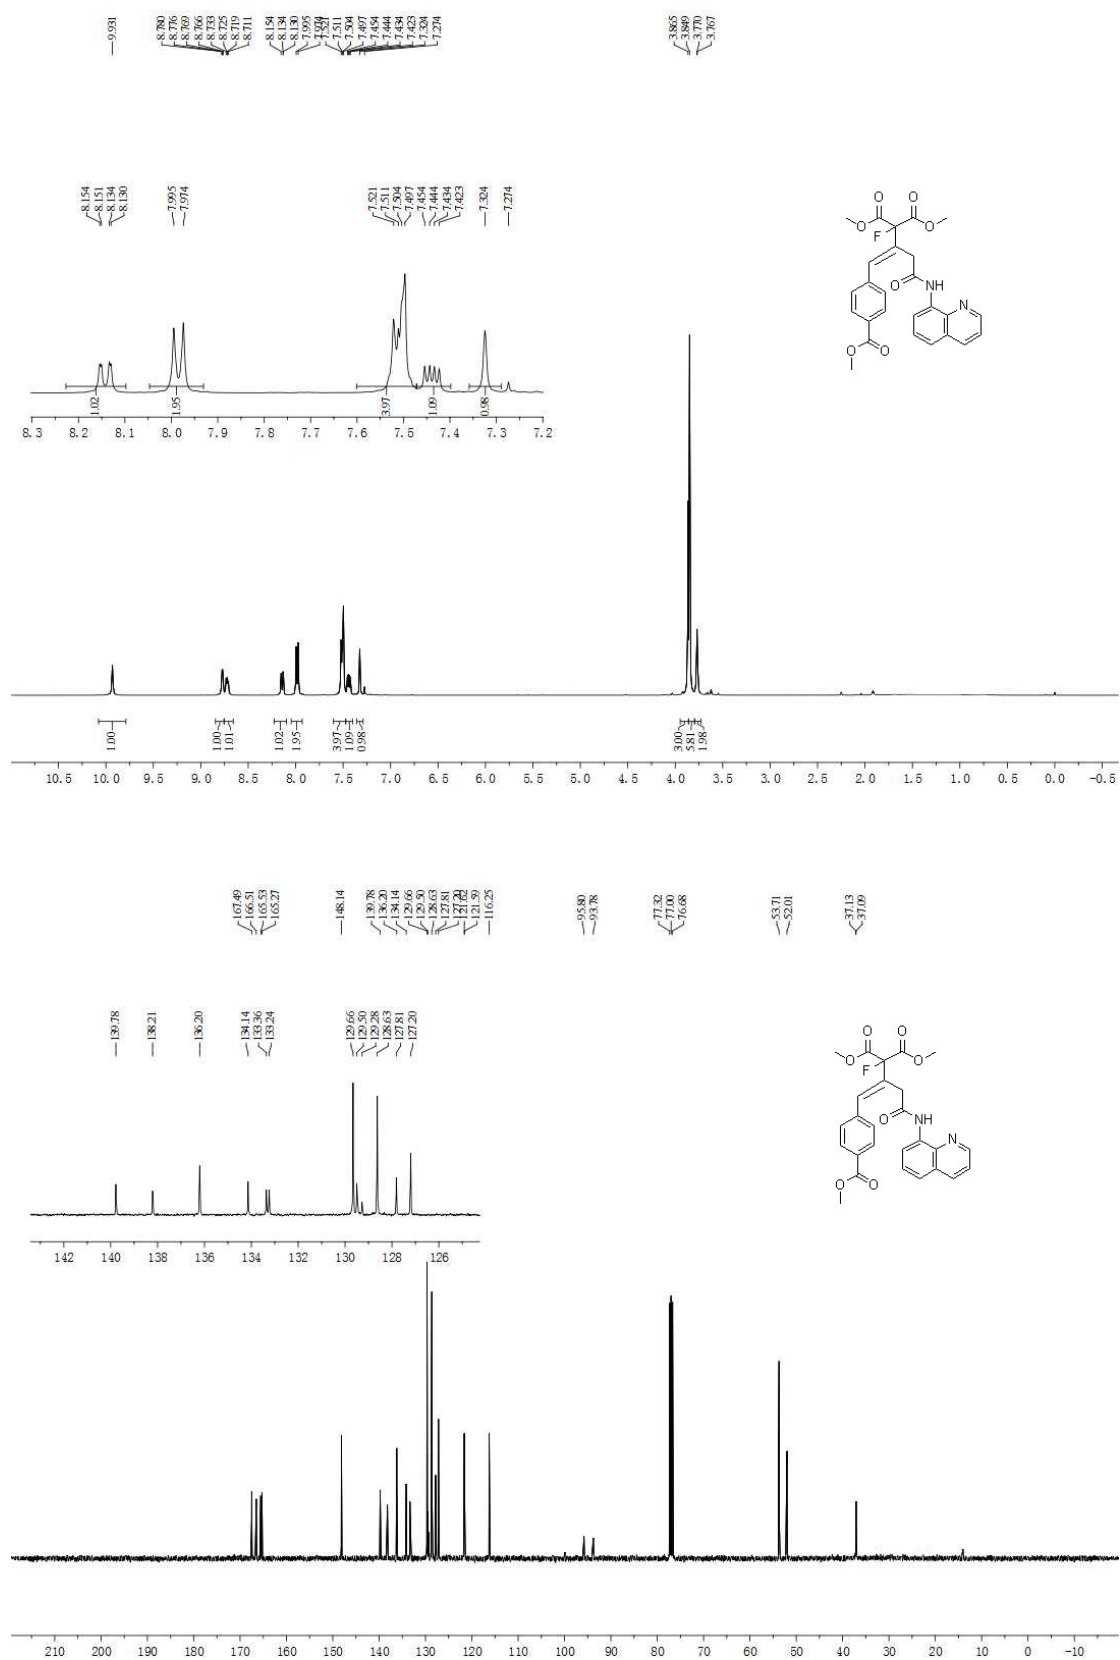

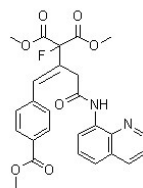

**<sup>1</sup>H NMR spectrum (CDCl<sub>3</sub>) of compound 10:**

**Chemical structure of compound 10:**

COC(=O)C(F)(C(=O)OC)C(=O)Nc1ccc2ccncc2c1

**Peak list (ppm):** 8.171, 8.167, 8.150, 8.147, 8.129, 8.125, 8.122, 8.112, 8.101, 8.107, 8.100, 8.090, 7.815, 7.612, 7.592, 7.586, 7.530, 7.508, 7.460, 7.439, 7.430, 7.384, 7.365, 7.266.

**Integration values:** 0.98, 0.91, 1.18, 0.99, 1.11, 2.02, 2.01, 2.00, 1.24, 1.04, 6.00, 2.03.

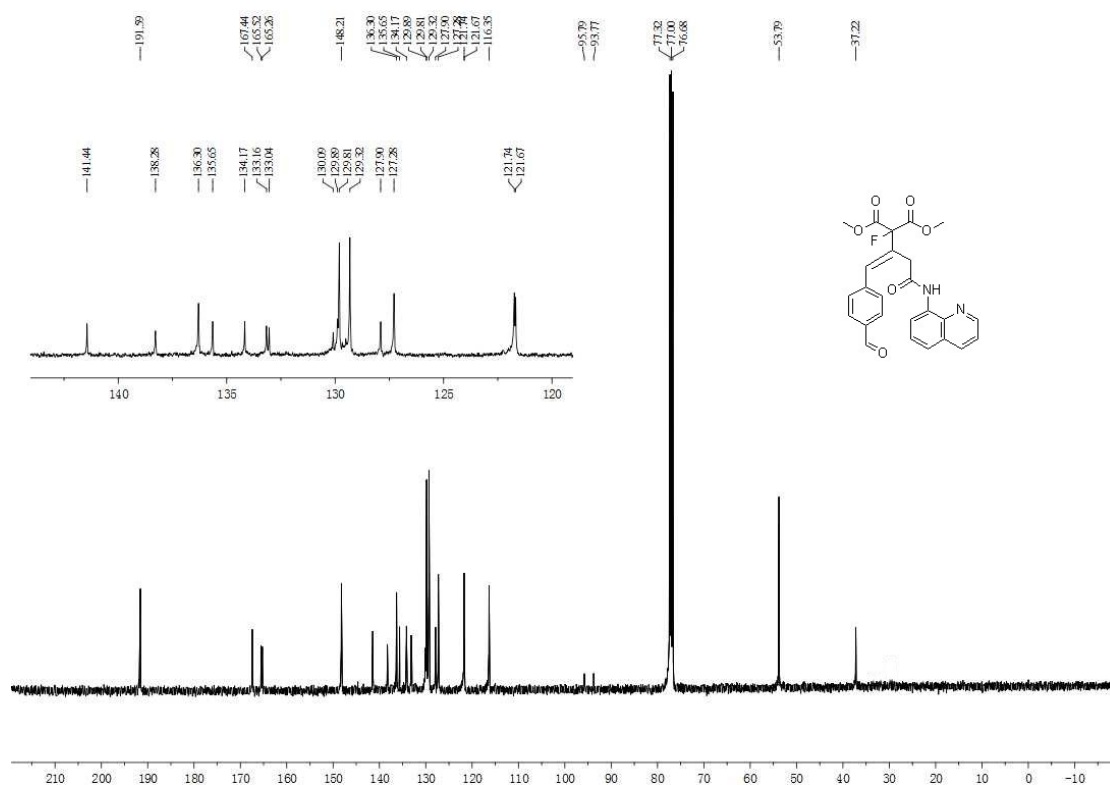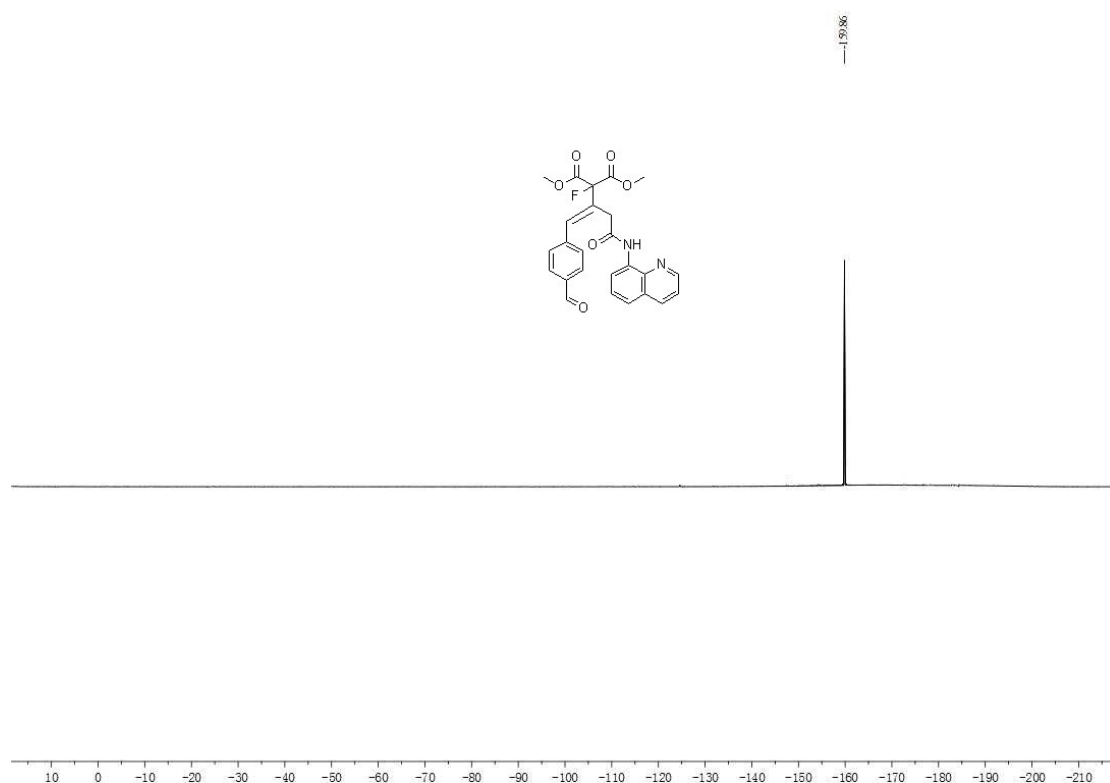

Chemical structure of compound 10 is shown above the spectrum:

COC(=O)C(F)=C(OC(=O)c1ccc(F)cc1)C(=O)Nc2ccc3ccncc3c2

<sup>1</sup>H NMR spectrum (CDCl<sub>3</sub>) of compound 10. The x-axis represents chemical shift in ppm, ranging from 0.0 to 10.0. The spectrum shows several peaks corresponding to the structure, with integration values indicated below the baseline.

Chemical structure of compound 10 is shown above the spectrum:

COC(=O)C(F)=C(OC(=O)c1ccc(F)cc1)C(=O)Nc2ccc3ccncc3c2

<sup>1</sup>H NMR spectrum (CDCl<sub>3</sub>) of compound 10. The x-axis represents chemical shift in ppm, ranging from 0.0 to 10.0. The spectrum shows several peaks corresponding to the structure, with integration values indicated below the baseline.

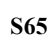

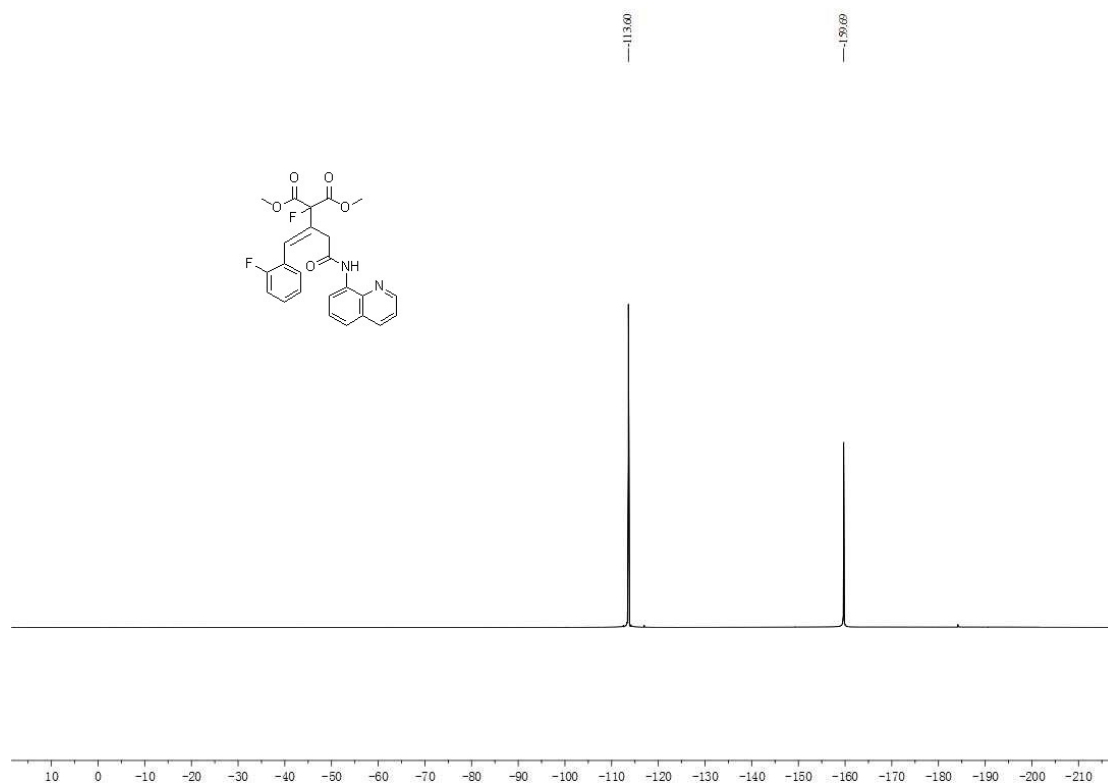

## Product 4p

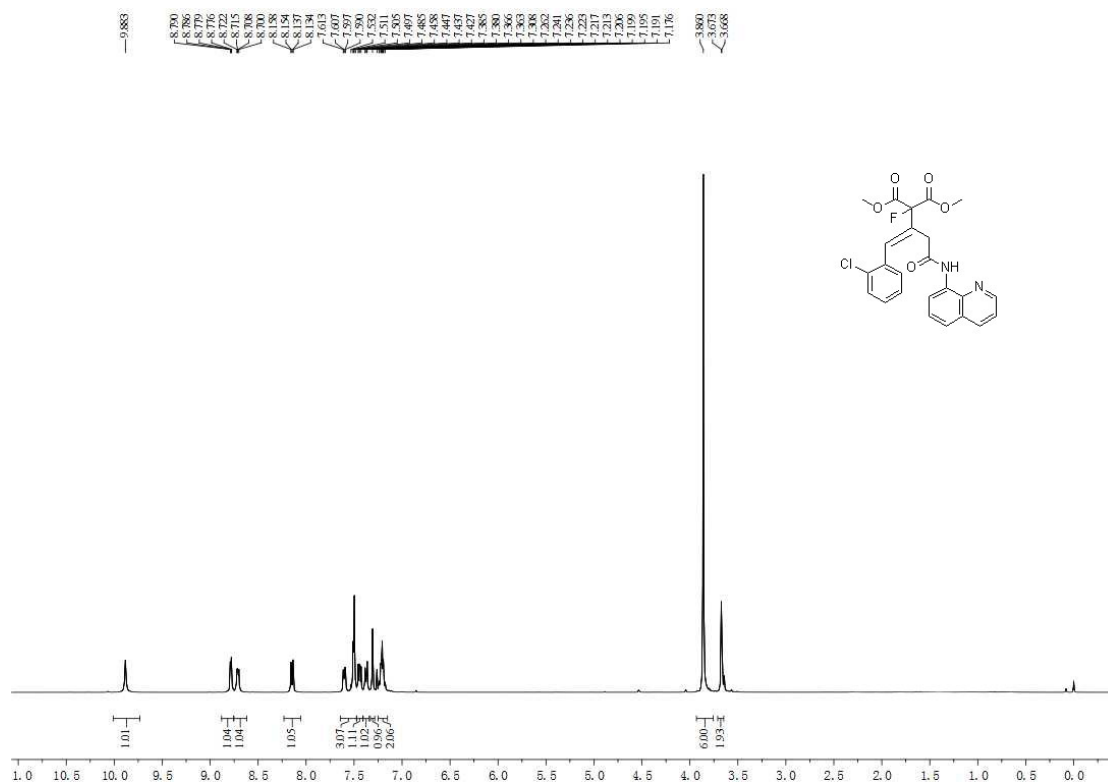

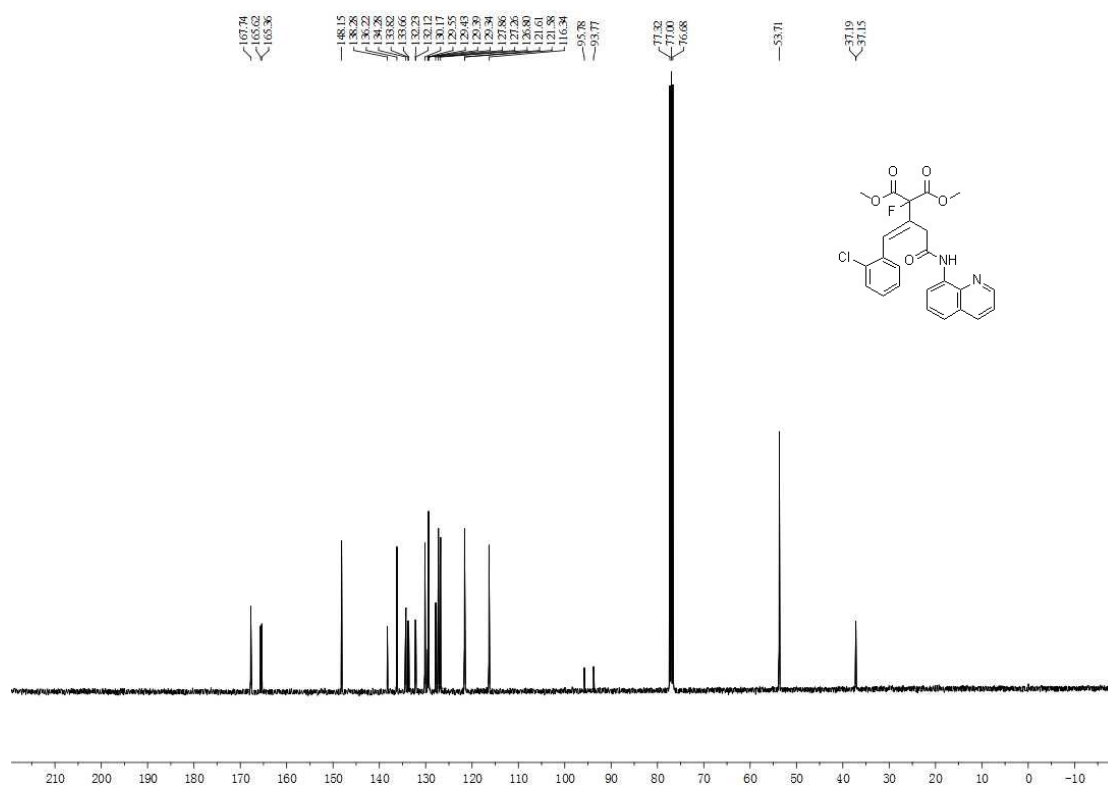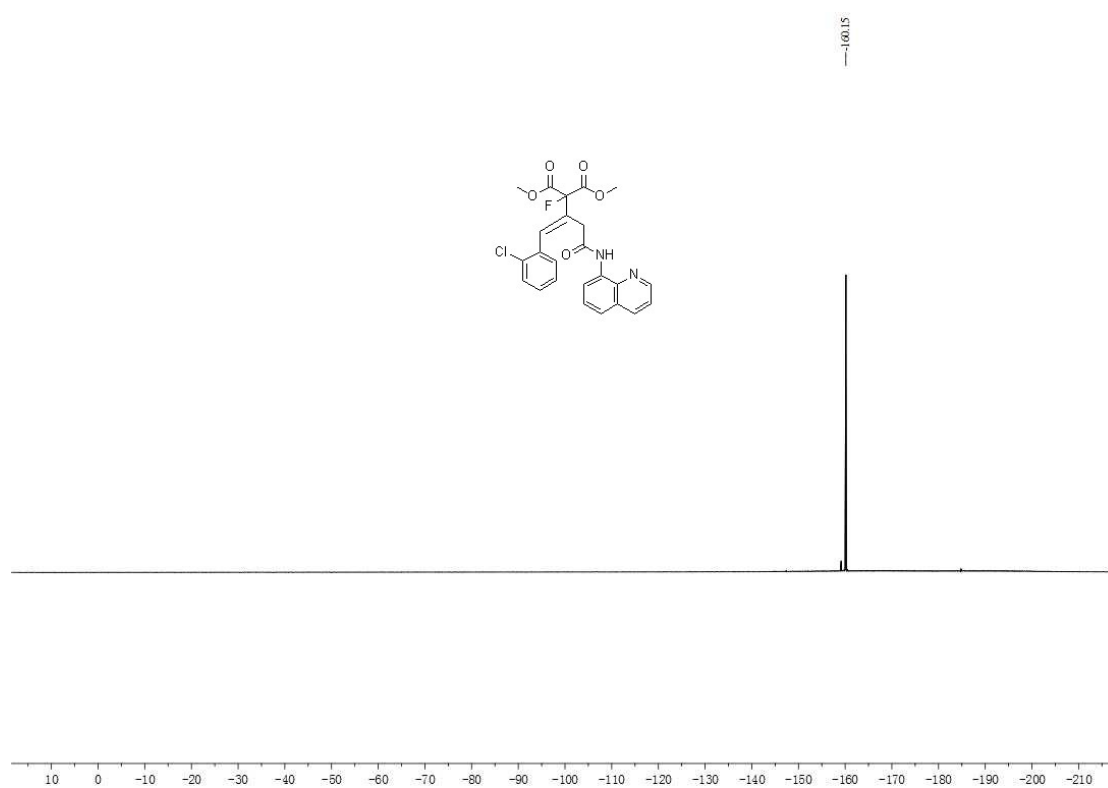

Chemical structure of compound 10: COC(=O)C(F)(C(=O)OC)C(=O)Nc1ccc2ccncc2c1

<sup>1</sup>H NMR spectrum (CDCl<sub>3</sub>) of compound 10. The x-axis represents the chemical shift in ppm, ranging from 0.0 to 11.0. The spectrum shows several multiplets in the aromatic region (6.8–8.0 ppm) and two singlets in the aliphatic region (3.7–3.9 ppm). Integration values are provided below the baseline.

Chemical shift data (ppm):

- 8.780, 8.785, 8.788, 8.774, 8.755, 8.717, 8.701, 8.708, 8.647, 8.645, 8.635, 8.632
- 7.300, 7.289, 7.284, 7.249, 7.241, 7.244, 6.856, 6.857, 6.823, 6.823
- 3.866, 3.875, 3.721, 3.703

Integration values (from left to right):

- 1.00
- 1.03, 1.01
- 1.05
- 2.96, 1.03, 0.97, 1.06, 0.96, 0.99
- 6.00, 1.93, 3.05

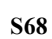



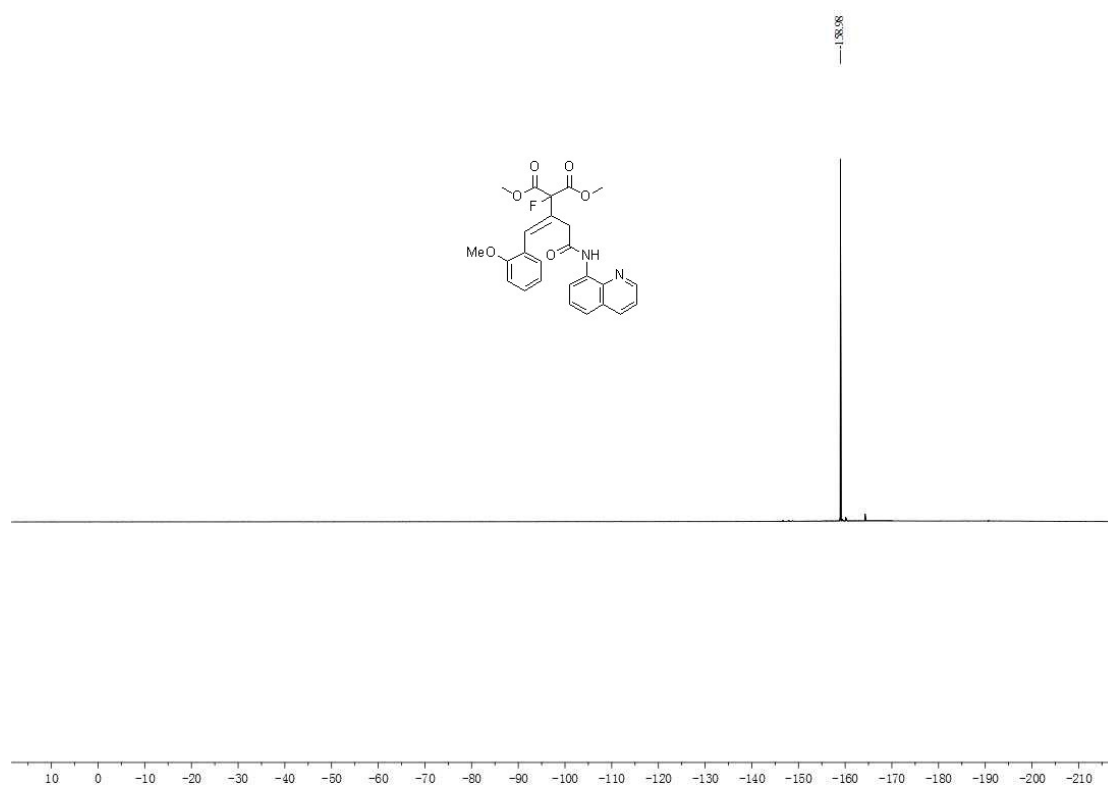

# **Product 4r**

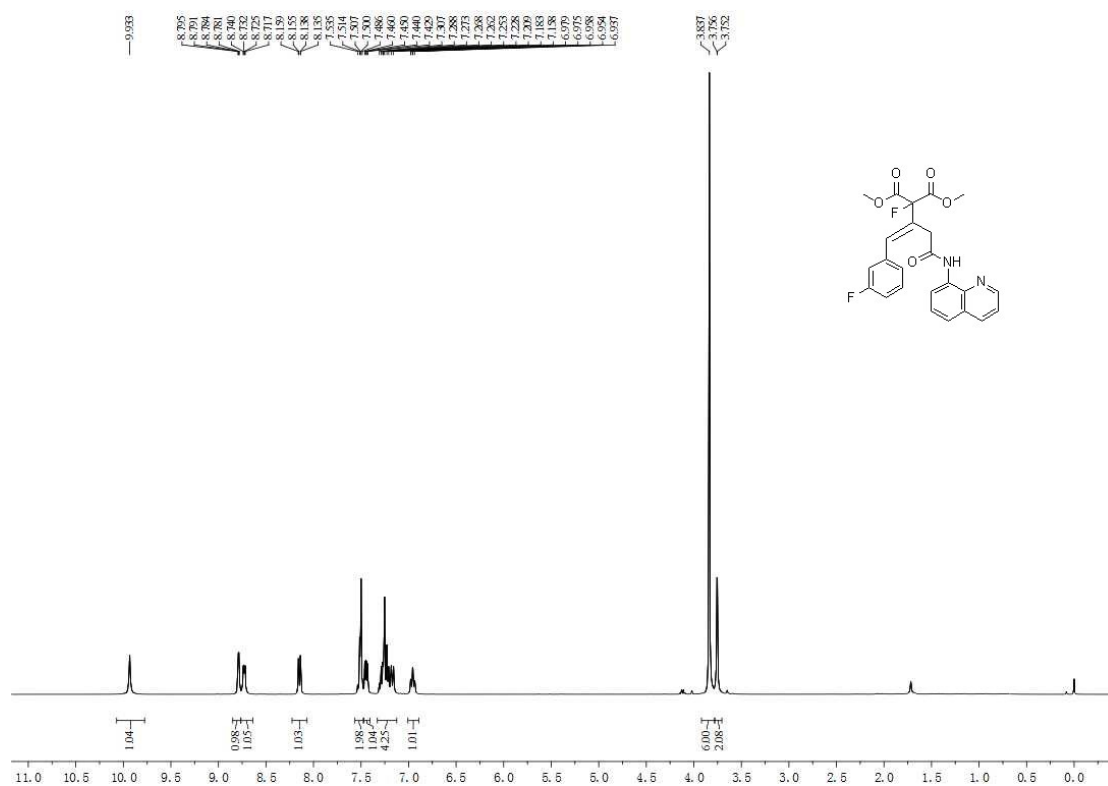

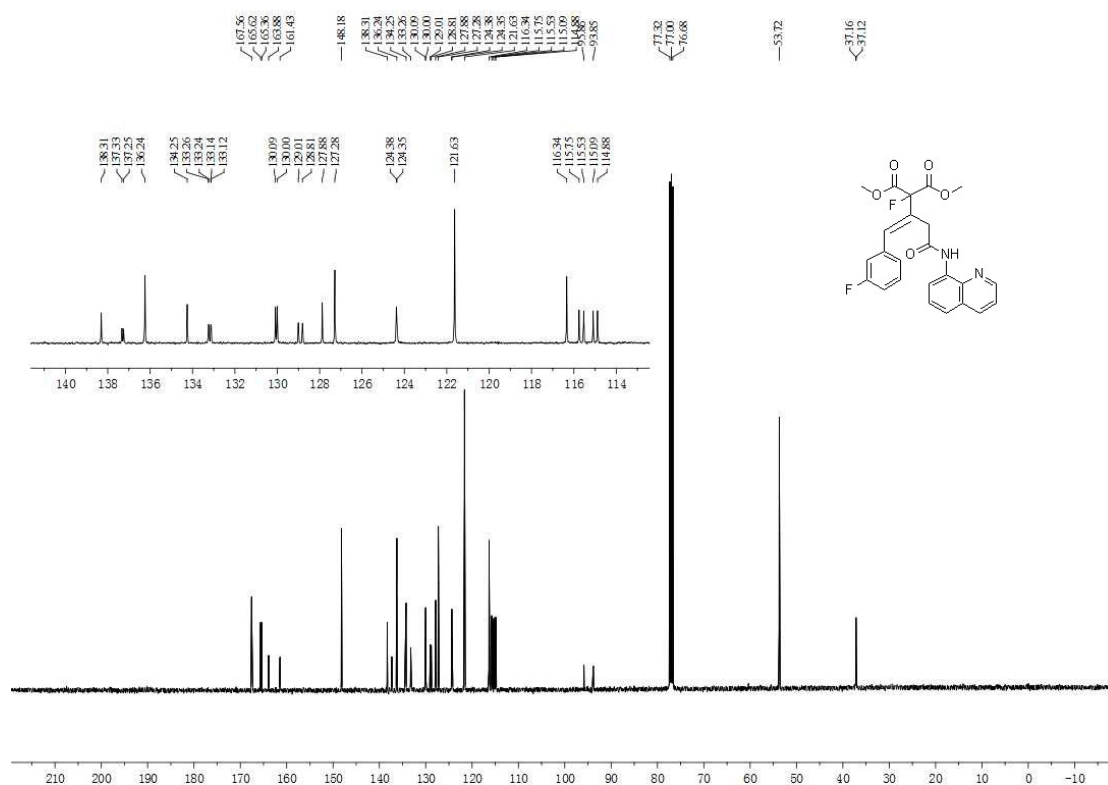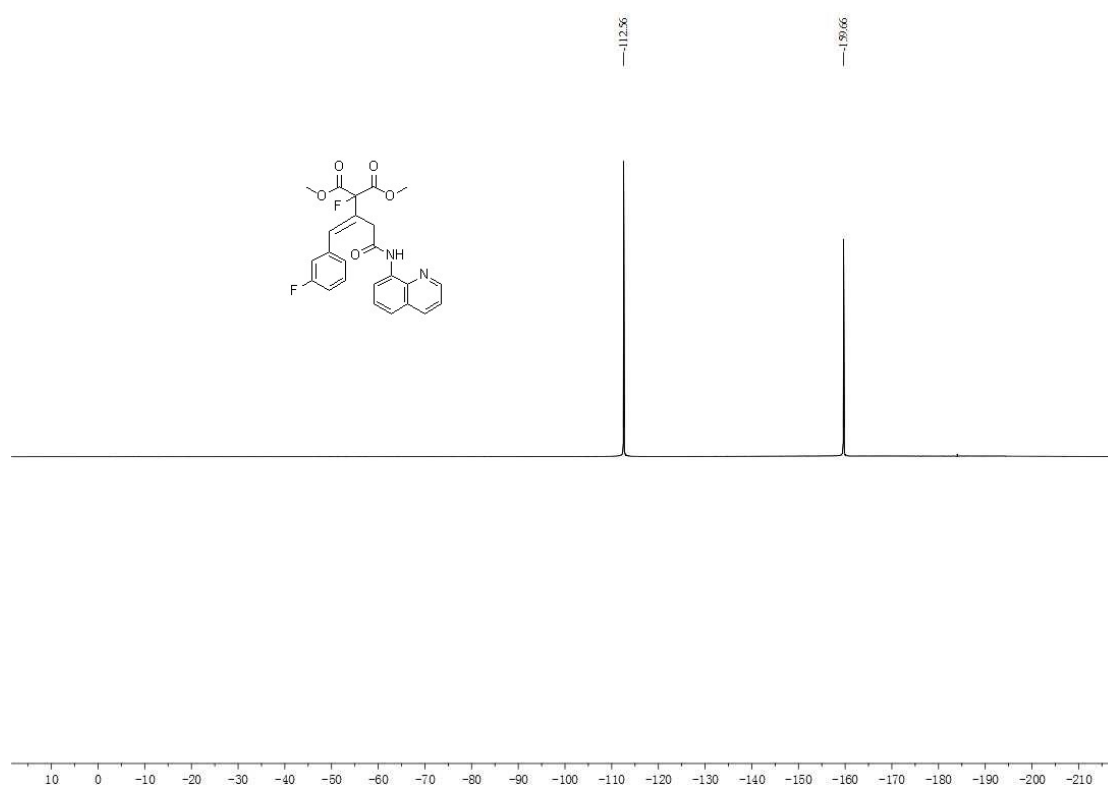

# Product 4s

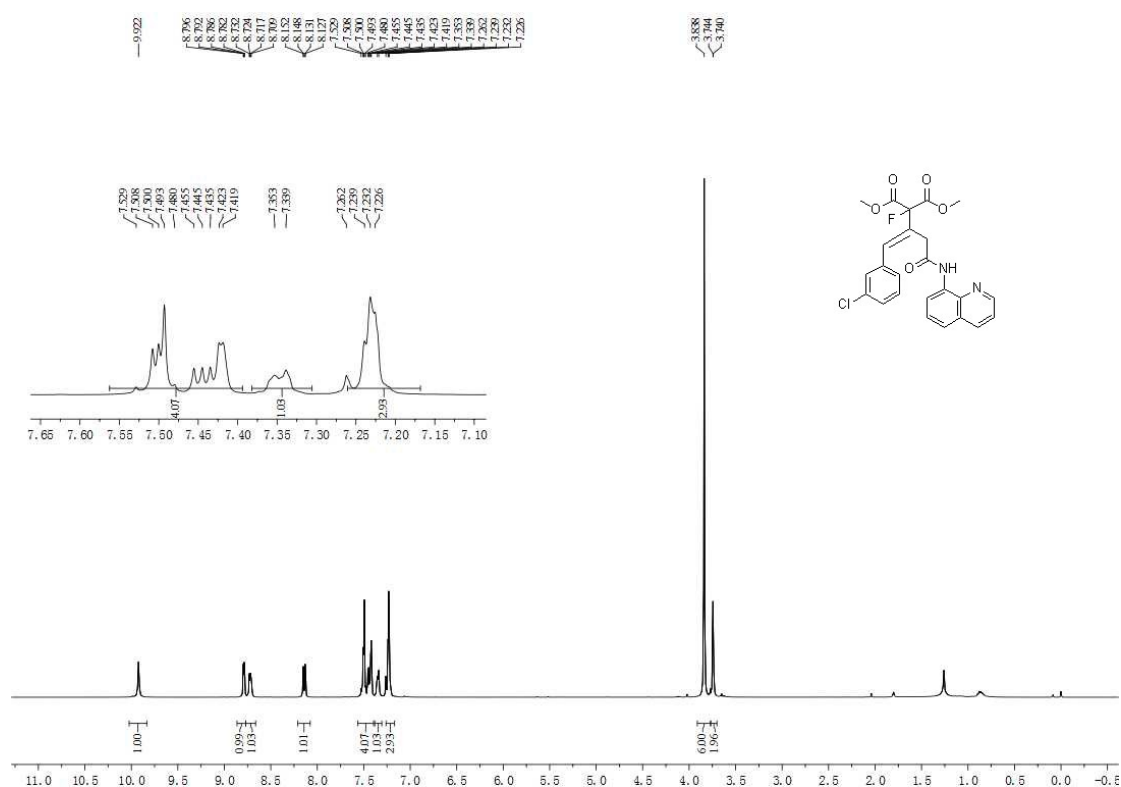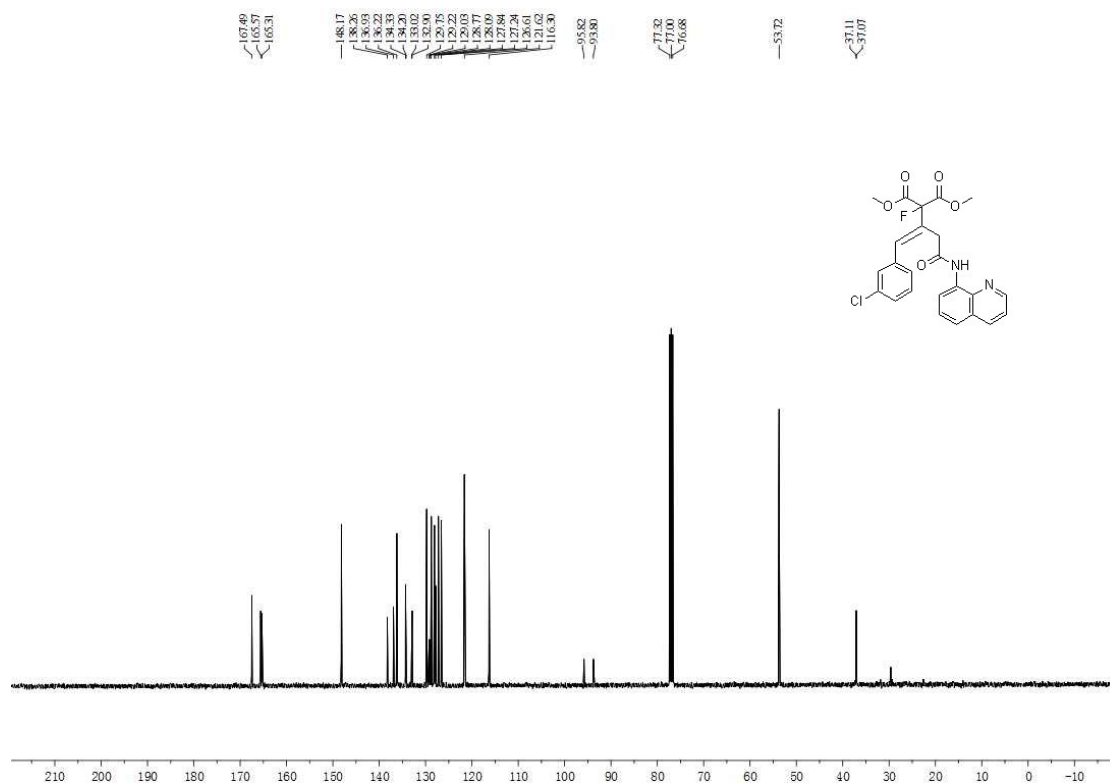

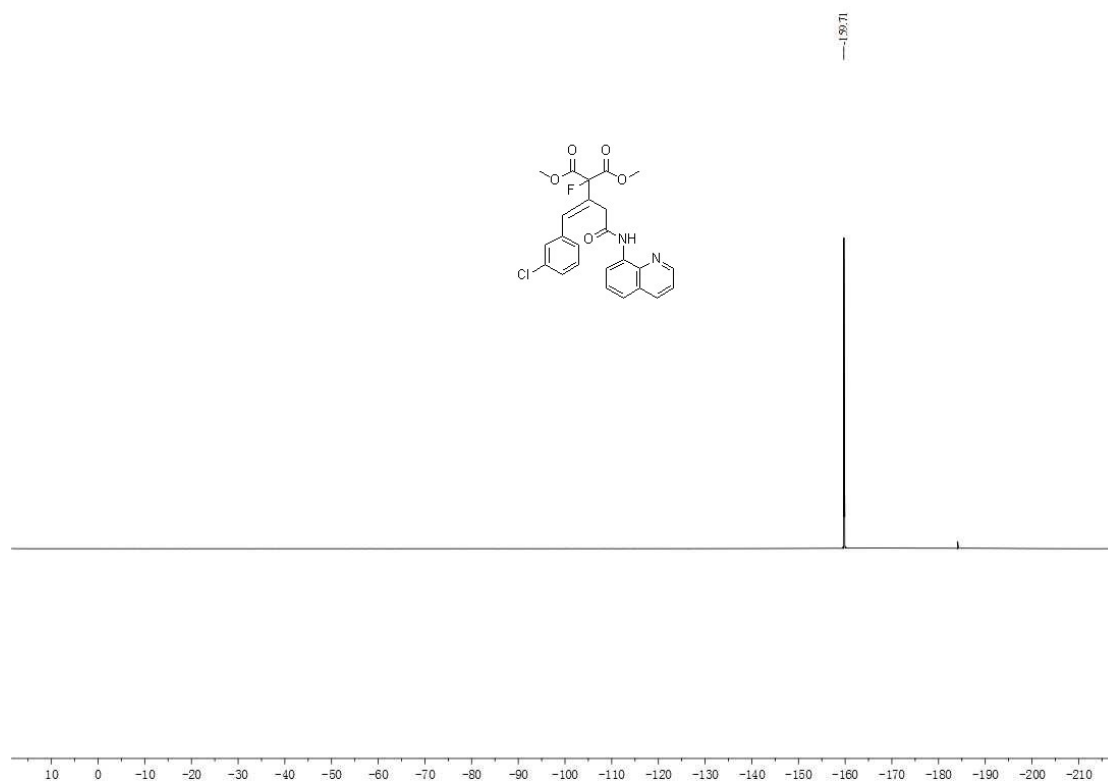

# **Product 4t**

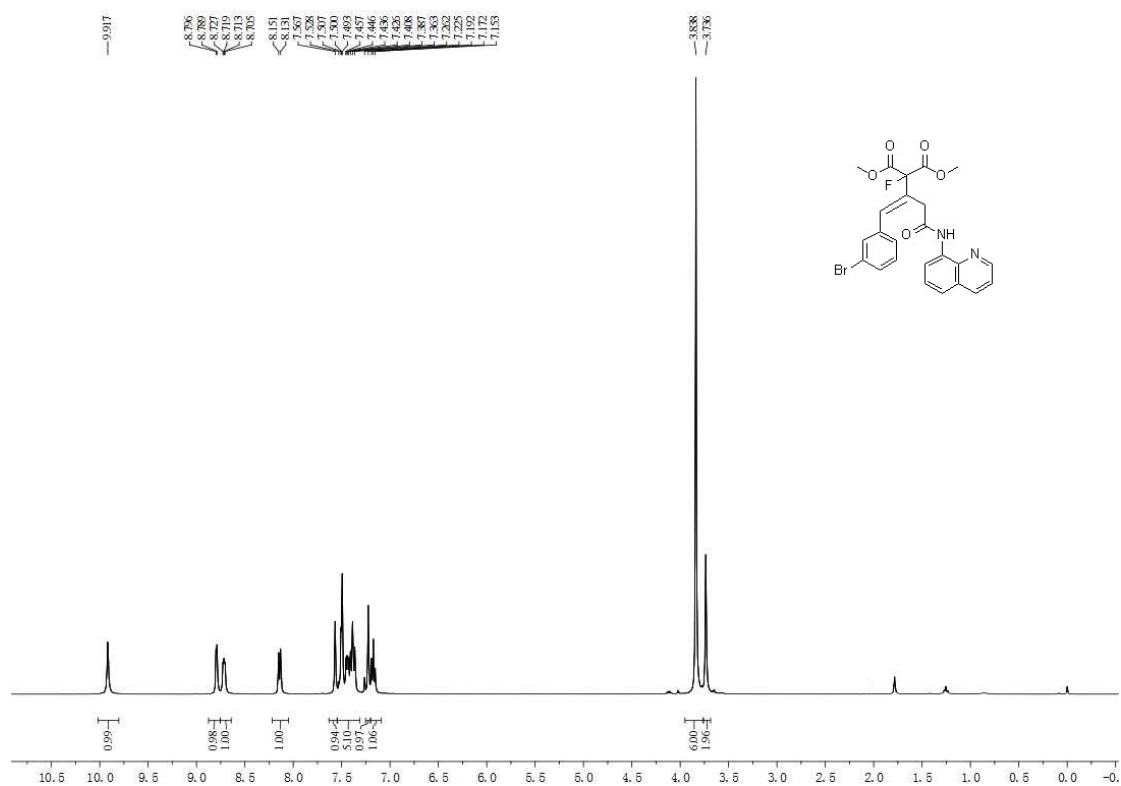

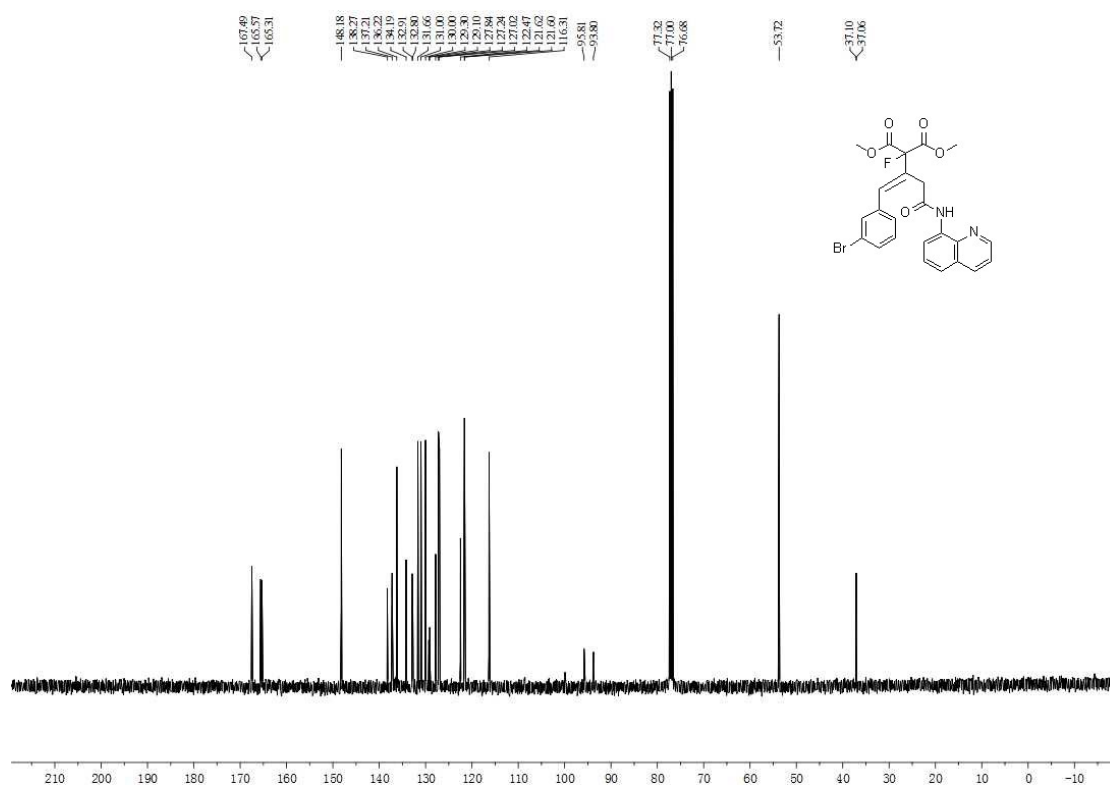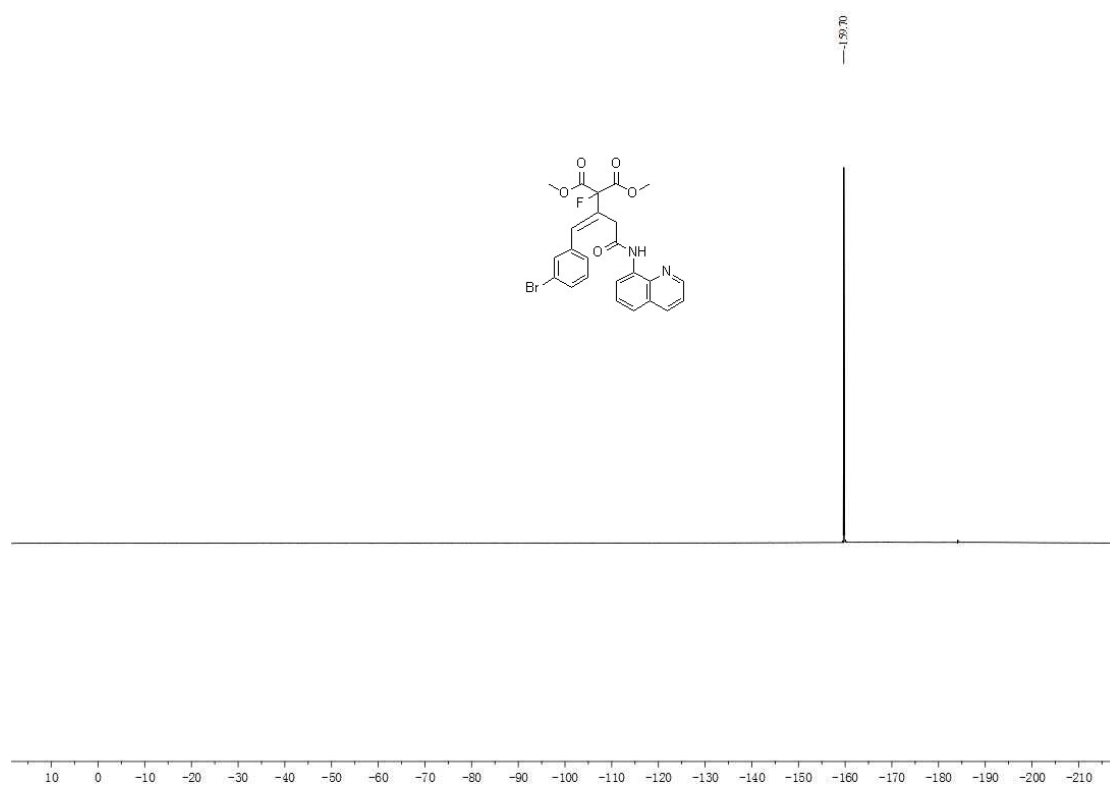

# Product 4u

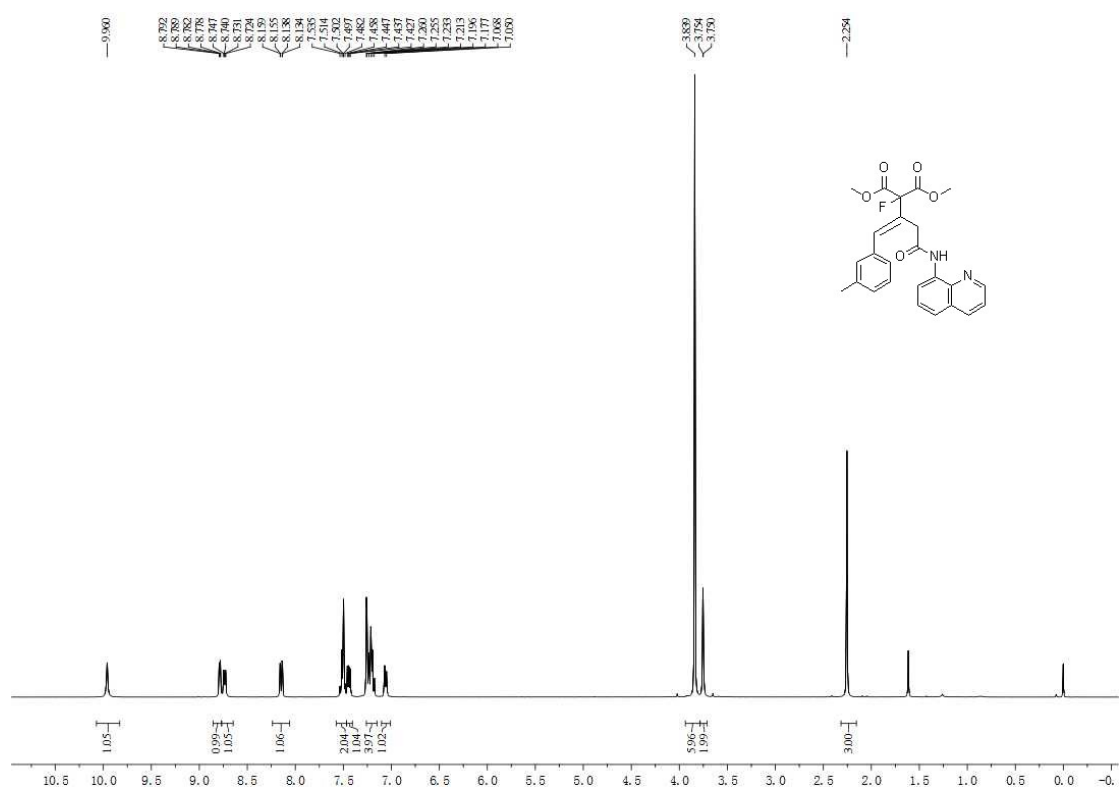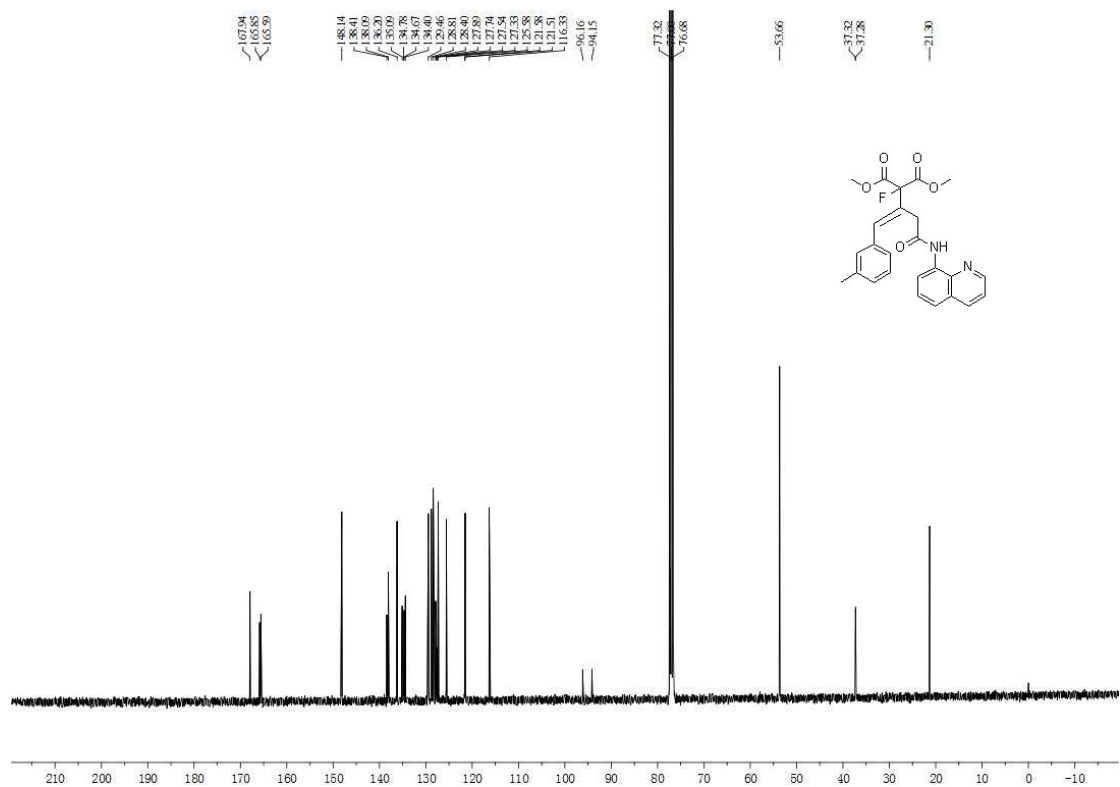

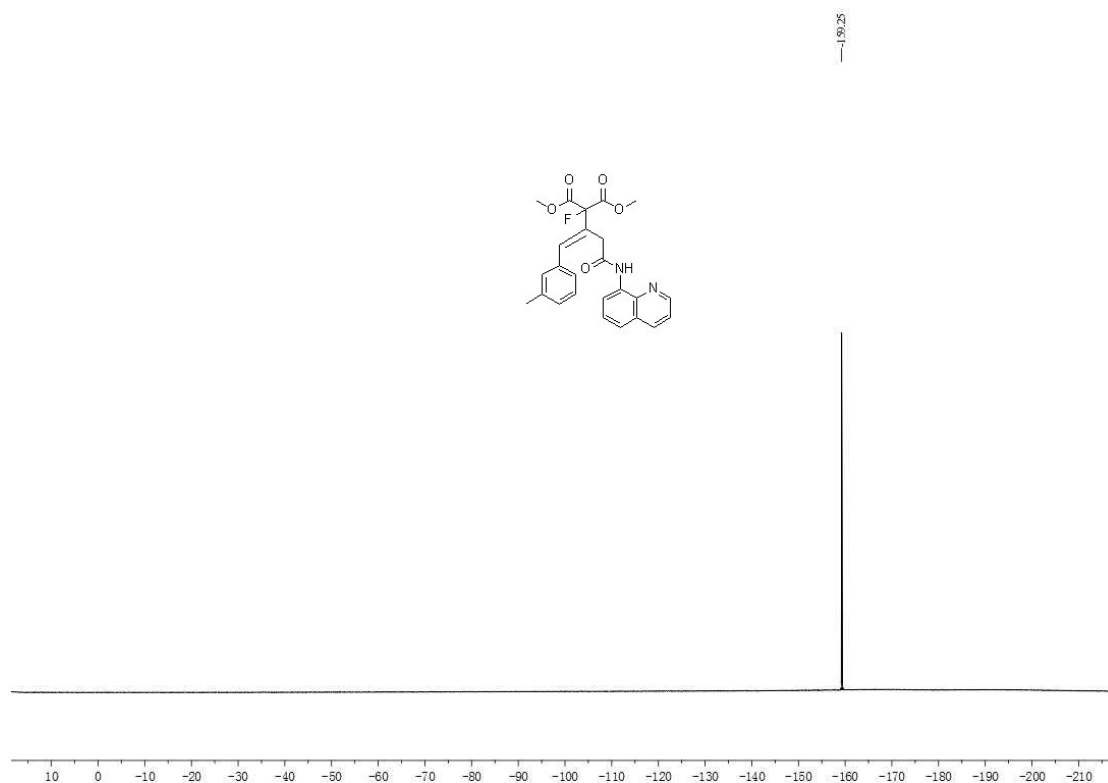

# **Product 4v**

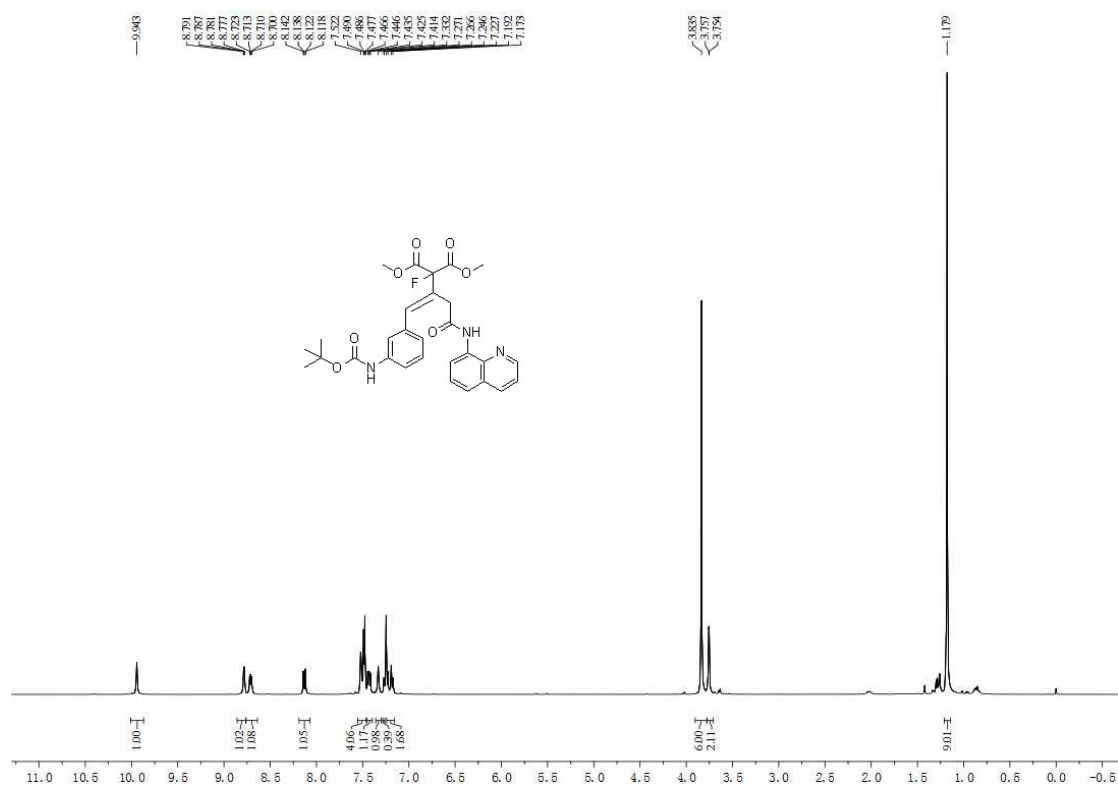

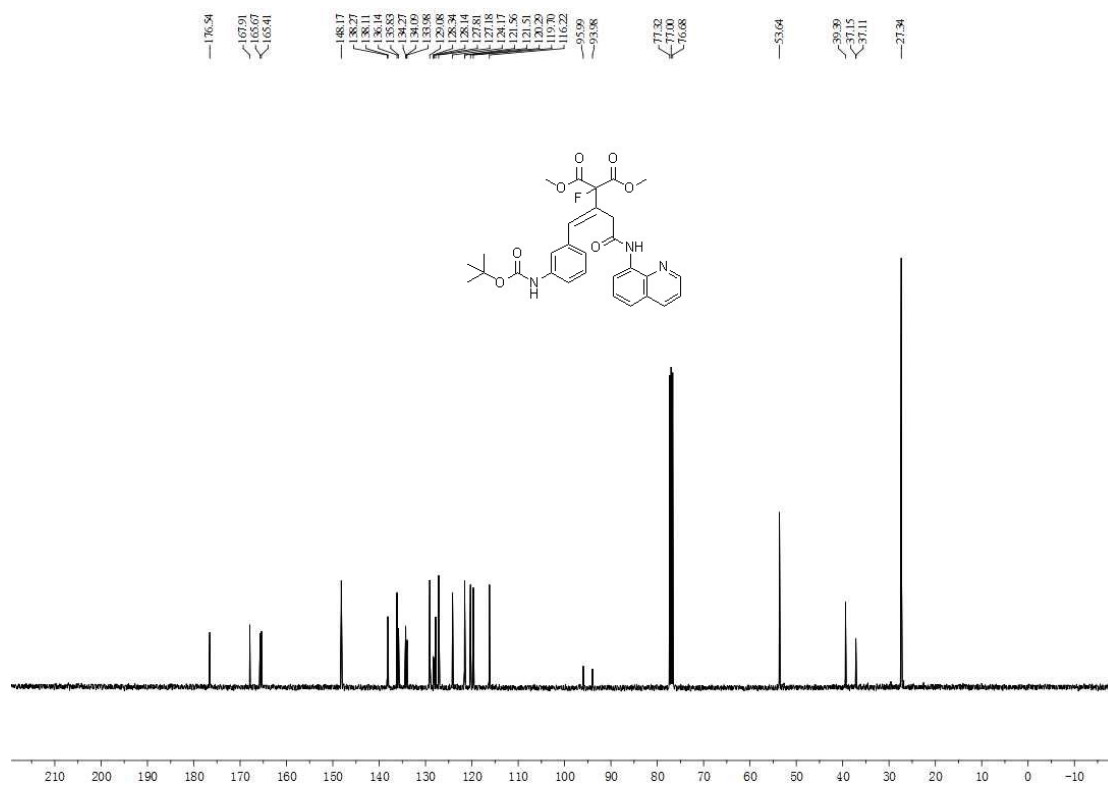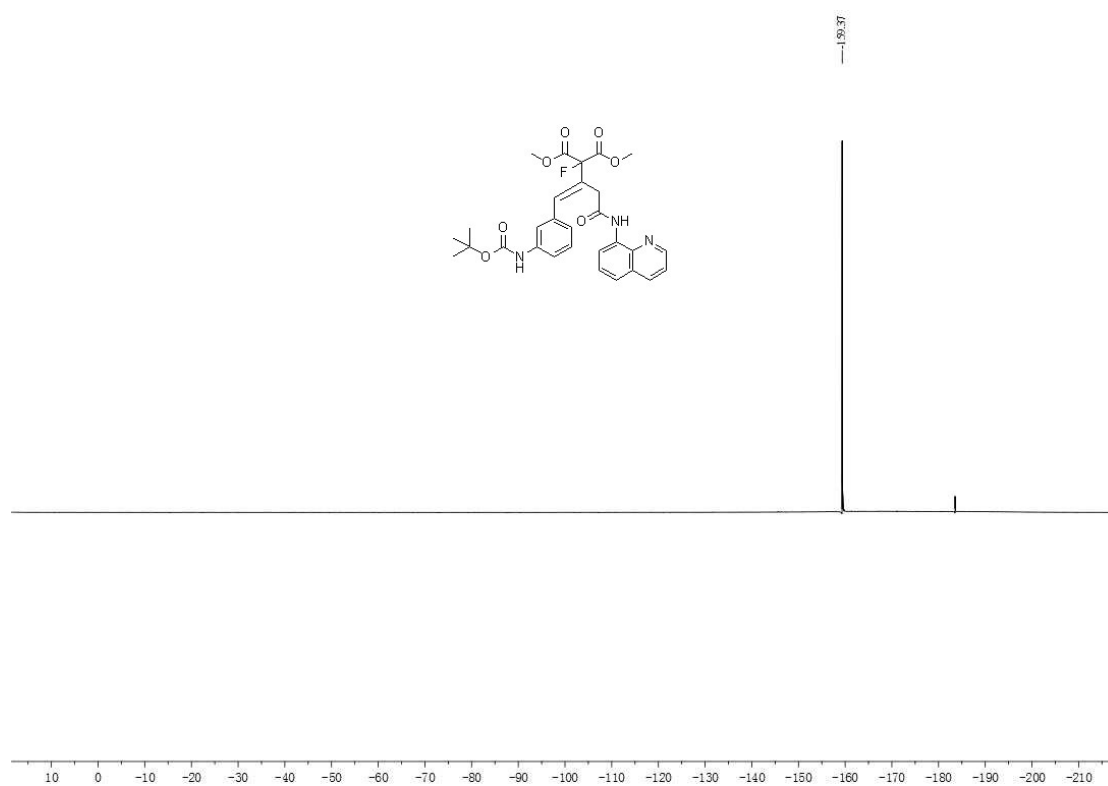



# Product 4w

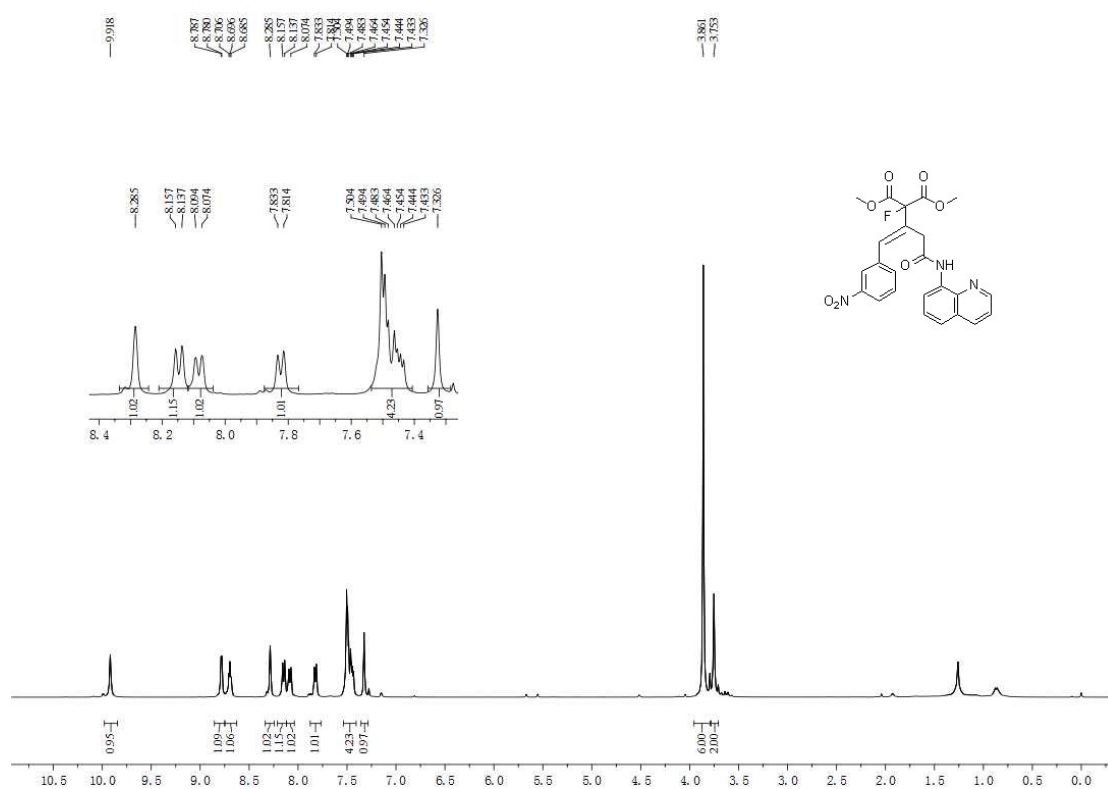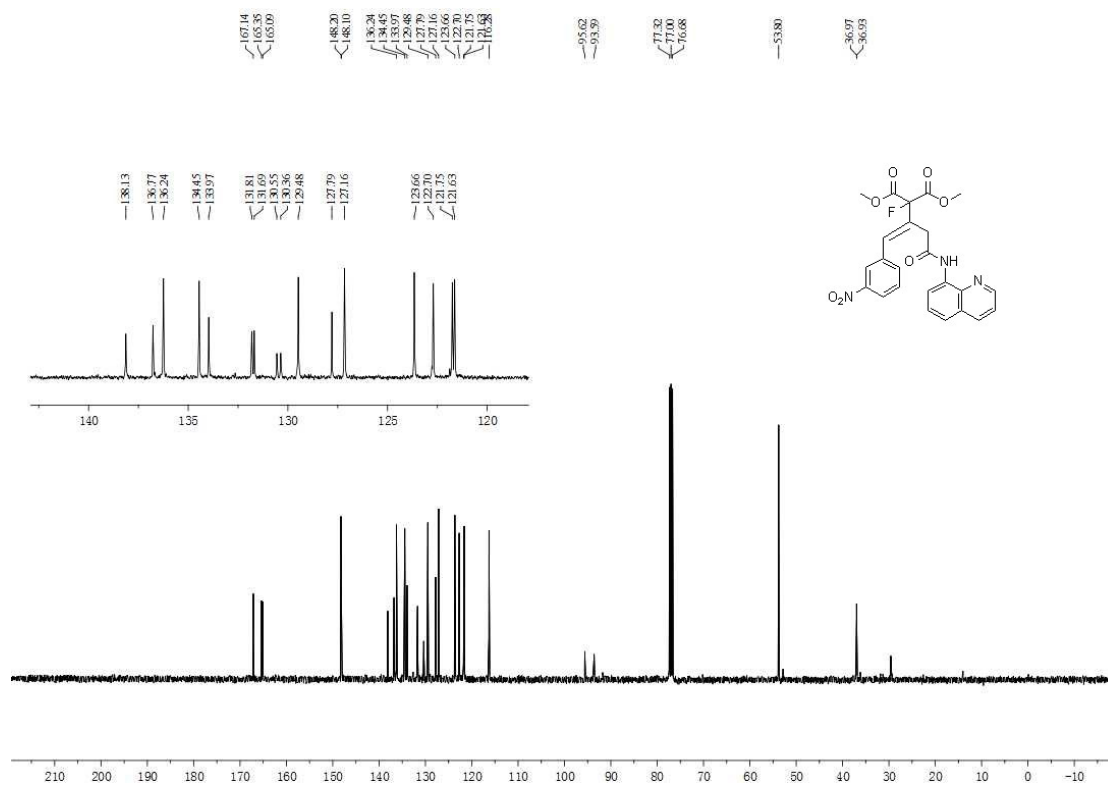



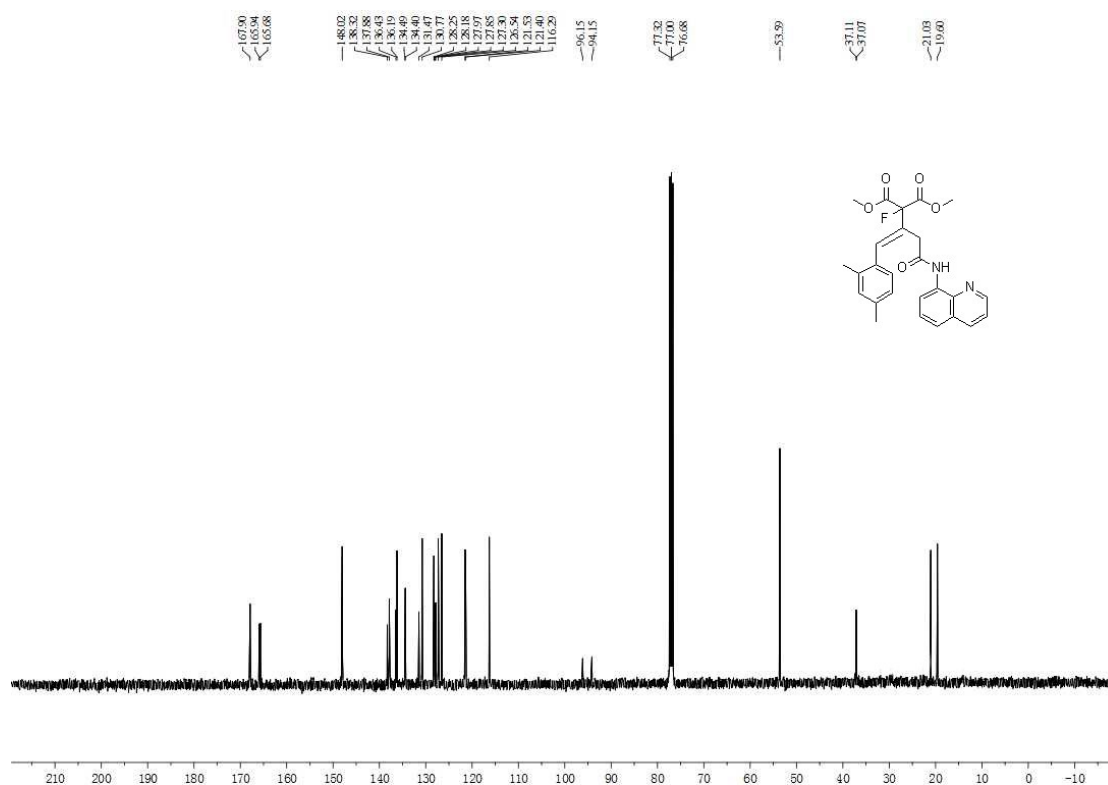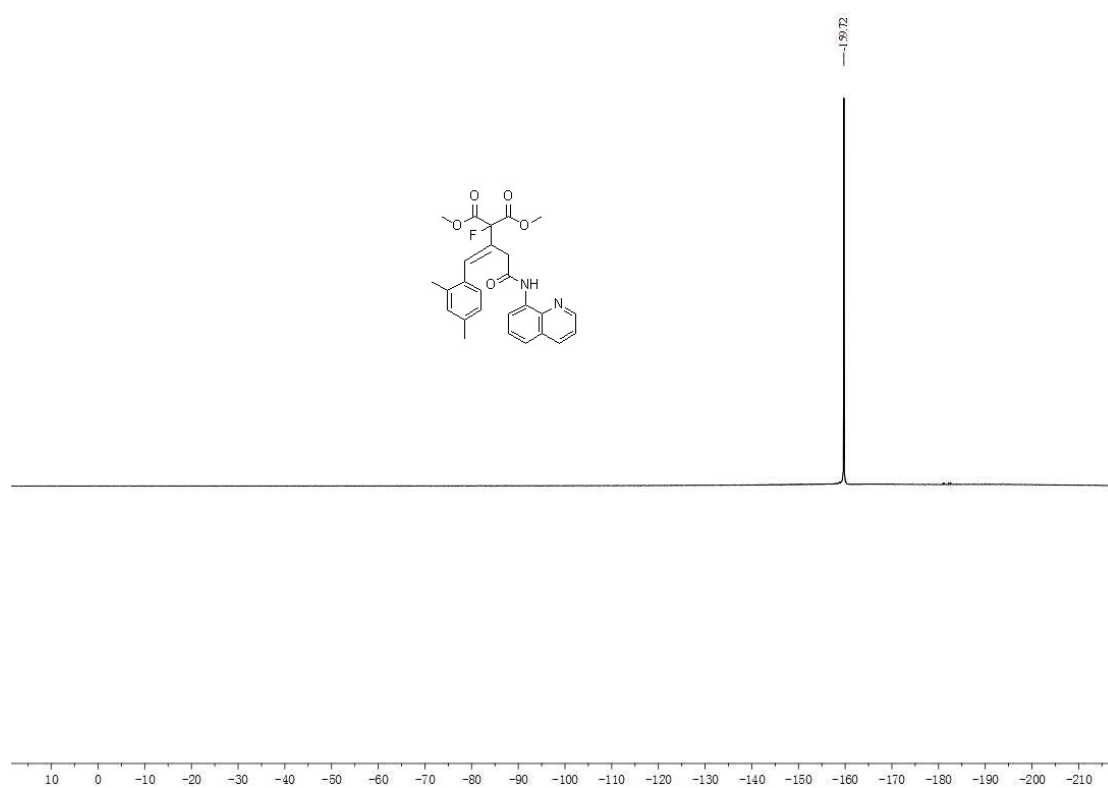

# Product 4y

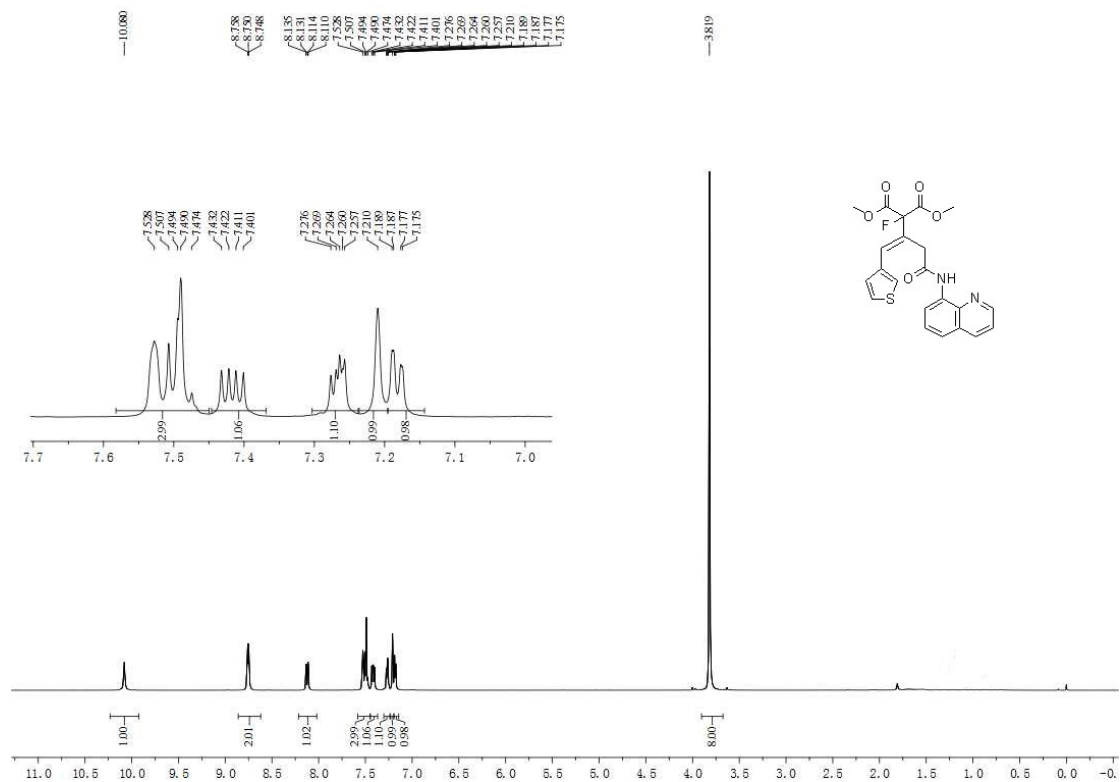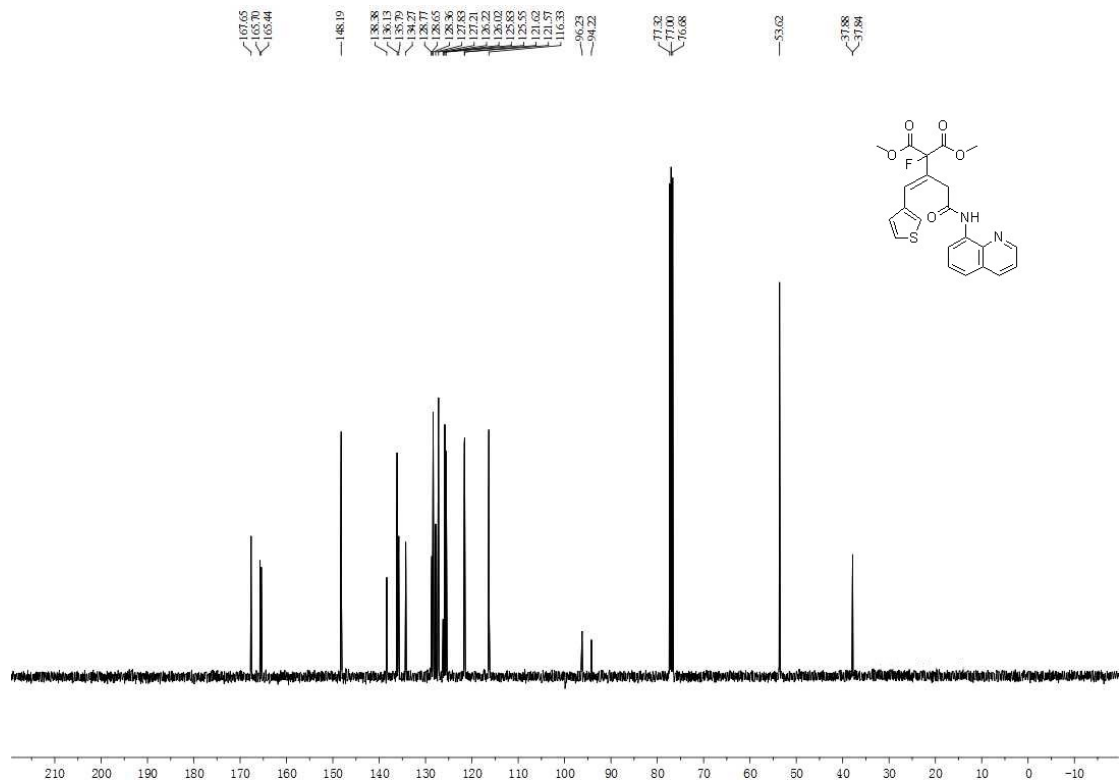

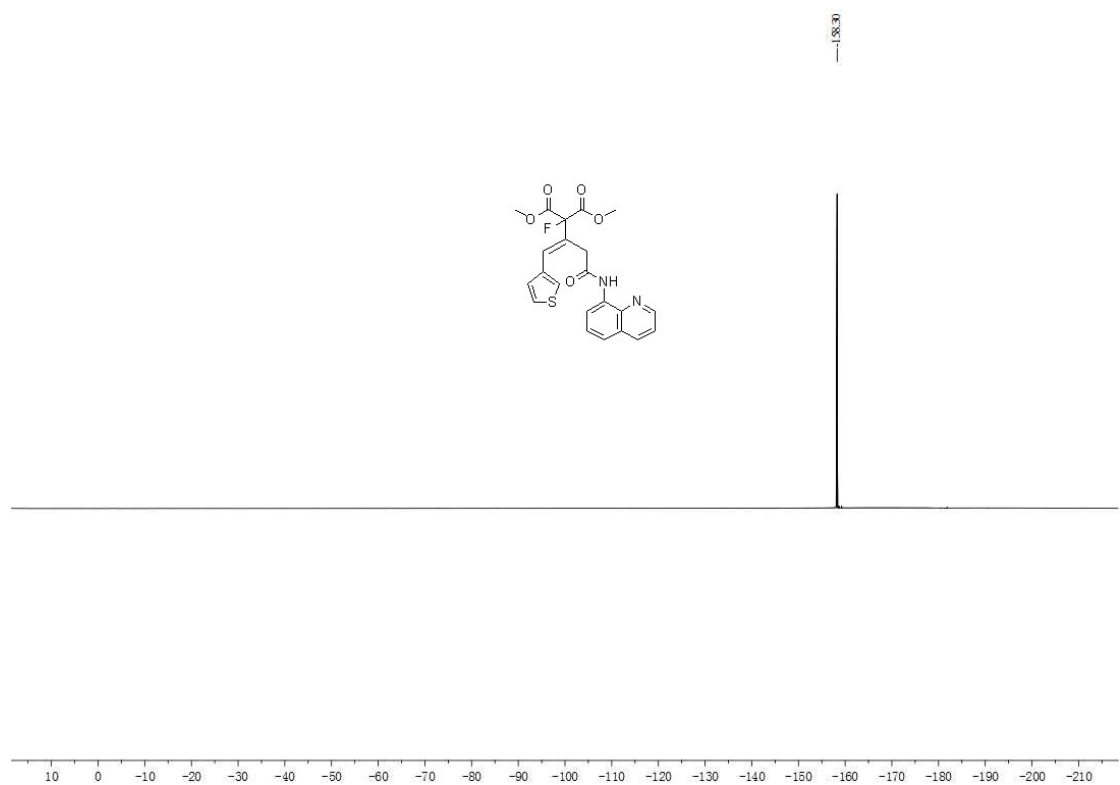

## Product 4z

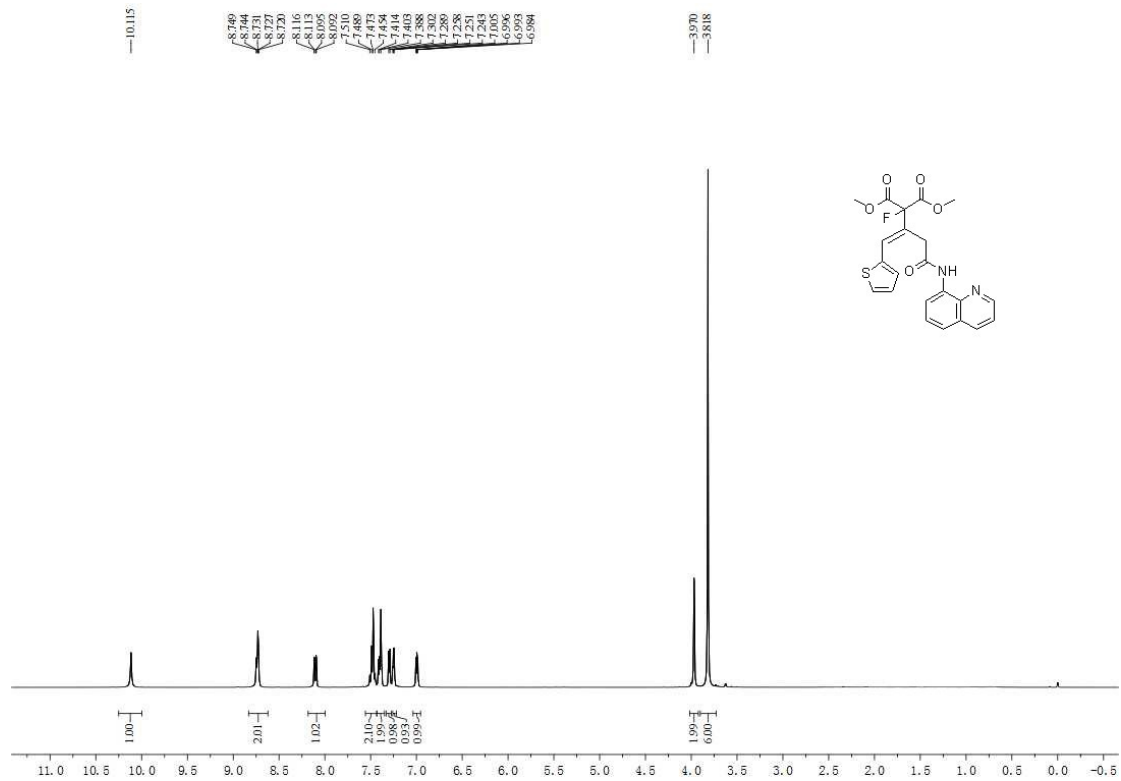

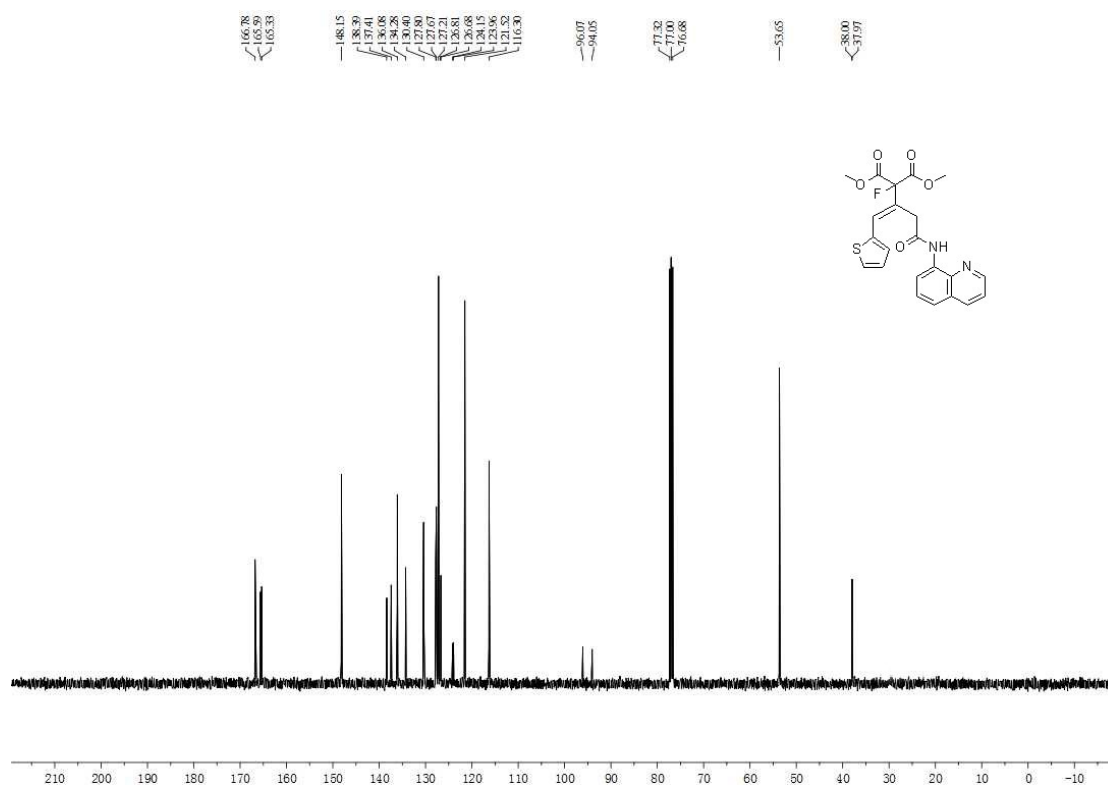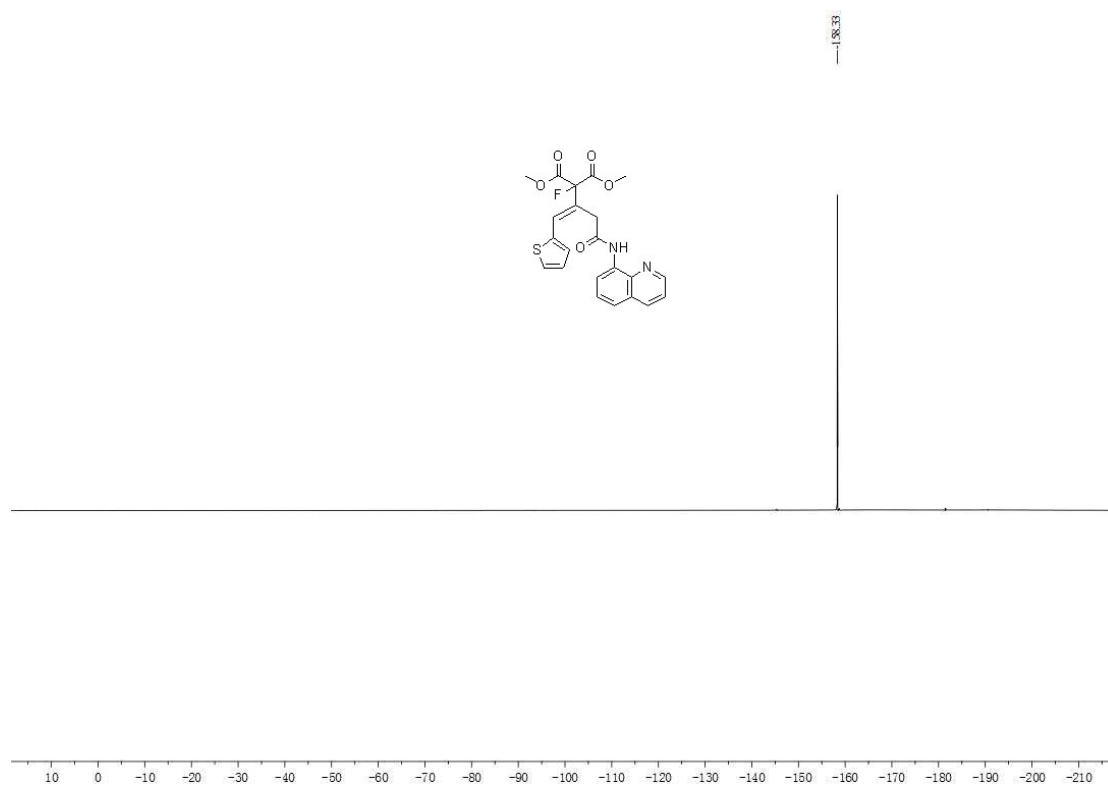

**Product 4aa**

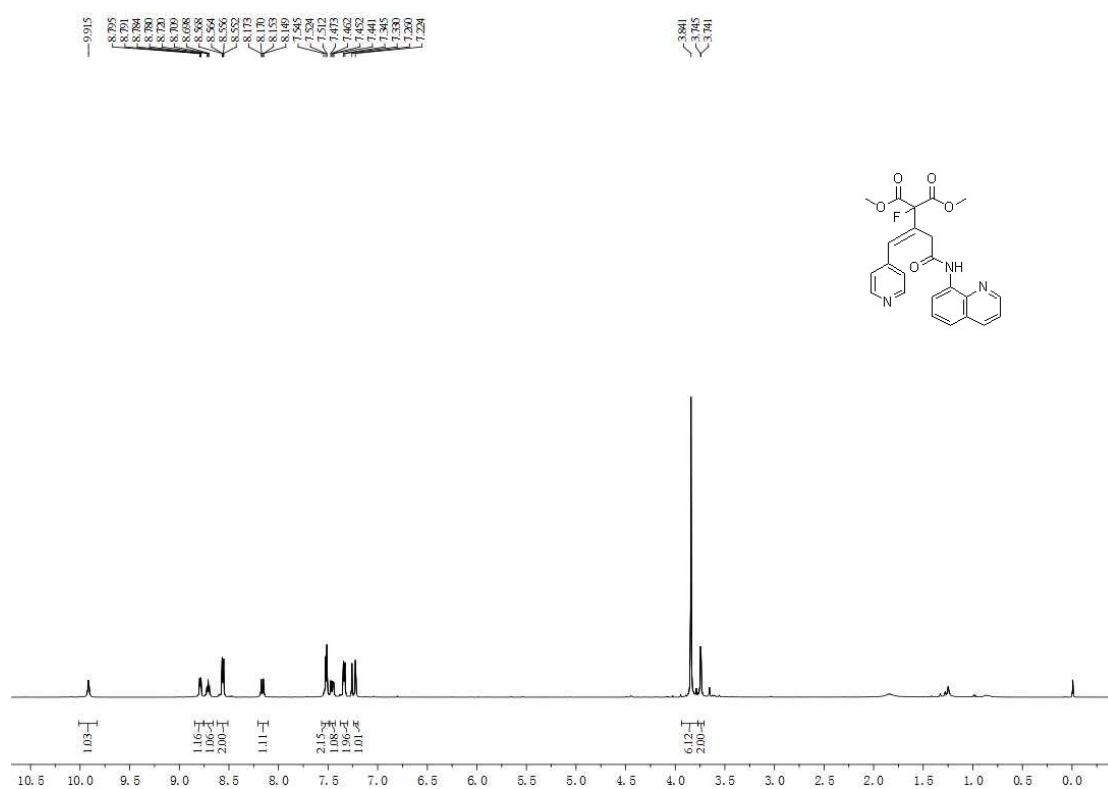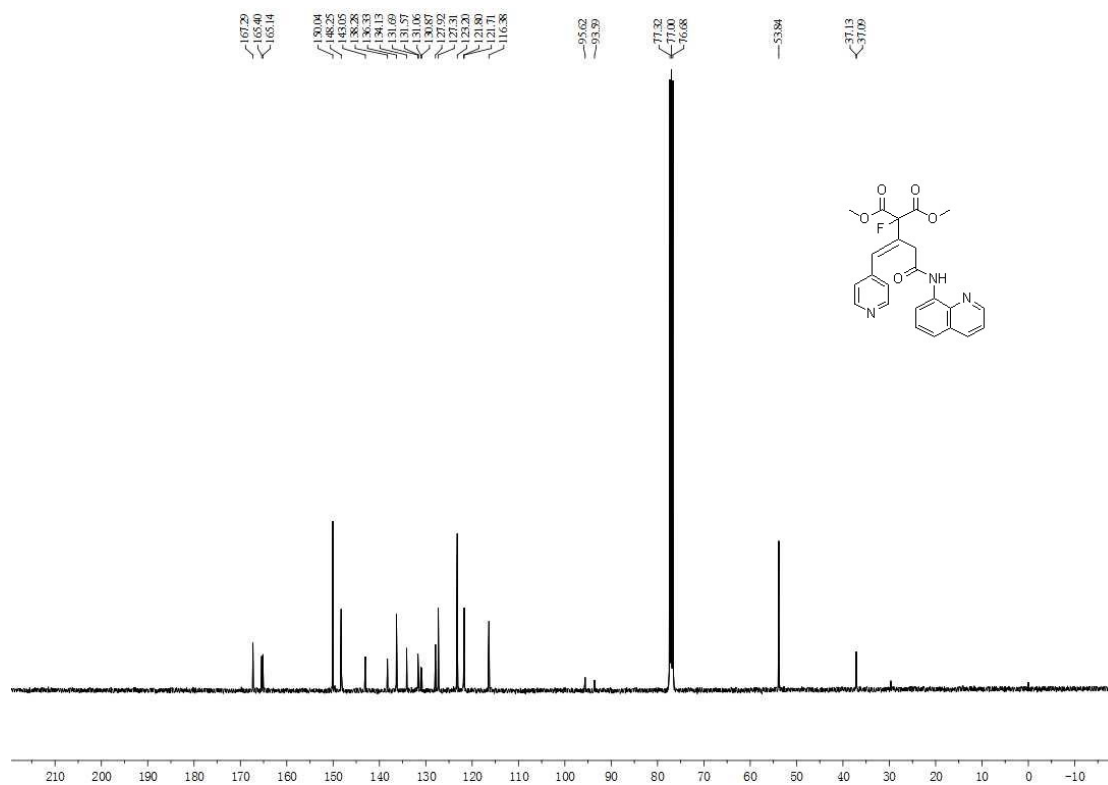

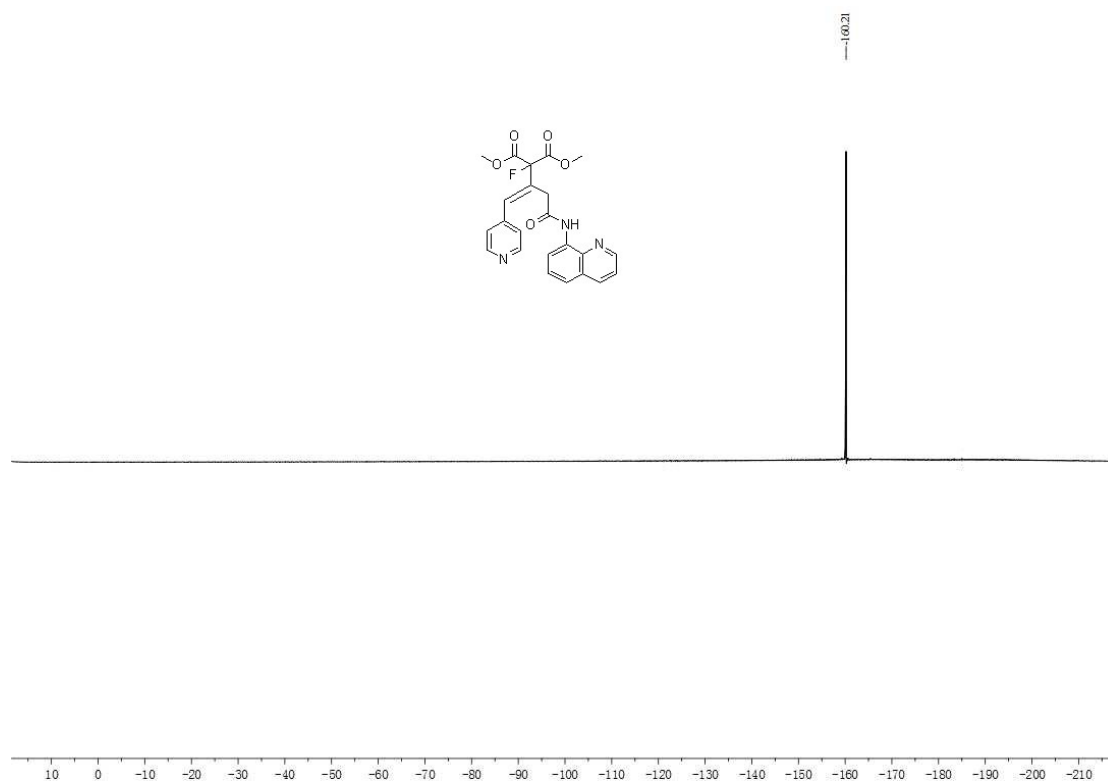

# Product 4ab

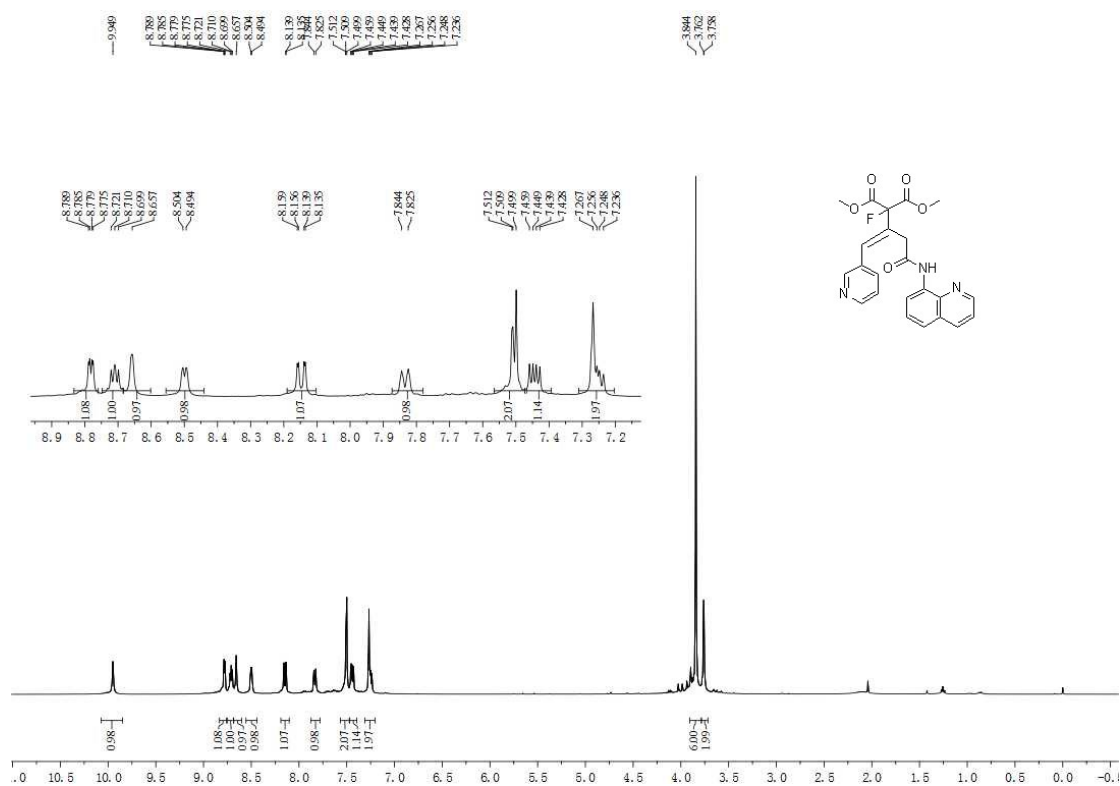



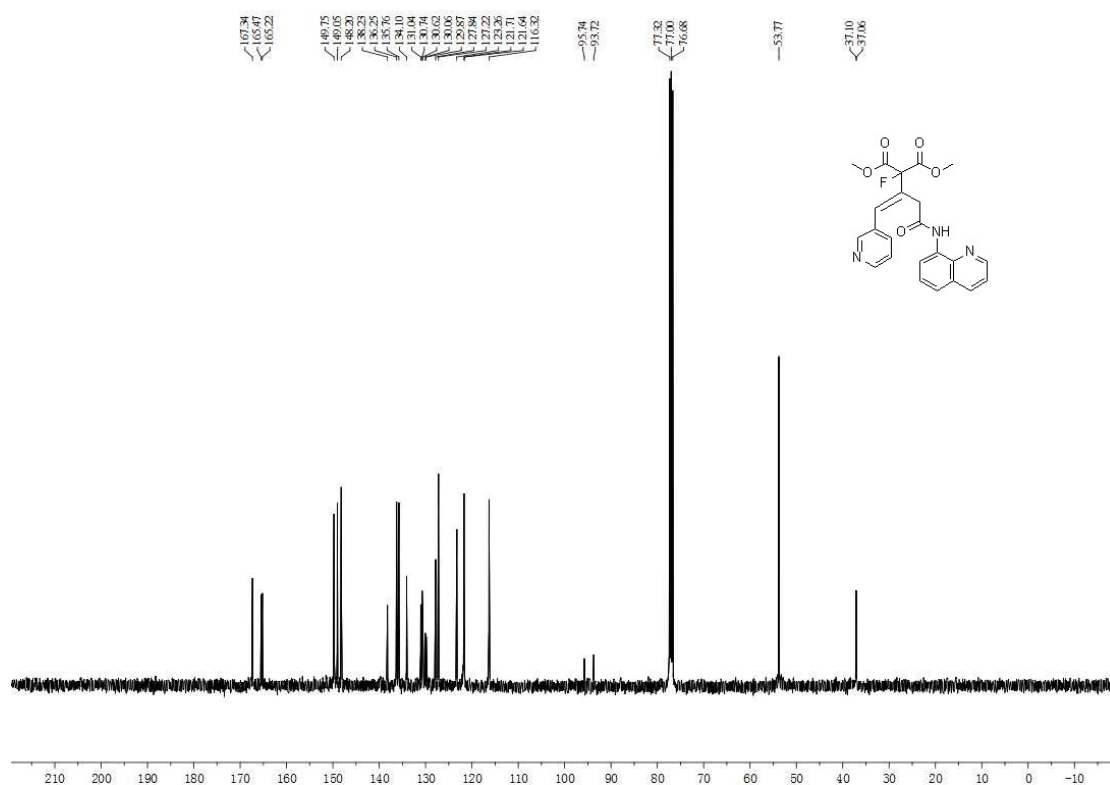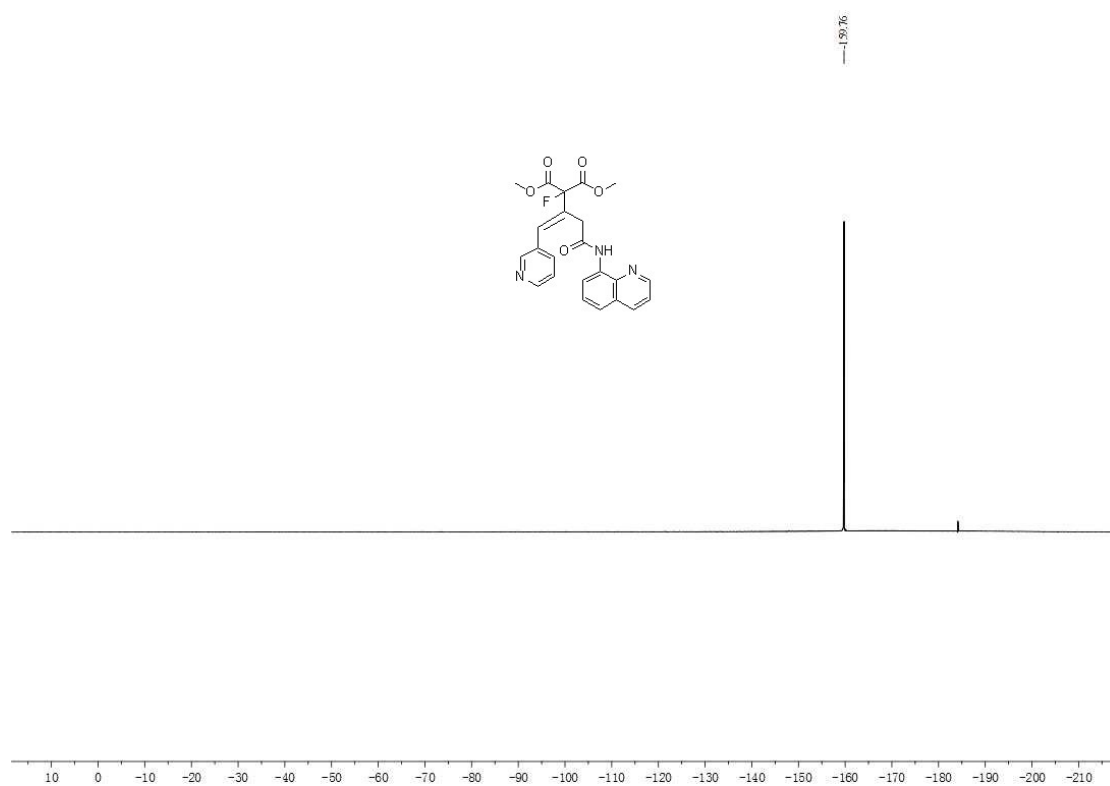

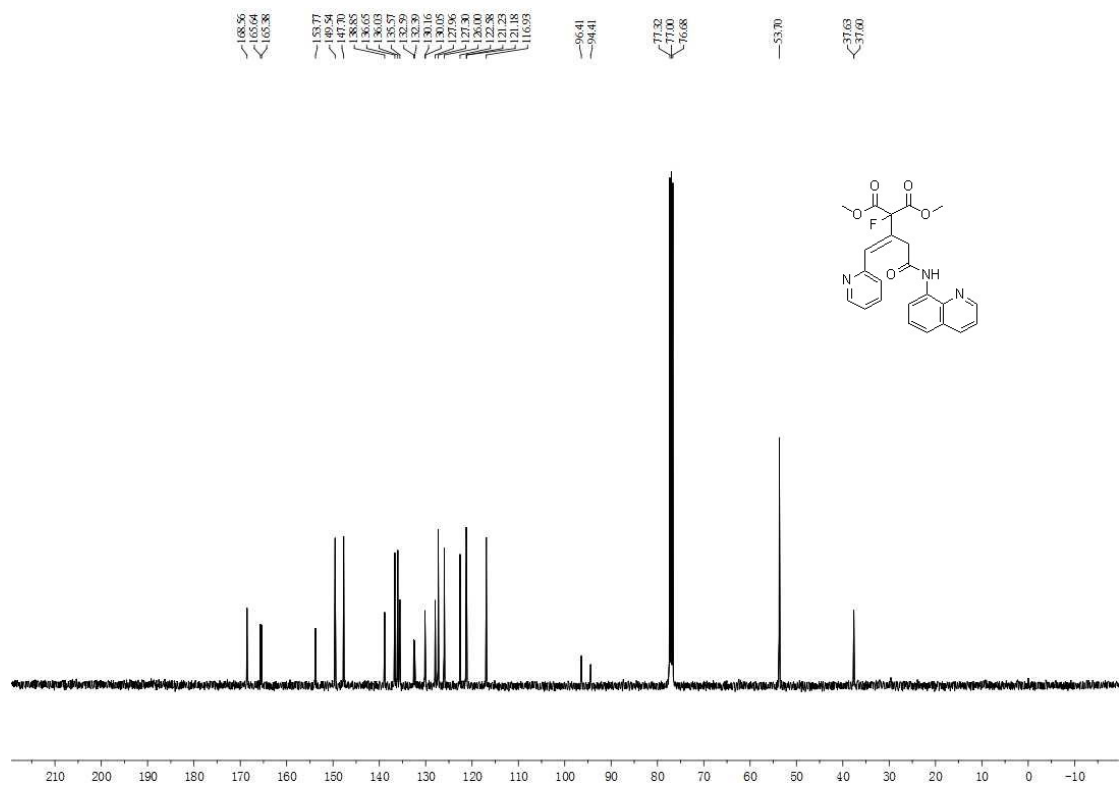

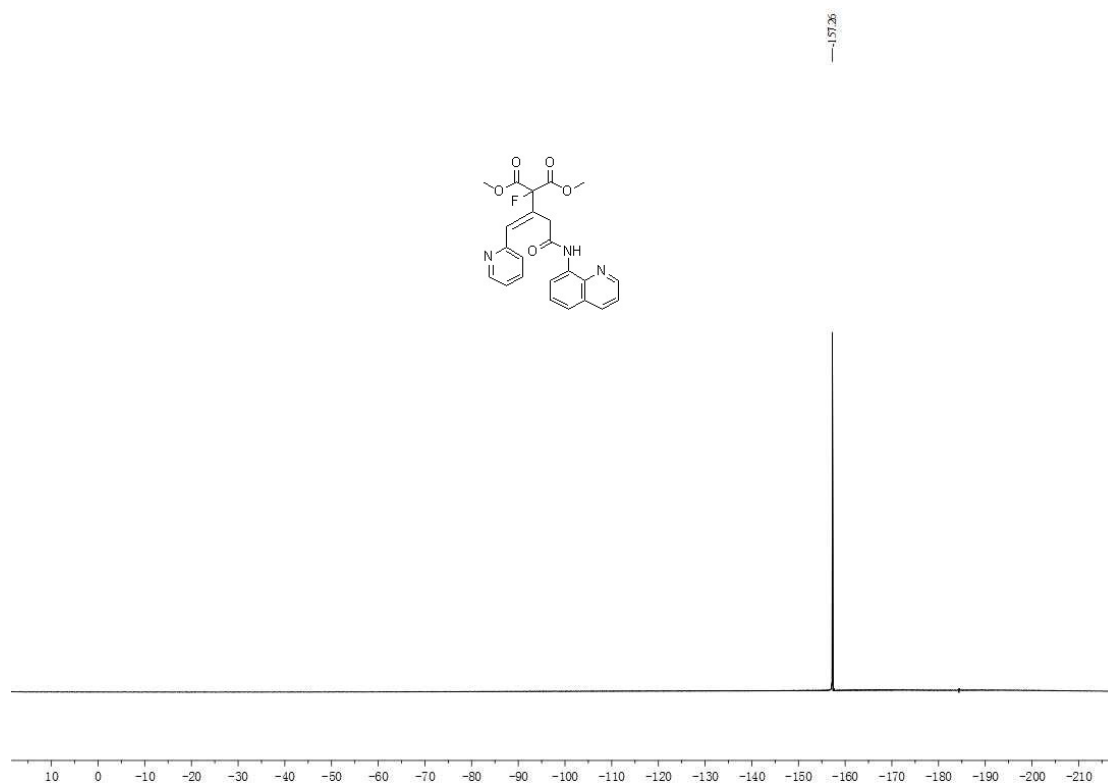

# **Product 4ad**

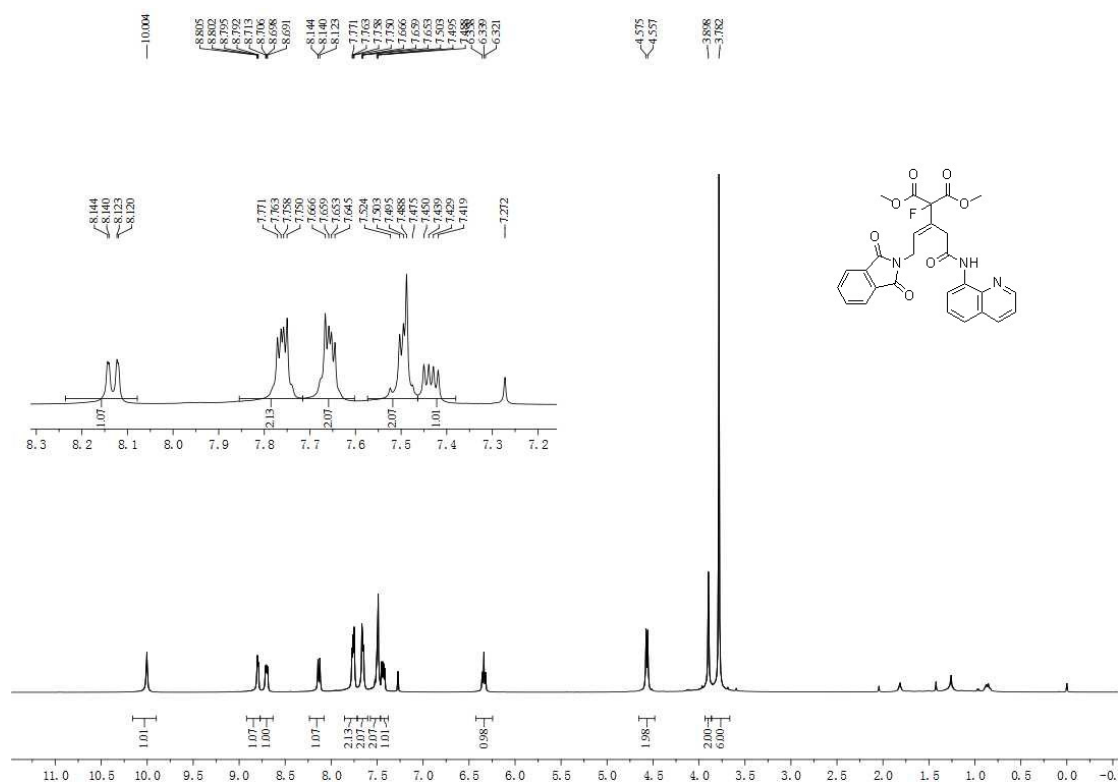

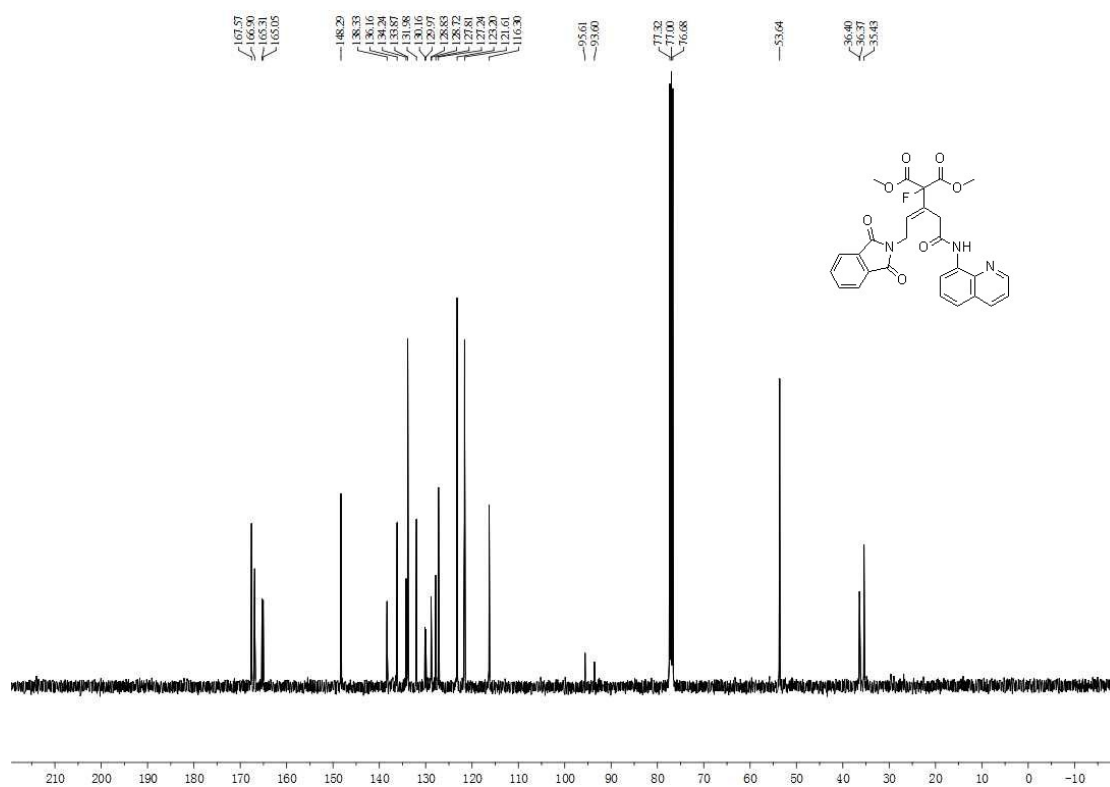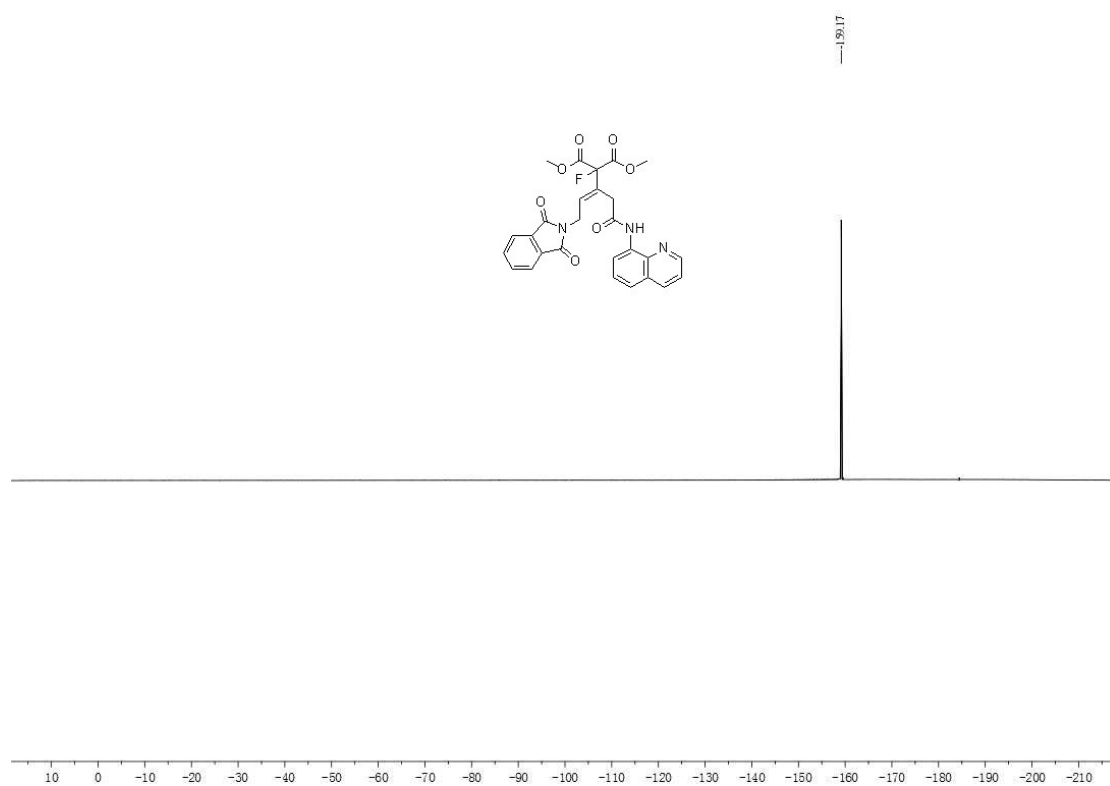

# Product 4ae

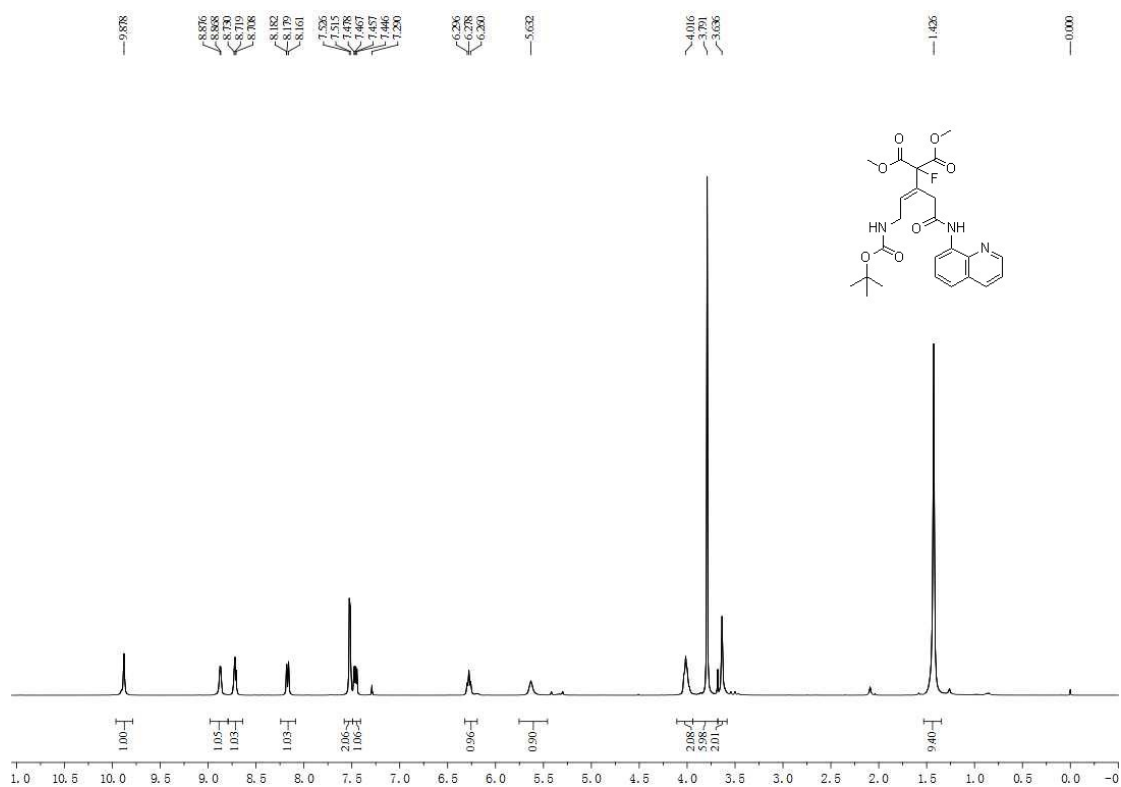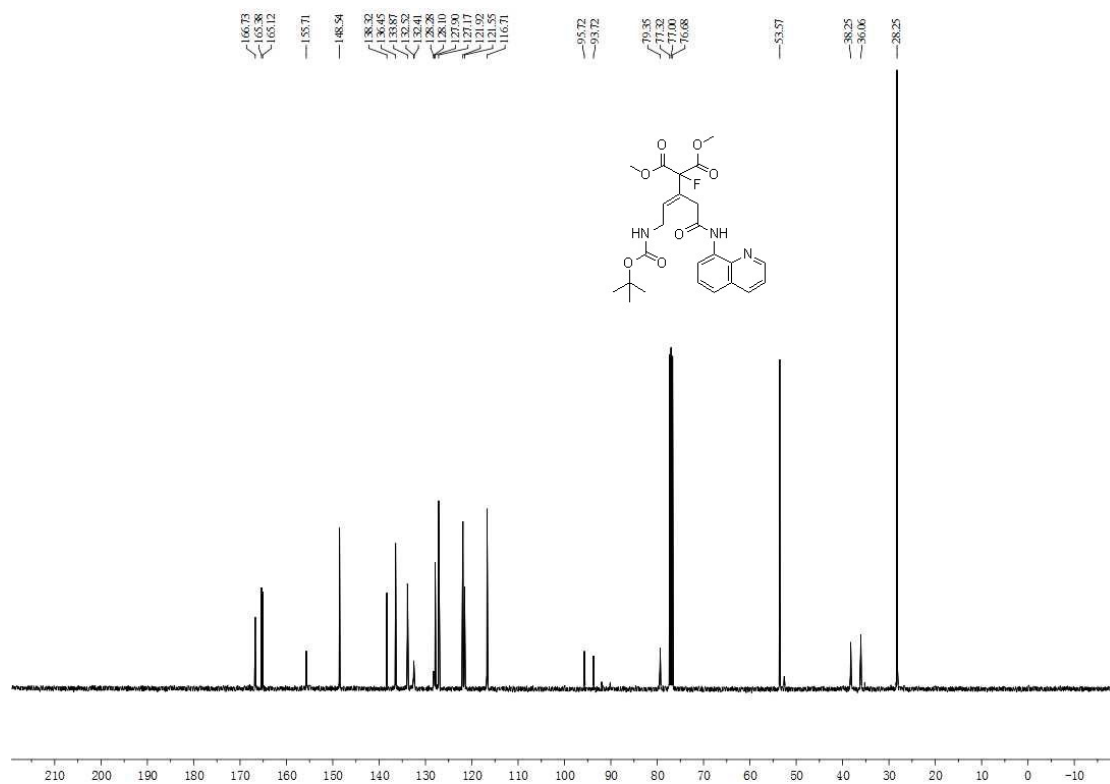

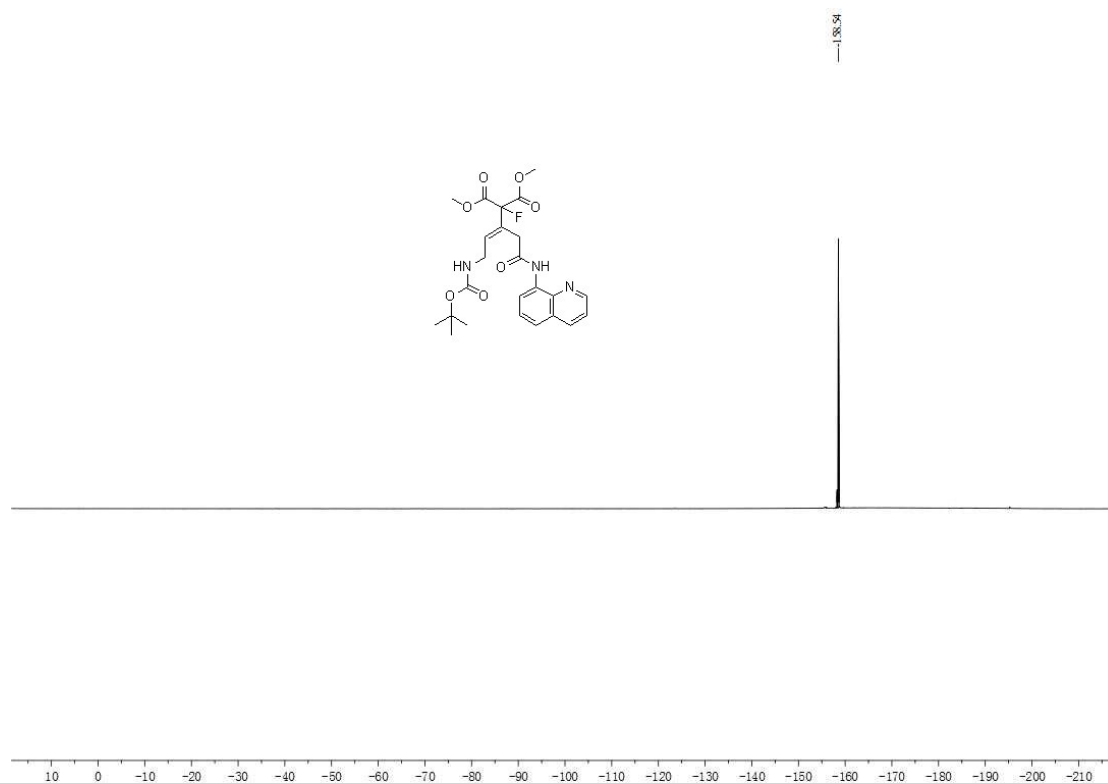

# Product 4af

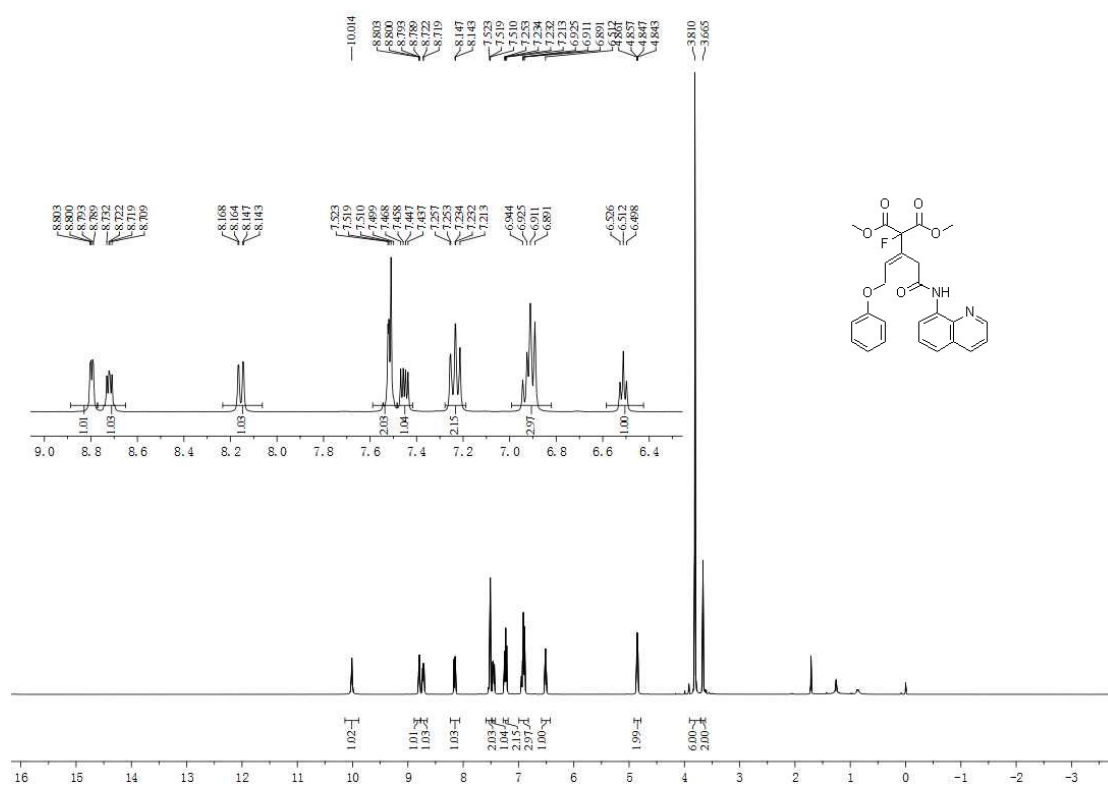

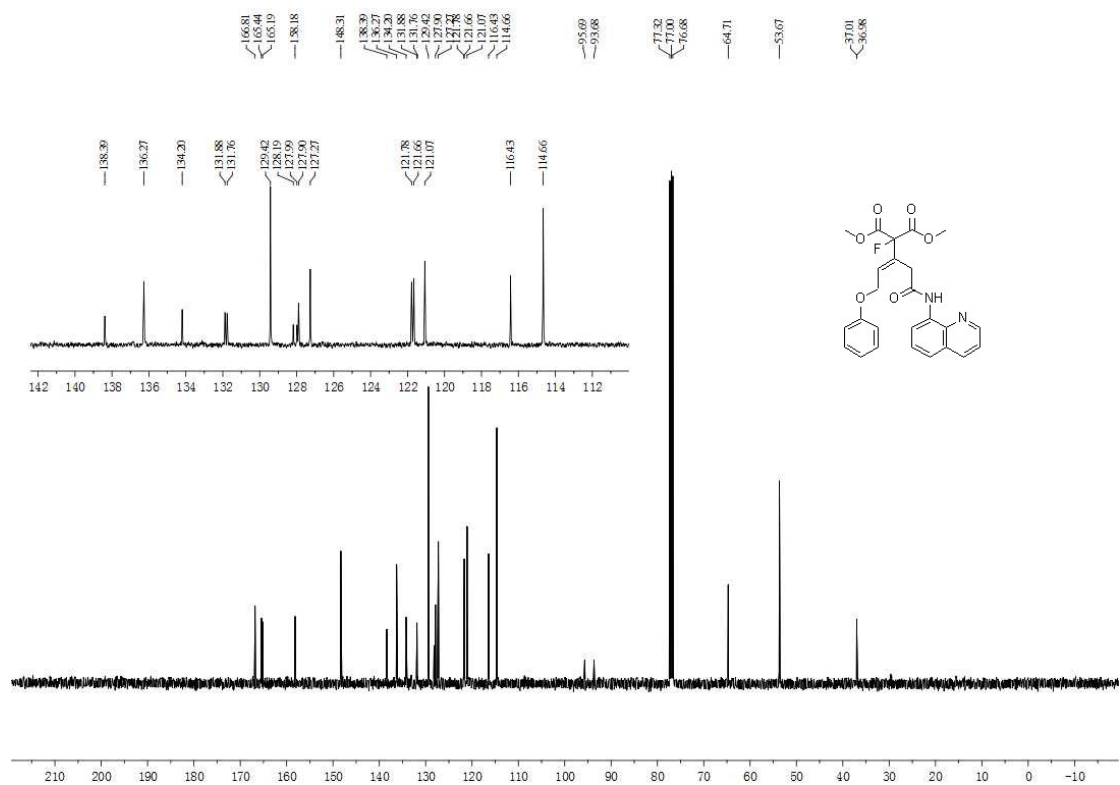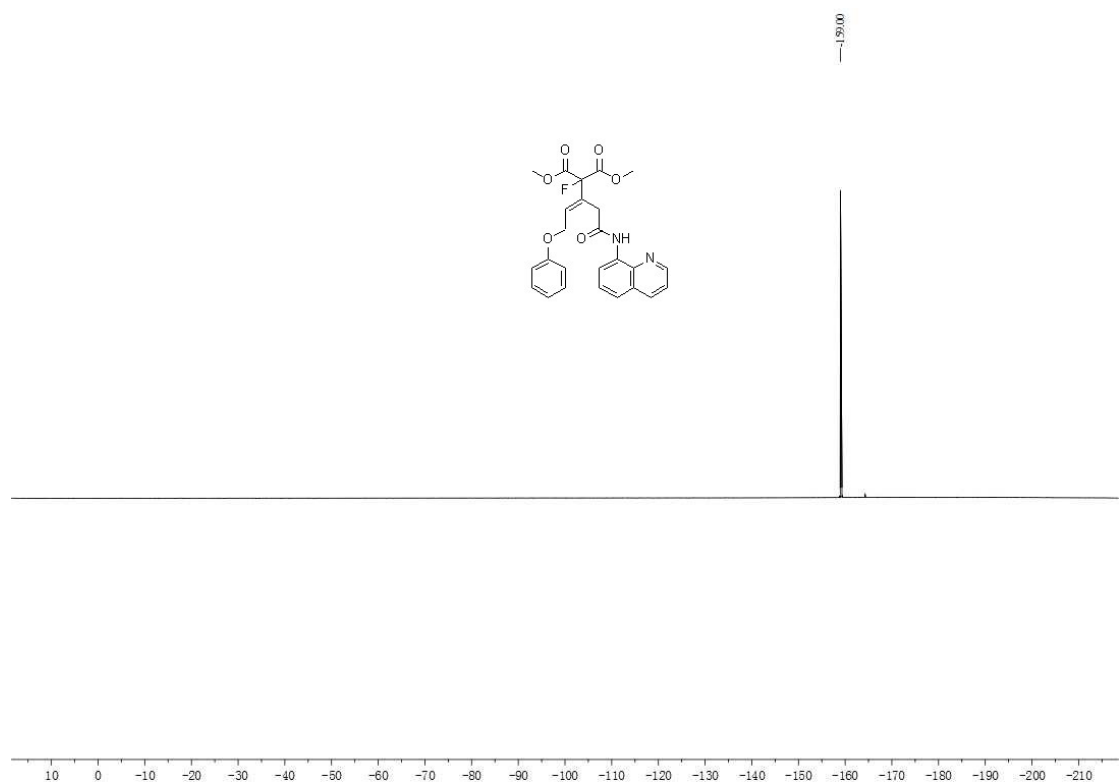

# Product 4ag

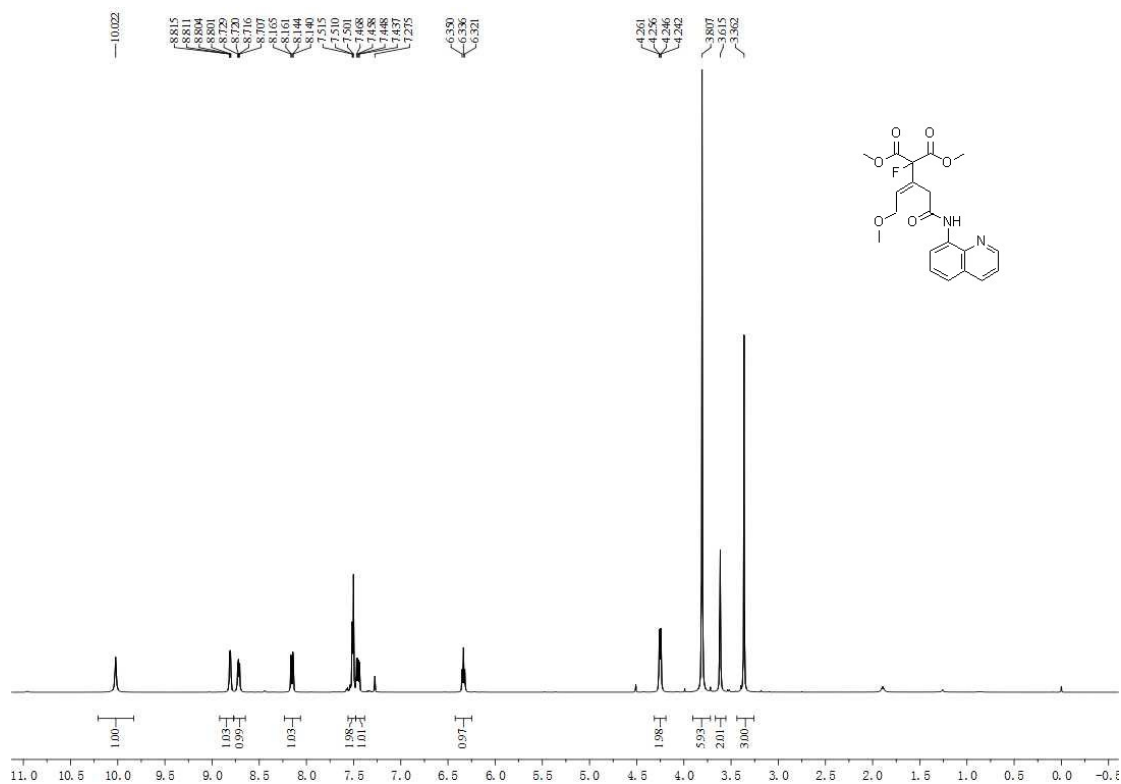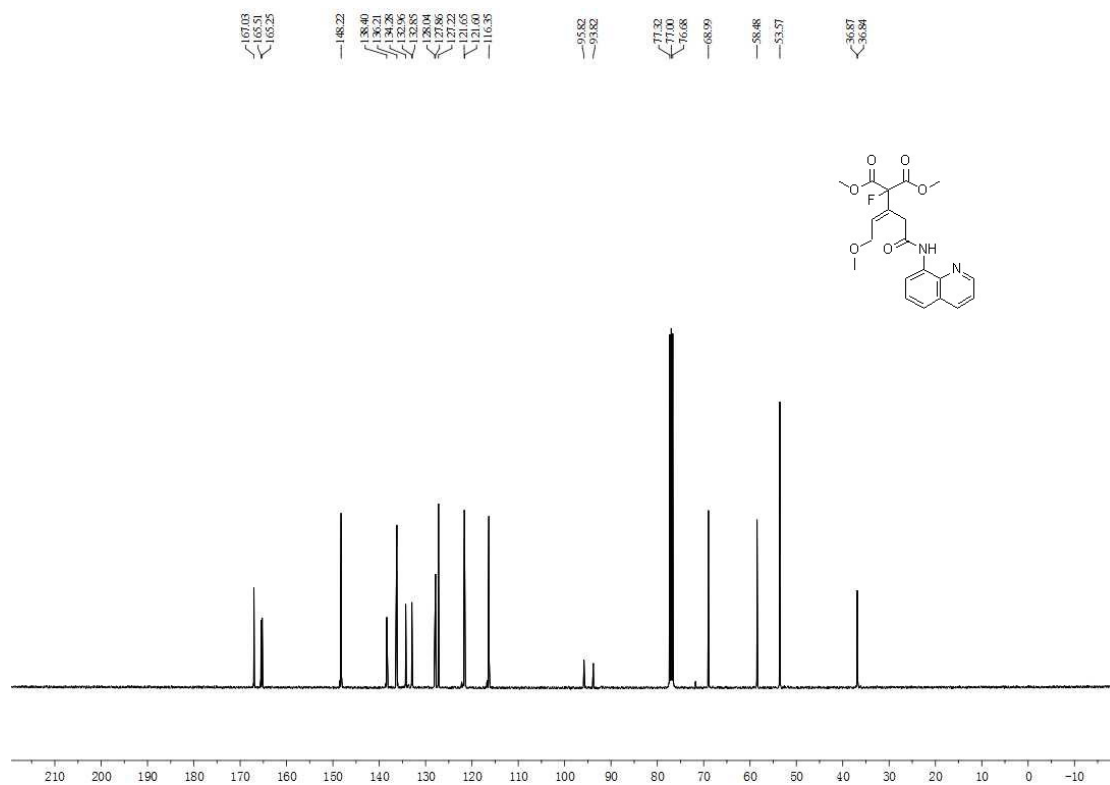



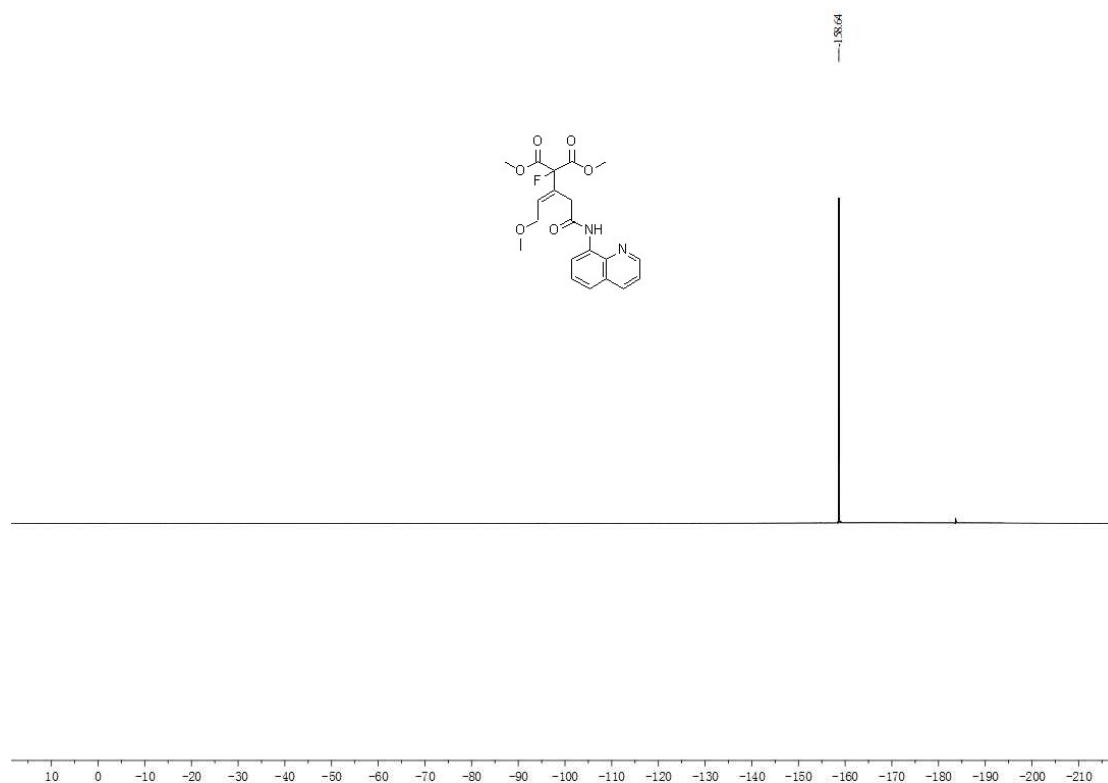

# Product 4ah

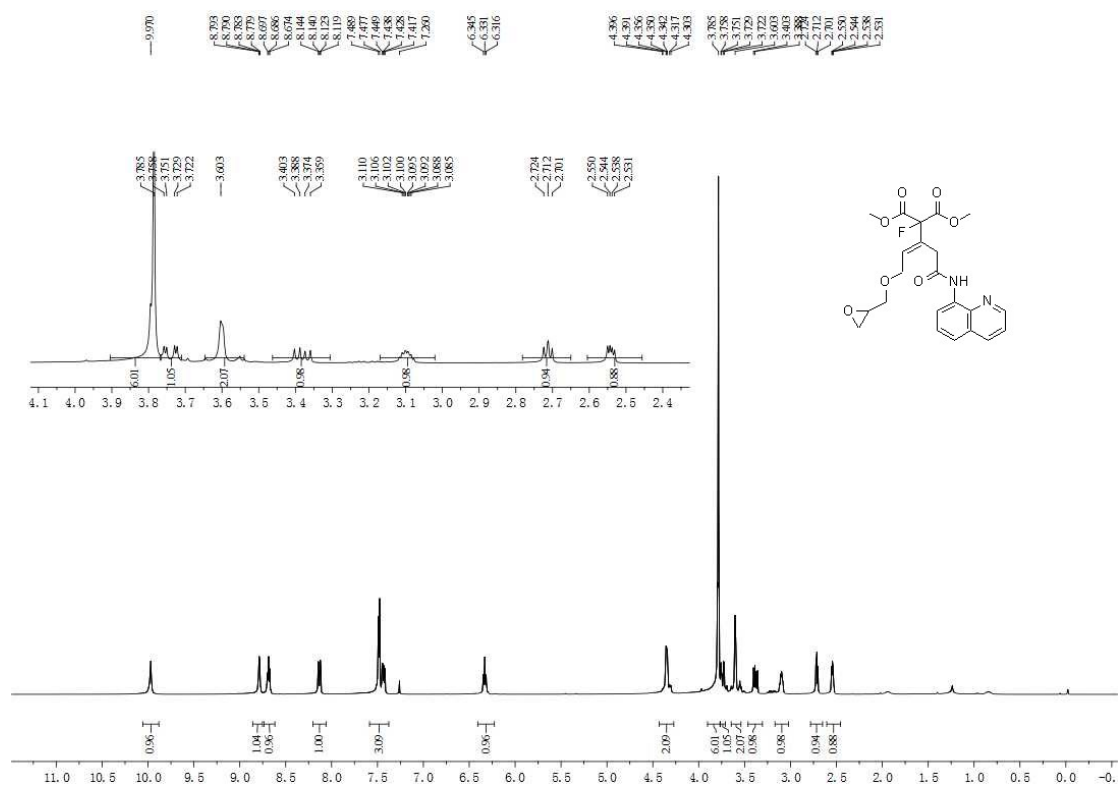

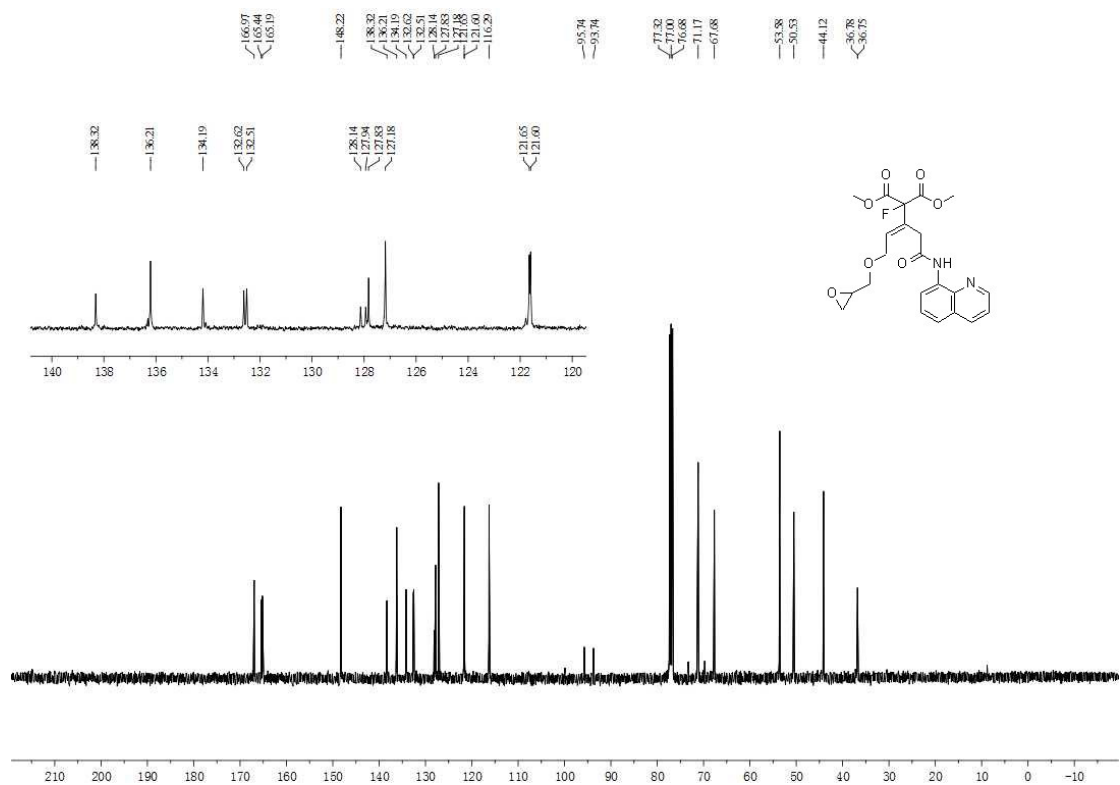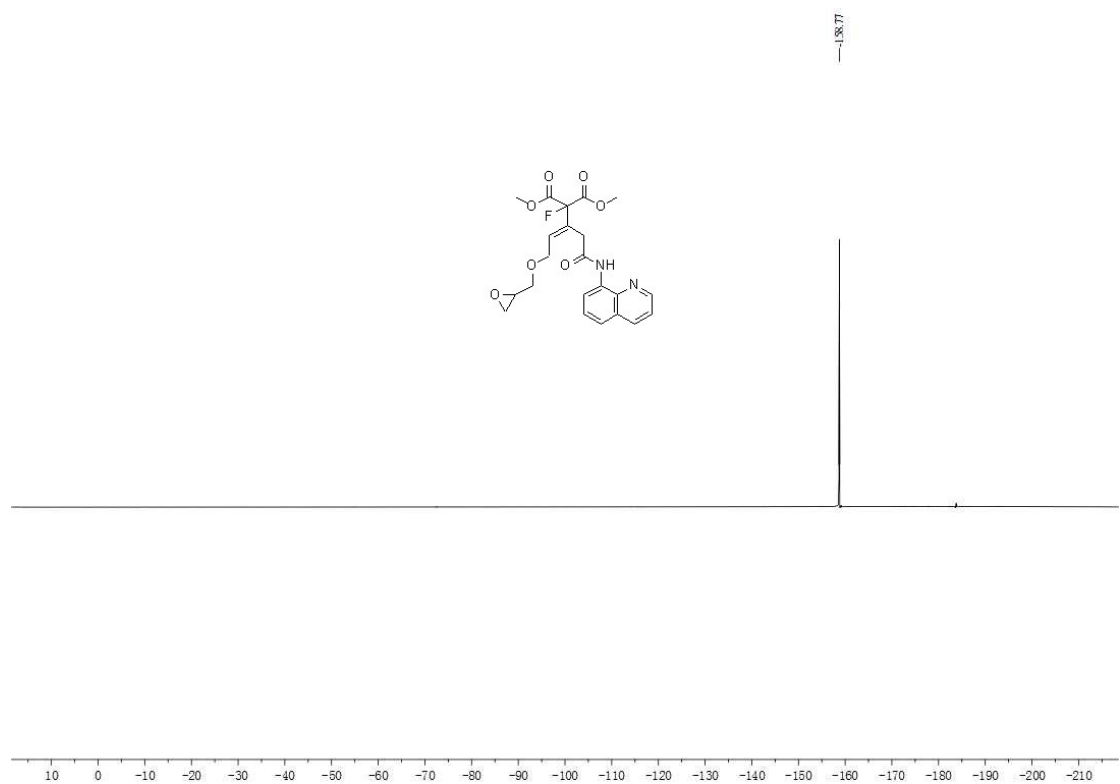

# Product 4ai

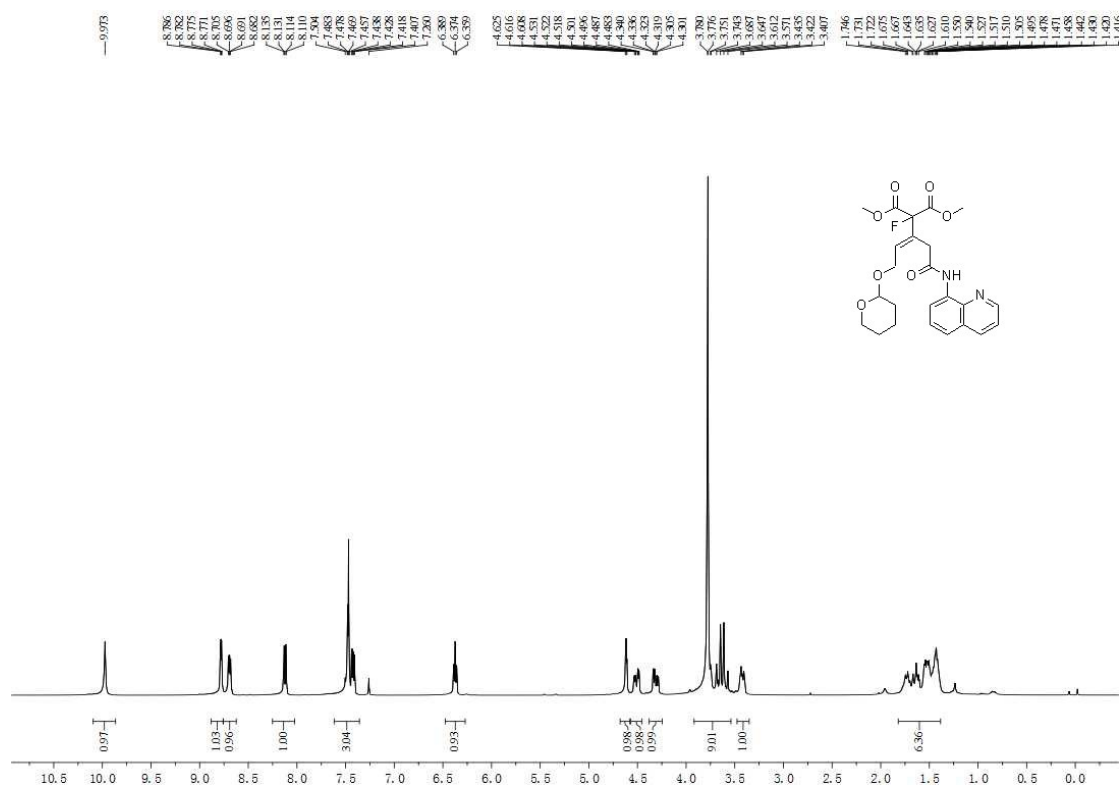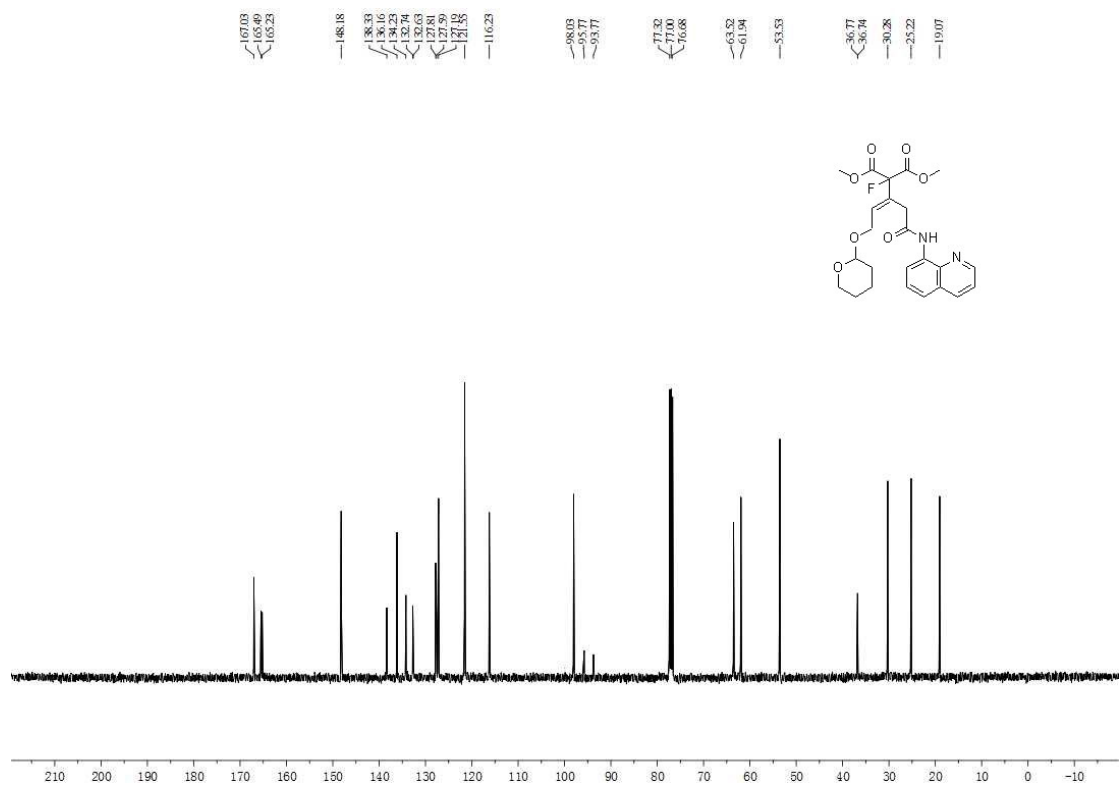

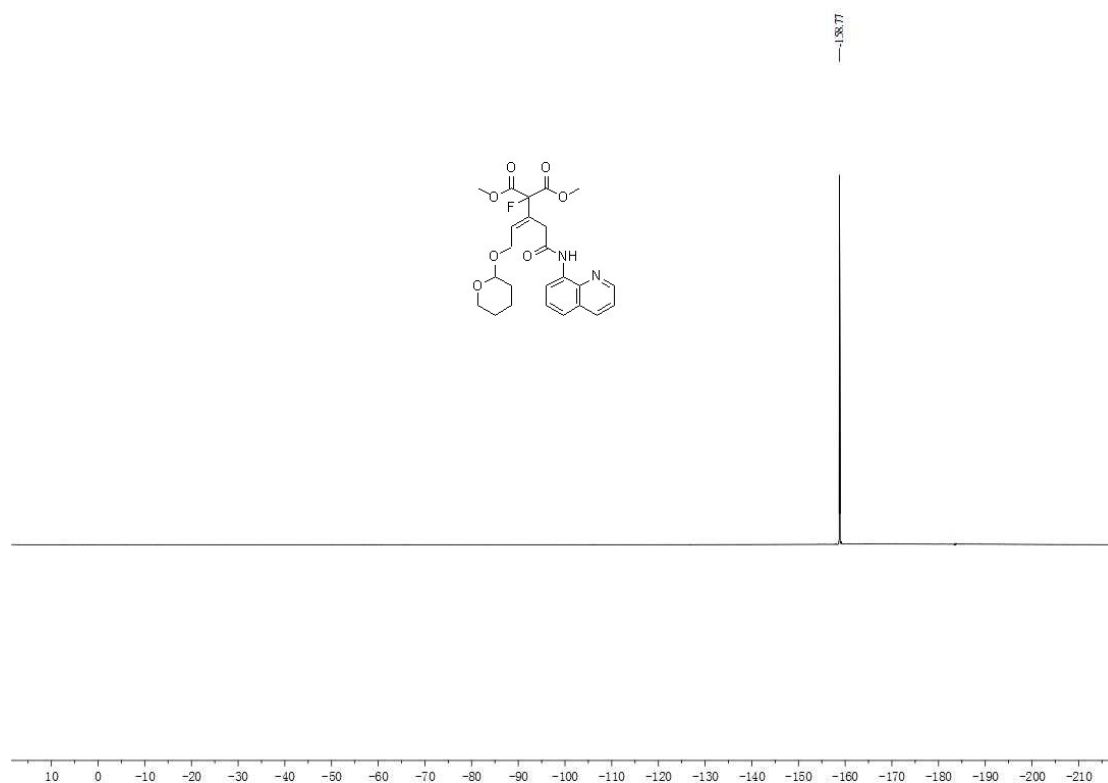

## Product 4aj

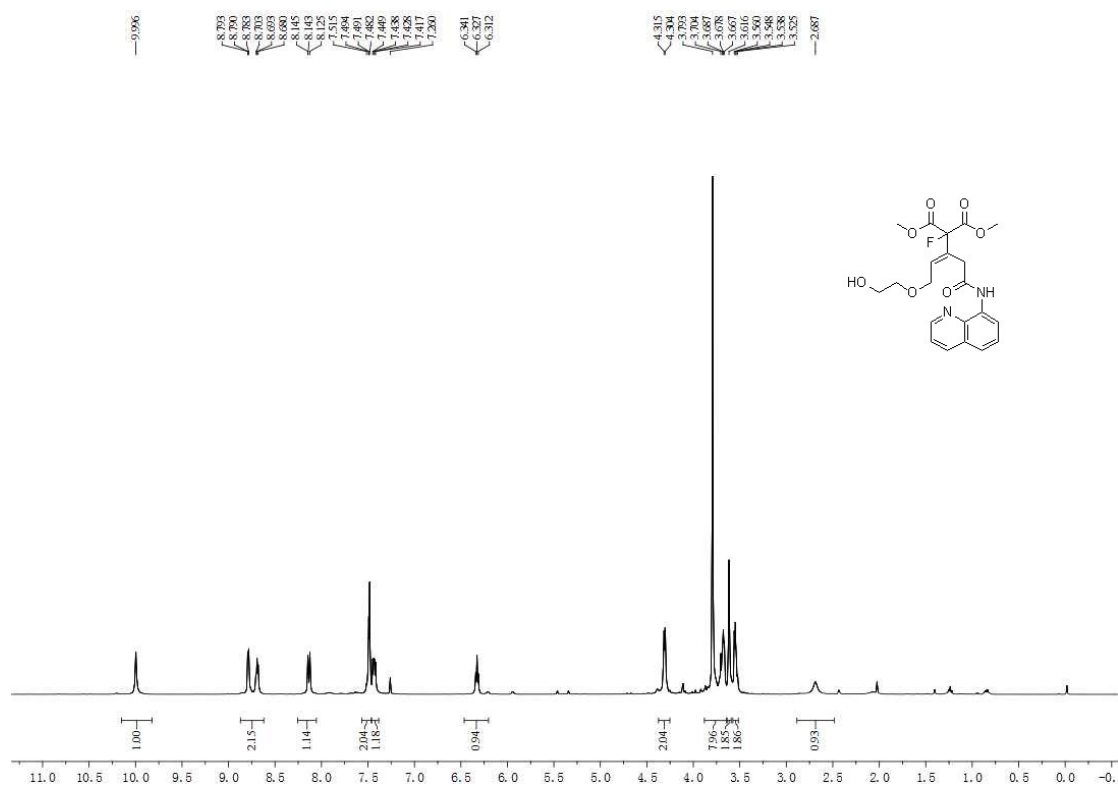

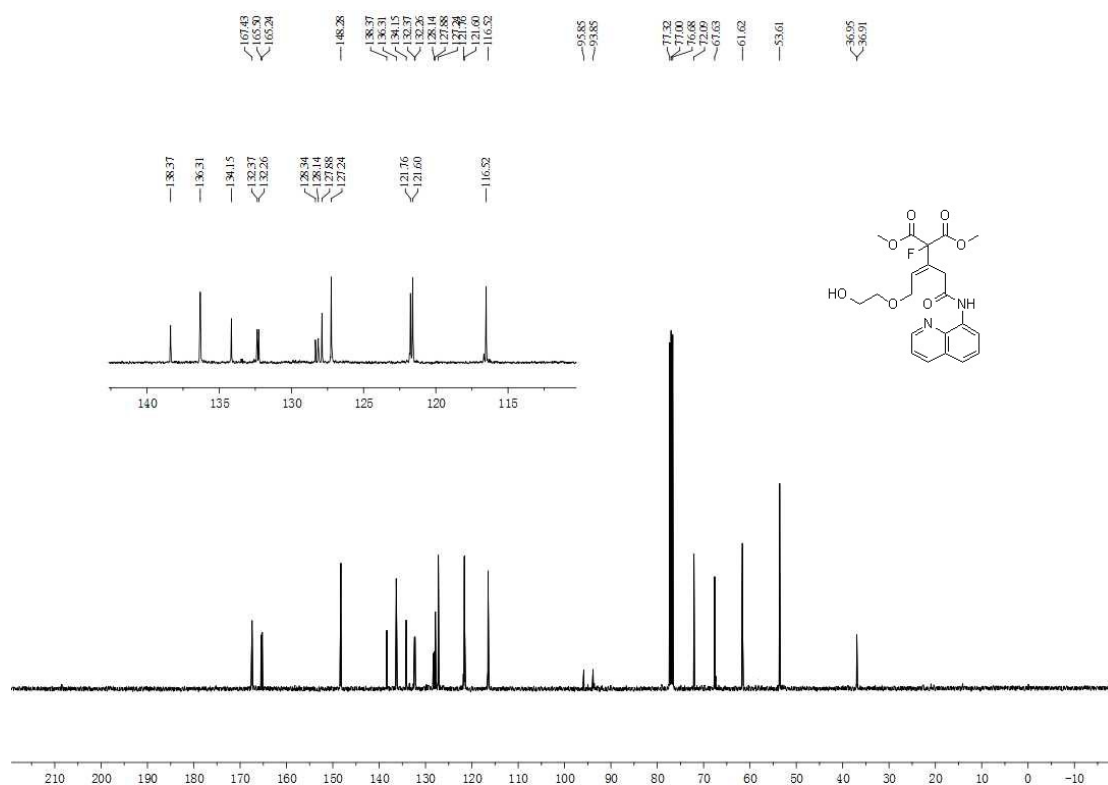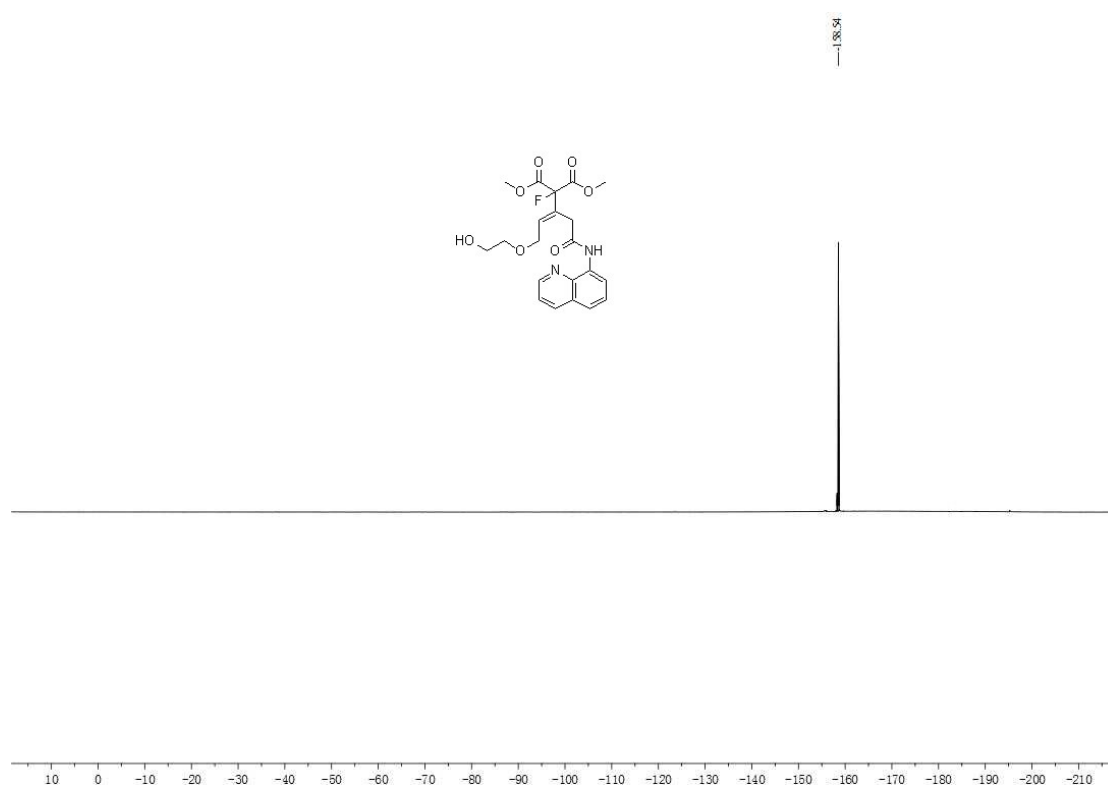

# Product 4ak

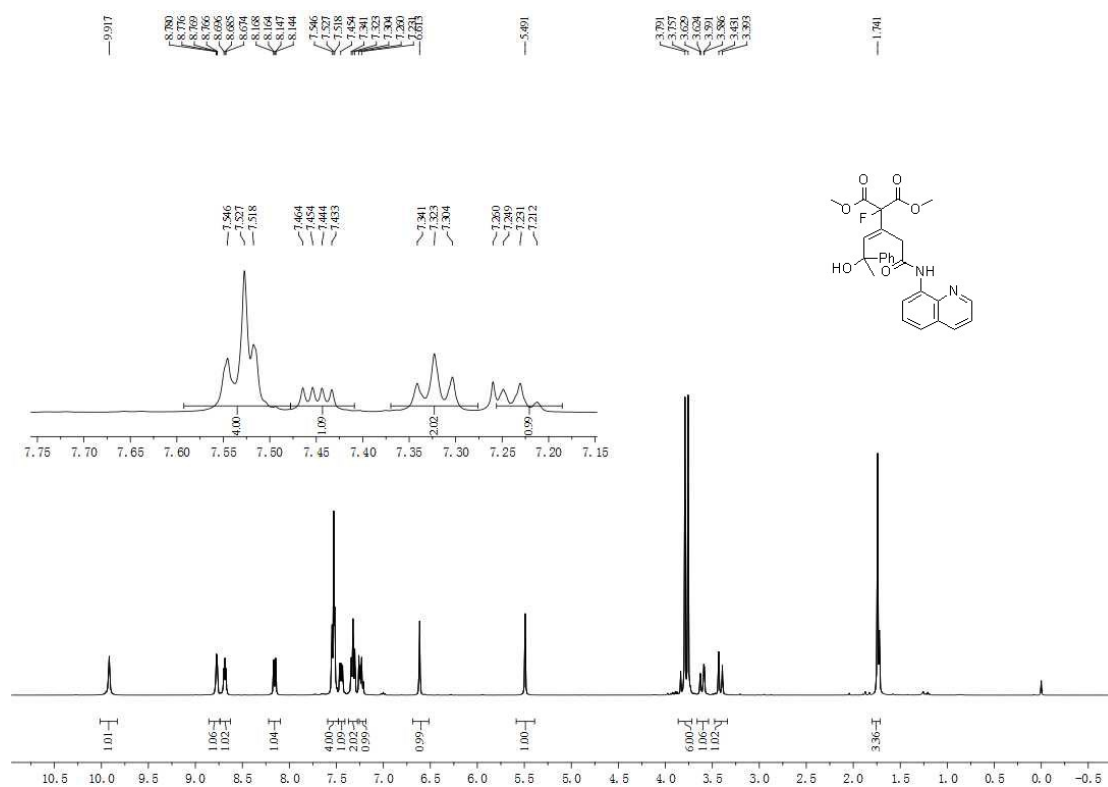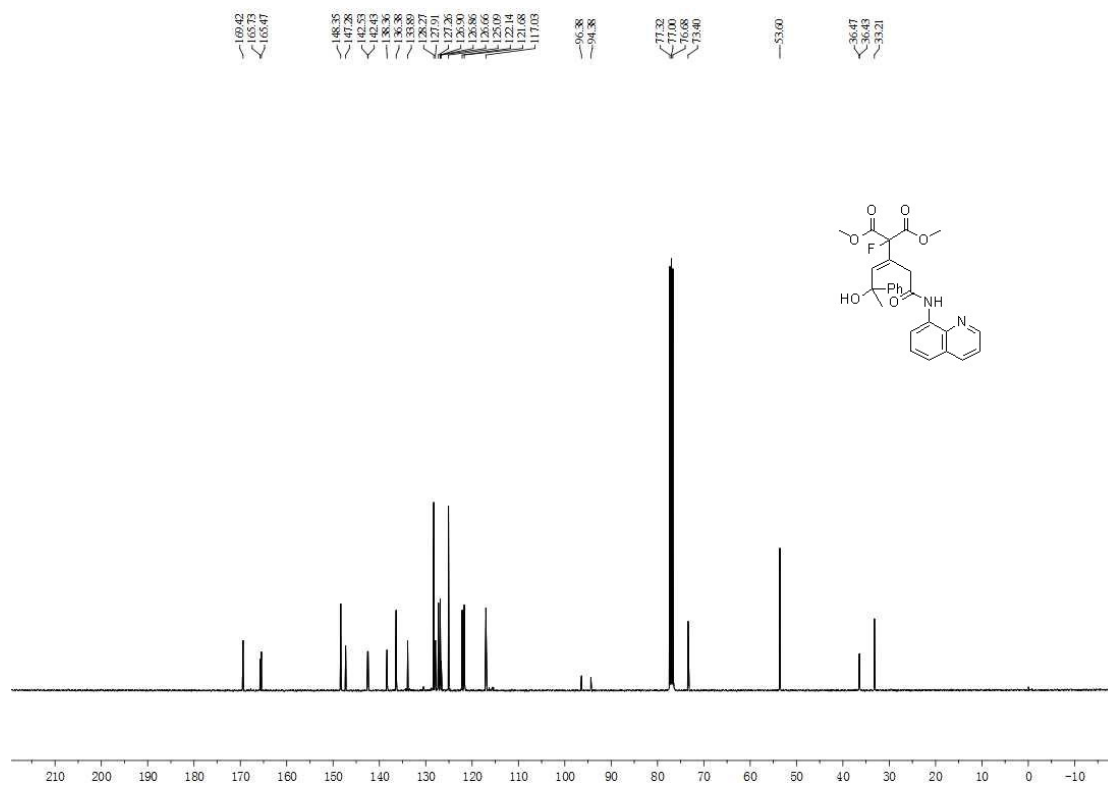

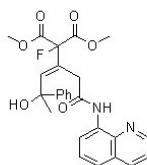

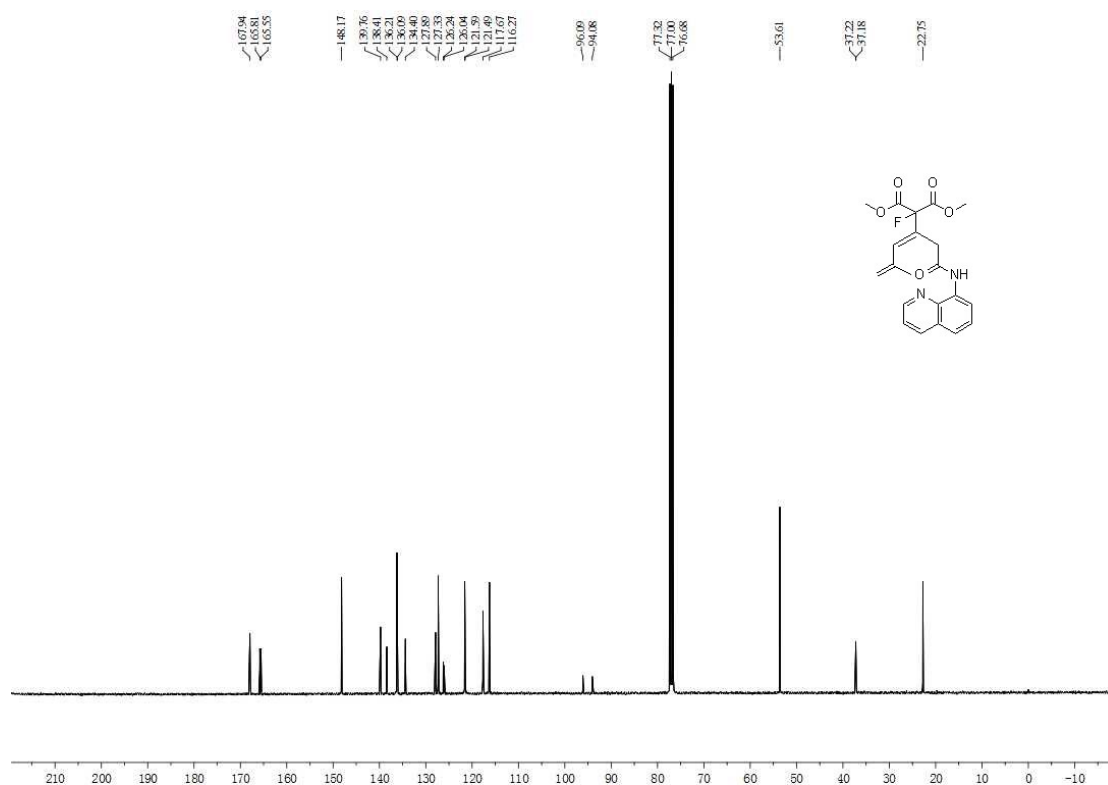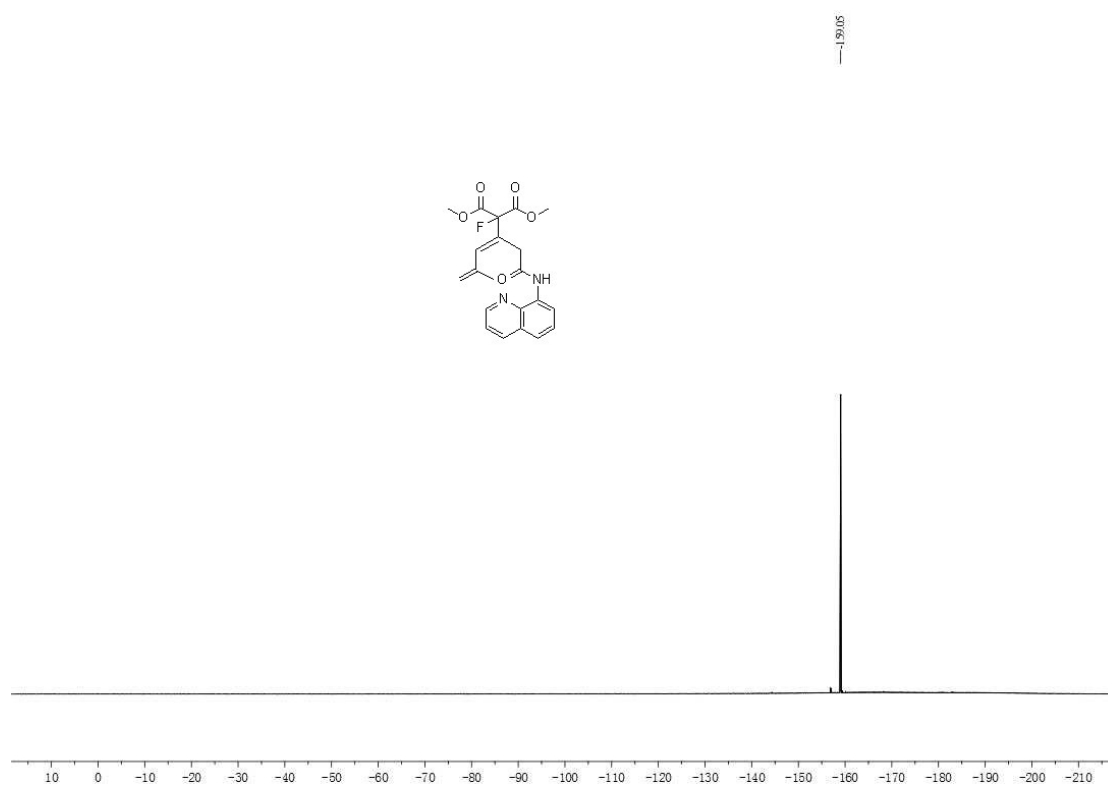



# Product 4am

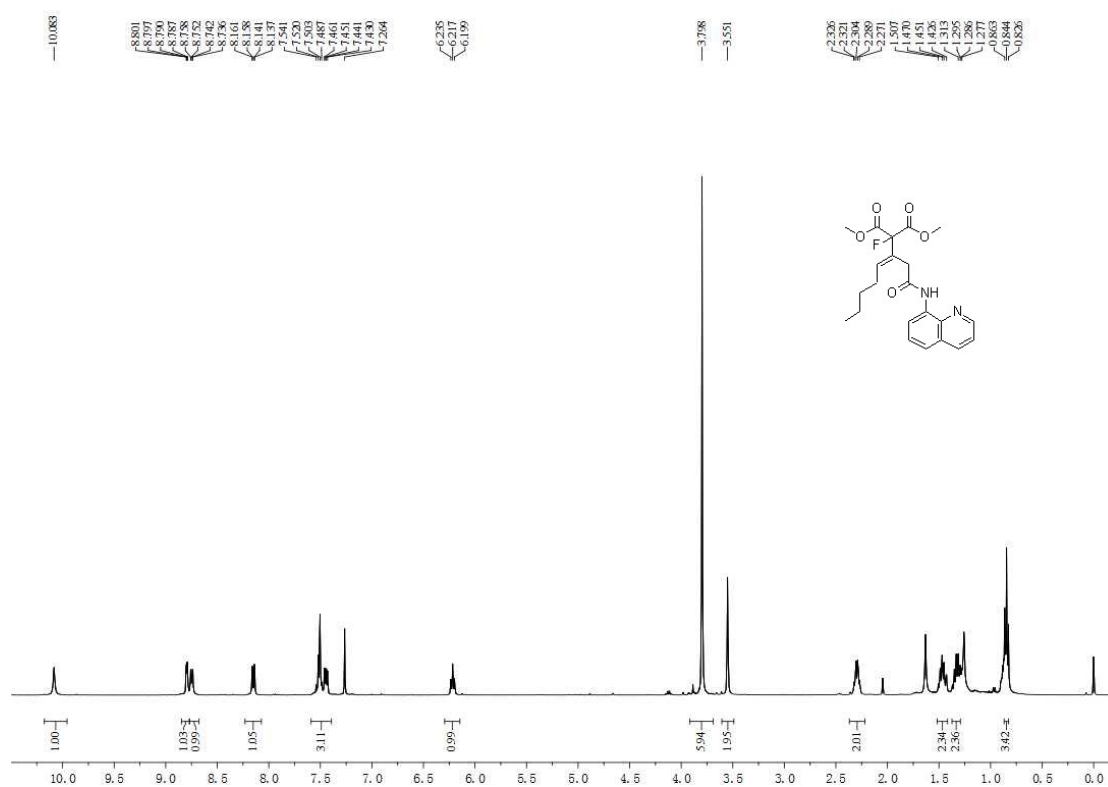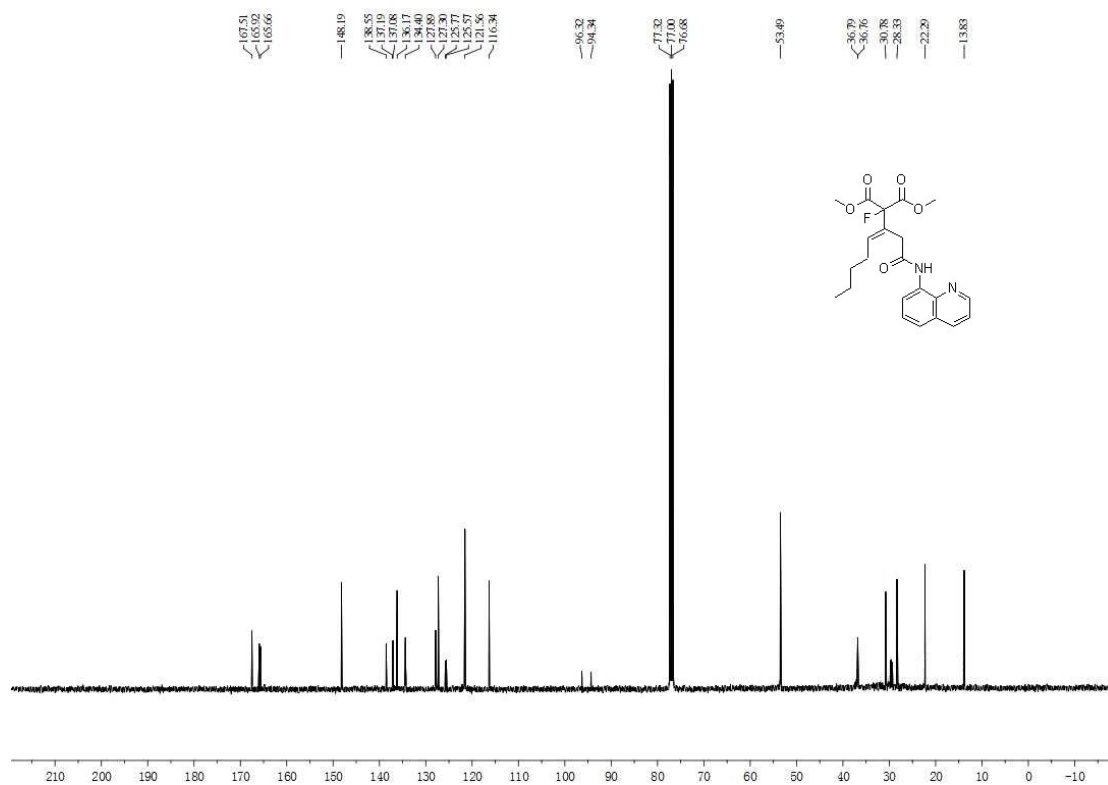

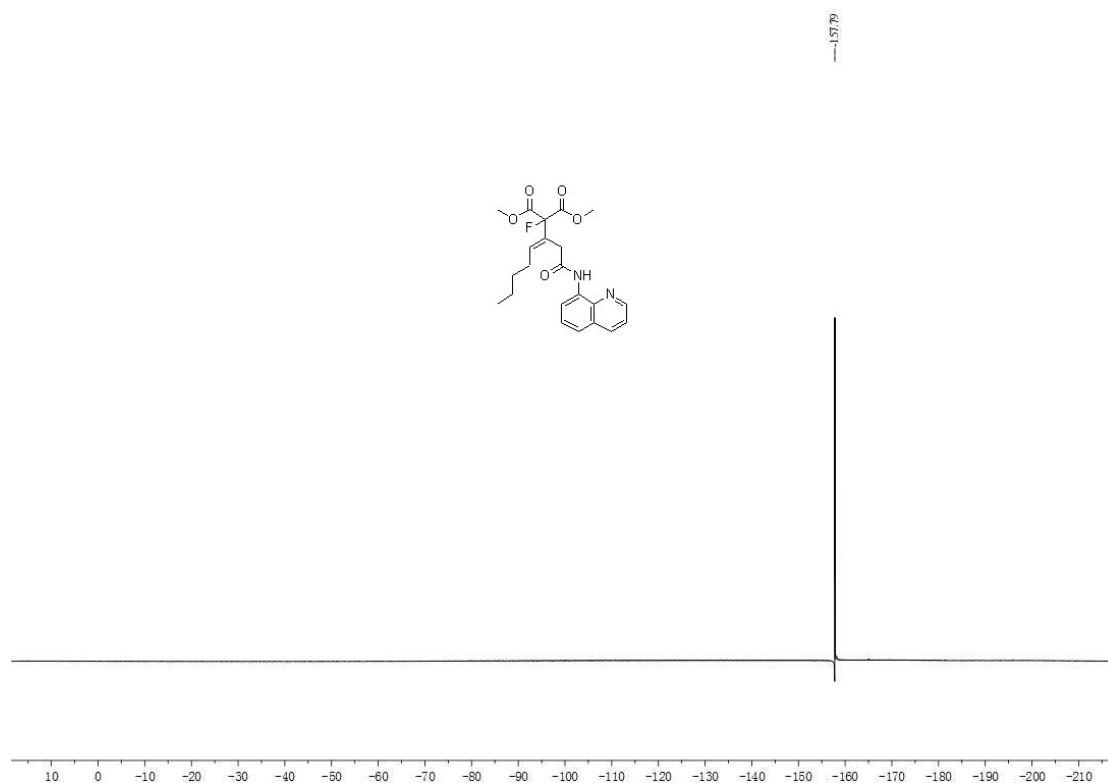

## Product 5b

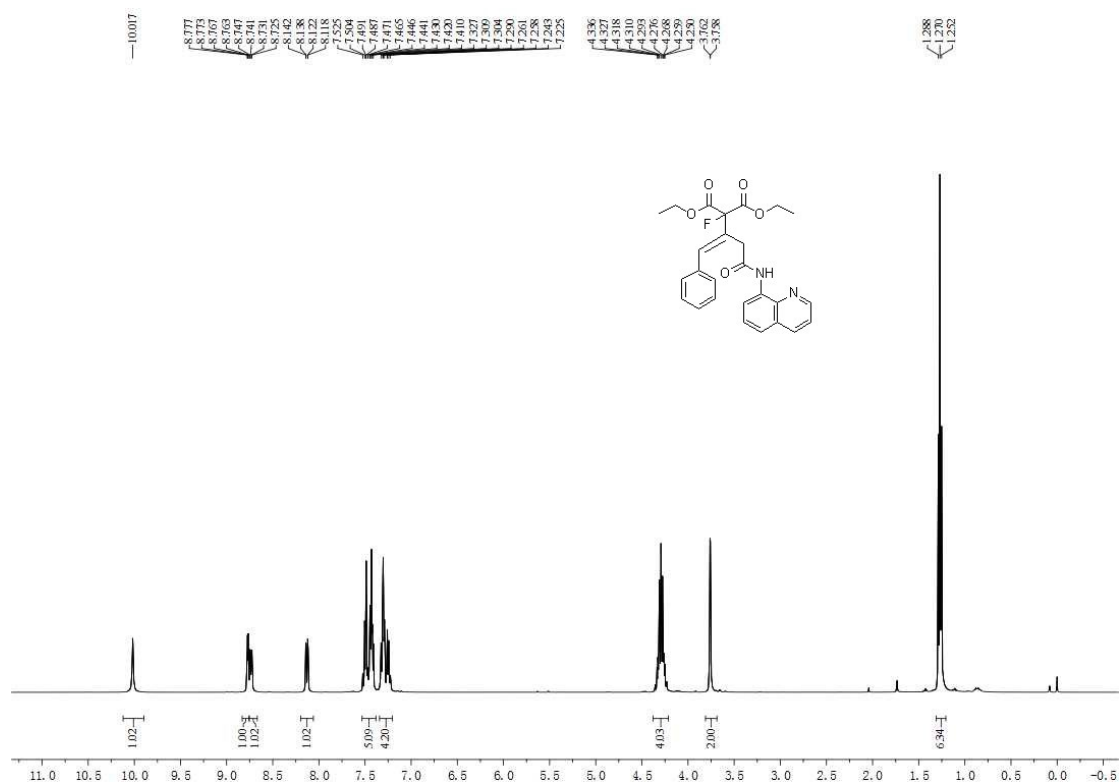

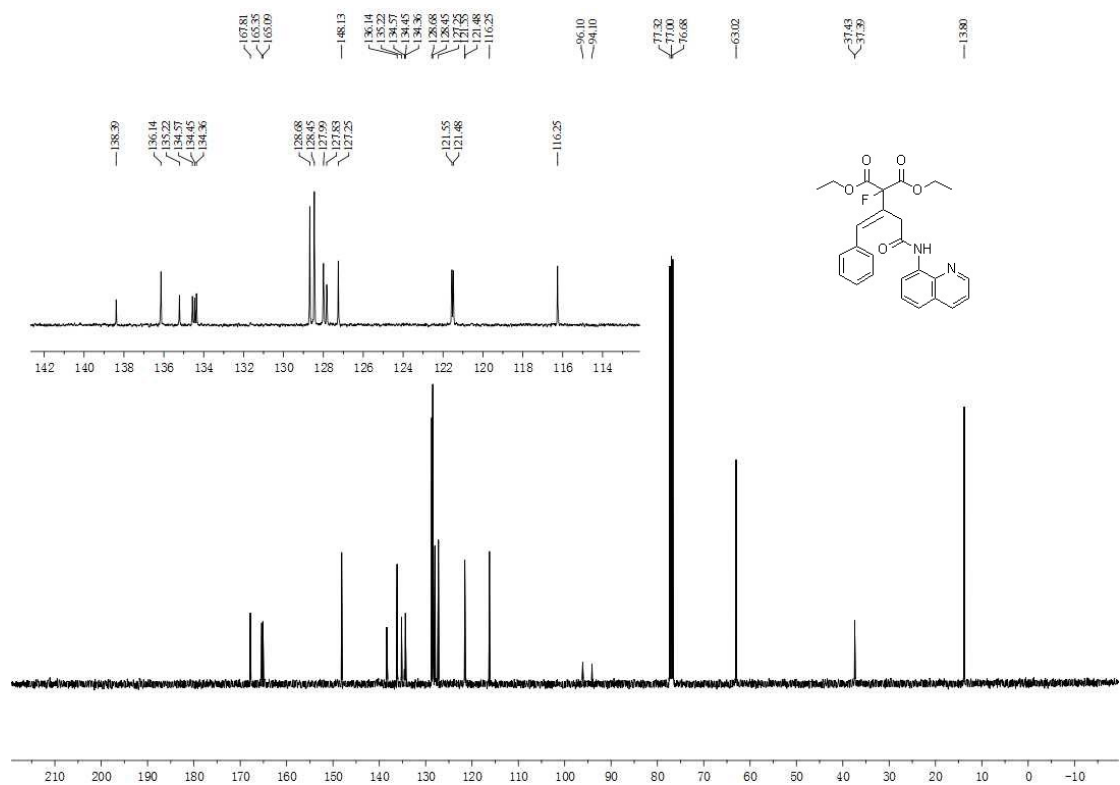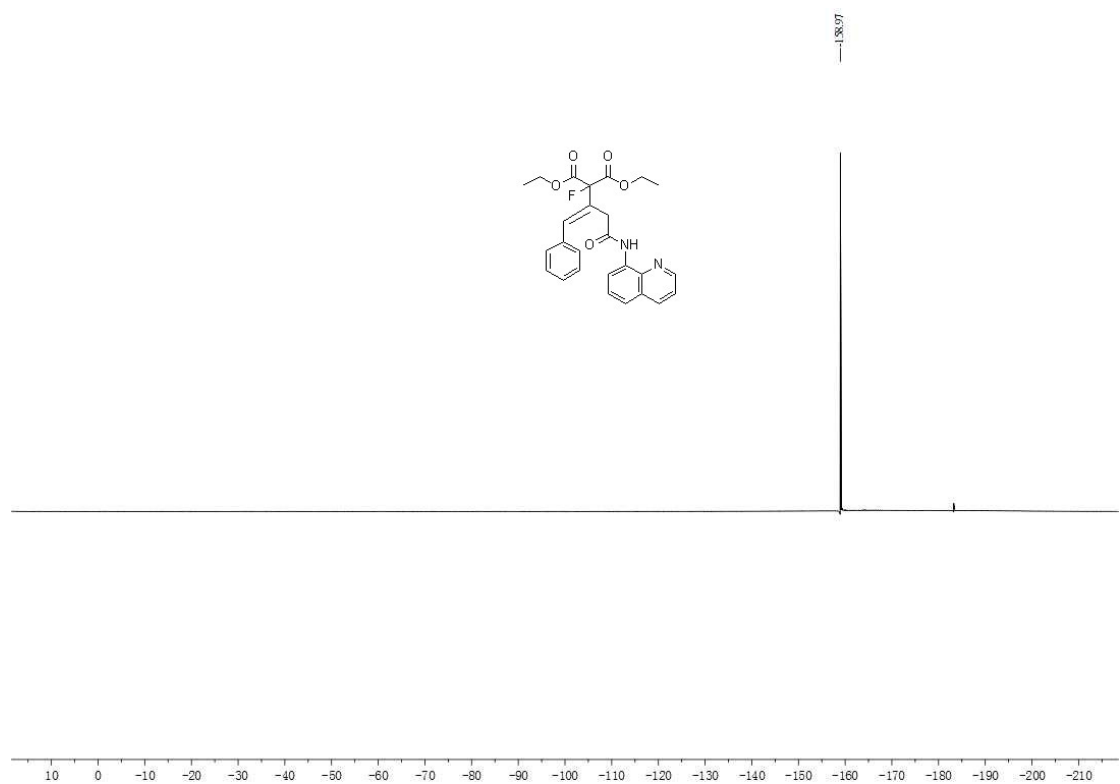

# Product 5c

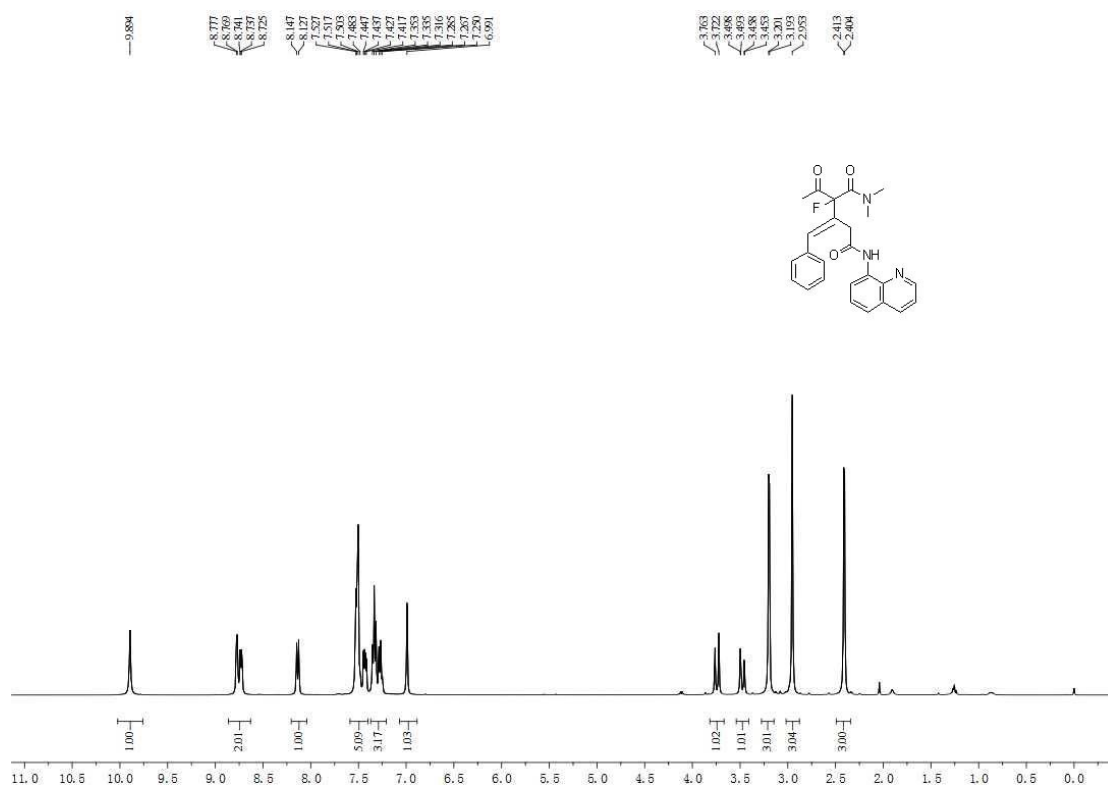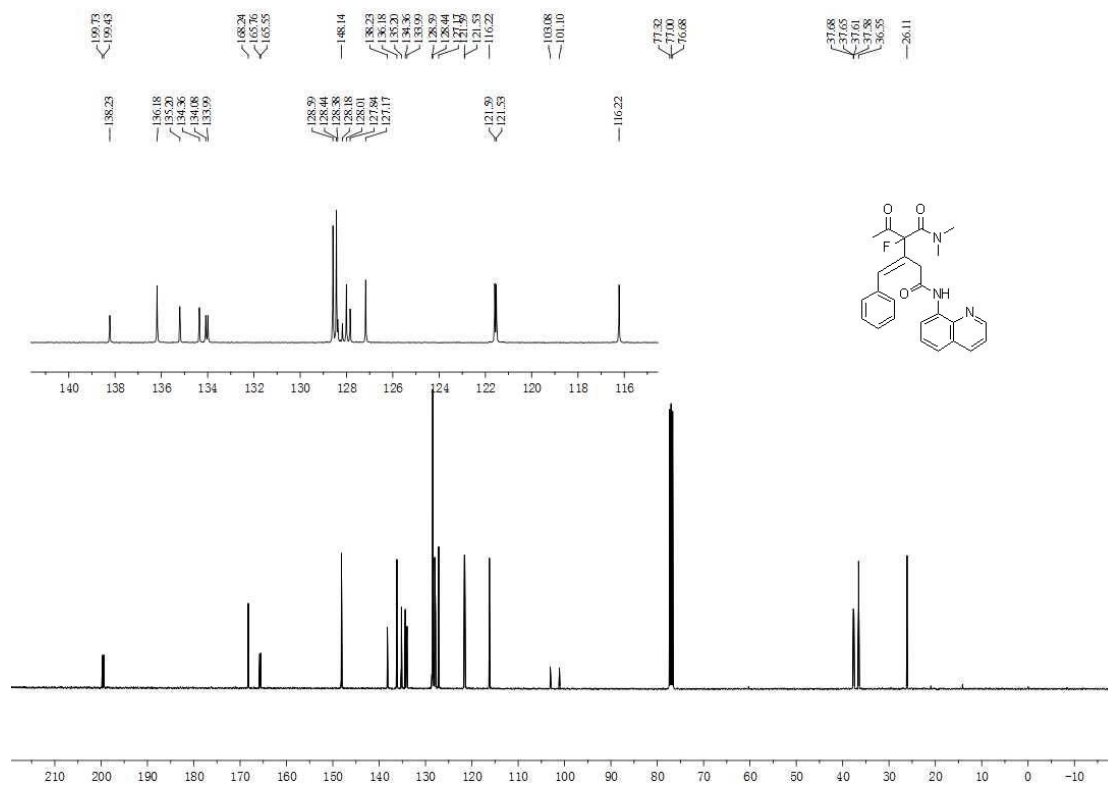

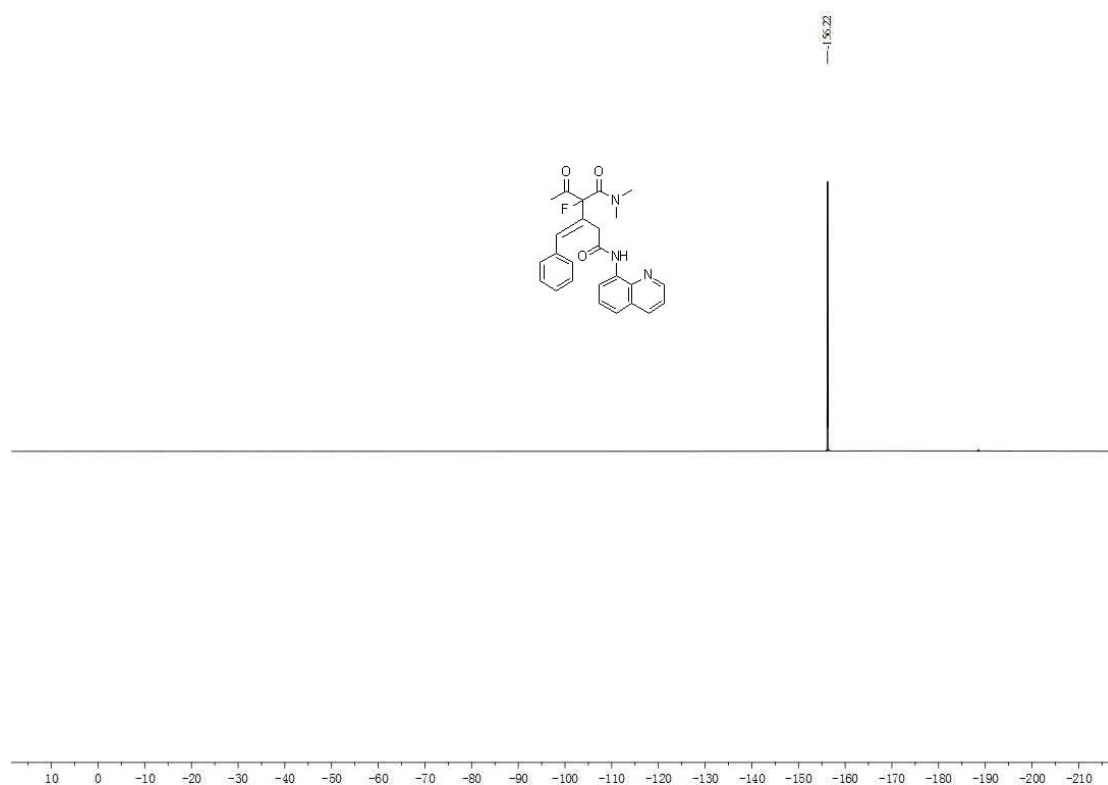

## Product 5d

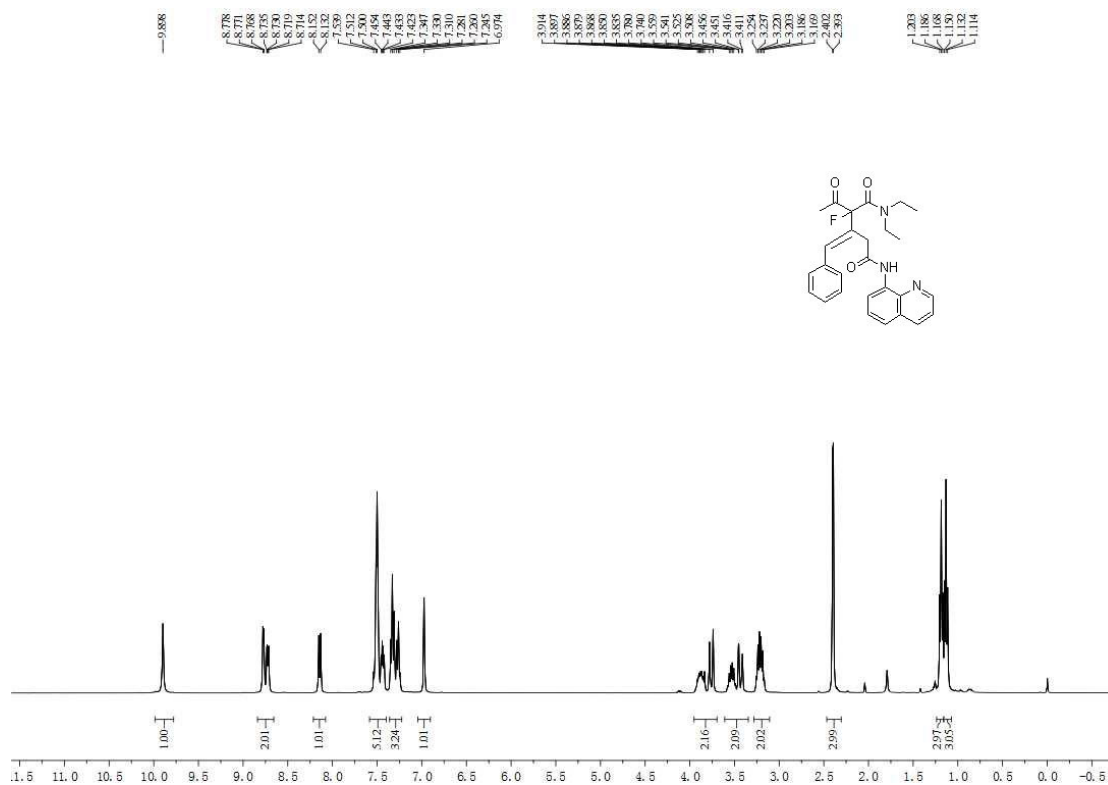

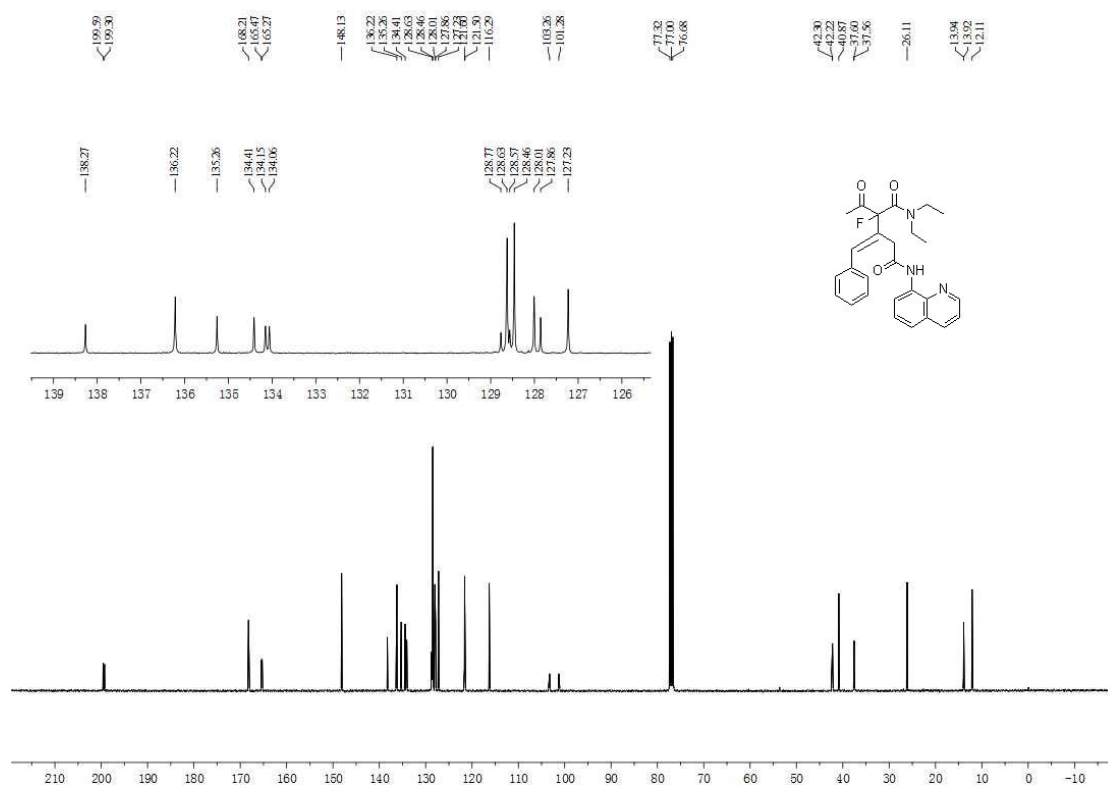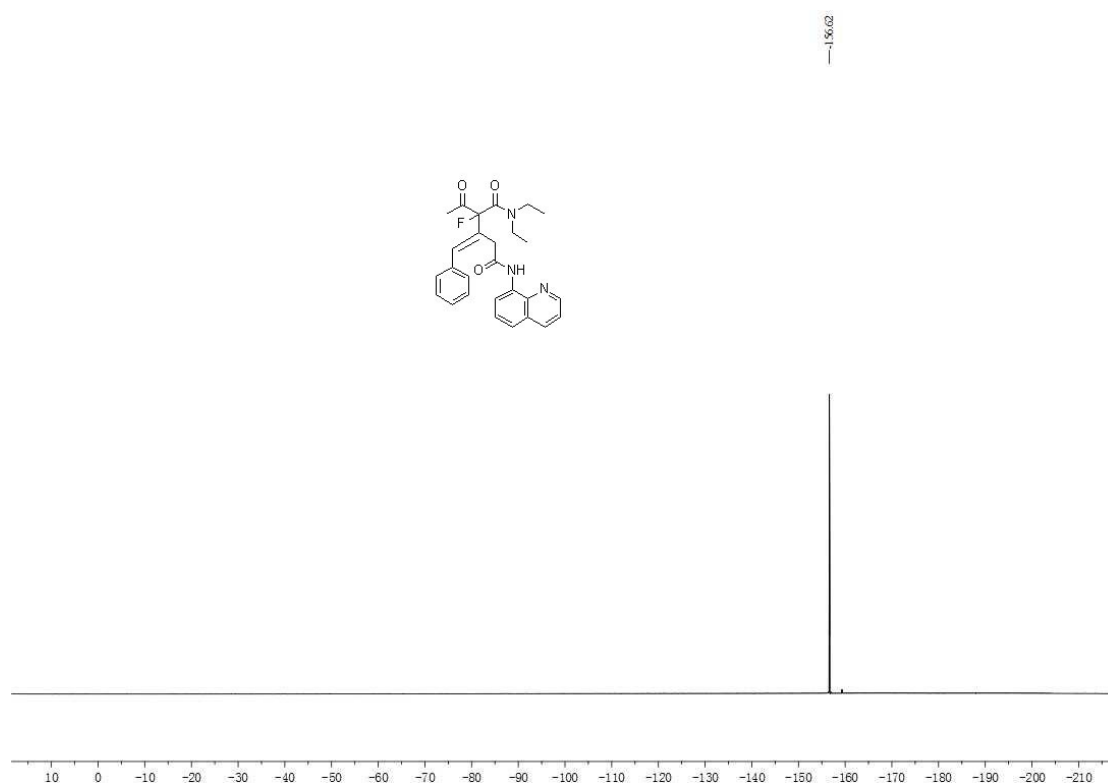

# Product 5e

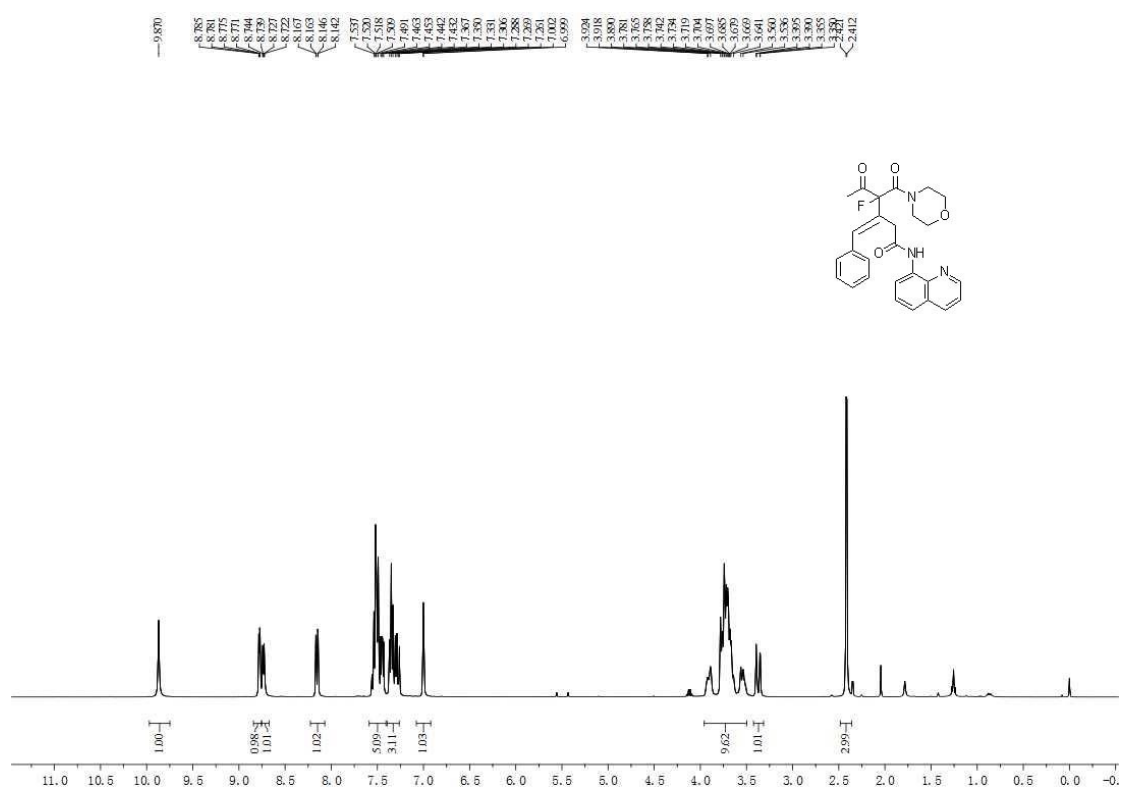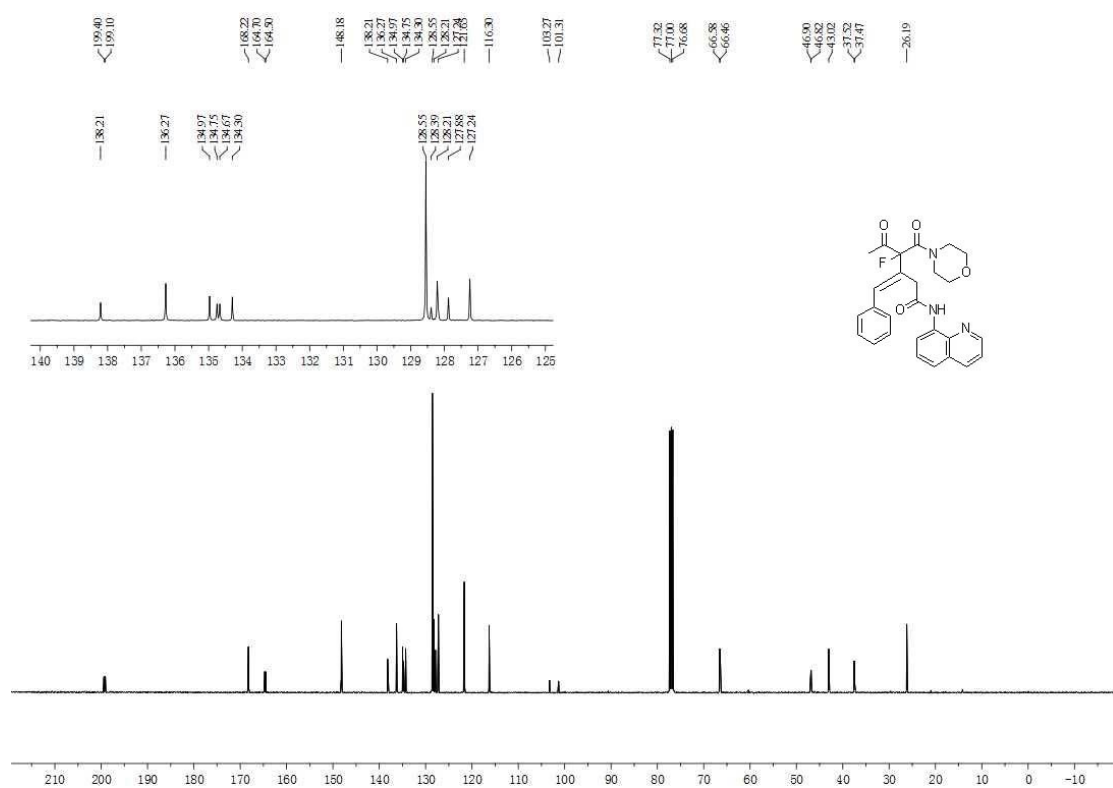

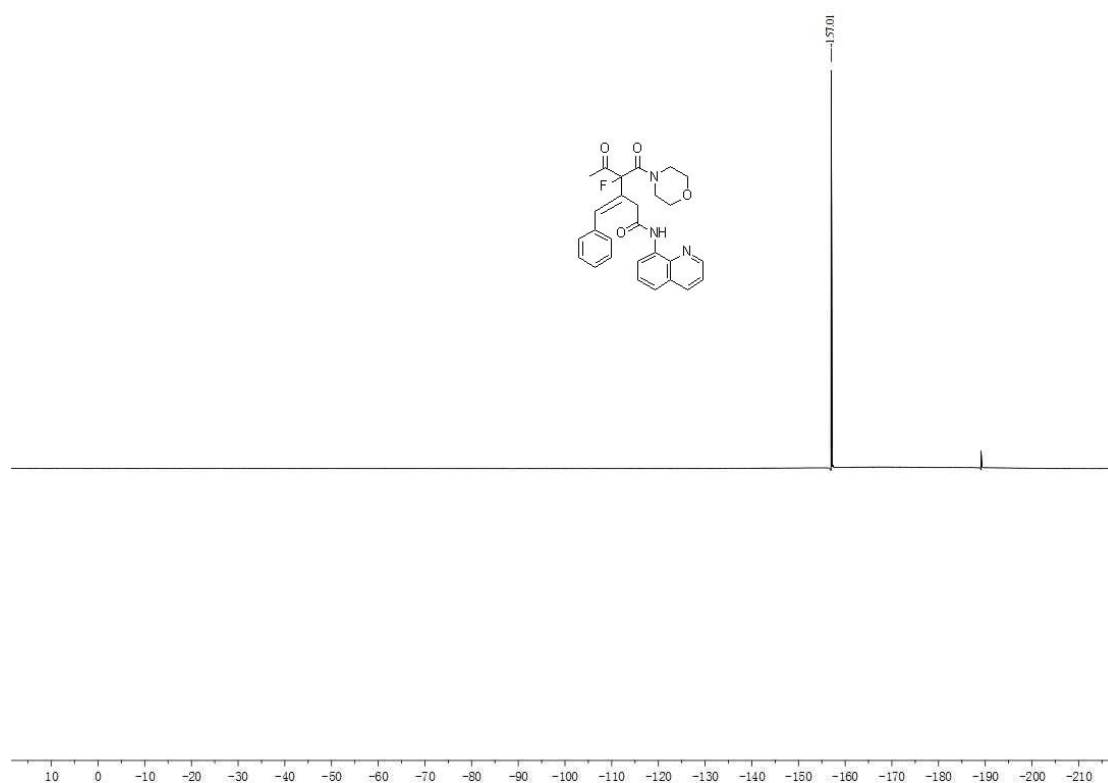

## Product 5f

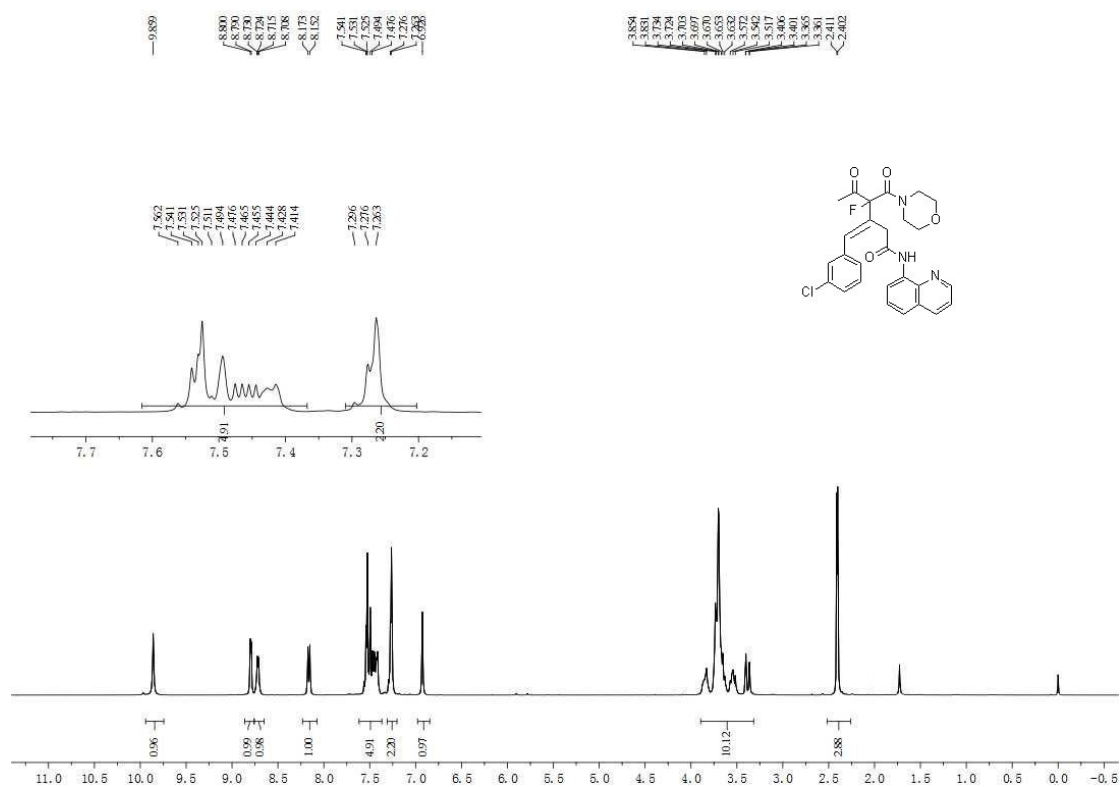



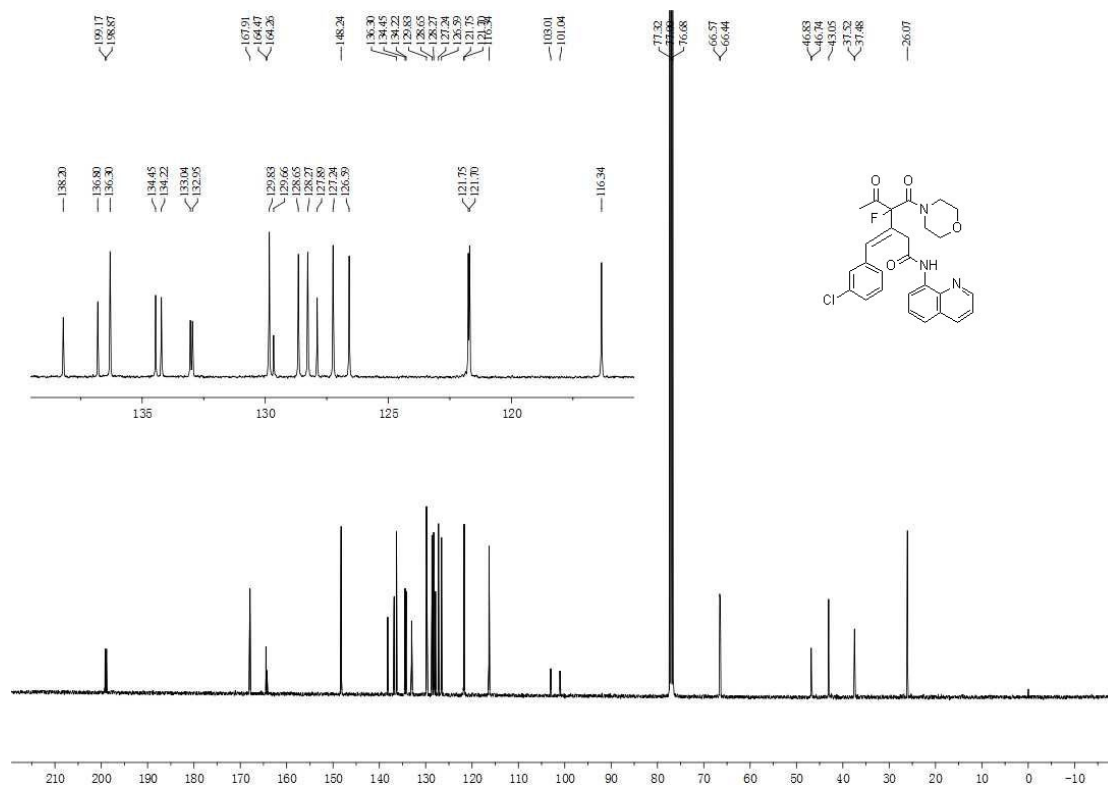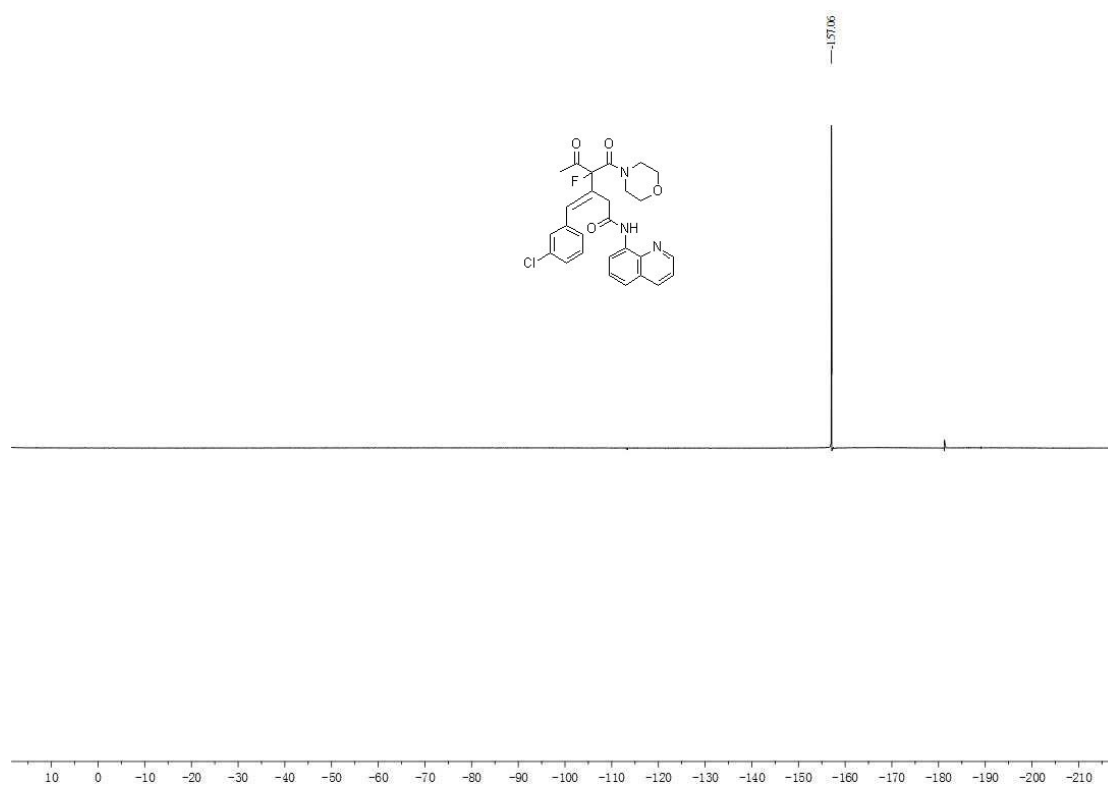

# Product 5g

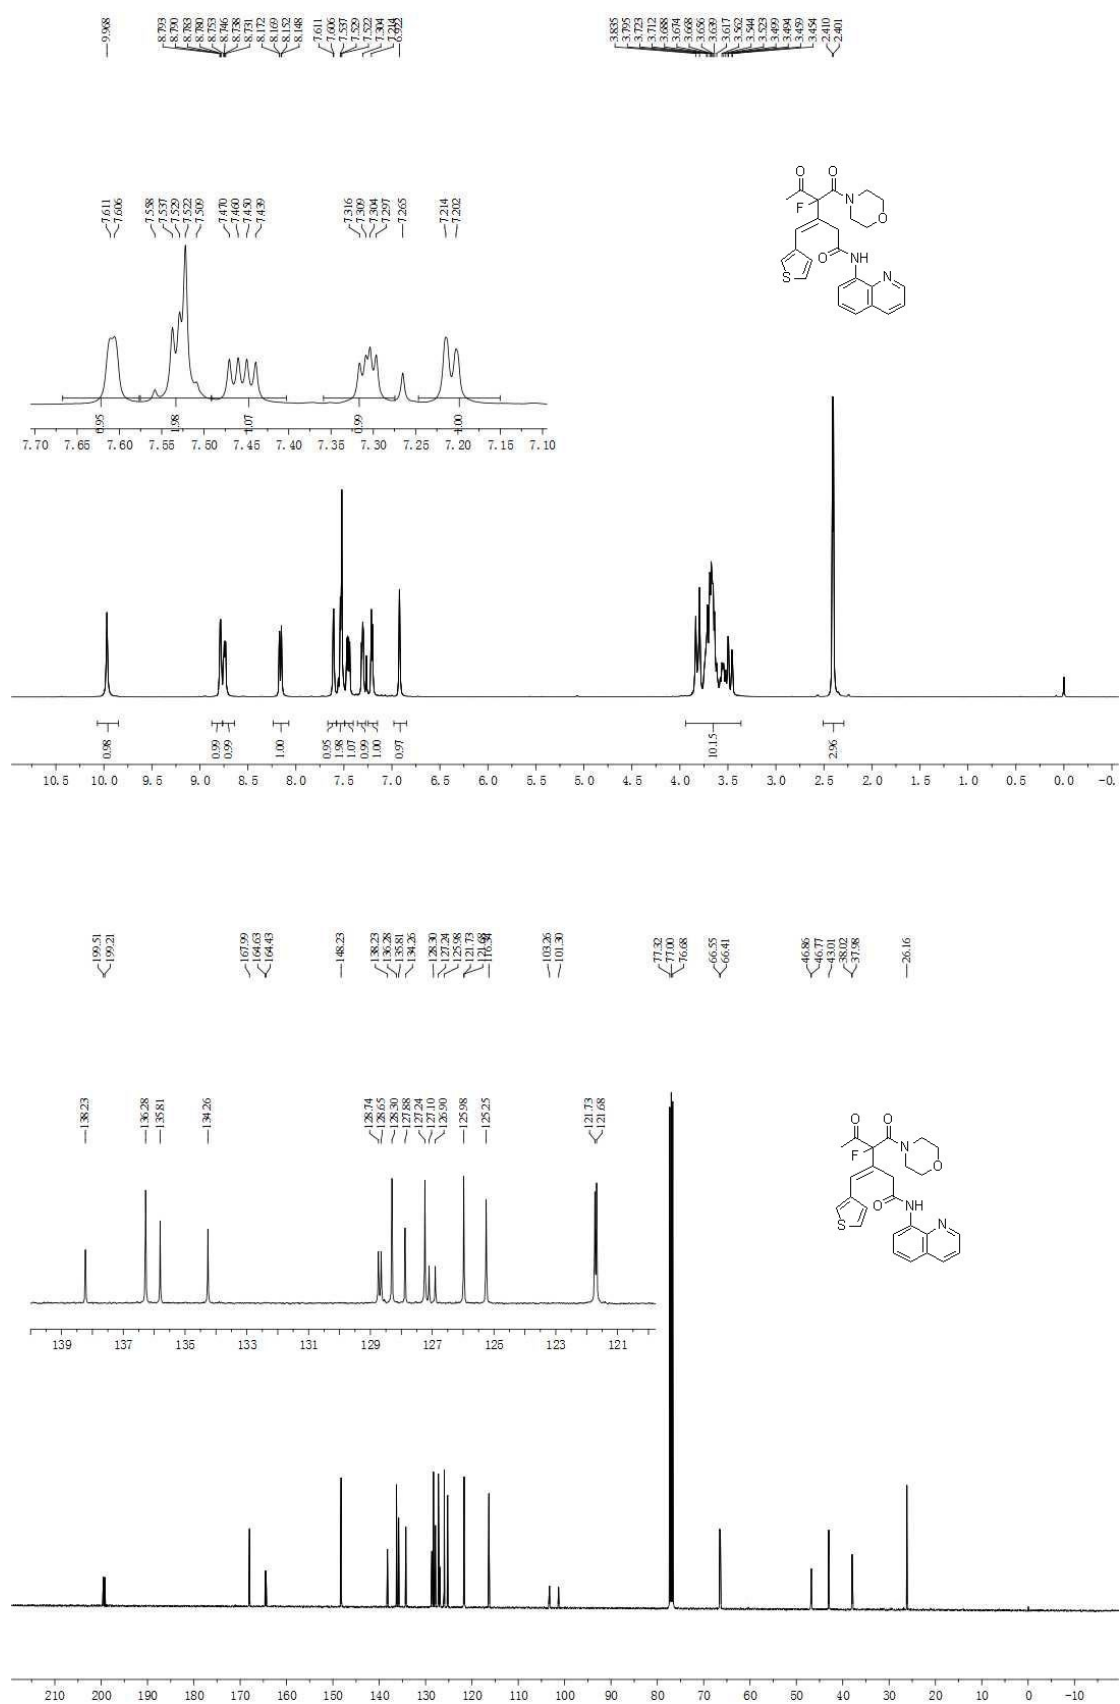

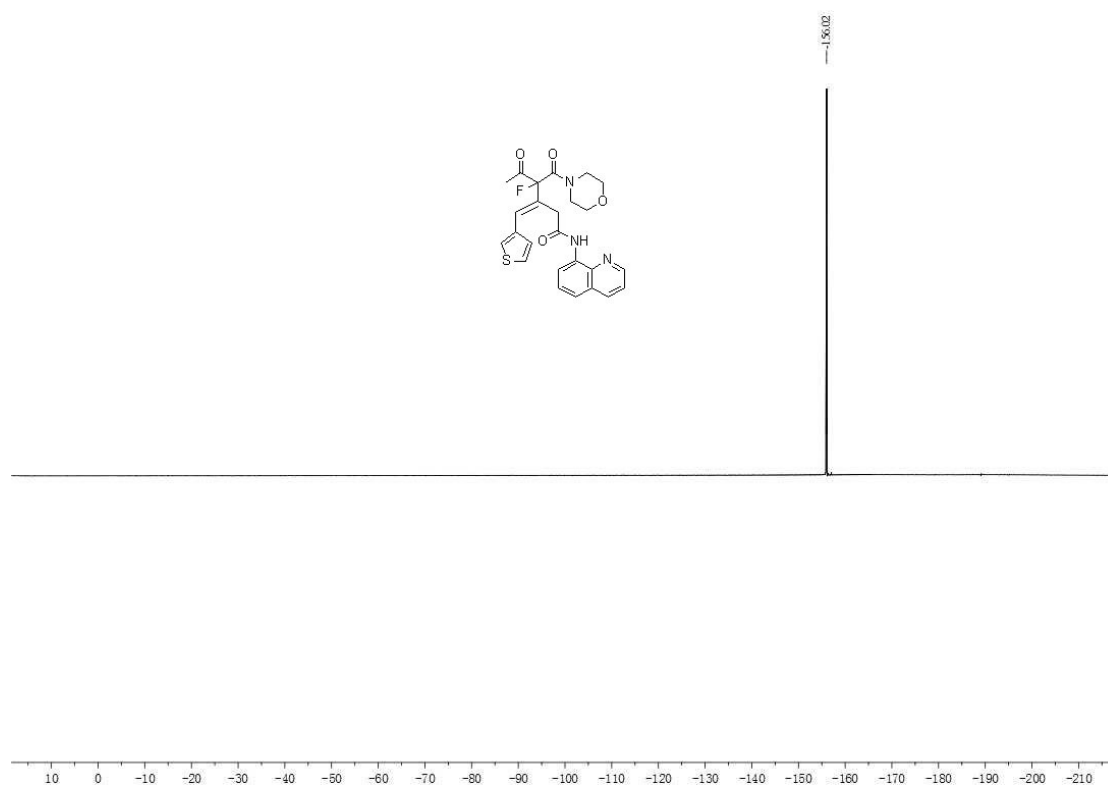

## Product 5h

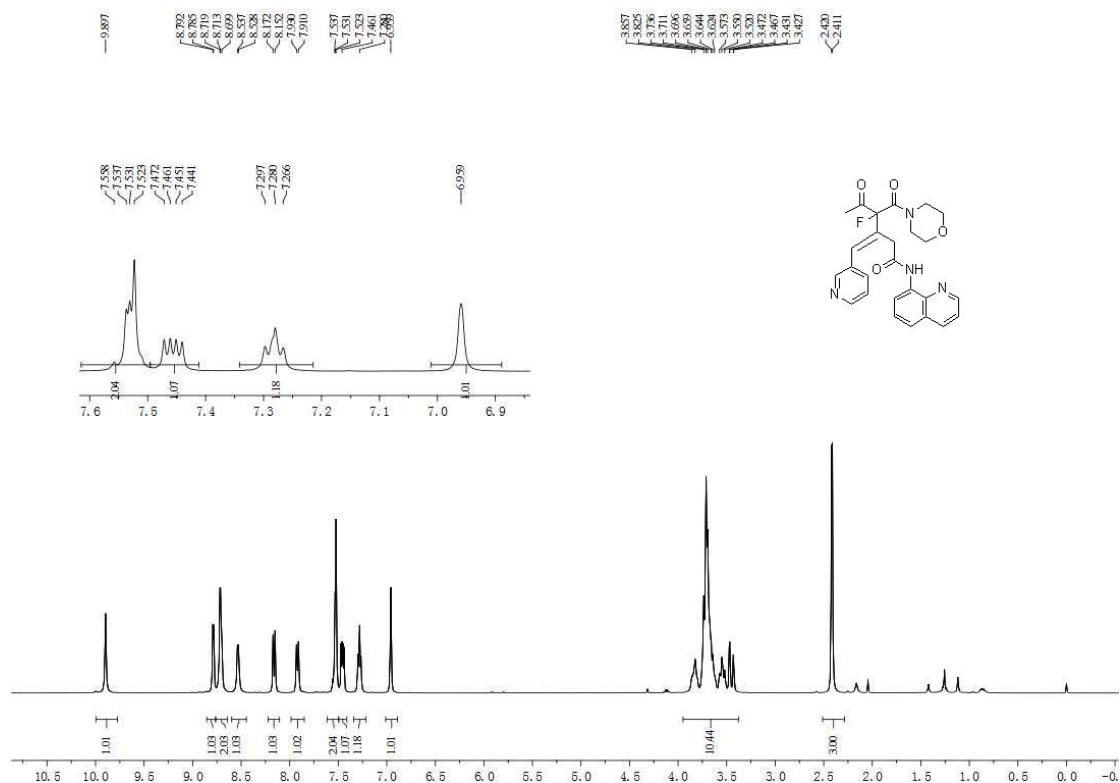

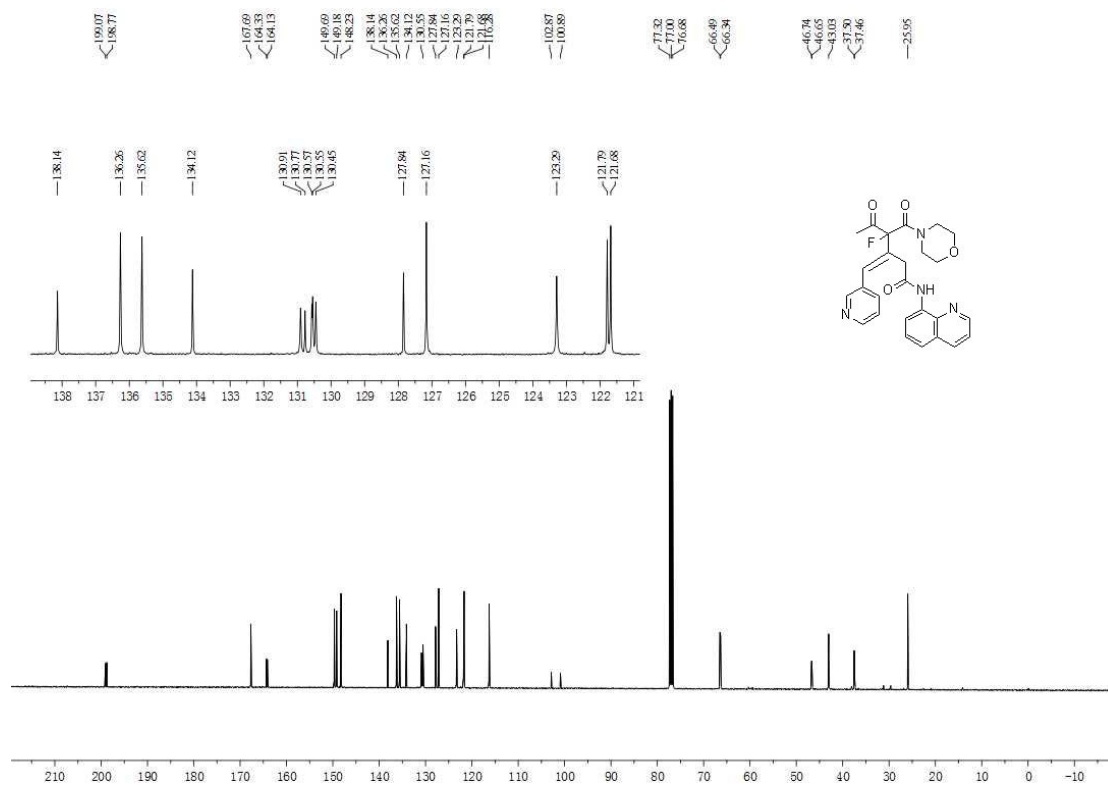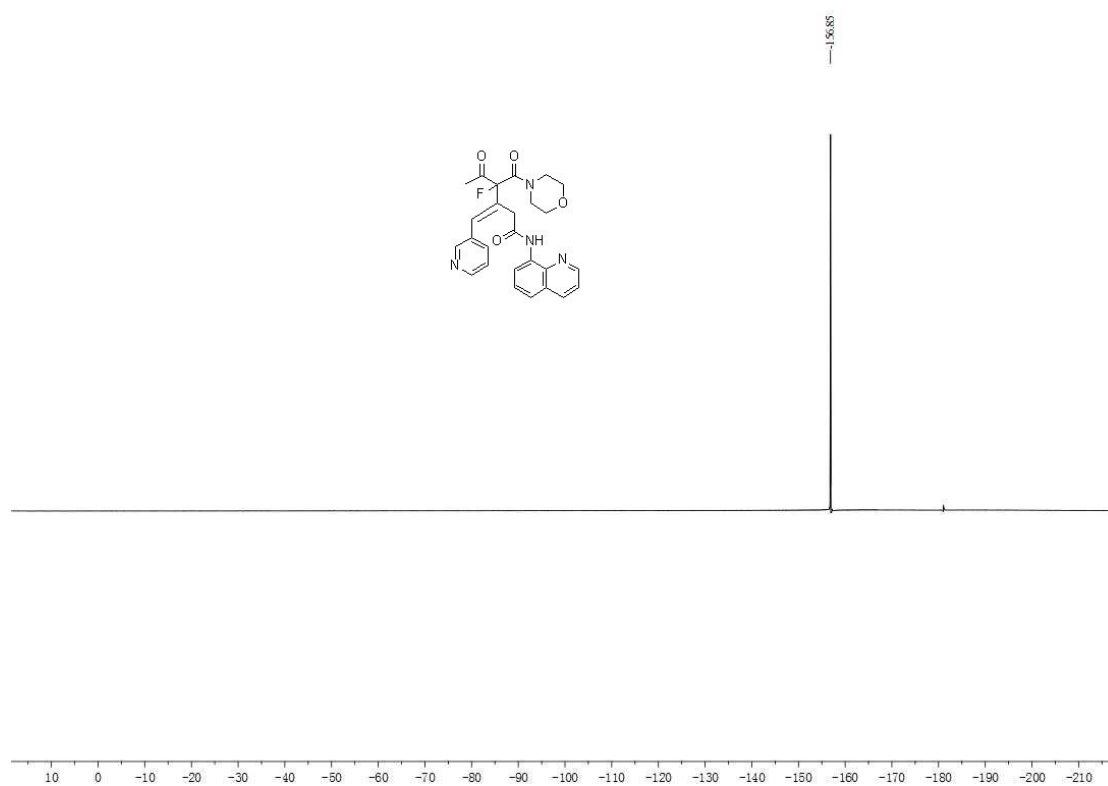

**<sup>1</sup>H NMR** (400 MHz, CDCl<sub>3</sub>): 8.153, 8.149, 8.132, 8.129, 7.784, 7.776, 7.763, 7.753, 7.730, 7.689, 7.673, 7.672, 7.667, 7.659, 7.594, 7.584, 7.473, 7.463, 7.442, 7.431, 4.855, 4.851, 4.841, 4.570, 4.569, 3.986, 3.980, 3.885, 3.660, 3.639, 3.635, 3.580, 3.573, 3.552, 3.552, 3.509, 3.485, 3.455, 2.328, 2.319.

**<sup>13</sup>C NMR** (100 MHz, CDCl<sub>3</sub>): 199.11, 198.82, 167.60, 166.95, 164.07, 163.86, 148.23, 138.15, 136.14, 134.17, 133.89, 131.88, 131.62, 130.83, 128.22, 127.12, 127.10, 127.06, 123.19, 123.16, 121.62, 102.05, 100.06, 77.22, 77.10, 76.08, 66.37, 66.17, 46.57, 46.48, 46.33, 36.32, 36.28, 35.36, 25.93.

**Chemical Structure of 10**: CC(=O)C(F)(C(=O)N1Cc2ccccc2C1=O)C=C(NC(=O)N1Cc2ccccc2C1=O)C(=O)N1CCOCC1

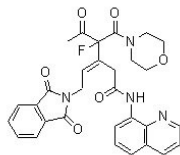

—9.966

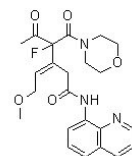

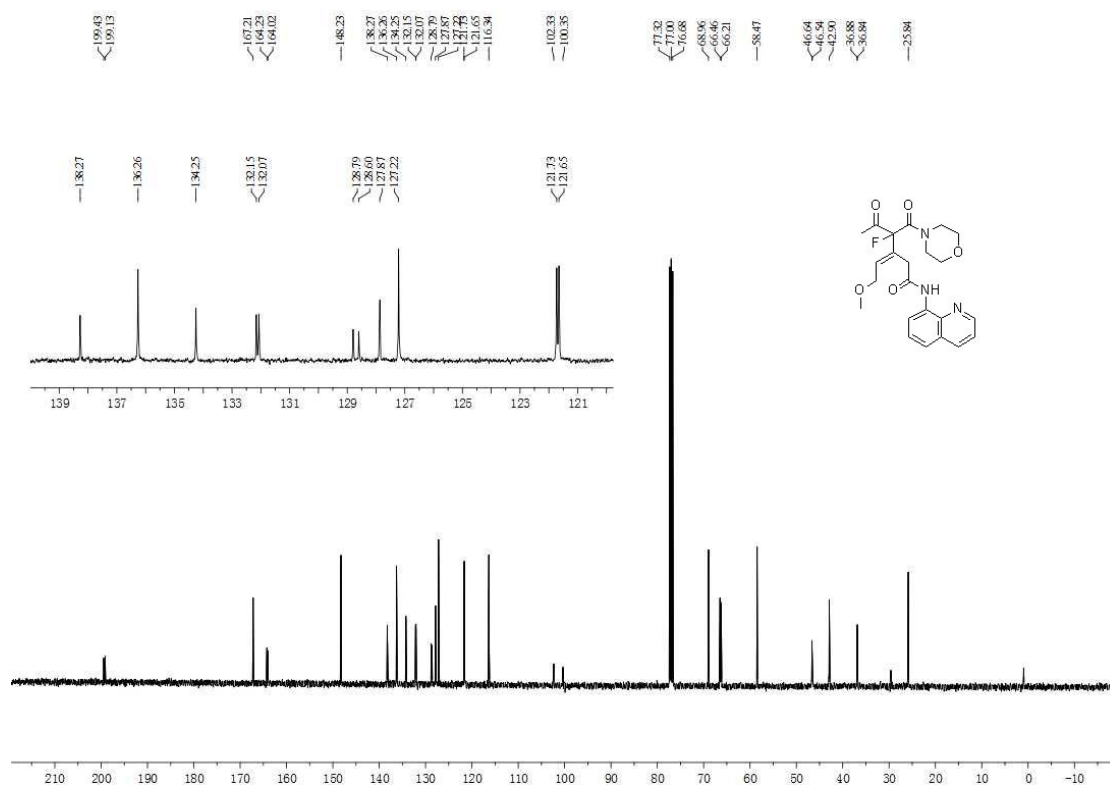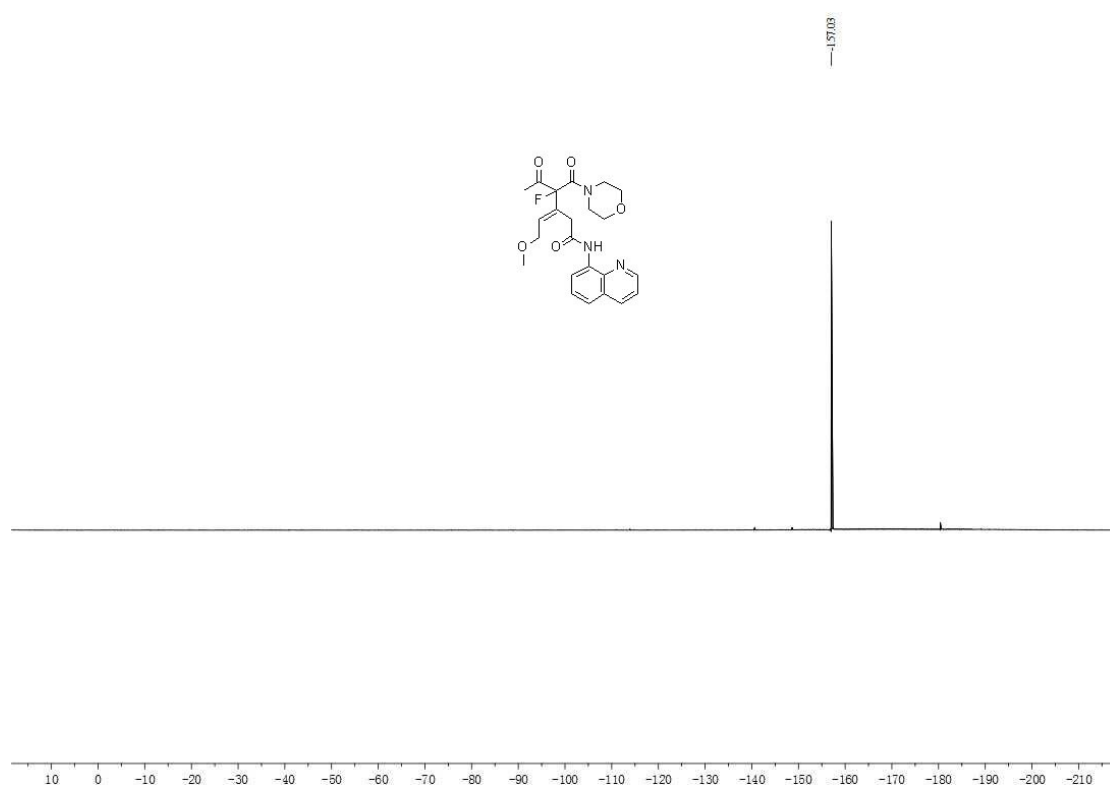

# Product 5k

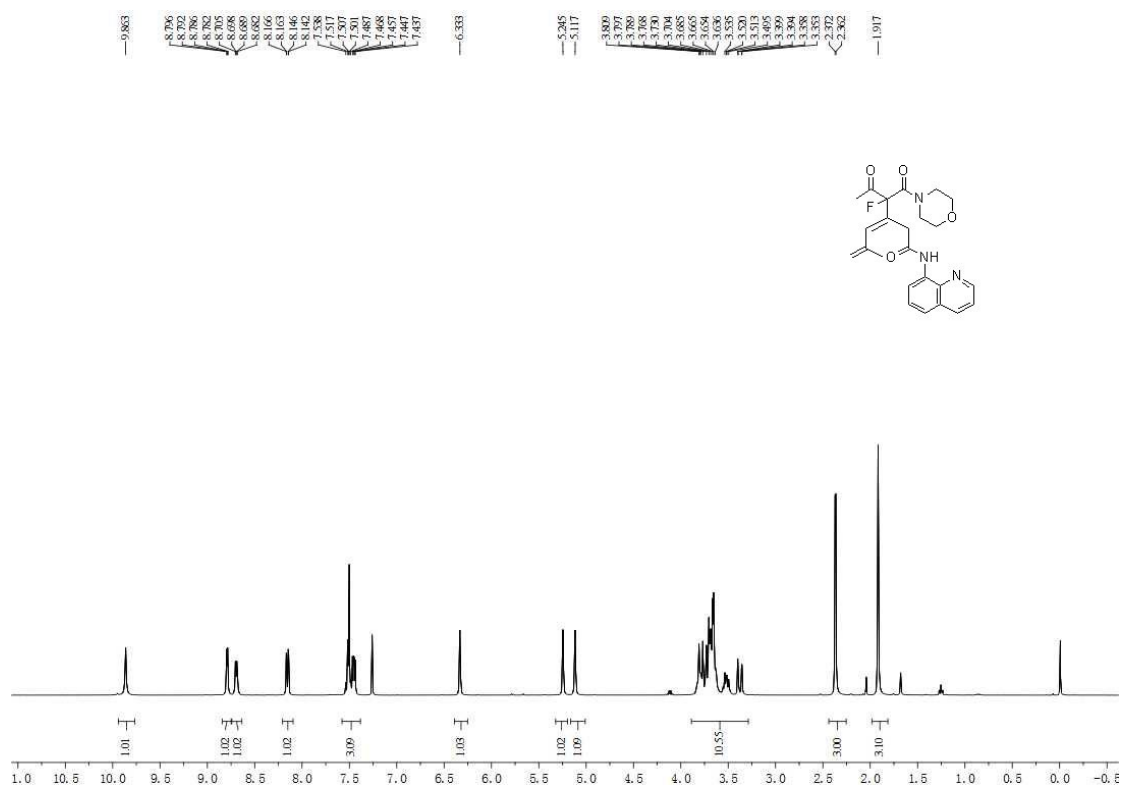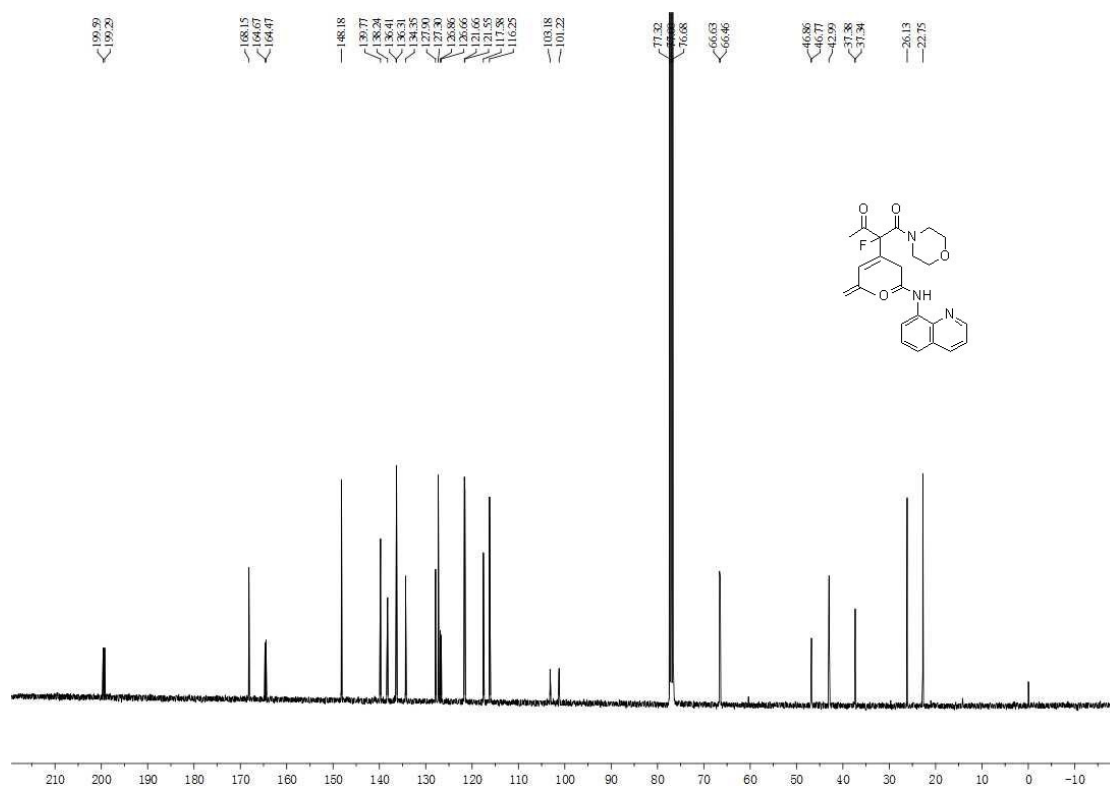



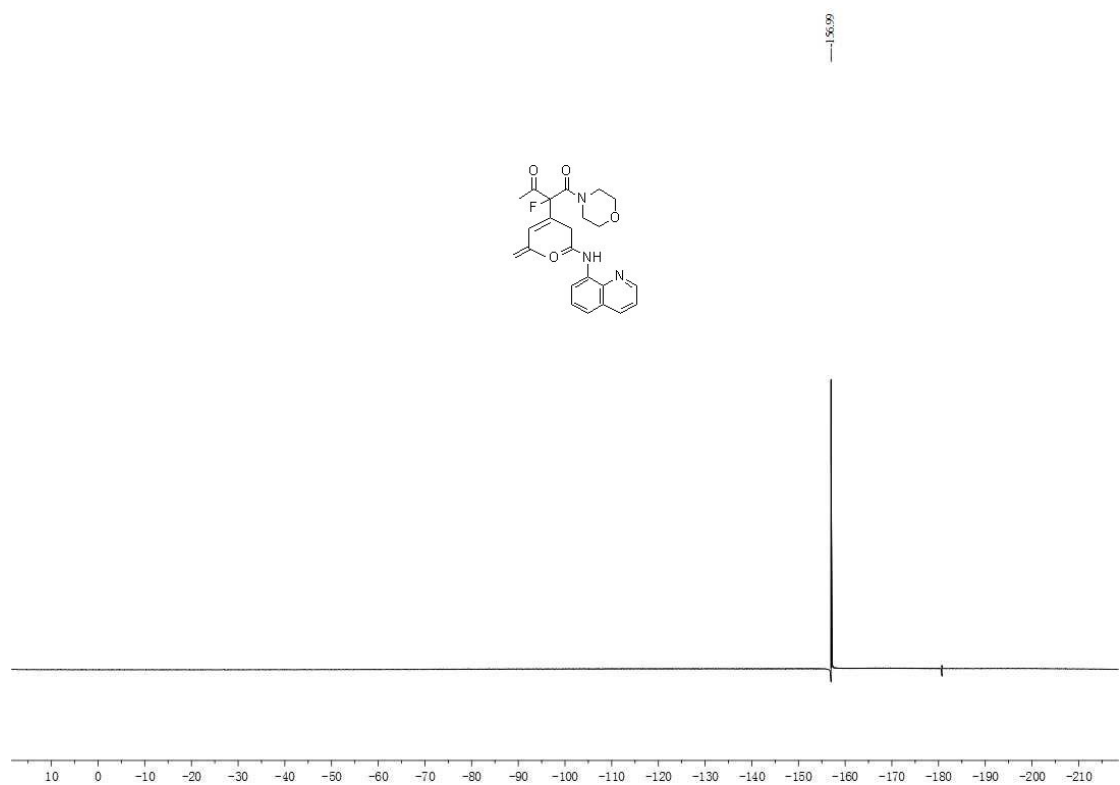

## Product 7

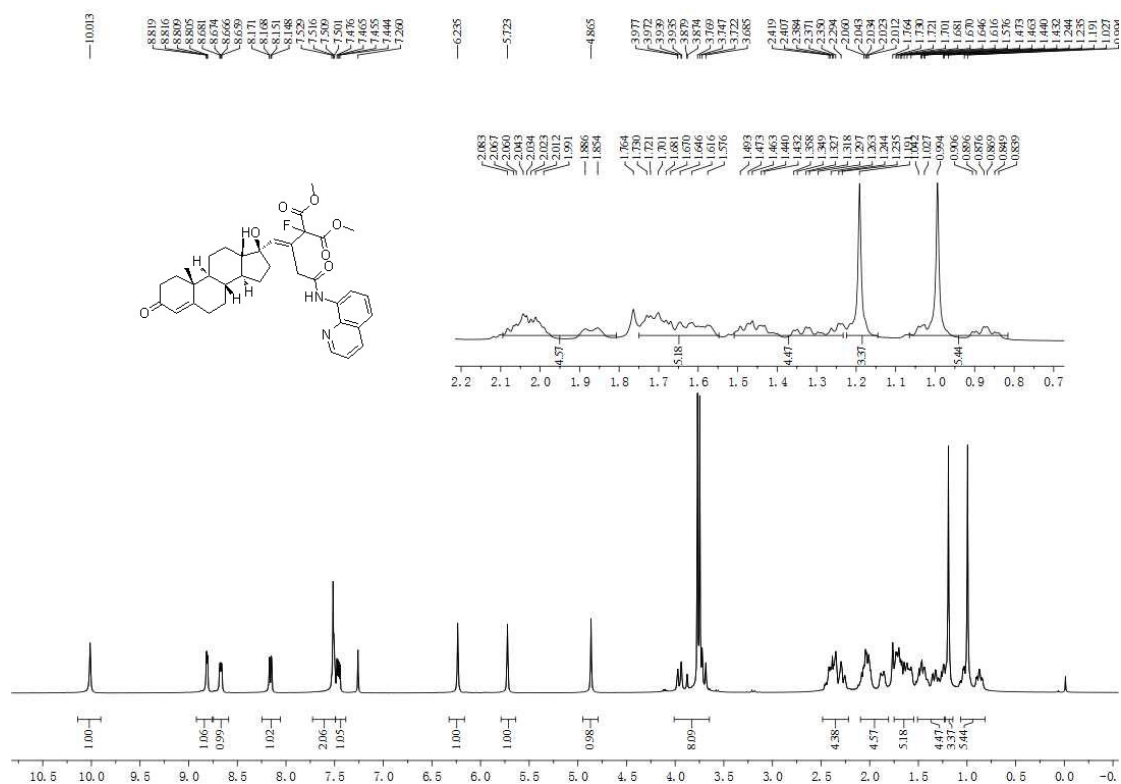

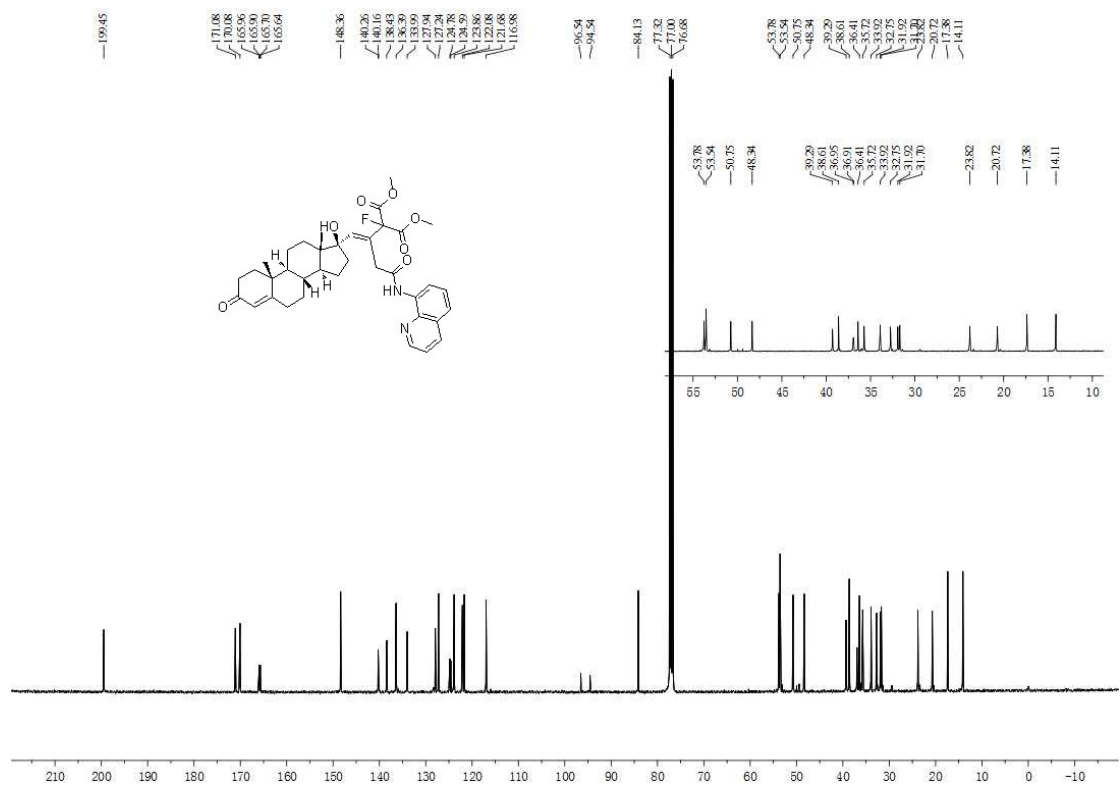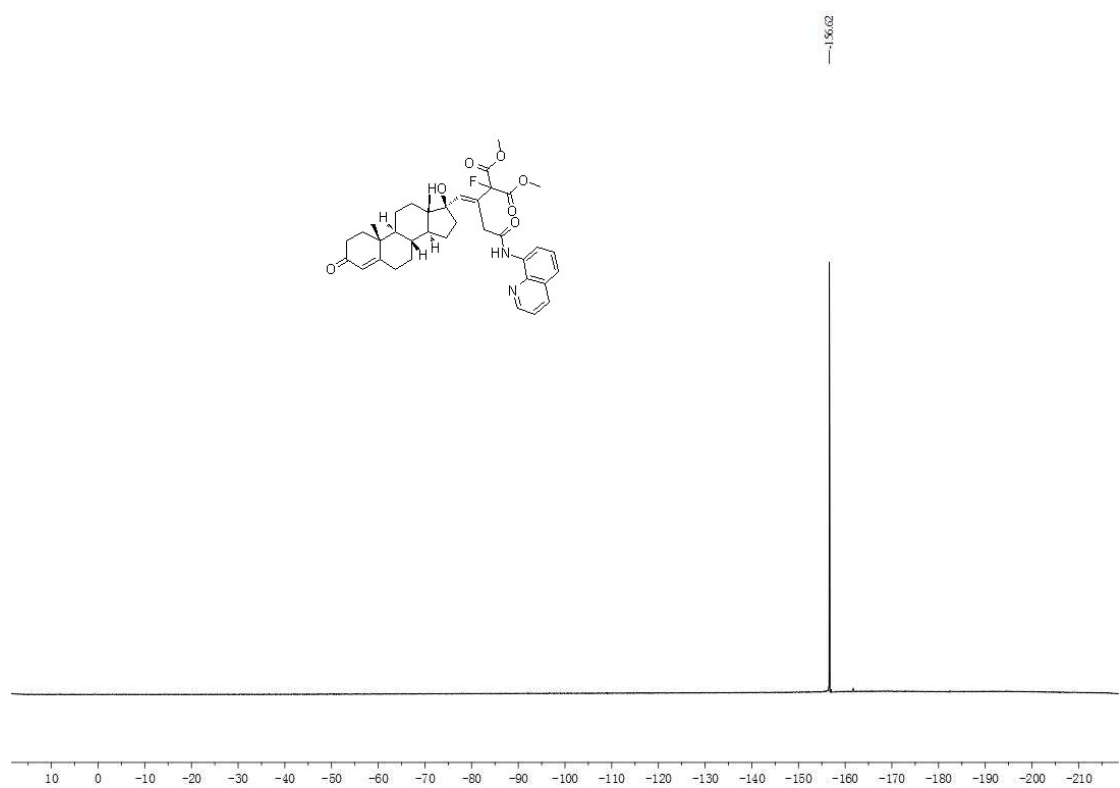

# Product 9

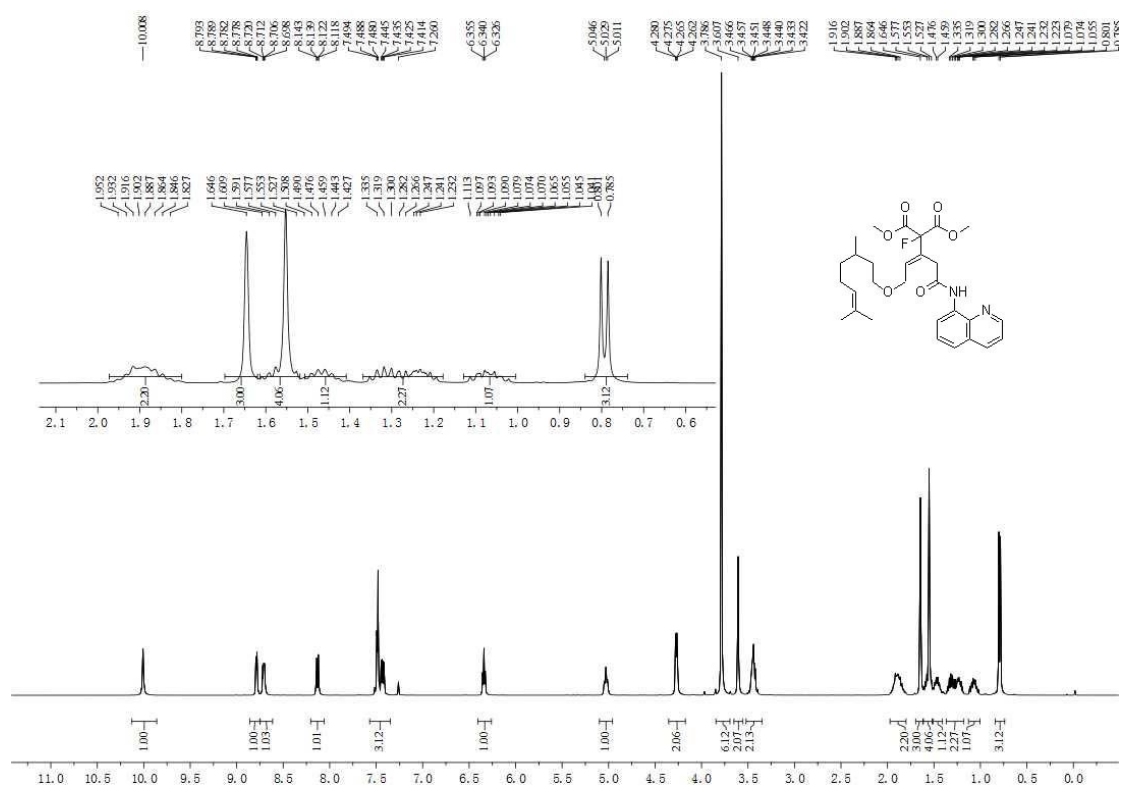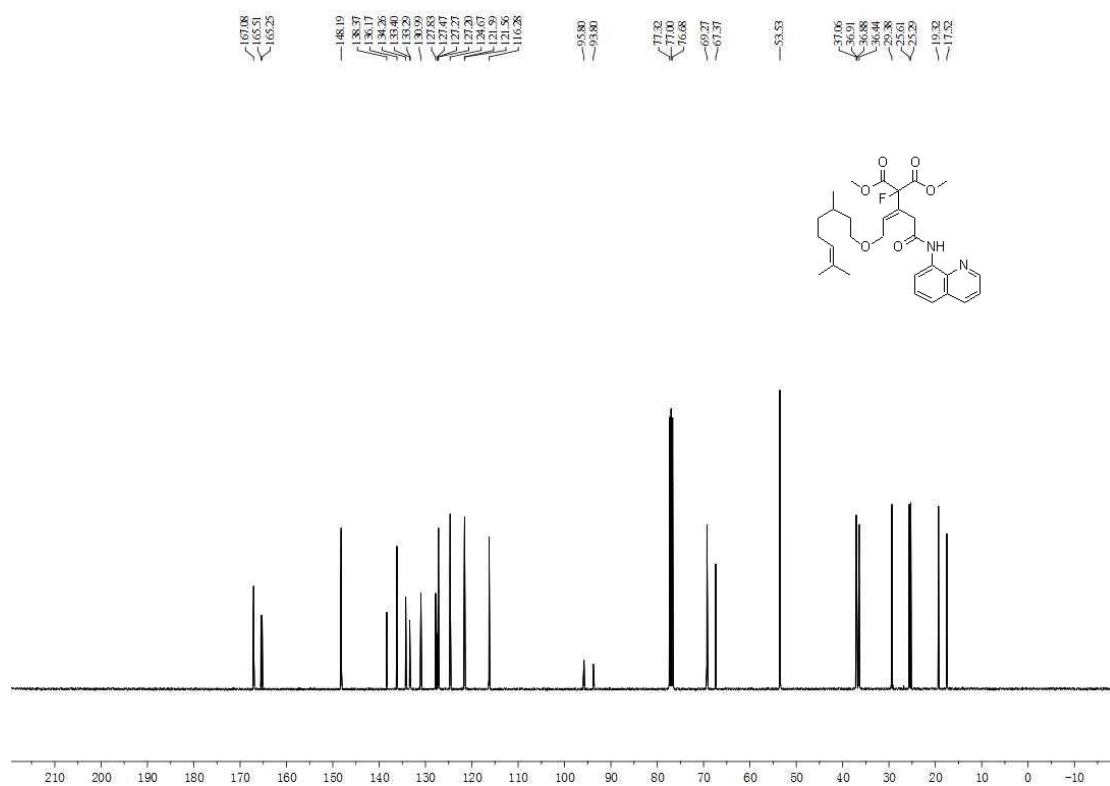

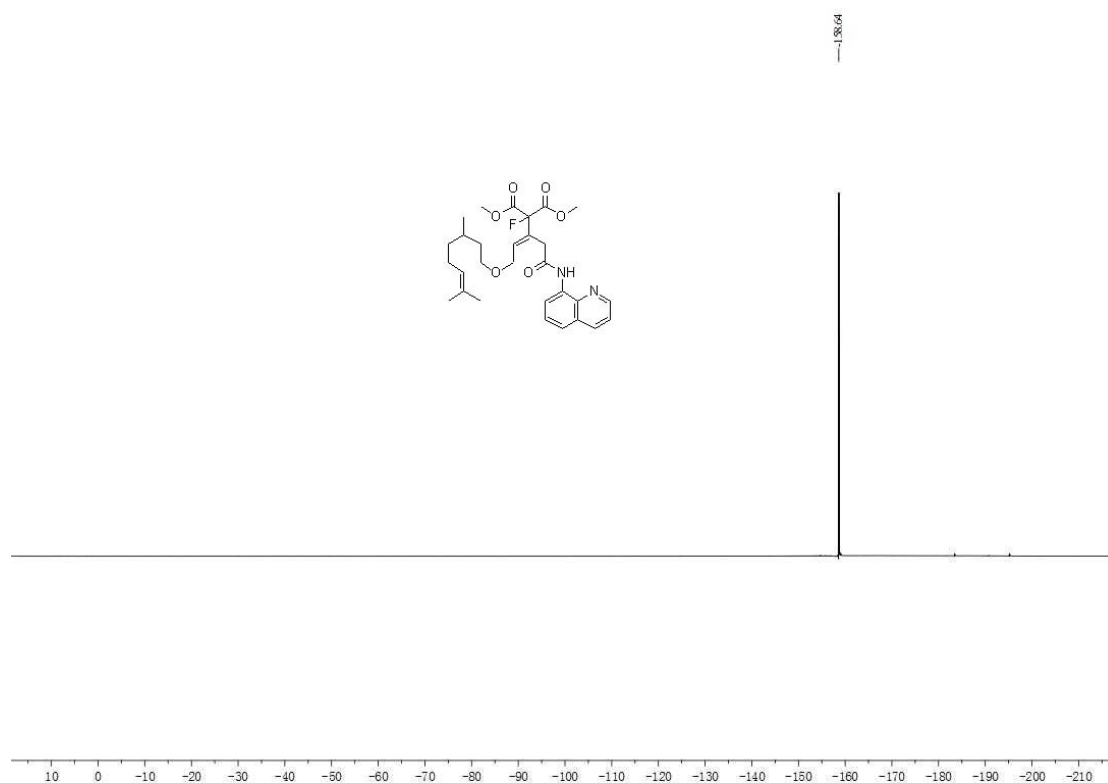

## Product 10

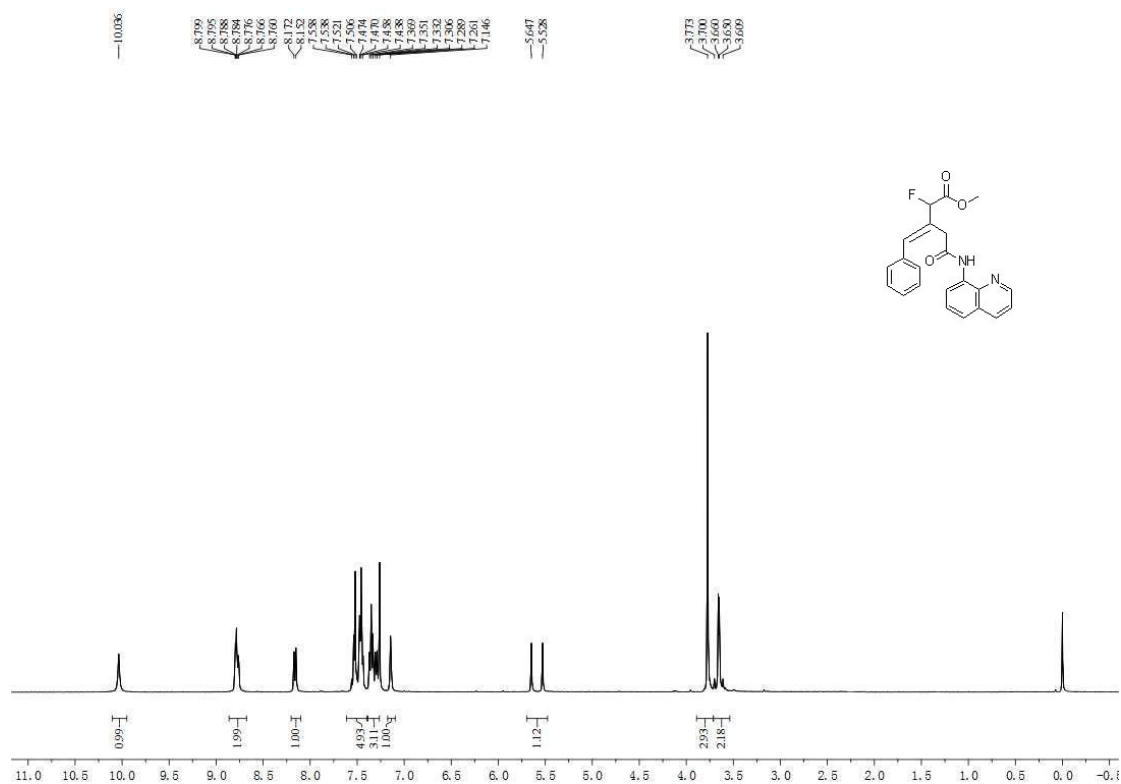

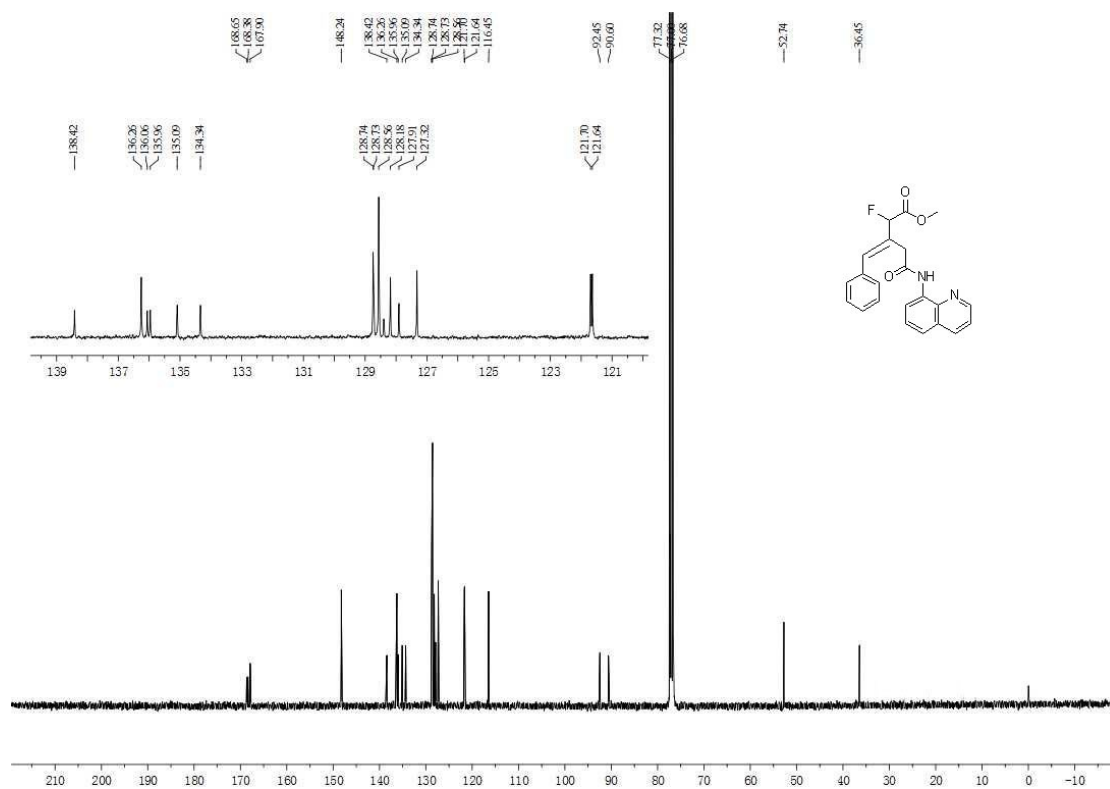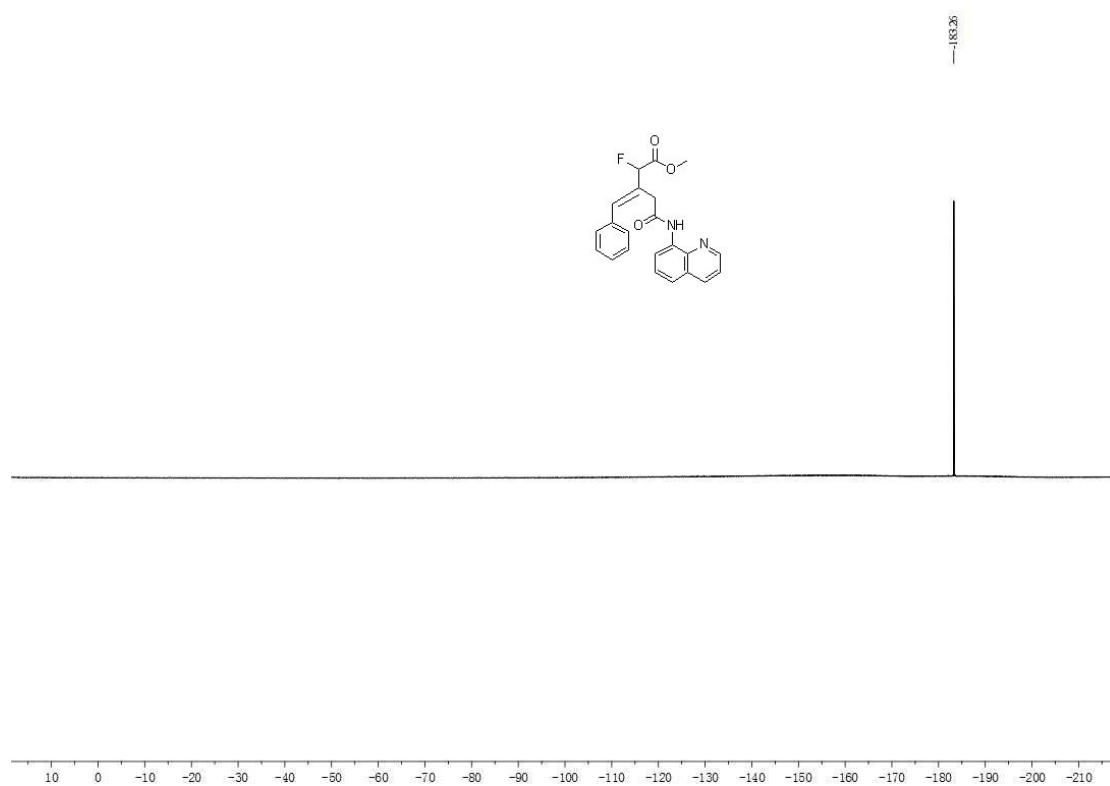

# Product 11

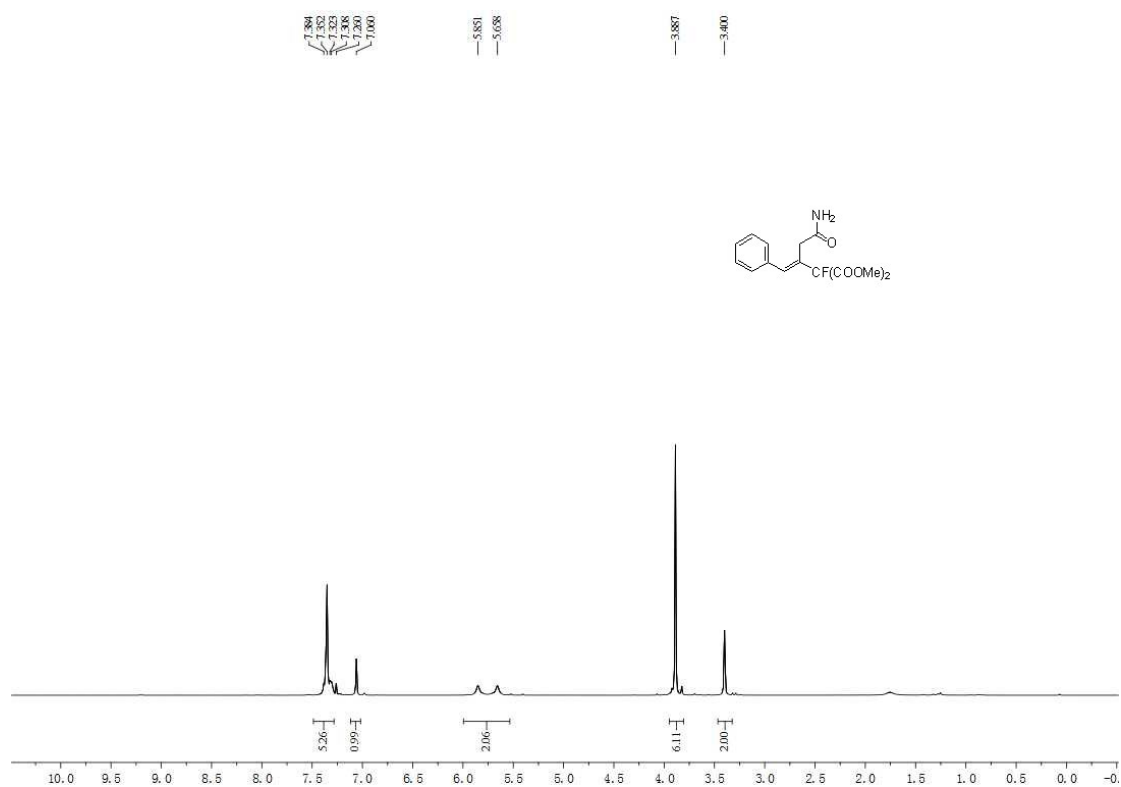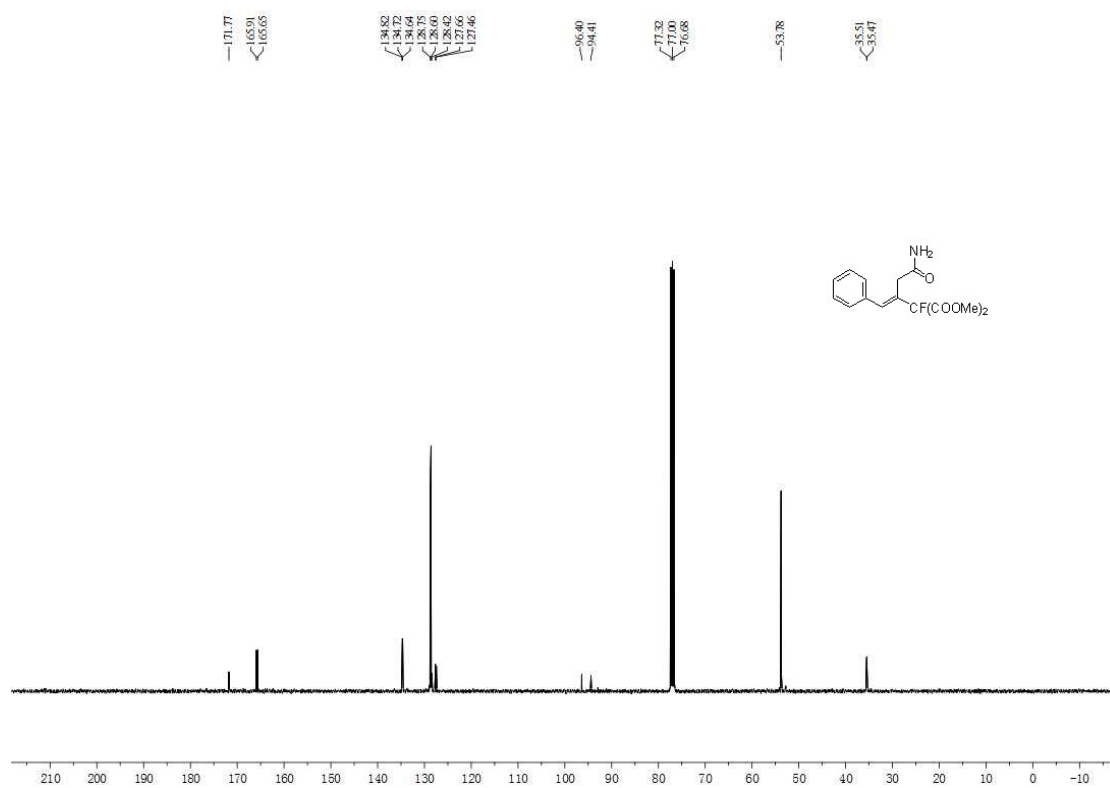

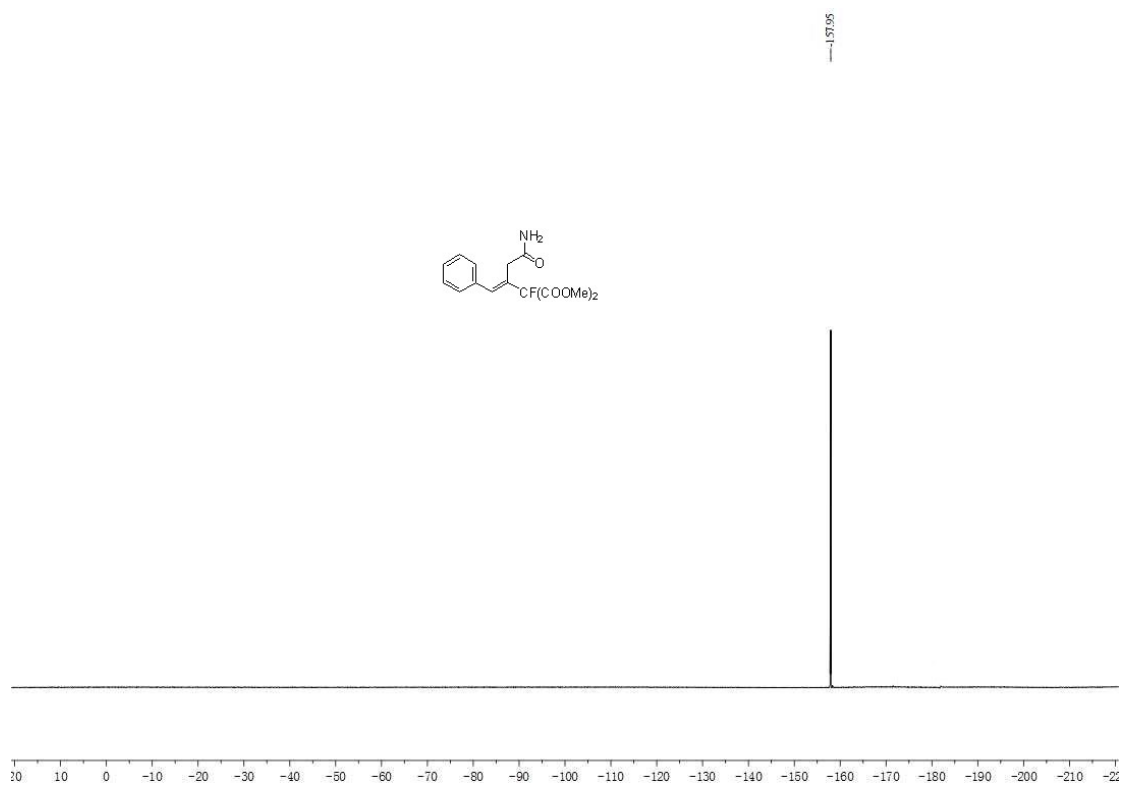

## Product 12

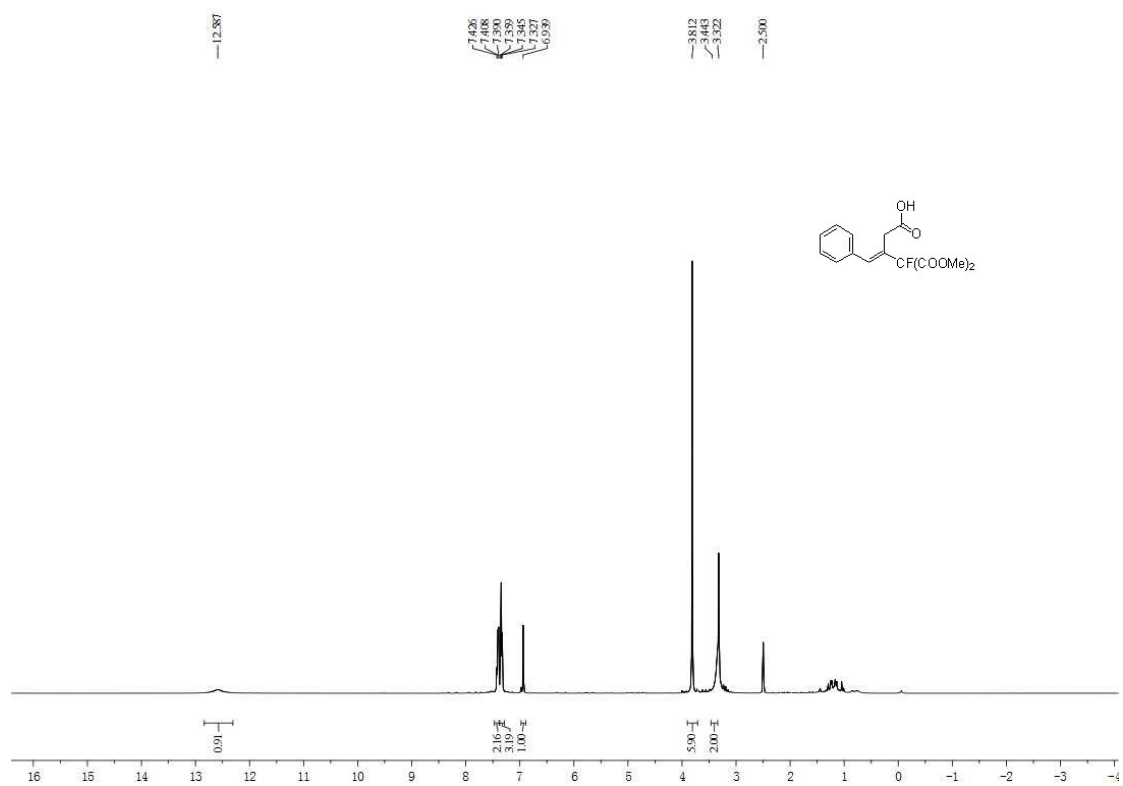

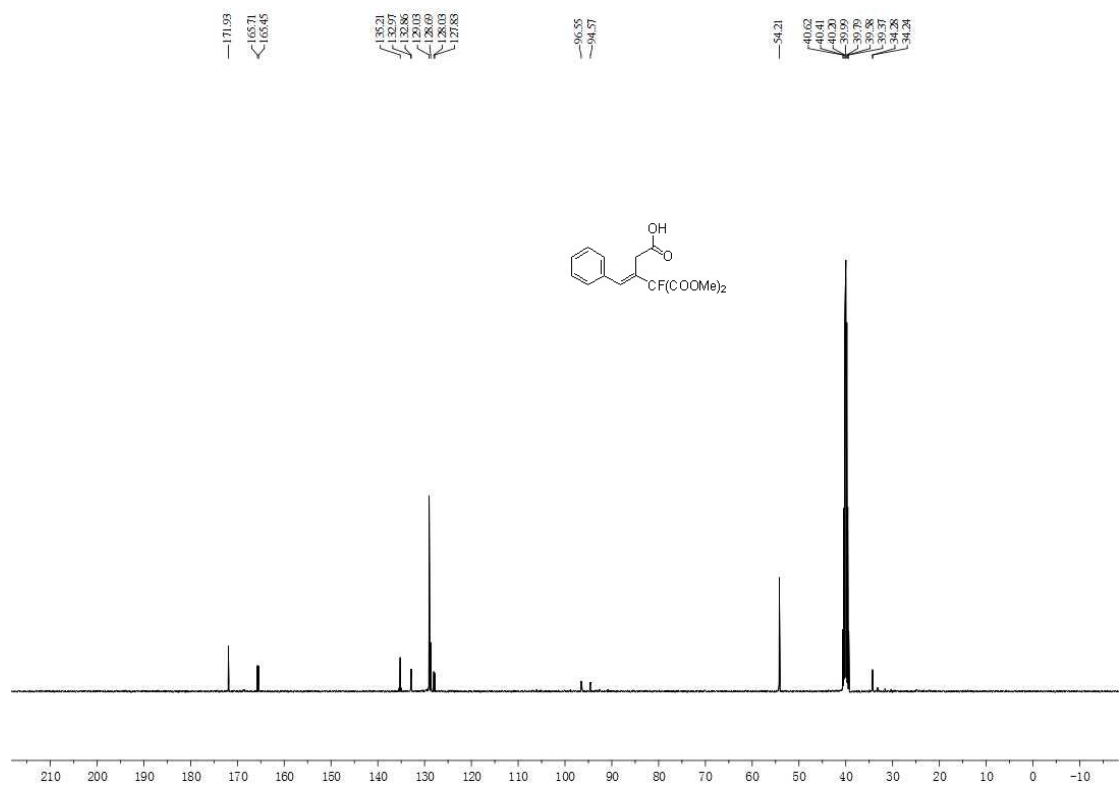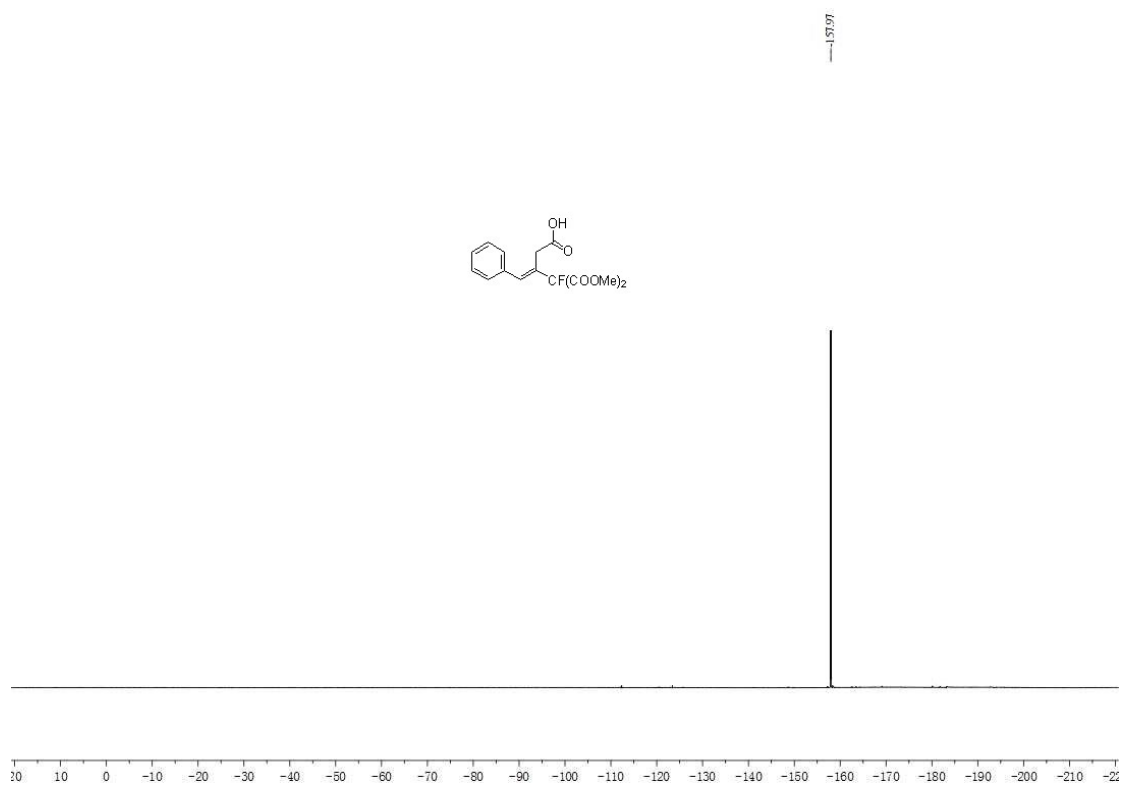

Supplement: d0cc05887d1.pdf [file d0cc05887d1.pdf]
